# Supplementary material for: Contribution of leukocyte telomere length to major cardiovascular diseases onset: insights from a large-scale genome-wide cross-trait analysis
Source: Research Square preprint supplement (doi:10.21203/rs.3.rs-4638100/v1), 2024-07-02
Supplement: Supplementary file 2 [file 1e190ad3baa554f6371675e8.xlsx]

## Sheet: Summary
Supplementary Table 1. Overview of leukocyte telomere length and six cardiovascular diseases included in this study
Supplementary Table 2. Univariate and bivariate LDSC results for leukocyte telomere length and six cardiovascular diseases
Supplementary Table 3. Univariate and bivariate MiXeR results for leukocyte telomere length and six cardiovascular diseases
Supplementary Table 4. Univariate LAVA results for each leukocyte telomere length and six cardiovascular diseases
Supplementary Table 5. Bivariate LAVA results between leukocyte telomere length and six cardiovascular diseases
Supplementary Table 6. Causal relationship between leukocyte telomere length and six cardiovascular diseases
Supplementary Table 7. Genomic risk loci identified for results of leukocyte telomere length and six cardiovascular diseases using FUMA
Supplementary Table 8. Genomic risk loci identified for single trait GWAS results of leukocyte telomere length and six cardiovascular diseases using FUMA
Supplementary Table 9. Prioritized genes identified for PLACO results of leukocyte telomere length and six cardiovascular diseases by functional annotation and mapping of genomic risk loci using FUMA
Supplementary Table 10. Prioritized genes identified for single trait GWAS results of leukocyte telomere length and six cardiovascular diseases by functional annotation and mapping of genomic risk loci using FUMA
Supplementary Table 11. Candidate pleiotropic genes identified for PLACO results of leukocyte telomere length and six cardiovascular diseases using MAGMA and e-MAGMA
Supplementary Table 12. Gene-based analysis for all genes that were nominally significant for PLACO results between leukocyte telomere length and six cardiovascular diseases
Supplementary Table 13. Gene-based analysis for all genes that were nominally significant for single trait GWAS results of leukocyte telomere length and six cardiovascular diseases
Supplementary Table 14. S-LDSC-based heritability enrichment estimates in 49 tissue types or 489 functional categories for PLACO results between leukocyte telomere length and six cardiovascular diseases using LDSC-SEG
Supplementary Table 15. e-MAGMA analysis for 10 related tissue-specific genes that were nominally significant for PLACO results between telomere length and six cardiovascular diseases
Supplementary Table 16. Transcriptome-wide association study analysis for 10 related tissue-specific genes that were nominally significant for single trait GWAS results of leukocyte telomere length and six cardiovascular diseases
Supplementary Table 17. Biological processes and enriched signaling pathways between leukocyte telomere length and six cardiovascular diseases
Supplementary Table 18. Proteome-wide MR analysis for causalities of plasma protein levels with leukocyte telomere length and six cardiovascular diseases including sensitivity analysis

## Sheet: Supplementary Table 1
Supplementary Table 1. Overview of leukocyte telomere length and six cardiovascular diseases included in this study
Note: Overview of leukocyte telomere length and six cardiovascular diseases, abbreviations as used throughout the manuscript, associated PubMed ID, Data source and Year of publication, the sample size, population and reference genome on which summary statistics are based, and the number of SNPs included in the original summary statistics, before we applied filtering.
Trait	Abbreviations	PubMed ID	Data source	Year	Population	N	N case	N control	Reference genome	Original no. of SNPs
leukocyte telomere length	LTL	34611362	https://figshare.com/s/caa99dc0f76d62990195	2021	European	472174	NA	NA	GRCh37 (hg19)	20134421
Atrial fibrillation	AF	30061737	https://www.ebi.ac.uk/gwas/studies/GCST006414	2018	European	1030836	60620	970216	GRCh37 (hg19)	34740186
Coronary artery disease	CAD	36474045	https://cvd.hugeamp.org/datasets.html	2022	European	1165690	181522	984168	GRCh37 (hg19)	20073070
Venous thromboembolism	VTE	36658437	https://www.decode.com/summarydata/	2023	European	1500861	81190	1419671	GRCh37 (hg19)	9617942
Heart failure	HF	31919418	https://www.ebi.ac.uk/gwas/studies/GCST009541	2020	European	977323	47309	930014	GRCh37 (hg19)	8281262
Peripheral artery disease	PAD	34601942	https://cvd.hugeamp.org/datasets.html	2021	European	511634	12086	499548	GRCh37 (hg19)	10250121
Stroke	Stroke	36180795	https://www.ebi.ac.uk/gwas/studies/GCST90104539	2022	European	1308460	73652	1234808	GRCh37 (hg19)	7511476

## Sheet: Supplementary Table 2
Supplementary Table 2. Univariate and bivariate LDSC results for leukocyte telomere length and six cardiovascular diseases
A) SNP-based heritability of leukocyte telomere length and six cardiovascular diseases computed using univariate LDSC
Note: SNP-based heritabilities (h2snp) for leukocyte telomere length and six cardiovascular diseases were calculated using LD Score regression, based on summary statistics. h2snp = SNP-based heritability estimate; h2snp_se = standard error of the SNP-based heritability estimate; h2snp_p =p value of the SNP-based heritability estimate; Mean χ2 = Mean chi-squared value across all SNPs in the analys…
Trait	h2 snp	h2snp_se	h2snp_p	λGC	Mean χ2	int	int_se	ratio	ratio_se
LTL	0.0276	0.003	3.58e-20	1.2531	1.6385	1.0519	0.0129	0.0813	0.0201
AF	0.025	0.0033	3.57e-14	1.2932	1.5451	1.0532	0.011	0.0975	0.0202
CAD	0.0325	0.0019	1.36e-65	1.421	1.7647	1.0223	0.0126	0.0291	0.0165
VTE	0.0182	0.0023	2.51e-15	1.3203	1.5698	1.051	0.0103	0.0896	0.0181
HF	0.008	0.0006	1.48e-40	1.127	1.1586	1.006	0.007	0.0379	0.0444
PAD	0.0094	0.0013	4.8e-13	1.0957	1.1025	1.0159	0.0071	0.1553	0.0688
Stroke	0.006	0.0005	3.55e-33	1.1876	1.2281	1.0739	0.0069	0.324	0.0301
B) Genome-wide genetic correlations between leukocyte telomere length and six cardiovascular diseases computed using bivariate LDSC
Note: Genome-wide genetic correlations between leukocyte telomere length and six cardiovascular diseases were estimated by LD Score regression, based on summary statistics. Tests are two-sided and only tests significant after correcting for multiple testing were interpreted. rg = genetic correlation; re_se = standard error of rg; rg_z = Z-score of the rg; rg_p = p-value of the rg; h2_liab = SNP-b…
P-values lower than the Bonferroni-corrected threshold (P = 0.05/6 combinations = 8.33E-03) are considered significant and marked in dark blue.
Trait 1	Trait 2	rg	rg_se	rg_z	rg_p	h2_liab	h2_liab_se	h2_int	h2_int_se	gcov_int	gcov_int_se
LTL	AF	-0.0346	0.027	-1.2821	0.1998	0.0259	0.0032	1.0406	0.0157	-0.0009	0.0065
LTL	CAD	-0.1714	0.0248	-6.916	4.6461e-12	0.0333	0.0024	1.0083	0.0211	-0.0122	0.0081
LTL	VTE	-0.0717	0.025	-2.8624	0.0042	0.0172	0.0017	1.0741	0.0243	-0.0124	0.0063
LTL	HF	-0.1448	0.0368	-3.9384	8.2029e-05	0.008	0.0007	1.0064	0.0074	-0.01	0.0057
LTL	PAD	-0.2496	0.0399	-6.261	3.8252e-10	0.0094	0.0013	1.0156	0.007	-0.0077	0.0057
LTL	Stroke	-0.104	0.0367	-2.8321	0.0046	0.006	0.0005	1.0733	0.0071	-0.0019	0.0058

## Sheet: Supplementary Table 3
Supplementary Table 3. Univariate and bivariate MiXeR results for leukocyte telomere length and six cardiovascular diseases
A) Polygenicities of leukocyte telomere length and six cardiovascular diseases computed using univariate MiXeR
Note: Polygenicities for leukocyte telomere length and six cardiovascular diseases were estimated using univariate MiXeR. pi = polygenicity estimate; pi_se = standard error of the polygenicity estimate; sig2_beta = discoverability estimate; sig2_beta_se = standard error of the discoverability estimate; h2 = heritability estimate; h2_se = standard error of the heritability estimate; nc_p9 = the nu…
Trait	Trait polygenicity		Trait discoverability				Trait heritability		Number of trait-influencing variants (at 90% heritability)		Model selection (information criterions)
	pi	pi_se	sig2_beta	sig2_beta_se	sig2_zero	sig2_zero_se	h2	h2_se	nc_p9	nc_p9_se	AIC	BIC
LTL	0.000119072	8.1802e-06	0.000254343	2.01228e-05	1.12449	0.00363585	0.0624618	0.000907053	379.734	26.0876	4646.83	4637.3
AF	0.000157971	1.83878e-05	0.000289432	5.47031e-05	1.14349	0.00397656	0.0928017	0.00176933	503.789	58.6408	2725.02	2715.5
CAD	0.00047928	9.75056e-05	6.38589e-05	1.34397e-05	1.14438	0.0164002	0.0607712	0.00180317	1528.48	310.957	2648.75	2639.23
VTE	9.66636e-05	3.03426e-05	0.000374927	0.000153993	1.16502	0.0110993	0.0658237	0.00211269	308.272	96.766	2655.89	2646.36
HF	0.000722879	6.6824e-05	2.33859e-05	1.43382e-06	1.03771	0.00340128	0.0348669	0.00133274	2305.34	213.109	34.9003	25.3714
PAD	0.000115987	7.6117e-06	0.000645527	5.1852e-05	1.06346	0.00264925	0.154501	0.00520591	369.895	24.2746	297.654	288.125
Stroke	0.000330726	3.67458e-05	3.32969e-05	2.68846e-06	1.09263	0.00362877	0.0226366	0.000937181	1054.72	117.187	94.4949	84.9661
B) Polygenic overlaps between leukocyte telomere length and six cardiovascular diseases computed using bivariate MiXeR
Note: Polygenic overlaps between leukocyte telomere length and six cardiovascular diseases were estimated using bivariate MiXeR. Dice = the ratio of shared variants to the total number of variants; Dice_se = standard error of Dice coefficient; nc1_p9, nc2_p9 and nc12_p9 = the number of influencial variants for trait1, trait2 and the overlap, respectively; nc1_p9_se, nc2_p9_se and nc12_p9_se = sta…
Trait1	Trait2	Dice Coefficient		Fraction of shared and trait-specific variants						Number of shared and trait-specific variants (at 90% heritability)						Measures of correlation						Congruency		Model selection (information criterions)
		Dice	Dice_se	pi1	pi1_se	pi2	pi2_se	pi12	pi12_se	nc1_p9	nc1_p9_se	nc2_p9	nc2_p9_se	nc12_p9	nc12_p9_se	rho_zero	rho_zero_se	rho_beta	rho_beta_se	rg	rg_se	fraction_concordant_within_shared	fraction_concordant_within_shared_se	best_vs_min_AIC	best_vs_min_BIC	best_vs_max_AIC	best_vs_max_BIC
LTL	AF	0.157045	0.0408174	9.72868e-05	9.22371e-06	0.000136186	1.81769e-05	2.1785e-05	5.88799e-06	310.259	29.4155	434.314	57.9683	69.4748	18.7775	-0.00321	0.00201302	-0.258167	0.08711	-0.0384631	0.0073798	0.416479	0.0292174	20.4791	10.9503	287.617	278.088
LTL	CAD	0.159926	0.0204339	7.16573e-05	1.24728e-05	0.000431866	9.2862e-05	4.74144e-05	7.45766e-06	228.524	39.7772	1377.27	296.148	151.21	23.7834	-0.0315812	0.00232238	-0.851196	0.0920446	-0.168147	0.00748886	0.16669	0.0589425	4.84008	-4.68874	79.3324	69.8036
LTL	VTE	0.141065	0.0485815	0.00010347	9.49214e-06	8.10614e-05	2.62227e-05	1.56022e-05	7.01655e-06	329.977	30.2715	258.514	83.6274	49.7572	22.3766	-0.0149282	0.00232549	-0.633705	0.176368	-0.0837445	0.0104182	0.273786	0.0760934	20.5262	10.9974	318.932	309.403
LTL	HF	0.138076	0.0174602	6.11e-05	9.28616e-06	0.000664907	6.52117e-05	5.79718e-05	7.51969e-06	194.855	29.6147	2120.47	207.968	184.879	23.9812	-0.0135077	0.00254322	-0.913498	0.0871217	-0.179527	0.0166676	0.116018	0.0679011	0.519936	-9.00889	10.5622	1.03337
LTL	PAD	0.229324	0.0151111	9.21205e-05	7.99937e-06	8.90353e-05	7.09492e-06	2.69513e-05	2.05556e-06	293.783	25.5109	283.944	22.6265	85.951	6.55543	-0.0130003	0.00193646	-0.96951	0.0224329	-0.222594	0.0139801	0.0722679	0.0317021	-0.141494	-9.67032	228.709	219.18
LTL	Stroke	0.148746	0.032227	8.56438e-05	1.05523e-05	0.000297298	3.54998e-05	3.3428e-05	7.62393e-06	273.128	33.6524	948.118	113.213	106.606	24.3136	-0.00288984	0.00217173	-0.761781	0.138682	-0.124362	0.01595	0.214756	0.0708575	3.18178	-6.34705	31.1748	21.6459

## Sheet: Supplementary Table 4
Supplementary Table 4. Univariate LAVA results for each leukocyte telomere length and six cardiovascular diseases
Note: results of univariate LAVA analysis, testing for local genetic signal within each trait in 2,495 regions. Tests are one-sided. Regions with a P-value < 0.0001 were deemed to harbor sufficient genetic signal for meaningful local genetic correlation estimation with other traits. locus = index of given local genomic regions; chr = chromosome; start/stop = start and end position of locus in bas…
P-values lower than 1e-04 are considered significant and marked in dark blue.
locus	chr	start	stop	n.snps	n.pcs	Trait	h2.obs	p
1	1	10539	1376204	1309	164	LTL	4.10846e-05	0.015913
2	1	1376205	2215495	1242	169	LTL	3.91329e-05	0.0213628
3	1	2215496	2983519	1621	250	LTL	8.78065e-05	0.000168643
4	1	2983520	3582047	1645	275	LTL	0.000113333	7.25059e-06
5	1	3582048	4281476	1783	202	LTL	4.46898e-05	0.0170829
6	1	4281477	4773403	1914	225	LTL	4.76576e-05	0.0160243
7	1	4773404	5362404	1895	250	LTL	4.00662e-05	0.0409325
8	1	5362405	6136814	1935	262	LTL	6.64978e-05	0.00318022
9	1	6136815	7711794	3326	319	LTL	0.000100469	0.000125147
10	1	7711795	8580987	1862	217	LTL	0.00012031	2.76644e-07
11	1	8580988	9475966	1807	273	LTL	7.38661e-05	0.0015756
12	1	9475967	10753427	2161	224	LTL	5.45484e-06	0.386643
13	1	10753428	11709173	1997	254	LTL	0.000128053	3.15079e-07
14	1	11709174	13481025	2523	283	LTL	0.000118217	4.26985e-06
15	1	13481026	14720131	2776	287	LTL	4.91525e-05	0.0238735
16	1	14720132	15755230	2940	332	LTL	0.000104701	9.22803e-05
17	1	15755231	16732168	2192	186	LTL	3.44488e-05	0.0421047
18	1	16732169	17557746	1069	170	LTL	2.09197e-05	0.129021
19	1	17557747	18427820	2226	272	LTL	0.000190414	4.01231e-12
20	1	18427821	19238924	2369	312	LTL	3.03274e-05	0.113574
21	1	19238925	20556202	3332	292	LTL	7.12973e-05	0.00274685
22	1	20556203	21416121	1872	189	LTL	0.000195044	1.76631e-15
23	1	21416122	22145629	1843	210	LTL	6.36046e-05	0.00199963
24	1	22145630	22740287	1743	212	LTL	3.22027e-05	0.0631731
25	1	22740288	23907045	1962	246	LTL	7.96611e-05	0.000475187
26	1	23907046	25885138	3329	325	LTL	7.29273e-05	0.00340264
27	1	25885139	27992665	2965	281	LTL	4.41e-05	0.0355097
28	1	27992666	29188426	1836	171	LTL	0.000116893	5.00999e-08
29	1	29188427	30405182	2304	262	LTL	5.7479e-05	0.00853803
30	1	30405183	31639217	2973	289	LTL	0.000119645	4.06435e-06
31	1	31639218	33066846	2105	218	LTL	0.00020528	2.21469e-15
32	1	33066847	34371022	2120	249	LTL	0.000102297	1.91649e-05
33	1	34371023	35201626	2042	260	LTL	6.37776e-05	0.00421478
34	1	35201627	36855139	1563	205	LTL	5.51387e-05	0.00534354
35	1	36855140	38474036	3351	310	LTL	7.41377e-05	0.00251639
36	1	38474037	40200950	3312	308	LTL	0.000172613	9.27643e-10
37	1	40200951	41093875	1820	200	LTL	4.59524e-05	0.0145292
38	1	41093876	41977966	2127	227	LTL	0.000185096	5.99523e-13
39	1	41977967	43512669	2956	231	LTL	3.9042e-05	0.0391906
40	1	43512670	45167235	2916	274	LTL	0.000156624	3.97333e-09
41	1	45167236	47257261	3160	209	LTL	0.000207159	5.85977e-16
42	1	47257262	48105233	1516	177	LTL	3.21116e-05	0.0490437
43	1	48105234	49185414	1989	231	LTL	4.69174e-05	0.0183757
44	1	49185415	51777577	2730	177	LTL	1.98948e-05	0.144754
45	1	51777578	53114186	1843	141	LTL	1.73642e-05	0.149751
46	1	53114187	54771293	3521	307	LTL	3.35646e-05	0.0901695
47	1	54771294	55727134	2514	286	LTL	3.94575e-05	0.0533732
48	1	55727135	56799636	2699	207	LTL	3.77236e-05	0.0366565
49	1	56799637	57529670	1934	229	LTL	5.65445e-05	0.00636837
50	1	57529671	58387483	2045	217	LTL	7.04758e-05	0.000917072
51	1	58387484	59889045	3294	285	LTL	4.70098e-05	0.0284134
52	1	59889046	61377615	2702	264	LTL	0.000120848	1.54645e-06
53	1	61377616	62778733	3275	324	LTL	2.09943e-05	0.201386
54	1	62778734	64344226	3110	280	LTL	0.000101608	4.73671e-05
55	1	64344227	65894184	3056	278	LTL	9.92337e-05	6.33837e-05
56	1	65894185	66778015	1899	150	LTL	8.74536e-06	0.296097
57	1	66778016	67761890	2306	186	LTL	6.18483e-05	0.0015802
58	1	67761891	68633860	1859	226	LTL	7.81869e-05	0.00038235
59	1	68633861	69438909	1838	171	LTL	4.02729e-05	0.0192319
60	1	69438910	70992905	2790	255	LTL	5.82654e-05	0.00726213
61	1	70992906	72513119	2653	207	LTL	9.55929e-05	1.5264e-05
62	1	72513120	73992170	2605	132	LTL	2.17621e-05	0.093846
63	1	73992171	75132092	1858	180	LTL	2.92695e-05	0.0659865
64	1	75132093	76097247	1821	144	LTL	6.57541e-05	0.000275313
65	1	76097248	76977915	2218	184	LTL	6.56171e-05	0.000883262
66	1	76977916	77895394	2186	199	LTL	7.05038e-05	0.000618589
67	1	77895395	79065286	2169	166	LTL	0.000150824	1.42716e-11
68	1	79065287	80099353	2676	159	LTL	1.52384e-05	0.192439
69	1	80099354	80781442	1699	115	LTL	3.84886e-05	0.00936216
70	1	80781443	82123368	3363	285	LTL	2.32083e-05	0.163982
71	1	82123369	83461215	3066	237	LTL	6.6433e-05	0.00221655
72	1	83461216	84728347	2245	196	LTL	2.11336e-05	0.142624
73	1	84728348	86017267	3133	275	LTL	2.62175e-05	0.132091
74	1	86017268	86761554	1914	144	LTL	3.5384e-05	0.0238006
75	1	86761555	87667572	1854	149	LTL	7.12809e-05	0.000126348
76	1	87667573	88656689	1931	273	LTL	7.26797e-05	0.00181262
77	1	88656690	89753964	2109	175	LTL	5.66371e-05	0.00258657
78	1	89753965	90941549	2077	237	LTL	5.34827e-05	0.00986697
79	1	90941550	91870059	1890	191	LTL	8.08343e-05	0.000103487
80	1	91870060	92904465	2059	207	LTL	0.00011758	2.93885e-07
81	1	92904466	94168576	1892	159	LTL	0.000107009	1.97722e-07
82	1	94168577	95122541	2038	209	LTL	0.000109541	1.43012e-06
83	1	95122542	96147576	2489	221	LTL	5.09915e-05	0.0107228
84	1	96147577	97721186	3014	217	LTL	1.46994e-05	0.234304
85	1	97721187	99425000	3512	264	LTL	9.36278e-05	0.000101763
86	1	99425001	100269207	1971	197	LTL	1.42653e-05	0.23022
87	1	100269208	101188315	1679	120	LTL	1.42497e-05	0.175728
88	1	101188316	102424611	2935	249	LTL	5.53099e-05	0.00929835
89	1	102424612	103148412	1748	117	LTL	8.68622e-06	0.274304
91	1	103784542	104984435	1852	148	LTL	1.47165e-05	0.192096
92	1	104984436	106089656	3275	174	LTL	1.66455e-05	0.182968
94	1	106864948	107874653	1849	186	LTL	5.53488e-05	0.0037984
95	1	107874654	109271449	2682	253	LTL	8.49786e-05	0.000266666
96	1	109271450	110224230	1943	216	LTL	7.01891e-05	0.000934364
97	1	110224231	111134062	1800	277	LTL	0.000205022	2.37081e-13
98	1	111134063	112489248	3365	288	LTL	6.92728e-05	0.00326505
100	1	113418038	114664387	1930	223	LTL	0.000300275	2.43703e-26
101	1	114664388	116207297	3523	274	LTL	0.000112921	7.51181e-06
102	1	116207298	117046311	1733	192	LTL	8.66645e-05	4.10894e-05
103	1	117046312	118118667	1862	241	LTL	3.27283e-05	0.0716573
104	1	118118668	119408888	2480	195	LTL	7.13865e-05	0.000494556
105	1	119408889	120345066	1860	205	LTL	3.02133e-05	0.0718072
106	1	120345067	145803848	261	46	LTL	4.04498e-05	0.000272886
107	1	145803849	147083835	1517	120	LTL	4.93848e-05	0.00196084
108	1	147083836	149716037	844	119	LTL	5.59385e-05	0.000621253
109	1	149716038	151146407	1968	148	LTL	5.2351e-06	0.366707
110	1	151146408	152535630	1996	212	LTL	0.000126816	6.283e-08
111	1	152535631	153410809	1699	166	LTL	2.07827e-06	0.440151
112	1	153410810	154685545	1857	212	LTL	7.15752e-05	0.000710488
113	1	154685546	156813845	2787	315	LTL	2.8064e-05	0.131999
114	1	156813846	158081627	2989	276	LTL	2.59261e-05	0.135028
116	1	158900370	159882515	2065	210	LTL	5.07741e-05	0.00957952
117	1	159882516	161054076	2432	280	LTL	5.61028e-05	0.0117665
118	1	161054077	161945442	1804	188	LTL	7.3682e-05	0.000292398
119	1	161945443	163141862	2922	281	LTL	6.91523e-05	0.00302912
120	1	163141863	163854567	1835	158	LTL	5.08221e-05	0.00407668
121	1	163854568	164726579	1797	218	LTL	1.22248e-05	0.271308
122	1	164726580	165553812	2089	247	LTL	2.81169e-05	0.10486
123	1	165553813	166458031	1785	220	LTL	3.03799e-05	0.0773375
124	1	166458032	167163954	1949	165	LTL	1.92894e-05	0.143813
125	1	167163955	168179086	2029	257	LTL	9.68065e-05	5.44561e-05
126	1	168179087	169521551	3371	284	LTL	3.81671e-05	0.0584063
127	1	169521552	170193207	1905	109	LTL	3.77465e-06	0.38255
128	1	170193208	171044255	1773	155	LTL	1.49008e-05	0.194524
129	1	171044256	172465153	3265	227	LTL	7.05279e-05	0.00110673
130	1	172465154	173582511	1843	220	LTL	8.57384e-05	0.000109616
131	1	173582512	175385220	2941	151	LTL	4.22821e-05	0.0112191
132	1	175385221	176449096	1957	205	LTL	6.08062e-05	0.0026272
134	1	177746473	178915113	2181	182	LTL	5.6361e-05	0.00308519
135	1	178915114	180221608	3412	198	LTL	3.09726e-05	0.0641764
136	1	180221609	181324205	2270	217	LTL	7.69849e-05	0.000369945
138	1	182420541	183920616	3110	242	LTL	4.45982e-05	0.0254966
139	1	183920617	184953089	1913	203	LTL	6.54277e-05	0.00137215
140	1	184953090	186179447	1580	202	LTL	7.42643e-05	0.000384327
141	1	186179448	187072605	1824	146	LTL	6.07338e-05	0.000678431
142	1	187072606	187757076	1746	149	LTL	5.66833e-05	0.00140084
144	1	188625773	189904637	2891	132	LTL	8.83044e-07	0.461976
146	1	191419276	192468373	2100	159	LTL	6.01767e-05	0.00106755
147	1	192468374	193575516	1849	186	LTL	7.10551e-05	0.000413949
148	1	193575517	194365688	2099	133	LTL	4.90736e-05	0.00296162
149	1	194365689	195161235	2308	103	LTL	1.11712e-05	0.211621
150	1	195161236	196179110	2236	190	LTL	4.06967e-05	0.0229791
151	1	196179111	197935821	2228	178	LTL	4.13064e-05	0.0186744
152	1	197935822	199263389	2798	222	LTL	1.30393e-05	0.260785
153	1	199263390	200134005	2393	165	LTL	3.6e-05	0.028944
154	1	200134006	201067952	2003	200	LTL	7.62986e-05	0.00026995
155	1	201067953	202583884	3299	343	LTL	0.000143484	4.76097e-07
156	1	202583885	204092537	3091	325	LTL	0.000139398	5.3113e-07
157	1	204092538	205009623	1988	251	LTL	5.24935e-05	0.0127287
158	1	205009624	205917548	2159	237	LTL	4.46555e-05	0.0242944
159	1	205917549	208162951	2867	268	LTL	2.26798e-05	0.162189
160	1	208162952	209711169	3266	340	LTL	8.06736e-05	0.00178575
161	1	209711170	211082892	3025	273	LTL	5.0616e-05	0.0187244
162	1	211082893	212347582	3346	225	LTL	4.73379e-05	0.0165658
163	1	212347583	213958292	3512	289	LTL	0.000148852	3.14013e-08
164	1	213958293	214783872	1879	228	LTL	5.93997e-05	0.00451052
165	1	214783873	215825791	1761	161	LTL	5.49352e-05	0.00243366
166	1	215825792	216658126	1861	223	LTL	5.80575e-05	0.00491806
167	1	216658127	217352165	1853	227	LTL	2.41648e-05	0.128946
168	1	217352166	218563960	3211	247	LTL	4.68509e-05	0.0214527
169	1	218563961	220073132	3558	237	LTL	5.39879e-05	0.00934372
170	1	220073133	220978151	1800	172	LTL	5.82152e-05	0.00194611
171	1	220978152	221856864	2028	163	LTL	5.42979e-05	0.00278457
172	1	221856865	222763597	1694	203	LTL	6.00215e-05	0.00280589
173	1	222763598	223654902	1777	185	LTL	3.57656e-06	0.412905
174	1	223654903	224943337	2273	214	LTL	6.26227e-06	0.369527
175	1	224943338	226534711	3220	231	LTL	0.000193477	1.16174e-13
176	1	226534712	228045554	3665	225	LTL	0.000321302	6.56239e-29
177	1	228045555	229075156	1792	193	LTL	5.37519e-05	0.00524867
178	1	229075157	230227247	1981	286	LTL	8.40455e-05	0.000561127
179	1	230227248	231287764	3178	295	LTL	5.00764e-05	0.0233149
180	1	231287765	232177704	1793	230	LTL	3.30959e-05	0.0653913
181	1	232177705	232954942	2024	259	LTL	5.64451e-05	0.00920743
182	1	232954943	233639473	1920	199	LTL	3.73709e-05	0.0353902
183	1	233639474	234365796	2087	233	LTL	7.98265e-06	0.345367
185	1	235097114	236199671	1884	214	LTL	5.85394e-05	0.00405604
186	1	236199672	237409458	3356	298	LTL	5.44466e-05	0.0160978
187	1	237409459	238094455	1953	250	LTL	4.09843e-05	0.0377626
188	1	238094456	238704857	1867	153	LTL	2.07314e-05	0.119497
190	1	239332149	240248508	2261	254	LTL	2.71949e-05	0.115115
191	1	240248509	241033584	1876	274	LTL	0.000124501	1.17889e-06
192	1	241033585	241813534	1903	268	LTL	4.80492e-05	0.0228251
193	1	241813535	242417923	1843	232	LTL	4.19492e-05	0.0301594
194	1	242417924	243048003	1767	202	LTL	4.21324e-05	0.0224346
195	1	243048004	244723196	2674	302	LTL	0.000143156	1.36508e-07
196	1	244723197	245970505	2997	348	LTL	6.7008e-05	0.00761707
197	1	245970506	246610290	2068	146	LTL	1.92265e-05	0.130939
198	1	246610291	247531112	2442	228	LTL	5.63112e-05	0.00645418
199	1	247531113	248341594	2365	220	LTL	7.59705e-05	0.000457249
200	1	248341595	249240538	1095	74	LTL	1.90962e-05	0.0653831
201	2	10181	789195	1825	201	LTL	3.61048e-05	0.040742
202	2	789196	1376545	2040	142	LTL	1.42597e-05	0.194403
203	2	1376546	1875060	1652	210	LTL	0.000123553	1.07554e-07
204	2	1875061	2680063	1998	255	LTL	0.000126326	4.42904e-07
205	2	2680064	3314202	1789	250	LTL	7.67971e-05	0.000748254
206	2	3314203	4016104	1886	244	LTL	8.39059e-05	0.00025508
207	2	4016105	4766969	1950	213	LTL	6.98788e-05	0.00091688
208	2	4766970	5568653	1731	204	LTL	3.64709e-05	0.0403266
209	2	5568654	6306606	2078	237	LTL	9.1371e-05	7.33168e-05
210	2	6306607	7108208	1979	245	LTL	9.18674e-05	8.34785e-05
211	2	7108209	7966709	2052	210	LTL	8.54749e-05	8.67094e-05
212	2	7966710	8978798	1958	278	LTL	0.000144917	4.07652e-08
213	2	8978799	9960670	1876	233	LTL	0.000117369	9.19335e-07
214	2	9960671	10611654	2118	252	LTL	5.57206e-05	0.00920441
215	2	10611655	11230349	1950	246	LTL	7.59357e-05	0.000777423
216	2	11230350	11995765	1857	244	LTL	6.38733e-05	0.00335275
217	2	11995766	12732506	1920	255	LTL	3.47564e-05	0.0656565
218	2	12732507	13625450	2220	165	LTL	3.53606e-05	0.031054
220	2	14692121	15721703	2092	191	LTL	5.41705e-05	0.00481863
221	2	15721704	17241115	3483	336	LTL	0.000234187	1.92304e-14
222	2	17241116	18656325	3628	258	LTL	0.000175119	4.32164e-11
223	2	18656326	20064517	3499	282	LTL	6.05791e-05	0.0076641
224	2	20064518	21084898	2416	282	LTL	4.53536e-05	0.0321218
226	2	22429641	23538527	2269	257	LTL	0.000147765	9.67444e-09
227	2	23538528	24669224	2733	216	LTL	3.86354e-05	0.0362063
228	2	24669225	25895394	2058	208	LTL	8.25095e-05	0.000129829
229	2	25895395	26894102	1808	218	LTL	7.67823e-05	0.000389658
230	2	26894103	28819510	2964	267	LTL	8.87912e-05	0.000212179
231	2	28819511	29627932	1891	215	LTL	7.29182e-05	0.000628576
232	2	29627933	30575619	2251	258	LTL	8.32234e-05	0.000374247
233	2	30575620	31457418	2529	244	LTL	7.96253e-05	0.000458739
234	2	31457419	33123604	2901	240	LTL	4.0577e-05	0.0364454
235	2	33123605	33735318	1921	235	LTL	6.97548e-05	0.00141426
236	2	33735319	34239776	1716	171	LTL	0.000108252	3.02569e-07
237	2	34239777	34890558	1661	174	LTL	3.73458e-05	0.0276525
238	2	34890559	35609257	1947	161	LTL	3.37098e-05	0.0355692
239	2	35609258	36120743	1816	128	LTL	9.39681e-06	0.268562
240	2	36120744	36867389	2012	223	LTL	6.08525e-05	0.0035181
241	2	36867390	37603360	1928	205	LTL	2.58576e-06	0.436222
242	2	37603361	38887393	3308	288	LTL	6.7809e-06	0.378604
244	2	40087419	40786176	1859	228	LTL	6.64995e-05	0.0018944
245	2	40786177	41540439	1905	178	LTL	1.30122e-05	0.238465
246	2	41540440	42307418	2389	206	LTL	7.33896e-05	0.00048038
247	2	42307419	43295776	2196	232	LTL	5.97876e-05	0.00456219
248	2	43295777	44104110	1937	217	LTL	0.000116767	5.34131e-07
250	2	45189469	45850047	1851	250	LTL	0.000115642	2.29408e-06
251	2	45850048	46499326	1912	306	LTL	0.000106653	4.19844e-05
252	2	46499327	47320114	2269	264	LTL	2.68697e-05	0.12202
253	2	47320115	48171058	1971	276	LTL	3.37242e-05	0.0786701
254	2	48171059	49114132	2154	212	LTL	7.35999e-05	0.000534702
255	2	49114133	49849185	2011	202	LTL	4.44313e-05	0.0175675
256	2	49849186	50756240	2149	194	LTL	7.54517e-05	0.000262079
257	2	50756241	51669493	2011	199	LTL	4.77294e-05	0.0117509
258	2	51669494	52494111	1955	206	LTL	6.93266e-05	0.000854304
259	2	52494112	53032976	1791	133	LTL	1.37617e-05	0.194893
260	2	53032977	53852120	2382	226	LTL	0.000154008	5.38924e-10
261	2	53852121	54688234	1856	168	LTL	0.000621973	1.06207e-81
262	2	54688235	55663336	2348	205	LTL	0.000189792	3.14865e-14
263	2	55663337	56394698	1878	174	LTL	7.93982e-05	7.58768e-05
264	2	56394699	57433653	2244	204	LTL	1.53738e-05	0.218151
265	2	57433654	57952945	1594	125	LTL	1.82023e-05	0.125996
266	2	57952946	59251996	2065	221	LTL	0.000124137	1.61395e-07
267	2	59251997	60775066	3176	306	LTL	0.000149574	5.29083e-08
268	2	60775067	62429910	2640	230	LTL	6.7266e-05	0.00177919
269	2	62429911	63672118	1911	216	LTL	2.23055e-05	0.141394
270	2	63672119	64696089	1853	174	LTL	6.03549e-05	0.00149934
271	2	64696090	65938002	2715	294	LTL	0.000193055	8.44253e-12
272	2	65938003	67224027	2771	272	LTL	1.60737e-05	0.239764
273	2	67224028	67979828	2037	198	LTL	4.10878e-05	0.0240083
274	2	67979829	68877774	2074	206	LTL	0.000125772	5.69686e-08
275	2	68877775	70756283	3492	290	LTL	7.24308e-05	0.00235945
276	2	70756284	71385813	1853	220	LTL	2.82819e-05	0.0916198
277	2	71385814	72160302	1846	225	LTL	4.57513e-05	0.0194983
279	2	73544291	75148103	2259	246	LTL	5.47704e-05	0.00952171
280	2	75148104	75942397	2023	237	LTL	5.27669e-05	0.0106532
281	2	75942398	76649030	1882	141	LTL	3.67118e-05	0.0193549
282	2	76649031	77372830	1896	196	LTL	2.87059e-05	0.0773549
283	2	77372831	78080057	1771	218	LTL	3.86451e-05	0.036766
284	2	78080058	79019676	2082	154	LTL	6.69803e-06	0.338858
286	2	79900056	80737811	1846	270	LTL	0.000144294	3.28132e-08
287	2	80737812	81623357	1744	168	LTL	2.64446e-05	0.0786291
289	2	82941456	84395899	3138	161	LTL	5.17513e-05	0.00381186
290	2	84395900	85992794	3172	263	LTL	0.000120859	1.49264e-06
291	2	85992795	86867032	2009	130	LTL	1.99699e-05	0.110187
292	2	86867033	88547312	875	145	LTL	2.52975e-05	0.0734034
293	2	88547313	91860961	1116	110	LTL	2.54122e-05	0.0497976
294	2	91860962	97339301	975	115	LTL	1.17571e-05	0.212785
295	2	97339302	98989360	1786	154	LTL	8.00597e-05	3.17979e-05
296	2	98989361	100202436	2007	144	LTL	1.09968e-05	0.250255
297	2	100202437	101556799	2984	209	LTL	3.84497e-05	0.0347563
298	2	101556800	102494487	1851	198	LTL	2.20493e-05	0.134223
300	2	103305258	105120578	2792	261	LTL	7.05478e-05	0.00195359
301	2	105120579	106546524	3441	303	LTL	8.69918e-05	0.000516857
302	2	106546525	107412295	2128	203	LTL	6.06515e-05	0.00258646
305	2	110097869	112644828	2459	262	LTL	0.000177004	3.69084e-11
306	2	112644829	113930668	2536	208	LTL	4.35075e-05	0.0206824
307	2	113930669	115203835	2169	201	LTL	4.08332e-05	0.0254185
308	2	115203836	116415816	2277	207	LTL	6.03647e-05	0.00287911
309	2	116415817	117822516	2957	172	LTL	4.59032e-06	0.388913
310	2	117822517	118663653	1837	135	LTL	9.66628e-06	0.268497
312	2	119635490	121073752	2911	255	LTL	2.59373e-05	0.126055
313	2	121073753	122026817	2213	298	LTL	7.19782e-05	0.0027476
314	2	122026818	123219243	2181	164	LTL	2.32315e-05	0.102436
315	2	123219244	123929872	1868	132	LTL	2.63657e-05	0.0579926
316	2	123929873	124730991	1893	128	LTL	3.45189e-06	0.398876
317	2	124730992	125741528	2292	210	LTL	5.24137e-05	0.00793612
319	2	126754028	127895644	3027	238	LTL	5.86432e-05	0.00564765
320	2	127895645	129486897	3690	271	LTL	7.1593e-05	0.00200016
321	2	129486898	130485398	2415	199	LTL	5.10269e-05	0.00801101
322	2	130485399	131760638	1304	164	LTL	3.19755e-05	0.0441166
324	2	132598286	133352950	904	110	LTL	6.23332e-06	0.323142
325	2	133352951	134359059	1973	254	LTL	0.000107827	9.30885e-06
326	2	134359060	135160197	1888	223	LTL	1.64296e-06	0.456421
327	2	135160198	137061003	2662	164	LTL	9.81526e-05	1.59293e-06
328	2	137061004	138073791	2734	172	LTL	4.22368e-05	0.0155109
329	2	138073792	139505819	2869	215	LTL	2.25342e-05	0.138568
330	2	139505820	140934531	3670	211	LTL	1.46413e-05	0.232136
331	2	140934532	141802664	2710	178	LTL	2.37764e-05	0.106091
332	2	141802665	142494980	2317	149	LTL	3.16907e-08	0.483861
333	2	142494981	143259780	1905	176	LTL	9.61372e-06	0.294357
334	2	143259781	144503688	2181	213	LTL	4.12116e-05	0.0274551
335	2	144503689	145977920	1876	250	LTL	7.81094e-05	0.000630667
336	2	145977921	147252196	2065	205	LTL	1.22665e-05	0.264616
337	2	147252197	149568875	3552	249	LTL	2.31299e-05	0.149287
338	2	149568876	151428988	3346	293	LTL	5.87518e-05	0.0102519
339	2	151428989	152497375	2445	202	LTL	6.42486e-06	0.362932
340	2	152497376	153999309	3056	221	LTL	4.17447e-05	0.0280029
341	2	153999310	155207969	2799	206	LTL	3.25568e-06	0.423487
342	2	155207970	156130947	1972	196	LTL	2.41358e-05	0.113118
343	2	156130948	157556096	2479	205	LTL	9.64211e-06	0.307293
344	2	157556097	159040979	2146	251	LTL	7.10452e-05	0.00157436
345	2	159040980	160200379	3074	215	LTL	3.95077e-05	0.0330278
346	2	160200380	161432089	2816	180	LTL	1.89849e-05	0.157214
347	2	161432090	163607635	3375	238	LTL	1.79086e-05	0.201987
349	2	164702313	165917788	2011	202	LTL	0.000113585	4.98368e-07
350	2	165917789	167488576	3125	229	LTL	3.52863e-05	0.0539518
351	2	167488577	168437445	1902	112	LTL	4.28194e-05	0.00448185
352	2	168437446	169224445	1861	223	LTL	4.8437e-05	0.014452
353	2	169224446	170155561	1954	240	LTL	3.48767e-05	0.0597921
354	2	170155562	170865765	1874	128	LTL	1.62449e-05	0.153802
355	2	170865766	171566482	1947	265	LTL	3.26325e-05	0.0812148
356	2	171566483	172501315	1855	166	LTL	1.51311e-05	0.19881
357	2	172501316	173287857	1757	195	LTL	6.71689e-06	0.35522
358	2	173287858	174118389	2124	197	LTL	4.54513e-05	0.014813
359	2	174118390	174927563	1852	271	LTL	0.000122787	1.41614e-06
360	2	174927564	176734750	3416	267	LTL	5.14989e-05	0.016351
361	2	176734751	178149981	2904	293	LTL	7.00346e-05	0.00319482
362	2	178149982	179224870	2543	141	LTL	4.66475e-05	0.00512023
363	2	179224871	180336045	2080	216	LTL	4.52355e-05	0.018771
364	2	180336046	181309939	2461	214	LTL	5.15759e-05	0.00920998
365	2	181309940	182307877	2274	188	LTL	1.5571e-05	0.206389
366	2	182307878	183352290	2014	193	LTL	2.96306e-05	0.069949
368	2	184148656	184866232	1691	151	LTL	5.03111e-05	0.00377672
370	2	186244921	187498047	2190	98	LTL	1.93928e-05	0.0877211
371	2	187498048	188895310	2563	165	LTL	1.74287e-05	0.166641
372	2	188895311	189882702	1938	114	LTL	1.93521e-05	0.103167
373	2	189882703	191051954	2184	166	LTL	6.52133e-05	0.000593267
374	2	191051955	193033982	3368	300	LTL	5.69583e-05	0.0129575
376	2	195300251	196446299	2566	173	LTL	5.70312e-05	0.00234899
377	2	196446300	198140350	3090	210	LTL	3.34471e-05	0.0558476
378	2	198140351	199654969	1937	191	LTL	2.33467e-05	0.117574
379	2	199654970	201324132	2405	207	LTL	7.92986e-05	0.000206074
380	2	201324133	202504862	2044	177	LTL	8.64803e-05	2.49208e-05
381	2	202504863	203639686	1815	210	LTL	0.000167895	8.75625e-12
382	2	203639687	205038119	2281	183	LTL	6.64844e-05	0.000759573
383	2	205038120	206821199	3288	352	LTL	5.04965e-05	0.0321078
385	2	207726595	208674588	1867	233	LTL	5.53667e-05	0.00765467
386	2	208674589	209940230	2351	234	LTL	9.04276e-05	7.81133e-05
387	2	209940231	210842457	2052	123	LTL	0.000252042	1.919e-27
388	2	210842458	212520453	3321	268	LTL	8.46558e-05	0.000375775
389	2	212520454	213194362	2029	187	LTL	4.31893e-06	0.398626
390	2	213194363	214044566	1956	209	LTL	8.01925e-05	0.000189741
391	2	214044567	215002484	2149	131	LTL	6.73749e-05	0.000126115
392	2	215002485	215899570	1938	196	LTL	5.01622e-05	0.00850409
393	2	215899571	217566011	3539	333	LTL	0.000173395	2.31886e-09
394	2	217566012	218396258	2094	225	LTL	4.16526e-05	0.0292554
395	2	218396259	219678783	2193	232	LTL	8.85405e-05	9.83865e-05
396	2	219678784	220771552	1835	247	LTL	3.92086e-05	0.0432247
397	2	220771553	221445191	1887	179	LTL	1.21516e-05	0.252795
398	2	221445192	222327713	1835	242	LTL	5.25066e-05	0.0115701
399	2	222327714	223353965	1861	239	LTL	9.57794e-05	3.96298e-05
400	2	223353966	224123079	2009	170	LTL	4.10291e-05	0.0173918
401	2	224123080	224938731	1799	208	LTL	7.14212e-05	0.000665442
402	2	224938732	226242842	3105	220	LTL	3.1845e-05	0.0684532
404	2	227557842	228812485	3493	279	LTL	0.000100476	5.43824e-05
405	2	228812486	229764918	1972	182	LTL	3.22927e-05	0.0502745
406	2	229764919	230541092	2086	241	LTL	3.41382e-05	0.0639197
407	2	230541093	231847386	3107	286	LTL	0.000104717	3.4956e-05
408	2	231847387	233352722	3176	274	LTL	0.000158864	2.59684e-09
409	2	233352723	234115092	1840	226	LTL	6.19195e-05	0.00323686
410	2	234115093	234945577	1892	213	LTL	4.6432e-05	0.0160242
411	2	234945578	235625789	2253	267	LTL	6.06688e-05	0.00644669
412	2	235625790	236276287	2024	261	LTL	9.33829e-05	9.83626e-05
413	2	236276288	237194297	1942	248	LTL	8.38543e-05	0.000280015
414	2	237194298	238185482	2167	240	LTL	8.10472e-05	0.000347852
415	2	238185483	238814630	1799	213	LTL	8.88503e-06	0.323307
416	2	238814631	239634350	2339	209	LTL	4.25838e-05	0.0229943
417	2	239634351	240325600	1816	266	LTL	5.18257e-05	0.0157012
418	2	240325601	241113279	2400	285	LTL	9.2266e-05	0.0001912
419	2	241113280	241910366	2527	262	LTL	3.98333e-05	0.0451322
420	2	241910367	243188366	2592	232	LTL	1.99471e-05	0.174916
421	3	60197	795746	1719	248	LTL	7.1168e-05	0.0014765
422	3	795747	1440048	1886	256	LTL	4.81694e-05	0.0204397
423	3	1440049	2140011	2732	261	LTL	2.3346e-05	0.15254
424	3	2140012	3128152	3128	358	LTL	2.00305e-05	0.22284
425	3	3128153	4109393	3105	303	LTL	3.73088e-05	0.068143
426	3	4109394	4835083	1906	262	LTL	8.93865e-05	0.000176077
427	3	4835084	5496182	1649	294	LTL	7.72561e-05	0.00143733
429	3	6421146	7529554	2894	283	LTL	3.20572e-05	0.0913691
431	3	8664893	9970731	3070	355	LTL	8.9566e-05	0.000816437
432	3	9970732	11226367	3185	328	LTL	8.2519e-05	0.00125619
433	3	11226368	11997658	1795	231	LTL	7.94416e-05	0.000358005
434	3	11997659	12859209	1878	164	LTL	7.46207e-06	0.328451
435	3	12859210	14312007	3624	334	LTL	8.291e-05	0.00130013
436	3	14312008	15150876	2079	270	LTL	2.34432e-05	0.155471
437	3	15150877	16084005	1785	179	LTL	8.61256e-06	0.313865
438	3	16084006	17182494	2908	277	LTL	8.96464e-05	0.00023135
439	3	17182495	19030988	3421	222	LTL	2.36054e-05	0.131711
440	3	19030989	20754842	3494	249	LTL	6.58361e-05	0.0028605
441	3	20754843	21790867	3050	268	LTL	0.000104938	2.15608e-05
442	3	21790868	22648001	3060	260	LTL	6.82661e-05	0.00252034
443	3	22648002	23426044	1809	141	LTL	3.50829e-05	0.0236561
444	3	23426045	24270189	1842	212	LTL	9.74448e-05	1.32619e-05
445	3	24270190	25516193	3524	316	LTL	0.000145381	1.52033e-07
446	3	25516194	26905340	2780	250	LTL	7.01831e-05	0.00172223
447	3	26905341	27614908	1817	113	LTL	5.84542e-05	0.000310538
448	3	27614909	28649810	1940	210	LTL	2.40383e-06	0.440459
449	3	28649811	29877022	3556	305	LTL	0.000132103	9.21067e-07
450	3	29877023	31269697	3536	296	LTL	3.09783e-05	0.103272
451	3	31269698	32378805	2593	296	LTL	0.000119419	5.12114e-06
452	3	32378806	33020868	1628	187	LTL	6.33764e-05	0.00130333
453	3	33020869	33991869	1933	177	LTL	6.5219e-05	0.000790402
454	3	33991870	35009559	2211	182	LTL	2.43864e-05	0.103041
455	3	35009560	35913033	1791	175	LTL	1.73422e-05	0.174428
456	3	35913034	36840136	2352	219	LTL	1.76946e-05	0.1953
457	3	36840137	38729767	3312	286	LTL	1.17256e-05	0.303849
459	3	39605997	40897627	2138	189	LTL	6.74491e-05	0.000761502
460	3	40897628	42301657	2946	220	LTL	1.86759e-05	0.18374
461	3	42301658	44141693	3339	295	LTL	0.000132465	6.3463e-07
462	3	44141694	45844191	3263	255	LTL	8.72463e-05	0.000203616
463	3	45844192	47588461	3162	205	LTL	0.000144173	1.20508e-09
464	3	47588462	50387742	2608	171	LTL	0.000170704	1.53831e-13
465	3	50387743	51953968	1770	121	LTL	9.08564e-05	5.8296e-07
466	3	51953969	54074844	3248	280	LTL	7.82741e-05	0.00103404
467	3	54074845	54892586	1823	257	LTL	6.73612e-05	0.00268394
468	3	54892587	55616625	1849	252	LTL	2.25839e-05	0.156105
469	3	55616626	56954878	3119	226	LTL	4.18721e-06	0.409895
470	3	56954879	58557718	3386	217	LTL	3.87053e-05	0.0362619
471	3	58557719	59998583	3191	296	LTL	7.12338e-05	0.00290799
472	3	59998584	60571139	2034	250	LTL	1.18639e-05	0.289752
473	3	60571140	61277587	1858	213	LTL	2.07871e-05	0.155794
474	3	61277588	62609818	2809	331	LTL	6.70056e-05	0.00654654
475	3	62609819	63670803	3067	271	LTL	8.65311e-05	0.000310958
476	3	63670804	64662373	1912	261	LTL	1.78253e-05	0.213295
478	3	65326752	66702084	2904	311	LTL	6.30821e-05	0.00795085
481	3	68319771	69784969	3483	277	LTL	8.3914e-05	0.000488057
482	3	69784970	71223281	2339	265	LTL	0.000111062	7.74092e-06
483	3	71223282	72334704	2570	335	LTL	0.000113178	3.1919e-05
484	3	72334705	73606612	2578	313	LTL	0.000189661	4.55493e-11
485	3	73606613	74383137	1974	233	LTL	9.11527e-06	0.326619
486	3	74383138	75374967	1775	143	LTL	4.85092e-05	0.00409624
488	3	76157471	77507832	3155	257	LTL	7.09862e-05	0.00174377
489	3	77507833	79023360	2830	235	LTL	4.86029e-06	0.399662
490	3	79023361	80385708	2384	168	LTL	1.55857e-05	0.193633
491	3	80385709	81431496	2264	129	LTL	5.72961e-06	0.34668
492	3	81431497	82532742	1790	153	LTL	3.73985e-05	0.0211903
493	3	82532743	83529394	1949	112	LTL	4.77837e-05	0.00199148
494	3	83529395	84698480	2633	125	LTL	2.07324e-07	0.47794
495	3	84698481	85807679	2551	132	LTL	1.16177e-05	0.230107
498	3	87411259	88375763	1990	131	LTL	4.0032e-05	0.0105296
499	3	88375764	89612939	2486	146	LTL	1.91459e-05	0.131869
501	3	94250145	95088587	1727	97	LTL	4.89787e-06	0.346445
503	3	96055533	97351955	1679	143	LTL	2.99479e-05	0.0440569
504	3	97351956	98212868	2172	150	LTL	2.82015e-05	0.0570785
505	3	98212869	99045104	2029	155	LTL	2.51308e-05	0.080866
507	3	100552523	101906989	2732	199	LTL	0.000121755	8.82015e-08
509	3	103450272	104116563	1961	145	LTL	3.08124e-05	0.0409377
510	3	104116564	104878977	2061	145	LTL	1.3828e-05	0.203431
511	3	104878978	106174685	3056	237	LTL	8.60802e-05	0.000159748
512	3	106174686	107736519	2976	275	LTL	3.21496e-05	0.0878756
513	3	107736520	108638900	1899	155	LTL	6.95853e-06	0.33407
518	3	112408514	113657665	2958	232	LTL	8.17758e-05	0.000263457
519	3	113657666	115649909	3321	317	LTL	3.11197e-05	0.109643
520	3	115649910	116498570	1867	176	LTL	4.62718e-05	0.0101311
521	3	116498571	117241644	1869	229	LTL	4.96811e-05	0.0135275
522	3	117241645	118086929	2015	159	LTL	3.06046e-05	0.048466
523	3	118086930	118903053	1814	154	LTL	4.20194e-05	0.0121914
524	3	118903054	119759983	1897	175	LTL	9.15975e-06	0.301995
525	3	119759984	120574477	1891	184	LTL	1.99402e-05	0.148613
526	3	120574478	121362442	1622	90	LTL	1.2869e-05	0.166122
527	3	121362443	122340832	2127	164	LTL	3.04788e-05	0.0514537
528	3	122340833	123518507	2379	248	LTL	2.26655e-05	0.153453
531	3	125475723	125992650	1670	118	LTL	2.5479e-06	0.417359
532	3	125992651	127495173	3618	292	LTL	0.000128853	1.03603e-06
533	3	127495174	129091975	2962	236	LTL	0.000185118	1.16277e-12
535	3	130242361	131373470	1881	165	LTL	5.90003e-06	0.359857
536	3	131373471	132124018	2322	157	LTL	1.10663e-05	0.257787
537	3	132124019	132925967	1791	148	LTL	8.21061e-06	0.305346
538	3	132925968	133718493	1823	233	LTL	0.000125916	1.96873e-07
539	3	133718494	135288394	3274	290	LTL	4.39165e-05	0.0381403
540	3	135288395	137372141	3041	217	LTL	7.52276e-06	0.348154
541	3	137372142	138693846	2012	202	LTL	3.85235e-05	0.0324328
542	3	138693847	139831267	2307	223	LTL	9.15408e-05	4.8731e-05
543	3	139831268	141034637	2455	259	LTL	0.000100566	3.28024e-05
544	3	141034638	141898978	1926	213	LTL	0.000107537	2.40668e-06
545	3	141898979	142976707	1951	201	LTL	5.82237e-05	0.00341184
546	3	142976708	144408821	3156	272	LTL	6.76534e-05	0.0031877
547	3	144408822	145211907	1899	137	LTL	7.53658e-06	0.312401
548	3	145211908	145903838	1986	156	LTL	2.1747e-05	0.111228
549	3	145903839	147358243	3368	234	LTL	3.95559e-05	0.038244
550	3	147358244	148638308	2914	276	LTL	6.54433e-05	0.00428373
551	3	148638309	149998411	3262	297	LTL	0.000119864	4.91865e-06
552	3	149998412	151131307	2230	252	LTL	9.36015e-05	7.69609e-05
553	3	151131308	151904021	1873	162	LTL	5.57286e-05	0.00222098
554	3	151904022	153406718	3135	247	LTL	8.71095e-06	0.337677
555	3	153406719	155046423	3488	231	LTL	2.52025e-05	0.121514
556	3	155046424	155928190	1836	142	LTL	9.47349e-06	0.277059
557	3	155928191	156795410	1865	167	LTL	1.5648e-05	0.192082
558	3	156795411	157633700	1872	152	LTL	8.51433e-05	1.12295e-05
559	3	157633701	158460058	1833	88	LTL	2.39886e-06	0.409018
560	3	158460059	159478751	1779	204	LTL	9.01895e-05	3.39617e-05
561	3	159478752	160584961	2013	163	LTL	0.000177458	1.12535e-14
562	3	160584962	161628883	2470	128	LTL	6.45901e-05	0.000185901
563	3	161628884	162622604	3064	130	LTL	2.607e-05	0.0586464
565	3	163250113	164037360	2056	92	LTL	4.59948e-05	0.00132084
566	3	164037361	165054911	1916	140	LTL	1.79771e-05	0.141211
567	3	165054912	165936511	2189	126	LTL	2.08099e-05	0.0983256
568	3	165936512	167118893	3353	135	LTL	3.00056e-05	0.0398647
569	3	167118894	168972662	3456	274	LTL	0.00022071	5.72551e-15
570	3	168972663	170174578	2292	238	LTL	0.00280127	0
571	3	170174579	171134849	1880	237	LTL	0.000317682	1.11335e-27
572	3	171134850	172004760	1851	233	LTL	7.36695e-05	0.000819272
573	3	172004761	173415591	2944	299	LTL	2.81915e-05	0.125122
574	3	173415592	174684707	2760	249	LTL	2.63039e-05	0.120292
575	3	174684708	175671424	2547	248	LTL	5.50916e-05	0.00941047
576	3	175671425	176931163	3060	243	LTL	8.95732e-05	0.000111177
577	3	176931164	178110322	2418	270	LTL	4.45298e-05	0.0317898
578	3	178110323	179372165	2549	226	LTL	0.000111126	2.10475e-06
579	3	179372166	181424323	3057	262	LTL	6.76524e-05	0.00278453
580	3	181424324	183203155	2895	304	LTL	4.45087e-06	0.417878
581	3	183203156	184524268	3103	325	LTL	0.000146546	1.68861e-07
582	3	184524269	185709996	2113	181	LTL	4.75808e-05	0.00931198
583	3	185709997	186602045	1928	293	LTL	8.4935e-05	0.000564903
584	3	186602046	187939199	3290	345	LTL	0.000109959	5.96258e-05
585	3	187939200	189451805	3346	328	LTL	8.26334e-05	0.00124024
586	3	189451806	190591293	3226	284	LTL	8.04923e-05	0.000841521
587	3	190591294	191229357	1870	144	LTL	4.37131e-06	0.383916
588	3	191229358	192049688	2460	182	LTL	3.73412e-06	0.409029
589	3	192049689	193122090	2446	262	LTL	1.00834e-05	0.320725
590	3	193122091	194217140	2818	323	LTL	3.54345e-05	0.0842162
591	3	194217141	195196789	3303	296	LTL	5.6899e-05	0.0125888
592	3	195196790	195710290	840	166	LTL	6.24041e-05	0.000912738
593	3	195710291	196383152	1688	237	LTL	5.93511e-05	0.0051409
594	3	196383153	197147990	1792	233	LTL	0.000187972	4.86187e-13
595	3	197147991	197962380	1292	160	LTL	0.000190396	2.30969e-16
596	4	10227	812415	1574	138	LTL	2.54792e-05	0.0676786
597	4	812416	1529267	1807	173	LTL	1.89044e-05	0.153683
598	4	1529268	2468935	1980	236	LTL	0.000158953	3.45787e-10
599	4	2468936	3549229	2334	226	LTL	3.72731e-05	0.0443483
601	4	4266179	5051834	2297	271	LTL	5.96633e-05	0.00749465
602	4	5051835	5972709	2987	304	LTL	2.79838e-05	0.128643
603	4	5972710	7135819	3249	370	LTL	0.000175463	6.45294e-09
604	4	7135820	7726034	2485	352	LTL	6.39265e-05	0.0104341
605	4	7726035	8309826	1885	275	LTL	8.53342e-05	0.000392181
606	4	8309827	8882616	1406	195	LTL	4.36124e-05	0.017724
607	4	8882617	9482867	408	21	LTL	2.27904e-05	0.00242149
608	4	9482868	9916156	1416	82	LTL	5.31788e-05	0.000190438
609	4	9916157	10370666	1652	88	LTL	8.66847e-05	1.01287e-07
610	4	10370667	11050119	1780	180	LTL	9.295e-05	8.83102e-06
611	4	11050120	12209028	3235	260	LTL	0.000106167	1.43705e-05
612	4	12209029	13127576	2606	203	LTL	7.30309e-05	0.000471481
613	4	13127577	14395886	3404	288	LTL	5.93986e-05	0.00917145
614	4	14395887	14967147	1758	151	LTL	7.81603e-06	0.314848
615	4	14967148	15910801	2162	197	LTL	6.02687e-05	0.00243684
616	4	15910802	17290236	3353	317	LTL	7.8031e-05	0.00179314
617	4	17290237	18753263	3307	233	LTL	6.98934e-05	0.00134126
618	4	18753264	20086838	3580	193	LTL	8.27243e-05	8.11113e-05
620	4	21416381	22835185	3480	246	LTL	1.94197e-05	0.187647
621	4	22835186	23858350	1897	220	LTL	1.51395e-05	0.229606
622	4	23858351	24764724	1928	257	LTL	6.5741e-05	0.00323948
623	4	24764725	25832018	2712	287	LTL	4.41858e-05	0.0366174
624	4	25832019	27385580	2738	320	LTL	9.80554e-05	0.000173727
625	4	27385581	28177792	2370	188	LTL	1.13385e-05	0.270993
626	4	28177793	28927438	2087	133	LTL	4.72574e-05	0.00389691
627	4	28927439	29758399	2099	162	LTL	3.09274e-05	0.0482388
628	4	29758400	30455555	1957	149	LTL	1.36723e-05	0.20888
629	4	30455556	31395092	2575	185	LTL	5.25797e-05	0.00533122
630	4	31395093	32260117	2233	157	LTL	3.38084e-05	0.0336539
631	4	32260118	32746820	1726	116	LTL	4.40032e-06	0.370668
632	4	32746821	33640822	1735	101	LTL	1.33427e-05	0.170993
634	4	34721846	35411236	1619	154	LTL	3.06872e-05	0.0457197
635	4	35411237	35993838	2172	101	LTL	1.39533e-05	0.161119
637	4	36671802	37880860	3672	270	LTL	7.05443e-05	0.00222832
638	4	37880861	38984838	3083	295	LTL	0.000128666	1.1724e-06
639	4	38984839	39820061	1795	176	LTL	5.92395e-05	0.00183752
640	4	39820062	40590541	1895	250	LTL	0.000118402	1.44103e-06
641	4	40590542	41360937	1978	207	LTL	2.50565e-05	0.110862
642	4	41360938	42189251	1858	165	LTL	4.40888e-05	0.0111999
643	4	42189252	43192424	3043	199	LTL	5.5821e-05	0.00446836
645	4	43962562	45186767	3374	189	LTL	3.45066e-05	0.0429786
646	4	45186768	46358360	2119	179	LTL	3.57065e-05	0.0346988
647	4	46358361	47408265	1749	186	LTL	3.86883e-05	0.0272651
648	4	47408266	49325138	3004	218	LTL	5.86803e-05	0.00424022
649	4	49325139	53879571	1341	116	LTL	1.46038e-05	0.166488
650	4	53879572	54659778	1677	159	LTL	4.33233e-05	0.0112092
651	4	54659779	55681701	1933	243	LTL	0.000132188	9.53706e-08
652	4	55681702	57103100	3609	270	LTL	2.84135e-05	0.112144
653	4	57103101	58011085	2530	239	LTL	0.000103188	1.23772e-05
654	4	58011086	58940256	2395	221	LTL	1.57101e-06	0.457581
655	4	58940257	59692948	2058	145	LTL	5.2392e-05	0.00242528
656	4	59692949	60746709	2782	176	LTL	2.08413e-05	0.133698
657	4	60746710	61971161	3450	181	LTL	3.48997e-05	0.0384401
658	4	61971162	63337954	2642	243	LTL	9.74301e-05	3.4348e-05
659	4	63337955	64117431	2135	152	LTL	3.58266e-05	0.0251673
660	4	64117432	65563100	3477	175	LTL	1.49564e-05	0.207212
661	4	65563101	66597446	2678	180	LTL	2.39172e-06	0.436011
662	4	66597447	67616362	2348	167	LTL	1.64563e-05	0.180883
664	4	68742860	69603368	1511	110	LTL	1.54456e-05	0.148125
665	4	69603369	70516836	2846	89	LTL	1.7288e-05	0.101312
666	4	70516837	71468300	2820	152	LTL	5.2719e-05	0.00273126
667	4	71468301	73258294	2993	215	LTL	7.24925e-05	0.000666942
668	4	73258295	74885900	2936	206	LTL	2.30507e-05	0.1287
669	4	74885901	76497358	3327	246	LTL	7.9563e-05	0.00048148
670	4	76497359	78045637	3680	256	LTL	0.000111721	5.31048e-06
671	4	78045638	78967715	2173	170	LTL	7.45508e-05	0.000149454
672	4	78967716	79880101	1853	160	LTL	3.60991e-05	0.0269801
673	4	79880102	81206182	2649	210	LTL	5.4313e-05	0.00635312
674	4	81206183	82655623	2548	216	LTL	5.59081e-06	0.382186
675	4	82655624	84003062	3079	240	LTL	6.94157e-05	0.00160812
676	4	84003063	85437805	2714	253	LTL	3.63749e-05	0.056987
677	4	85437806	86931670	3075	187	LTL	2.63407e-05	0.0898135
678	4	86931671	88502717	3136	194	LTL	4.09021e-05	0.0234743
679	4	88502718	89244554	1995	181	LTL	9.2884e-05	9.30702e-06
680	4	89244555	90236971	2069	211	LTL	7.05065e-06	0.354518
681	4	90236972	91309863	2314	175	LTL	5.01137e-05	0.00616455
682	4	91309864	92219192	2176	201	LTL	8.6757e-06	0.322249
683	4	92219193	93451599	2143	185	LTL	3.49577e-05	0.0396617
684	4	93451600	94757265	2492	200	LTL	8.56101e-06	0.323855
685	4	94757266	96183801	3000	235	LTL	4.53069e-05	0.0224018
686	4	96183802	97540787	3456	236	LTL	1.1315e-05	0.292788
687	4	97540788	98445515	1853	153	LTL	7.50056e-06	0.322194
688	4	98445516	99532480	2044	110	LTL	2.18486e-06	0.423948
690	4	100333335	101132995	1829	158	LTL	6.42302e-05	0.000552252
691	4	101132996	102544803	3235	225	LTL	2.70317e-05	0.103414
692	4	102544804	104384534	3292	246	LTL	0.000110028	5.08815e-06
694	4	105319196	106479155	2177	183	LTL	5.42067e-05	0.00417717
695	4	106479156	108131206	2985	231	LTL	4.23194e-05	0.0288768
696	4	108131207	109122458	1849	197	LTL	3.65425e-05	0.0377284
697	4	109122459	109978982	1963	202	LTL	2.99558e-05	0.0720606
698	4	109978983	111733579	3424	297	LTL	0.000122623	3.21999e-06
699	4	111733580	112830229	1960	197	LTL	5.32774e-05	0.00592982
700	4	112830230	113916002	1981	186	LTL	4.34162e-05	0.0162526
701	4	113916003	115306149	2961	271	LTL	3.61982e-05	0.0636936
702	4	115306150	116204703	1942	142	LTL	4.30072e-06	0.384712
703	4	116204704	117313636	2382	148	LTL	2.0975e-05	0.1134
704	4	117313637	118395262	2738	183	LTL	6.00662e-06	0.364459
705	4	118395263	119138097	1781	129	LTL	6.68777e-06	0.325521
706	4	119138098	119927262	1608	131	LTL	4.70644e-05	0.00381945
708	4	120563074	121393008	1866	149	LTL	2.32851e-05	0.0921881
710	4	121981244	122655434	2091	187	LTL	5.80277e-05	0.00271664
711	4	122655435	123768693	1973	176	LTL	9.05541e-05	1.15853e-05
712	4	123768694	124534997	1862	143	LTL	4.30183e-05	0.00882634
714	4	125486536	126476842	2506	196	LTL	2.03636e-05	0.151012
715	4	126476843	127279171	1964	191	LTL	4.6554e-05	0.0121105
716	4	127279172	128321876	2332	169	LTL	2.09906e-05	0.127621
719	4	131098951	131873453	1953	157	LTL	2.14827e-05	0.114544
723	4	134109979	135809542	3452	211	LTL	3.3195e-05	0.0575107
724	4	135809543	137400031	3420	224	LTL	2.22834e-05	0.145734
725	4	137400032	138537344	3488	240	LTL	2.58283e-05	0.120285
726	4	138537345	139553760	2381	215	LTL	5.29874e-05	0.00794465
727	4	139553761	141087047	2889	322	LTL	0.000108659	4.48895e-05
728	4	141087048	142807914	3315	280	LTL	2.02703e-05	0.192716
730	4	144401043	146174871	2566	196	LTL	9.61704e-05	9.30688e-06
731	4	146174872	147161042	1909	238	LTL	9.27622e-05	6.10543e-05
732	4	147161043	148462208	2407	179	LTL	1.08369e-05	0.274647
733	4	148462209	149998528	2805	262	LTL	5.64551e-05	0.00949668
734	4	149998529	151014322	1641	173	LTL	4.73632e-05	0.00845045
735	4	151014323	152162098	1747	140	LTL	2.15211e-05	0.102116
736	4	152162099	153520883	2713	222	LTL	5.34901e-05	0.00822035
737	4	153520884	155044409	3534	325	LTL	1.78947e-07	0.486764
738	4	155044410	156520288	3068	275	LTL	8.97683e-05	0.00021877
739	4	156520289	157597309	3334	242	LTL	8.12014e-05	0.000355259
740	4	157597310	159176073	3152	229	LTL	2.13617e-06	0.44788
744	4	162239290	163245541	2806	200	LTL	3.37075e-05	0.0507184
745	4	163245542	163937103	1767	138	LTL	1.87037e-05	0.130833
746	4	163937104	164781847	1741	192	LTL	0.000961514	1.26914e-137
747	4	164781848	165824650	2913	228	LTL	0.000115787	1.00091e-06
748	4	165824651	166702855	2336	220	LTL	6.8105e-05	0.00133458
749	4	166702856	167643768	2263	170	LTL	5.42944e-05	0.00322448
750	4	167643769	168623790	2356	185	LTL	2.52066e-05	0.0977841
751	4	168623791	169555114	2372	190	LTL	2.43211e-05	0.108143
752	4	169555115	170682809	2109	225	LTL	9.26374e-06	0.321384
753	4	170682810	171643019	2564	175	LTL	1.41966e-05	0.218435
754	4	171643020	172555990	2408	136	LTL	4.37242e-05	0.00696654
755	4	172555991	174470206	3164	277	LTL	4.27065e-05	0.0389337
756	4	174470207	175295842	1763	243	LTL	3.91173e-05	0.0424076
757	4	175295843	175959697	1872	188	LTL	2.65811e-05	0.0885041
758	4	175959698	177129678	2492	249	LTL	9.64091e-05	4.70969e-05
759	4	177129679	178314527	3116	277	LTL	8.1931e-05	0.00062721
760	4	178314528	179233905	2107	210	LTL	2.14195e-05	0.147382
761	4	179233906	179932391	1873	178	LTL	1.95276e-06	0.444793
762	4	179932392	180540877	2024	168	LTL	3.37202e-05	0.0382436
763	4	180540878	181122433	1928	193	LTL	1.46877e-05	0.221852
764	4	181122434	182065646	2826	299	LTL	2.73502e-05	0.131952
765	4	182065647	182946258	2885	303	LTL	9.79452e-05	0.000128249
766	4	182946259	183603892	1877	274	LTL	0.000115058	5.38284e-06
767	4	183603893	184338584	1901	257	LTL	4.42095e-05	0.0297748
768	4	184338585	185483262	3304	354	LTL	0.000132244	3.41626e-06
769	4	185483263	186232882	2201	257	LTL	0.000114679	3.3918e-06
770	4	186232883	186881568	1842	272	LTL	4.16599e-05	0.0411992
771	4	186881569	187985393	3141	335	LTL	0.000127196	4.45293e-06
772	4	187985394	189153279	3277	315	LTL	7.14498e-05	0.00355274
773	4	189153280	189899573	3262	256	LTL	5.34742e-05	0.0121165
774	4	189899574	191043880	2231	225	LTL	3.91551e-05	0.0370527
775	5	10043	598320	1602	158	LTL	0.000131761	7.21992e-10
776	5	598321	1206609	1207	202	LTL	0.000524986	1.01844e-60
777	5	1206610	2106885	2953	320	LTL	0.00354678	0
778	5	2106886	2960068	2838	322	LTL	9.70367e-05	0.000204712
779	5	2960069	3677595	2856	278	LTL	5.91106e-05	0.0085427
780	5	3677596	4636542	2114	256	LTL	9.01173e-05	0.000139366
781	5	4636543	5828694	3258	329	LTL	0.000123126	6.93532e-06
782	5	5828695	6936733	3501	303	LTL	3.35074e-05	0.0891893
783	5	6936734	8079415	3034	254	LTL	7.78295e-05	0.000704334
784	5	8079416	9203855	3277	226	LTL	1.99986e-05	0.17134
785	5	9203856	10549029	3245	339	LTL	0.000107876	6.97594e-05
786	5	10549030	11850850	3106	304	LTL	9.42652e-05	0.000211133
787	5	11850851	12867189	1879	124	LTL	7.2855e-05	3.20935e-05
788	5	12867190	13608147	1882	128	LTL	2.67037e-05	0.0534664
789	5	13608148	14910295	2902	289	LTL	0.000146695	4.59689e-08
790	5	14910296	16592319	2854	277	LTL	2.16934e-05	0.176131
791	5	16592320	17803477	2751	324	LTL	9.94715e-05	0.000155875
793	5	18791411	20397013	3268	211	LTL	8.80732e-06	0.323875
794	5	20397014	21211399	1598	126	LTL	8.16515e-05	5.93771e-06
795	5	21211400	22149042	1499	150	LTL	2.02603e-05	0.122372
796	5	22149043	23246745	2302	180	LTL	1.89757e-05	0.157323
798	5	24362662	25722097	2866	237	LTL	7.09842e-05	0.00125195
799	5	25722098	26938178	3395	207	LTL	1.09502e-05	0.286501
800	5	26938179	28315653	2660	231	LTL	4.4125e-05	0.0242593
801	5	28315654	29593755	3175	184	LTL	1.7629e-05	0.176427
802	5	29593756	30416066	2785	159	LTL	3.39458e-05	0.0339064
803	5	30416067	31679464	2973	284	LTL	7.71236e-05	0.00126189
804	5	31679465	32727914	2650	314	LTL	8.60267e-05	0.000689429
805	5	32727915	33971056	2936	246	LTL	4.46972e-05	0.0261123
806	5	33971057	35157146	2748	239	LTL	4.57251e-05	0.0222918
807	5	35157147	36431967	2903	220	LTL	5.3389e-05	0.0081036
808	5	36431968	37925487	2547	239	LTL	6.02407e-05	0.00476905
809	5	37925488	39438985	3079	288	LTL	4.28642e-05	0.0410881
810	5	39438986	40290851	2397	147	LTL	1.05911e-05	0.259645
811	5	40290852	41279590	2286	165	LTL	2.27234e-05	0.107761
812	5	41279591	42856332	2834	158	LTL	2.72818e-05	0.0672204
813	5	42856333	44049878	2316	143	LTL	6.82124e-05	0.000173435
814	5	44049879	45305566	1783	134	LTL	2.45186e-05	0.0720761
815	5	45305567	46388848	1559	61	LTL	1.36961e-05	0.110966
816	5	46388849	50164835	1278	57	LTL	1.02811e-06	0.437034
817	5	50164836	51203265	1813	169	LTL	5.77789e-05	0.00193755
818	5	51203266	52139773	2170	171	LTL	1.06249e-05	0.273889
819	5	52139774	52837225	1884	160	LTL	3.47142e-06	0.4088
820	5	52837226	53747856	2244	217	LTL	6.03853e-05	0.00339006
821	5	53747857	55221398	3672	236	LTL	9.54615e-05	3.82923e-05
822	5	55221399	55968966	1953	265	LTL	4.2997e-05	0.035111
823	5	55968967	56896890	1986	216	LTL	6.55069e-05	0.00174123
824	5	56896891	57895012	2424	191	LTL	3.76922e-05	0.0318081
825	5	57895013	58721458	2178	219	LTL	7.42088e-05	0.000572458
826	5	58721459	59868567	1829	186	LTL	1.24525e-05	0.251882
827	5	59868568	60930753	1771	129	LTL	1.11728e-05	0.235668
828	5	60930754	62180368	2114	201	LTL	5.01418e-05	0.00914016
829	5	62180369	63214089	2469	169	LTL	7.63322e-06	0.327501
830	5	63214090	64438518	1818	179	LTL	1.86041e-05	0.16116
831	5	64438519	65606870	2044	188	LTL	3.55442e-06	0.414025
833	5	67096192	68006993	2046	254	LTL	9.46474e-05	6.93815e-05
834	5	68006994	71468651	3066	249	LTL	0.000128878	2.23492e-07
835	5	71468652	73314061	3503	288	LTL	6.14387e-05	0.00747033
836	5	73314062	74245354	2122	250	LTL	4.1995e-05	0.0345147
838	5	75239303	75959515	1751	232	LTL	8.51961e-05	0.000161085
839	5	75959516	77290255	3149	306	LTL	3.0768e-05	0.108305
840	5	77290256	79005158	3197	270	LTL	8.29113e-05	0.000489319
841	5	79005159	80448225	3438	300	LTL	6.74318e-05	0.00457718
842	5	80448226	81710194	2068	238	LTL	7.11674e-05	0.00124477
843	5	81710195	82720248	2076	237	LTL	3.02268e-06	0.432751
844	5	82720249	84094797	2402	290	LTL	0.000101066	6.41672e-05
845	5	84094798	84697850	1878	125	LTL	1.26948e-06	0.451263
847	5	85311780	86493763	2433	202	LTL	2.95321e-07	0.480896
849	5	87943483	89584466	1949	258	LTL	8.92458e-05	0.000164632
850	5	89584467	90793804	2025	219	LTL	7.01994e-05	0.000990793
851	5	90793805	91956905	1832	176	LTL	4.17686e-05	0.0172712
852	5	91956906	93814604	2204	252	LTL	6.99508e-06	0.367091
853	5	93814605	95117259	2350	254	LTL	3.88846e-05	0.0465096
855	5	96467378	97316601	2366	113	LTL	1.44406e-05	0.166049
856	5	97316602	98567769	2693	197	LTL	4.86419e-05	0.0103056
857	5	98567770	99257995	1561	87	LTL	2.01854e-05	0.0693429
858	5	99257996	100594081	2349	136	LTL	3.55087e-05	0.0208332
859	5	100594082	101575367	2363	131	LTL	4.35253e-05	0.00643615
860	5	101575368	102903985	2478	151	LTL	5.17672e-05	0.00306468
861	5	102903986	103788460	1866	232	LTL	0.000101537	1.29905e-05
863	5	104850491	106389388	3087	235	LTL	3.54007e-05	0.0555038
864	5	106389389	107265911	2027	244	LTL	0.000108079	6.56119e-06
865	5	107265912	108641784	3248	204	LTL	1.94298e-05	0.1662
866	5	108641785	109606905	2385	207	LTL	2.58537e-05	0.10413
867	5	109606906	110819517	2118	157	LTL	3.55448e-05	0.0276976
868	5	110819518	111983115	2790	224	LTL	1.50542e-05	0.232724
869	5	111983116	113121555	3147	186	LTL	4.87622e-06	0.387395
870	5	113121556	113998532	2242	198	LTL	1.02333e-05	0.294268
871	5	113998533	115117631	2586	213	LTL	3.45777e-05	0.0515266
872	5	115117632	116208000	3186	283	LTL	6.08695e-05	0.00751762
874	5	117348498	118605251	3050	243	LTL	6.87505e-05	0.00183525
876	5	119664174	120371857	1824	142	LTL	1.51751e-05	0.180667
877	5	120371858	120960737	1975	157	LTL	8.81584e-06	0.298805
878	5	120960738	122005291	1855	217	LTL	5.09911e-05	0.0102139
880	5	123191942	124109485	1990	249	LTL	2.45844e-05	0.135439
881	5	124109486	125131720	2580	277	LTL	3.68877e-05	0.0622379
882	5	125131721	126054697	2544	214	LTL	2.28957e-05	0.134461
883	5	126054698	126992836	2148	163	LTL	6.47705e-05	0.000584877
884	5	126992837	128067414	1947	156	LTL	4.06308e-06	0.394881
885	5	128067415	128734905	2057	134	LTL	2.46716e-05	0.0709319
886	5	128734906	130573817	2844	169	LTL	1.95854e-05	0.143082
887	5	130573818	132554690	2728	198	LTL	0.000119984	1.19039e-07
888	5	132554691	134556570	3663	343	LTL	9.33147e-05	0.000450558
889	5	134556571	135344943	1995	219	LTL	2.53316e-05	0.11456
890	5	135344944	136949853	3053	248	LTL	5.85936e-05	0.00644672
891	5	136949854	139408116	2975	264	LTL	0.00014106	4.59408e-08
892	5	139408117	141253830	2974	261	LTL	9.83467e-05	4.79831e-05
893	5	141253831	142532956	2908	306	LTL	0.000116652	1.00777e-05
894	5	142532957	143605908	2183	221	LTL	7.69397e-05	0.000407802
895	5	143605909	145319096	3343	216	LTL	4.6308e-05	0.0167762
896	5	145319097	147180171	3604	287	LTL	0.000125427	1.53759e-06
897	5	147180172	148662214	3181	268	LTL	7.51732e-06	0.362539
898	5	148662215	149850203	2534	314	LTL	4.22578e-05	0.0496335
899	5	149850204	150981934	2777	254	LTL	8.096e-05	0.000467598
900	5	150981935	151892617	2004	162	LTL	6.31653e-05	0.000730551
901	5	151892618	152878627	1976	152	LTL	6.57179e-05	0.000361416
902	5	152878628	153734494	2197	162	LTL	4.21302e-05	0.0136193
903	5	153734495	154599750	1852	228	LTL	7.41535e-05	0.000695766
904	5	154599751	155459556	1903	189	LTL	5.94271e-06	0.367721
905	5	155459557	156345451	1883	161	LTL	3.83414e-05	0.021119
906	5	156345452	157191081	2187	180	LTL	3.58376e-05	0.0345712
907	5	157191082	158484775	2807	246	LTL	6.06494e-05	0.00499717
908	5	158484776	159663733	2613	272	LTL	4.97417e-05	0.0201515
909	5	159663734	160519049	2049	230	LTL	7.41547e-05	0.000724074
910	5	160519050	161478177	2091	159	LTL	6.24629e-06	0.350338
911	5	161478178	162386027	1717	197	LTL	1.94073e-05	0.162486
912	5	162386028	163781268	3211	281	LTL	2.60634e-05	0.13586
913	5	163781269	165289211	3183	283	LTL	4.46933e-05	0.0342075
914	5	165289212	166863413	2935	322	LTL	5.726e-05	0.0150499
915	5	166863414	168342743	2976	344	LTL	0.000112387	4.25587e-05
916	5	168342744	169506966	3088	296	LTL	0.000110947	1.8089e-05
917	5	169506967	170898340	3133	317	LTL	2.68772e-05	0.142558
918	5	170898341	172285682	3219	353	LTL	0.000114297	3.94611e-05
919	5	172285683	173606995	3236	320	LTL	0.000129912	2.00374e-06
920	5	173606996	174662885	2898	329	LTL	0.000104312	9.17462e-05
921	5	174662886	176180301	2641	317	LTL	5.70022e-05	0.014821
922	5	176180302	177659902	2345	254	LTL	0.000117755	1.84639e-06
923	5	177659903	178595252	3004	288	LTL	5.13065e-05	0.0198204
924	5	178595253	179794710	3026	339	LTL	2.81653e-05	0.139515
925	5	179794711	180902886	2193	249	LTL	7.93713e-05	0.000523907
926	6	63979	1380679	3270	344	LTL	0.000231501	5.41737e-14
927	6	1380680	2746531	3315	336	LTL	4.80068e-05	0.0357405
928	6	2746532	3964072	3187	331	LTL	5.75121e-05	0.0157414
929	6	3964073	4657086	1961	197	LTL	1.41603e-05	0.231763
931	6	5378214	6621937	3401	347	LTL	9.13642e-05	0.000598146
932	6	6621938	7808323	3313	337	LTL	9.11162e-05	0.00053335
933	6	7808324	9020710	3206	243	LTL	6.64239e-05	0.00243788
934	6	9020711	10416550	3267	280	LTL	0.000117164	4.61258e-06
935	6	10416551	11790671	3295	319	LTL	0.000141845	2.98608e-07
936	6	11790672	13352326	3489	304	LTL	8.57938e-05	0.000607602
937	6	13352327	15069421	3279	327	LTL	3.89929e-05	0.0668911
938	6	15069422	16566882	3559	303	LTL	9.08108e-05	0.000321816
939	6	16566883	17391994	1848	250	LTL	7.63861e-05	0.000789122
940	6	17391995	18208676	1915	177	LTL	4.55549e-06	0.391131
942	6	18775023	19449152	1840	118	LTL	6.84202e-06	0.314918
943	6	19449153	20418020	2340	288	LTL	5.00143e-05	0.0222714
944	6	20418021	21295864	2107	204	LTL	3.53099e-05	0.0450275
945	6	21295865	22199713	1883	272	LTL	6.16108e-05	0.00617384
946	6	22199714	23192337	2695	223	LTL	3.76816e-05	0.0418029
947	6	23192338	23939306	2125	241	LTL	6.18948e-05	0.00404902
948	6	23939307	24950379	2819	255	LTL	0.000210729	1.352e-14
949	6	24950380	25684629	2286	200	LTL	0.000243934	1.11481e-20
950	6	25684630	26396200	1782	121	LTL	0.000135267	8.50315e-12
951	6	26396201	27261035	1351	86	LTL	0.000105678	4.43024e-10
952	6	27261036	28666364	2711	116	LTL	0.000158917	5.20899e-15
953	6	28666365	29529755	2129	77	LTL	0.00021342	1.176e-26
954	6	29529756	29833843	2341	53	LTL	0.000195047	3.85283e-27
955	6	29833844	30070717	1628	39	LTL	0.000194048	1.28254e-29
956	6	30070718	30715006	2206	87	LTL	0.000245639	1.43957e-30
957	6	30715007	31106493	2083	102	LTL	0.000292915	2.91688e-36
958	6	31106494	31250556	1555	37	LTL	0.000240695	7.70382e-39
959	6	31250557	31320268	1074	24	LTL	0.000227157	6.33728e-40
960	6	31320269	31427209	1403	39	LTL	0.000221162	1.18088e-34
961	6	31427210	32208901	2102	157	LTL	0.000428966	4.76591e-51
962	6	32208902	32454577	1831	45	LTL	0.000179017	9.9823e-26
963	6	32454578	32539567	2	2	LTL	2.04875e-06	0.131531
964	6	32539568	32586784	304	36	LTL	0.000253986	1.18491e-41
965	6	32586785	32629239	361	85	LTL	0.000792739	1.20651e-132
966	6	32629240	32682213	612	26	LTL	0.000149078	3.60329e-24
967	6	32682214	32897998	1577	62	LTL	0.000263677	1.26821e-37
968	6	32897999	33194975	1885	105	LTL	0.000152456	6.78503e-15
969	6	33194976	33864262	1825	184	LTL	8.00514e-05	9.45708e-05
970	6	33864263	34979270	2359	226	LTL	5.13137e-05	0.0109822
971	6	34979271	36346353	2525	229	LTL	5.66933e-05	0.00626114
972	6	36346354	37570051	2909	291	LTL	0.000126876	1.37969e-06
973	6	37570052	38688720	2484	247	LTL	3.42954e-05	0.0652531
974	6	38688721	39785907	2982	258	LTL	4.78036e-06	0.405449
975	6	39785908	40778401	2691	239	LTL	2.6315e-05	0.115709
976	6	40778402	42103738	2934	315	LTL	0.000108071	4.19589e-05
977	6	42103739	43770626	2976	279	LTL	8.91307e-05	0.000257541
978	6	43770627	44596897	1978	306	LTL	8.20267e-05	0.000980376
980	6	45408422	46430701	2038	238	LTL	7.36674e-05	0.000900907
981	6	46430702	47313443	1942	219	LTL	4.23267e-05	0.0259725
982	6	47313444	48393981	2441	182	LTL	7.35844e-05	0.000251269
984	6	49528165	50940767	3034	176	LTL	4.44803e-05	0.0125737
986	6	51826424	52598879	1939	219	LTL	8.34135e-05	0.00015155
987	6	52598880	53425492	1906	205	LTL	4.22032e-05	0.022969
988	6	53425493	54452767	2271	192	LTL	4.85461e-05	0.00972923
989	6	54452768	55469137	3213	159	LTL	3.00696e-05	0.0512239
990	6	55469138	56200985	2083	138	LTL	8.11862e-05	1.23887e-05
991	6	56200986	57316157	1639	165	LTL	4.24091e-05	0.0137629
992	6	57316158	58141889	632	13	LTL	3.92938e-06	0.201821
993	6	58141890	61883560	1042	33	LTL	2.2969e-05	0.00736321
994	6	61883561	62693128	1129	33	LTL	1.8146e-05	0.0224478
995	6	62693129	64010286	2972	121	LTL	1.65103e-05	0.143926
999	6	67036788	67559694	1795	132	LTL	4.00296e-05	0.0107398
1000	6	67559695	68547494	3340	143	LTL	4.28907e-06	0.385357
1001	6	68547495	69294227	2446	159	LTL	3.99982e-05	0.0168854
1002	6	69294228	70363348	2494	153	LTL	6.59898e-05	0.000356725
1003	6	70363349	71610787	2696	232	LTL	1.0248e-05	0.307985
1006	6	73170169	74401506	2724	228	LTL	9.09383e-05	6.15571e-05
1008	6	75461314	77274030	2879	216	LTL	5.8995e-05	0.0039578
1009	6	77274031	78168731	2190	159	LTL	1.48825e-05	0.197637
1012	6	79859904	80693927	2007	192	LTL	1.56995e-05	0.206934
1013	6	80693928	81567706	2220	109	LTL	2.98471e-05	0.0278801
1014	6	81567707	82388204	2199	105	LTL	5.09786e-07	0.467617
1015	6	82388205	83571953	2482	205	LTL	5.38367e-05	0.0062526
1016	6	83571954	85038134	2208	204	LTL	3.04777e-05	0.0697424
1019	6	86818670	87516322	1800	135	LTL	1.35214e-05	0.200388
1020	6	87516323	88499745	2059	125	LTL	4.92857e-05	0.0023081
1021	6	88499746	89974267	3311	285	LTL	2.02225e-05	0.195253
1023	6	91097025	92015279	2102	218	LTL	9.10342e-05	4.56293e-05
1024	6	92015280	92953798	1969	189	LTL	2.02685e-05	0.147955
1025	6	92953799	93696825	1889	158	LTL	2.26472e-06	0.434568
1026	6	93696826	95176337	3311	245	LTL	2.47563e-05	0.132047
1027	6	95176338	96480153	2507	173	LTL	3.19667e-05	0.0480336
1028	6	96480154	98173003	3568	218	LTL	5.84354e-05	0.00436739
1029	6	98173004	99678876	2486	230	LTL	6.2659e-05	0.00314754
1030	6	99678877	100878645	2583	224	LTL	6.96494e-05	0.00117415
1031	6	100878646	101793542	1904	99	LTL	1.33921e-05	0.167952
1032	6	101793543	102637706	1823	190	LTL	5.4987e-05	0.00427033
1033	6	102637707	103612625	2021	141	LTL	5.40753e-05	0.00169232
1034	6	103612626	104209796	1884	98	LTL	2.0891e-05	0.0735611
1035	6	104209797	104951344	1855	151	LTL	7.06432e-06	0.329926
1036	6	104951345	106053915	1894	205	LTL	5.55404e-05	0.00508838
1037	6	106053916	107309327	3213	292	LTL	5.86998e-05	0.0102084
1038	6	107309328	109043244	3023	284	LTL	0.000108959	1.79325e-05
1039	6	109043245	110647842	3152	210	LTL	0.000139696	4.18981e-09
1040	6	110647843	111363443	1861	155	LTL	9.24363e-06	0.289584
1041	6	111363444	112342873	1861	175	LTL	2.32926e-05	0.10869
1042	6	112342874	113705003	2427	236	LTL	7.37944e-06	0.3564
1043	6	113705004	115062811	2461	214	LTL	3.04273e-05	0.0744417
1044	6	115062812	116132147	2441	128	LTL	3.97429e-07	0.47346
1045	6	116132148	117674076	3175	210	LTL	8.64563e-05	7.4352e-05
1046	6	117674077	118529071	1842	165	LTL	2.39481e-05	0.0967179
1047	6	118529072	119451294	2055	132	LTL	2.54121e-05	0.0643112
1048	6	119451295	120339244	2375	126	LTL	1.62197e-05	0.152386
1049	6	120339245	121087444	1900	110	LTL	3.16986e-06	0.398443
1050	6	121087445	121908063	2121	119	LTL	7.1952e-06	0.307796
1051	6	121908064	122929290	2167	129	LTL	8.54572e-06	0.286365
1052	6	122929291	123854857	2128	212	LTL	4.23756e-05	0.0241933
1053	6	123854858	125365054	3196	323	LTL	0.000116438	1.56471e-05
1054	6	125365055	127545459	2981	271	LTL	0.00013517	1.73527e-07
1055	6	127545460	128763380	1983	194	LTL	3.87327e-05	0.0294387
1056	6	128763381	129850178	2268	207	LTL	8.10037e-06	0.33461
1057	6	129850179	130550137	1863	237	LTL	0.000100554	1.77427e-05
1058	6	130550138	131457164	2527	160	LTL	6.48903e-05	0.000526947
1059	6	131457165	132890694	2755	271	LTL	4.46445e-05	0.031692
1060	6	132890695	134313643	3127	259	LTL	8.51448e-05	0.000295064
1061	6	134313644	135544083	2559	292	LTL	0.00013457	4.06721e-07
1062	6	135544084	137553212	2753	298	LTL	0.000148979	4.35282e-08
1063	6	137553213	138825721	3127	290	LTL	5.70622e-05	0.0117508
1064	6	138825722	139716713	2100	230	LTL	8.37659e-06	0.337827
1065	6	139716714	141449453	2952	236	LTL	1.21569e-05	0.279976
1066	6	141449454	143083347	2801	209	LTL	8.85435e-06	0.322305
1067	6	143083348	144791455	3138	317	LTL	7.82995e-05	0.00174076
1068	6	144791456	145778282	2153	167	LTL	3.27539e-05	0.041896
1069	6	145778283	147015882	2013	152	LTL	2.34697e-05	0.0925735
1070	6	147015883	148184844	2320	250	LTL	3.4037e-05	0.0677058
1071	6	148184845	149278798	3167	309	LTL	1.48646e-05	0.268429
1072	6	149278799	150635315	3197	263	LTL	5.06139e-05	0.0171859
1073	6	150635316	151629954	3160	304	LTL	0.000155201	1.84377e-08
1074	6	151629955	152376499	1862	210	LTL	8.49885e-05	9.35384e-05
1075	6	152376500	153082361	1914	216	LTL	8.90258e-05	5.90696e-05
1076	6	153082362	153791461	1870	178	LTL	2.99489e-05	0.0609759
1077	6	153791462	154462010	1837	127	LTL	2.96255e-05	0.0376351
1078	6	154462011	155523957	2732	315	LTL	0.000167173	3.39626e-09
1079	6	155523958	156762740	3129	297	LTL	8.60159e-05	0.000528163
1080	6	156762741	158220143	2746	303	LTL	0.000172798	7.14344e-10
1081	6	158220144	158952060	1964	167	LTL	3.25592e-05	0.042753
1082	6	158952061	159604052	1937	182	LTL	6.00617e-05	0.00186203
1083	6	159604053	160583918	2351	224	LTL	3.05926e-05	0.0776964
1084	6	160583919	161371014	1872	157	LTL	2.92802e-05	0.0545234
1085	6	161371015	162254229	2325	282	LTL	3.14657e-05	0.0948802
1086	6	162254230	163336361	2998	239	LTL	6.82635e-05	0.0018261
1087	6	163336362	164687462	3620	323	LTL	4.16416e-05	0.0542841
1088	6	164687463	165835953	3345	244	LTL	4.28657e-05	0.0304781
1089	6	165835954	166853325	2983	294	LTL	0.000192964	8.60083e-12
1090	6	166853326	167714865	2559	258	LTL	3.61011e-05	0.0599268
1091	6	167714866	168707338	2733	288	LTL	5.61136e-06	0.397073
1092	6	168707339	169667886	3359	258	LTL	2.77324e-05	0.112522
1093	6	169667887	171053405	3137	234	LTL	9.89461e-05	2.09384e-05
1094	7	15064	617319	855	153	LTL	0.000101098	4.81588e-07
1095	7	617320	1366972	2114	223	LTL	1.39718e-05	0.247571
1096	7	1366973	2473749	2852	269	LTL	7.69636e-05	0.00101763
1097	7	2473750	3100211	1842	286	LTL	3.19723e-05	0.0929976
1098	7	3100212	4139431	3102	264	LTL	1.69453e-05	0.225467
1100	7	4938443	6020653	3015	313	LTL	0.000106872	4.73773e-05
1103	7	7167611	7926500	2300	253	LTL	2.06161e-05	0.177335
1104	7	7926501	8718351	2354	276	LTL	7.63523e-05	0.00122514
1106	7	9225107	9900801	2307	203	LTL	2.27231e-05	0.130266
1107	7	9900802	10481677	1893	174	LTL	2.1283e-05	0.127768
1108	7	10481678	11232447	2101	161	LTL	5.92635e-05	0.00129
1109	7	11232448	11855413	1984	241	LTL	0.000101252	1.78961e-05
1110	7	11855414	12694915	3121	197	LTL	1.40024e-05	0.234096
1111	7	12694916	13213541	1696	170	LTL	1.95314e-05	0.144364
1112	7	13213542	13676747	1627	169	LTL	1.92162e-06	0.444027
1113	7	13676748	15013694	3367	335	LTL	3.8182e-05	0.0730615
1114	7	15013695	15877564	2129	237	LTL	2.65268e-05	0.11304
1115	7	15877565	16739013	2202	223	LTL	6.84713e-05	0.0013451
1116	7	16739014	17596578	2219	285	LTL	3.05345e-05	0.102349
1118	7	19131027	20122179	3011	238	LTL	3.06246e-05	0.0833396
1119	7	20122180	21390644	3237	311	LTL	5.15718e-05	0.0229053
1120	7	21390645	22165060	2402	299	LTL	8.73131e-05	0.000465155
1121	7	22165061	23106680	2392	221	LTL	5.73668e-05	0.00518484
1122	7	23106681	24151099	2193	189	LTL	0.000210347	3.05636e-17
1123	7	24151100	24894119	2124	191	LTL	6.19286e-06	0.363644
1124	7	24894120	25671575	2135	260	LTL	5.23167e-05	0.0141542
1125	7	25671576	27351286	3460	275	LTL	0.000135376	1.94559e-07
1126	7	27351287	28890886	3458	316	LTL	6.1363e-05	0.0098169
1127	7	28890887	30175113	3405	300	LTL	9.68739e-05	0.000139341
1128	7	30175114	31730554	3296	315	LTL	2.90077e-05	0.124535
1129	7	31730555	32460228	2116	213	LTL	8.73179e-05	7.08182e-05
1130	7	32460229	33159277	1637	97	LTL	3.71854e-05	0.00725779
1131	7	33159278	34114532	1884	197	LTL	6.78675e-05	0.000861459
1133	7	35354136	36507690	2847	258	LTL	3.77547e-05	0.0523768
1134	7	36507691	37981936	3601	315	LTL	7.80751e-05	0.00173937
1135	7	37981937	38966483	3012	234	LTL	8.26254e-05	0.000244387
1136	7	38966484	40261240	2427	206	LTL	5.5446e-05	0.00522689
1137	7	40261241	41415925	1976	227	LTL	9.69901e-06	0.314979
1138	7	41415926	42494806	2328	256	LTL	7.87168e-05	0.000651353
1139	7	42494807	43448815	2226	207	LTL	3.92369e-05	0.0316175
1140	7	43448816	44989571	2932	255	LTL	3.5585e-05	0.0614473
1141	7	44989572	46247335	3322	249	LTL	9.64298e-05	4.69509e-05
1142	7	46247336	47253454	2863	234	LTL	2.08305e-05	0.166053
1143	7	47253455	48363585	2686	279	LTL	0.000136489	1.86148e-07
1145	7	48984626	49632426	1907	147	LTL	1.82362e-05	0.143457
1146	7	49632427	50894508	3030	232	LTL	0.000179852	2.86559e-12
1147	7	50894509	51951647	2341	237	LTL	3.20082e-05	0.0743171
1148	7	51951648	52635123	2307	137	LTL	3.53044e-05	0.0217019
1150	7	53176524	54086987	2917	156	LTL	6.2772e-05	0.000656993
1151	7	54086988	54550500	1770	80	LTL	1.34865e-05	0.142886
1152	7	54550501	55161394	1631	142	LTL	1.40121e-05	0.198235
1153	7	55161395	56303513	3065	213	LTL	3.08836e-05	0.0712045
1159	7	65294278	66453993	2141	47	LTL	1.95549e-05	0.0312107
1161	7	66914876	67474722	1889	157	LTL	1.0289e-05	0.271577
1162	7	67474723	68569224	3613	272	LTL	1.67471e-05	0.231192
1163	7	68569225	70144614	2702	229	LTL	3.73596e-05	0.0449564
1164	7	70144615	71215741	3047	265	LTL	8.31215e-05	0.000434065
1166	7	73128831	75243899	1629	242	LTL	0.000121867	5.89064e-07
1167	7	75243900	76451928	2208	207	LTL	2.57076e-05	0.10534
1168	7	76451929	77663964	2251	206	LTL	1.55554e-05	0.216698
1169	7	77663965	78685009	3193	278	LTL	0.00011511	5.99654e-06
1170	7	78685010	80055721	2818	213	LTL	6.9286e-05	0.000994069
1171	7	80055722	81533566	3067	294	LTL	0.000146586	5.67421e-08
1172	7	81533567	82759283	2781	258	LTL	0.000125331	5.88068e-07
1173	7	82759284	83953009	2943	225	LTL	2.91359e-05	0.0878058
1175	7	85356716	86446538	2370	133	LTL	1.01438e-05	0.257912
1176	7	86446539	87836641	2285	199	LTL	5.2247e-05	0.00692566
1177	7	87836642	89330087	3322	224	LTL	3.43591e-05	0.0566009
1178	7	89330088	90660831	3295	166	LTL	3.22264e-05	0.0438263
1179	7	90660832	92530165	2435	258	LTL	7.52422e-05	0.00104988
1180	7	92530166	93691725	2219	241	LTL	7.11843e-05	0.00130899
1181	7	93691726	95174847	2260	234	LTL	8.79229e-05	0.000113439
1182	7	95174848	96564981	2737	232	LTL	9.17046e-05	6.10534e-05
1183	7	96564982	97420207	1702	206	LTL	5.55479e-05	0.00516249
1185	7	98173565	99465540	2238	197	LTL	8.09103e-05	0.000122156
1186	7	99465541	100849307	1999	222	LTL	0.000154346	3.93861e-10
1187	7	100849308	101950748	2989	246	LTL	6.269e-05	0.00395788
1188	7	101950749	103191322	1646	135	LTL	3.60409e-05	0.0191741
1189	7	103191323	104109231	2629	217	LTL	3.97029e-05	0.0329683
1190	7	104109232	105312563	2144	230	LTL	6.01918e-05	0.00422804
1191	7	105312564	106399739	2604	309	LTL	0.000111646	2.23091e-05
1192	7	106399740	107658603	2258	250	LTL	3.23218e-05	0.0774796
1193	7	107658604	109095558	3140	230	LTL	6.21909e-05	0.00333066
1194	7	109095559	110479479	2970	255	LTL	4.30085e-05	0.0326871
1195	7	110479480	111795299	1934	231	LTL	3.98473e-05	0.0364051
1196	7	111795300	113339386	2831	228	LTL	1.28605e-06	0.463529
1197	7	113339387	115321301	2862	247	LTL	0.000122948	5.9017e-07
1198	7	115321302	116835336	2578	239	LTL	5.26139e-05	0.0110718
1199	7	116835337	118342090	2601	189	LTL	7.93616e-05	0.000123391
1200	7	118342091	119568236	1722	92	LTL	4.63234e-06	0.349669
1201	7	119568237	121042050	2287	171	LTL	4.60621e-05	0.00962805
1202	7	121042051	121946052	1894	170	LTL	5.00588e-05	0.00568858
1203	7	121946053	123859746	3547	244	LTL	0.000210427	6.04903e-15
1204	7	123859747	125389586	3433	190	LTL	0.000907227	3.61078e-128
1205	7	125389587	126640872	3122	162	LTL	0.00010794	1.9403e-07
1206	7	126640873	127903738	2279	197	LTL	9.22719e-05	1.89338e-05
1207	7	127903739	128779173	2092	199	LTL	0.000212214	5.62669e-17
1208	7	128779174	130418704	3205	278	LTL	0.000111536	1.03929e-05
1209	7	130418705	131856481	3163	333	LTL	3.51008e-05	0.0892109
1210	7	131856482	133807216	3200	277	LTL	6.39813e-05	0.00507792
1211	7	133807217	134943221	2616	203	LTL	1.34971e-05	0.244786
1212	7	134943222	136113467	2816	266	LTL	3.50962e-05	0.0676527
1213	7	136113468	137657459	2738	266	LTL	3.41847e-05	0.0725667
1214	7	137657460	138755107	2674	319	LTL	3.27983e-05	0.0989791
1215	7	138755108	140217630	2935	311	LTL	0.000110006	2.94159e-05
1216	7	140217631	142098979	2852	254	LTL	5.47993e-05	0.0103578
1217	7	142098980	144324464	2891	239	LTL	6.21345e-05	0.00382776
1218	7	144324465	145415775	2643	215	LTL	6.61806e-05	0.00156532
1220	7	146574328	147352171	2220	185	LTL	2.17935e-05	0.129276
1221	7	147352172	148622913	3396	305	LTL	0.000141958	1.85048e-07
1222	7	148622914	149842999	2353	254	LTL	8.30093e-05	0.000355648
1223	7	149843000	150897818	2460	236	LTL	0.000107584	5.47997e-06
1224	7	150897819	152253294	2566	333	LTL	0.000102117	0.000130857
1225	7	152253295	153241228	2962	292	LTL	0.00016805	1.05317e-09
1226	7	153241229	154407487	2543	296	LTL	5.85446e-05	0.010753
1227	7	154407488	155280610	2873	321	LTL	7.20933e-05	0.00355075
1228	7	155280611	156344386	3048	346	LTL	8.57399e-05	0.00110953
1229	7	156344387	157199331	2440	225	LTL	3.34188e-05	0.0617524
1230	7	157199332	158031247	2490	291	LTL	2.90669e-05	0.115311
1231	7	158031248	159128566	2657	224	LTL	0.000301652	1.88035e-26
1232	8	11740	660414	1752	222	LTL	0.000152254	6.13347e-10
1233	8	660415	1161824	1572	213	LTL	3.14302e-05	0.0679609
1234	8	1161825	1628039	1710	235	LTL	7.41024e-05	0.000803909
1235	8	1628040	2070902	1599	300	LTL	6.19583e-05	0.00799383
1237	8	2396123	2970491	2184	273	LTL	0.000158046	2.89541e-09
1238	8	2970492	3386667	2272	249	LTL	2.35131e-05	0.145546
1239	8	3386668	3787248	2414	266	LTL	0.000121484	1.4879e-06
1240	8	3787249	4273083	2638	302	LTL	5.55342e-05	0.0150425
1241	8	4273084	4893120	2774	320	LTL	3.84687e-05	0.0674303
1242	8	4893121	5566269	3135	275	LTL	1.56259e-05	0.246713
1243	8	5566270	6019163	2322	214	LTL	4.30162e-05	0.0231147
1244	8	6019164	6663427	2794	305	LTL	2.96424e-05	0.116133
1245	8	6663428	8064600	1169	223	LTL	0.000132435	3.61702e-08
1246	8	8064601	8589770	1642	186	LTL	6.65611e-05	0.000807155
1247	8	8589771	9167795	1850	225	LTL	6.34073e-05	0.00265382
1248	8	9167796	9835863	1868	175	LTL	2.01157e-05	0.140996
1250	8	10478852	11466761	2700	279	LTL	8.31124e-05	0.000559548
1251	8	11466762	12296849	1455	202	LTL	5.03439e-05	0.00905036
1252	8	12296850	12947935	1407	170	LTL	5.07958e-05	0.00516362
1253	8	12947936	13395051	1711	157	LTL	1.95522e-05	0.135241
1254	8	13395052	13948095	3040	220	LTL	5.29496e-06	0.388542
1255	8	13948096	14389305	1764	154	LTL	4.27635e-05	0.0110902
1256	8	14389306	14872767	1822	171	LTL	3.4634e-05	0.0358101
1258	8	15359693	15999328	2253	219	LTL	4.60335e-05	0.0178227
1259	8	15999329	16988030	2749	265	LTL	3.26448e-05	0.0811405
1260	8	16988031	17492672	1768	253	LTL	6.62347e-05	0.00289179
1261	8	17492673	17947004	1804	164	LTL	1.78163e-05	0.161002
1262	8	17947005	18668609	2765	258	LTL	6.76322e-05	0.00263768
1263	8	18668610	19488888	2594	290	LTL	7.30979e-05	0.00218878
1264	8	19488889	20135628	1994	245	LTL	5.61303e-05	0.00813676
1265	8	20135629	20812107	1880	204	LTL	1.72525e-06	0.452841
1266	8	20812108	21650453	2319	279	LTL	8.17197e-05	0.000666291
1267	8	21650454	22895018	2628	317	LTL	0.000339925	4.50385e-26
1268	8	22895019	23788494	2672	269	LTL	0.000138657	8.68508e-08
1269	8	23788495	24863243	2176	201	LTL	7.70091e-05	0.000248916
1270	8	24863244	25859277	2271	252	LTL	4.56944e-06	0.407976
1271	8	25859278	26679135	2637	237	LTL	6.64791e-05	0.00220402
1273	8	27406512	28344176	2350	248	LTL	0.000102267	1.87109e-05
1274	8	28344177	29744540	2525	292	LTL	8.85861e-05	0.000351496
1275	8	29744541	31134786	2619	234	LTL	8.67859e-05	0.000134084
1276	8	31134787	32454962	3406	228	LTL	3.89663e-05	0.0385842
1278	8	33982538	34792220	1896	103	LTL	3.1598e-05	0.0195815
1279	8	34792221	36641174	2001	209	LTL	5.71633e-05	0.00443975
1280	8	36641175	38803980	3165	340	LTL	4.55432e-05	0.0440385
1281	8	38803981	40179577	2700	222	LTL	2.47982e-05	0.120725
1282	8	40179578	40974254	2360	196	LTL	6.96295e-05	0.000654391
1283	8	40974255	41725002	1969	211	LTL	4.35191e-05	0.0213056
1284	8	41725003	43825633	2983	182	LTL	7.71214e-05	0.000143099
1285	8	43825634	49044813	1425	90	LTL	0.000106073	6.61062e-10
1286	8	49044814	50288660	2222	167	LTL	0.000114576	6.43124e-08
1287	8	50288661	51461455	2316	108	LTL	4.1335e-05	0.00507909
1289	8	52326237	53108910	1924	147	LTL	5.1472e-05	0.00291682
1291	8	54119374	55275354	2381	190	LTL	6.37706e-05	0.00131599
1292	8	55275355	56346878	2198	204	LTL	0.000131558	1.59661e-08
1293	8	56346879	57436722	2467	203	LTL	0.000245055	1.1902e-20
1294	8	57436723	58675117	3300	228	LTL	6.56317e-05	0.00211309
1295	8	58675118	59555977	2138	202	LTL	1.76554e-05	0.186669
1296	8	59555978	60476248	1715	213	LTL	3.22596e-05	0.0632667
1298	8	61324890	62330900	1925	224	LTL	6.90333e-05	0.00127312
1300	8	63253463	64215358	2365	151	LTL	6.31269e-05	0.000535523
1301	8	64215359	66018204	2764	224	LTL	8.27076e-05	0.000190709
1302	8	66018205	66960438	1989	160	LTL	7.74941e-05	6.38841e-05
1303	8	66960439	68683823	2479	229	LTL	6.28911e-05	0.00301311
1304	8	68683824	70004665	3075	289	LTL	1.1998e-05	0.300895
1305	8	70004666	70872088	1838	243	LTL	7.32739e-05	0.00103853
1306	8	70872089	72013184	2020	137	LTL	4.09131e-05	0.0104756
1307	8	72013185	72917489	2124	266	LTL	4.89736e-05	0.0206091
1308	8	72917490	73838027	2278	213	LTL	0.000147862	8.997e-10
1309	8	73838028	75011699	2495	255	LTL	0.000451768	2.42054e-44
1310	8	75011700	76295483	2901	234	LTL	4.52785e-05	0.0222615
1312	8	77377990	78633659	2680	183	LTL	6.76569e-05	0.000638595
1313	8	78633660	79756169	2558	139	LTL	3.91279e-05	0.0137648
1314	8	79756170	81340231	3361	271	LTL	7.78118e-05	0.000947082
1315	8	81340232	82878769	2908	261	LTL	8.67495e-05	0.000247373
1316	8	82878770	83730337	2130	149	LTL	2.86432e-05	0.0539862
1317	8	83730338	85116734	3491	176	LTL	1.50698e-05	0.2062
1318	8	85116735	86251870	1915	126	LTL	4.26893e-05	0.0064955
1319	8	86251871	87563145	1764	143	LTL	5.93247e-06	0.349488
1320	8	87563146	89081177	2994	216	LTL	0.000107516	2.71234e-06
1321	8	89081178	90364149	2887	178	LTL	5.95665e-05	0.0018325
1322	8	90364150	91457962	1962	175	LTL	5.69034e-06	0.367816
1324	8	92876621	94999066	3321	299	LTL	0.000100629	8.25948e-05
1325	8	94999067	96175630	2889	215	LTL	0.000103289	5.4538e-06
1326	8	96175631	96900513	2000	253	LTL	7.91597e-05	0.000581534
1327	8	96900514	98132519	2107	236	LTL	4.29727e-05	0.0282944
1328	8	98132520	99388944	2775	271	LTL	0.000139573	7.99043e-08
1330	8	101448440	102548680	2223	304	LTL	9.49271e-05	0.000193872
1331	8	102548681	103716053	2758	261	LTL	0.000117827	2.30583e-06
1332	8	103716054	104467845	1897	208	LTL	6.86635e-05	0.000976755
1333	8	104467846	105370130	2224	92	LTL	1.85142e-05	0.090775
1334	8	105370131	106500950	2212	221	LTL	9.80047e-05	1.62819e-05
1335	8	106500951	107787163	2546	211	LTL	3.44811e-05	0.0512408
1336	8	107787164	108647463	2015	169	LTL	2.33085e-05	0.104869
1337	8	108647464	109920827	2692	192	LTL	1.96255e-05	0.157032
1338	8	109920828	111207349	2389	193	LTL	3.71067e-05	0.0344022
1339	8	111207350	112601513	2006	140	LTL	4.31488e-05	0.00818444
1340	8	112601514	113650853	1970	119	LTL	2.58617e-05	0.052973
1341	8	113650854	114781574	2271	101	LTL	3.71349e-06	0.379824
1342	8	114781575	115334858	1504	118	LTL	6.31922e-06	0.326708
1343	8	115334859	116094203	1968	98	LTL	2.94319e-05	0.0240759
1344	8	116094204	118300068	3273	305	LTL	0.000112733	1.73831e-05
1345	8	118300069	119423298	2190	244	LTL	8.59296e-05	0.000191992
1346	8	119423299	120216587	1982	184	LTL	4.4396e-05	0.0141642
1347	8	120216588	121554390	2858	205	LTL	3.90638e-05	0.0315881
1348	8	121554391	122622804	2500	240	LTL	3.76368e-05	0.0472942
1349	8	122622805	124001019	2580	285	LTL	9.44174e-05	0.000143395
1350	8	124001020	125453322	3118	298	LTL	4.95718e-06	0.409053
1351	8	125453323	126766827	3036	298	LTL	1.9694e-05	0.20618
1352	8	126766828	128073654	3114	290	LTL	5.4665e-05	0.0147663
1353	8	128073655	129291118	3127	342	LTL	6.77959e-05	0.00670977
1354	8	129291119	130383563	2398	198	LTL	1.18106e-05	0.26839
1355	8	130383564	131545725	2804	218	LTL	5.3638e-05	0.00767348
1356	8	131545726	132534636	2579	242	LTL	1.65977e-05	0.220409
1357	8	132534637	133461551	2455	223	LTL	1.24909e-05	0.269467
1358	8	133461552	134509448	2684	294	LTL	2.447e-05	0.155423
1359	8	134509449	135313673	2615	276	LTL	6.37265e-05	0.00515806
1360	8	135313674	136220342	2297	245	LTL	9.63823e-05	4.2545e-05
1361	8	136220343	137527617	3066	224	LTL	5.08537e-05	0.0112786
1362	8	137527618	138564843	2862	187	LTL	1.90063e-05	0.16129
1363	8	138564844	139404631	2336	250	LTL	6.19604e-05	0.00454038
1364	8	139404632	140355988	2399	272	LTL	3.24922e-05	0.0846346
1365	8	140355989	141527881	2728	301	LTL	6.8655e-05	0.00407059
1366	8	141527882	142611889	2446	278	LTL	7.6641e-05	0.0012204
1367	8	142611890	143611461	2497	275	LTL	4.23581e-05	0.0395896
1368	8	143611462	144934288	3301	272	LTL	1.02962e-05	0.320549
1369	8	144934289	146303787	1519	219	LTL	5.03317e-05	0.0112562
1370	9	10469	653661	1642	202	LTL	6.83417e-05	0.000899312
1371	9	653662	1103598	1593	249	LTL	0.000157197	1.02565e-09
1372	9	1103599	1874961	2501	273	LTL	6.61636e-05	0.00381338
1373	9	1874962	2441120	1681	277	LTL	0.000107997	1.72652e-05
1374	9	2441121	3079045	1698	266	LTL	9.23051e-05	0.000128126
1375	9	3079046	4025355	2057	297	LTL	1.18243e-06	0.469719
1376	9	4025356	4596614	1760	279	LTL	0.000139628	1.08005e-07
1377	9	4596615	5437591	1961	239	LTL	8.696e-05	0.000147532
1378	9	5437592	6859791	3214	298	LTL	3.5409e-05	0.0765105
1379	9	6859792	7388202	1958	221	LTL	7.35888e-05	0.000650799
1380	9	7388203	8262303	2552	295	LTL	0.000105322	3.95455e-05
1381	9	8262304	9170120	2933	295	LTL	5.23353e-05	0.0190594
1382	9	9170121	9920258	2265	257	LTL	2.34756e-05	0.149512
1383	9	9920259	10675474	2502	255	LTL	5.44243e-05	0.0108814
1384	9	10675475	11270764	1772	180	LTL	4.53043e-05	0.0120627
1387	9	12664859	13512852	1693	252	LTL	3.92685e-05	0.0444406
1388	9	13512853	14244747	2111	260	LTL	3.00591e-05	0.0960627
1389	9	14244748	14902924	1811	301	LTL	2.49114e-05	0.154026
1390	9	14902925	15839403	2075	230	LTL	4.30389e-05	0.0267218
1391	9	15839404	16658377	1932	269	LTL	5.42977e-05	0.0126711
1392	9	16658378	17392382	2104	168	LTL	1.05732e-05	0.273082
1393	9	17392383	17990565	1699	191	LTL	4.07075e-05	0.0232043
1394	9	17990566	18754196	2026	239	LTL	3.41723e-05	0.0630165
1395	9	18754197	19463292	1987	227	LTL	3.21725e-05	0.06939
1396	9	19463293	20483880	2202	286	LTL	5.74556e-05	0.0109007
1397	9	20483881	21674032	2565	245	LTL	1.23903e-05	0.280054
1398	9	21674033	23091193	2967	286	LTL	2.42952e-05	0.1539
1399	9	23091194	23859374	1740	260	LTL	6.98459e-05	0.0020922
1400	9	23859375	24757729	1742	216	LTL	3.05423e-05	0.0745906
1401	9	24757730	25957606	3164	295	LTL	3.29736e-05	0.0897787
1402	9	25957607	26747214	1773	206	LTL	1.96985e-05	0.164198
1404	9	27366480	28067454	1765	225	LTL	1.69169e-05	0.208242
1405	9	28067455	28766060	1777	229	LTL	2.44454e-05	0.127341
1407	9	29596502	30410078	1883	149	LTL	6.12421e-05	0.000683759
1408	9	30410079	31115153	1677	107	LTL	1.82359e-05	0.109065
1409	9	31115154	32253283	3393	161	LTL	3.13825e-05	0.0455715
1410	9	32253284	33194892	2266	224	LTL	0.00012828	8.44953e-08
1411	9	33194893	34704544	2942	212	LTL	0.000204097	1.70022e-15
1412	9	34704545	36749273	3346	296	LTL	8.52179e-05	0.000573146
1413	9	36749274	37687112	2011	244	LTL	0.000149691	3.52156e-09
1414	9	37687113	38822977	2372	281	LTL	1.35184e-05	0.277091
1418	9	70939678	72288878	2779	247	LTL	6.98594e-05	0.00170779
1419	9	72288879	73915494	3549	232	LTL	3.31057e-05	0.0661028
1420	9	73915495	74950318	1981	255	LTL	2.47186e-05	0.136893
1421	9	74950319	76197744	2386	171	LTL	2.53031e-05	0.0890528
1422	9	76197745	77862308	3120	267	LTL	3.32102e-05	0.0784889
1423	9	77862309	78630915	2213	234	LTL	5.51943e-05	0.00789965
1424	9	78630916	79451035	2188	285	LTL	4.50737e-05	0.0335535
1426	9	80137025	81161597	2065	199	LTL	2.20461e-05	0.134818
1427	9	81161598	82601465	2805	323	LTL	1.73806e-05	0.241774
1428	9	82601466	83455502	2607	177	LTL	3.58878e-05	0.0333679
1429	9	83455503	85135751	3154	298	LTL	4.69856e-05	0.0310462
1430	9	85135752	86769886	3420	301	LTL	0.000119358	5.91873e-06
1431	9	86769887	87815449	2600	234	LTL	6.67247e-05	0.00203646
1432	9	87815450	89171796	2595	236	LTL	2.56651e-05	0.119841
1433	9	89171797	90135154	2369	253	LTL	1.98521e-05	0.185879
1434	9	90135155	90890979	1997	212	LTL	6.05921e-05	0.00304494
1435	9	90890980	91643255	1893	179	LTL	5.73333e-06	0.368378
1436	9	91643256	92500277	1906	210	LTL	4.90229e-05	0.0116659
1437	9	92500278	93441050	2207	209	LTL	2.99644e-05	0.0751572
1438	9	93441051	94175374	1810	216	LTL	2.53523e-05	0.112891
1440	9	94924483	95854925	1852	127	LTL	2.57261e-05	0.0589818
1441	9	95854926	96670171	2234	172	LTL	7.38375e-06	0.333636
1442	9	96670172	97418633	1631	154	LTL	2.63651e-05	0.0711787
1443	9	97418634	98885862	2741	241	LTL	6.49341e-05	0.00282884
1444	9	98885863	100310517	2120	208	LTL	5.62211e-05	0.00490463
1445	9	100310518	101596750	2920	281	LTL	0.000149191	2.13629e-08
1446	9	101596751	103165725	2543	246	LTL	2.30058e-05	0.149132
1447	9	103165726	104222848	2346	198	LTL	5.64938e-05	0.00403863
1448	9	104222849	105043411	2390	202	LTL	4.01169e-05	0.0276264
1449	9	105043412	105846545	2596	161	LTL	3.12402e-05	0.0462526
1450	9	105846546	107061019	3223	195	LTL	6.93998e-05	0.000660849
1451	9	107061020	108203095	3126	263	LTL	2.16047e-05	0.171118
1452	9	108203096	109150717	1660	176	LTL	1.55815e-05	0.198898
1453	9	109150718	110630150	3409	333	LTL	0.000134172	1.49837e-06
1454	9	110630151	111368107	1899	203	LTL	5.79764e-05	0.00364169
1455	9	111368108	112076381	1921	177	LTL	1.69341e-05	0.181056
1456	9	112076382	112865520	2155	232	LTL	2.52377e-05	0.12168
1457	9	112865521	113646149	2206	231	LTL	8.71296e-05	0.000118298
1458	9	113646150	114443475	1919	192	LTL	7.8715e-05	0.00014939
1459	9	114443476	115390112	2211	185	LTL	2.73285e-05	0.0814116
1460	9	115390113	116159540	1882	225	LTL	8.56801e-05	0.000125994
1461	9	116159541	117054909	2158	278	LTL	0.000135035	2.30408e-07
1462	9	117054910	117989017	2256	240	LTL	7.92034e-05	0.000447772
1463	9	117989018	119001227	2241	193	LTL	2.65734e-05	0.091185
1464	9	119001228	119890464	2018	238	LTL	3.51723e-05	0.0576395
1465	9	119890465	121008529	2496	237	LTL	5.49779e-05	0.00838991
1466	9	121008530	122677719	3219	297	LTL	4.90975e-05	0.0257548
1467	9	122677720	124119883	2091	236	LTL	4.56426e-05	0.0218738
1468	9	124119884	125137578	2165	261	LTL	2.38839e-05	0.147341
1470	9	126092932	127184582	2365	240	LTL	6.35716e-05	0.00327836
1471	9	127184583	128785782	1892	192	LTL	2.49564e-05	0.103741
1472	9	128785783	129617771	1894	276	LTL	2.49329e-05	0.143908
1473	9	129617772	130902727	1923	201	LTL	0.0001159	3.0588e-07
1474	9	130902728	132193798	1795	228	LTL	9.38968e-05	3.89196e-05
1475	9	132193799	132999452	2359	245	LTL	7.1854e-05	0.00128839
1476	9	132999453	134141936	2289	311	LTL	2.97645e-05	0.117365
1477	9	134141937	135135887	1865	255	LTL	4.87978e-05	0.0190766
1478	9	135135888	136042490	2014	268	LTL	0.000209984	4.22487e-14
1479	9	136042491	136770926	2196	265	LTL	9.01761e-05	0.000168388
1480	9	136770927	137593527	2122	276	LTL	1.4986e-05	0.255493
1481	9	137593528	138202112	2164	314	LTL	0.000123645	4.39228e-06
1482	9	138202113	138995791	2068	312	LTL	0.000125131	3.32839e-06
1483	9	138995792	140097759	1830	252	LTL	5.90774e-05	0.00641821
1485	10	60515	1329232	2456	226	LTL	4.86979e-05	0.0145243
1486	10	1329233	1872960	1684	247	LTL	9.6447e-05	4.44329e-05
1487	10	1872961	2637065	2987	235	LTL	9.01275e-05	8.38574e-05
1488	10	2637066	3225336	1959	249	LTL	6.97819e-05	0.00178031
1489	10	3225337	3880322	1876	229	LTL	6.5798e-05	0.00210438
1491	10	4813183	5396242	2276	182	LTL	2.63255e-05	0.0872412
1492	10	5396243	6234718	2573	302	LTL	0.000169582	1.24747e-09
1493	10	6234719	6897037	1795	279	LTL	0.000141857	7.30465e-08
1494	10	6897038	7659872	2381	293	LTL	3.34682e-05	0.0860516
1495	10	7659873	8771920	3366	311	LTL	3.58331e-05	0.0782825
1496	10	8771921	10081279	3127	229	LTL	1.07034e-05	0.299624
1497	10	10081280	10969481	2251	241	LTL	1.38641e-05	0.257079
1498	10	10969482	11856924	2247	281	LTL	4.44234e-05	0.0345492
1499	10	11856925	12581571	1911	247	LTL	0.000100769	2.29526e-05
1500	10	12581572	13208061	1804	263	LTL	0.000111714	6.58268e-06
1501	10	13208062	14008135	2278	306	LTL	7.88667e-05	0.00141205
1502	10	14008136	14820755	2546	273	LTL	3.52258e-05	0.0693236
1503	10	14820756	15946677	2815	282	LTL	6.02281e-05	0.0079438
1504	10	15946678	17065860	2653	270	LTL	0.000138994	8.51124e-08
1505	10	17065861	18529742	3178	267	LTL	4.15373e-05	0.0403345
1506	10	18529743	19421514	2540	209	LTL	3.36896e-05	0.0542637
1507	10	19421515	19965624	1828	135	LTL	2.7465e-05	0.0530753
1508	10	19965625	20616432	1847	180	LTL	1.87281e-05	0.160291
1509	10	20616433	21477692	2115	209	LTL	3.89123e-05	0.033226
1510	10	21477693	23365685	2835	243	LTL	1.23613e-05	0.279703
1511	10	23365686	24489447	2057	204	LTL	1.77532e-05	0.186549
1512	10	24489448	25577761	2106	279	LTL	3.97651e-05	0.0501502
1513	10	25577762	26161974	1968	154	LTL	3.95773e-05	0.0165232
1514	10	26161975	26888716	2228	141	LTL	7.27732e-06	0.320135
1515	10	26888717	27669566	2199	145	LTL	3.46261e-05	0.0264162
1516	10	27669567	28734422	2697	205	LTL	4.97019e-05	0.0101432
1517	10	28734423	29393749	1866	214	LTL	3.62666e-05	0.0444921
1518	10	29393750	30000223	1901	217	LTL	0.000103698	5.46494e-06
1519	10	30000224	30919469	2429	264	LTL	3.68838e-05	0.0581582
1520	10	30919470	32457293	2967	230	LTL	6.21463e-05	0.00334863
1521	10	32457294	33655458	3127	183	LTL	9.01653e-05	1.63496e-05
1522	10	33655459	35178224	3234	303	LTL	5.95632e-05	0.0103853
1523	10	35178225	36475838	2458	225	LTL	8.69026e-05	0.000104897
1524	10	36475839	37561443	2370	195	LTL	2.73696e-05	0.0862347
1526	10	38566461	42392742	573	11	LTL	4.00596e-06	0.181487
1527	10	42392743	42984427	320	36	LTL	3.38429e-06	0.320405
1528	10	42984428	43769842	2110	136	LTL	7.30844e-07	0.466202
1529	10	43769843	44893846	3314	215	LTL	8.72888e-05	7.53151e-05
1532	10	49197321	50145673	1767	193	LTL	3.9811e-05	0.0260591
1533	10	50145674	51724039	2104	195	LTL	1.22588e-05	0.259744
1534	10	51724040	53129609	2219	223	LTL	1.77595e-05	0.196524
1535	10	53129610	53919161	2248	226	LTL	5.19652e-05	0.0102297
1536	10	53919162	55104428	2952	261	LTL	8.18076e-05	0.000478044
1537	10	55104429	55867694	2252	161	LTL	5.91262e-05	0.00131681
1538	10	55867695	57044845	3369	245	LTL	6.13108e-05	0.00457441
1539	10	57044846	57955671	2098	128	LTL	2.59529e-05	0.0581444
1540	10	57955672	58809133	2244	89	LTL	1.82458e-05	0.0904571
1541	10	58809134	59822946	3140	145	LTL	7.32448e-06	0.321426
1542	10	59822947	61470383	3073	267	LTL	7.01533e-05	0.00223461
1543	10	61470384	62626465	3011	224	LTL	5.13287e-05	0.0107097
1544	10	62626466	64069687	2925	251	LTL	3.20215e-05	0.0796843
1545	10	64069688	65400431	2794	202	LTL	4.70656e-05	0.0131522
1546	10	65400432	66510387	2004	186	LTL	3.01543e-05	0.0635233
1547	10	66510388	67146043	1817	114	LTL	1.11855e-05	0.222303
1548	10	67146044	67769822	1894	142	LTL	3.99351e-05	0.0130454
1549	10	67769823	68623274	3128	163	LTL	8.63809e-05	1.44887e-05
1550	10	68623275	69904170	2465	167	LTL	7.37795e-05	0.000154088
1551	10	69904171	71050504	2856	197	LTL	8.98971e-05	2.82931e-05
1552	10	71050505	71672997	2078	295	LTL	8.51433e-05	0.000569026
1553	10	71672998	72659223	2870	284	LTL	6.0807e-05	0.00764482
1554	10	72659224	73514214	2479	321	LTL	2.57245e-05	0.154047
1555	10	73514215	75694023	2860	192	LTL	7.95453e-05	0.000131003
1556	10	75694024	77144961	1925	173	LTL	2.71518e-05	0.0763179
1557	10	77144962	78665481	2531	256	LTL	1.20913e-05	0.288577
1558	10	78665482	79952996	2710	277	LTL	3.70738e-05	0.0613477
1559	10	79952997	81190573	3029	347	LTL	0.000170336	6.76548e-09
1560	10	81190574	81763230	1441	86	LTL	1.1312e-05	0.189193
1562	10	82378049	83596350	3363	244	LTL	3.55184e-05	0.0580391
1563	10	83596351	84679429	2254	218	LTL	3.50482e-05	0.0511649
1564	10	84679430	85463484	2567	124	LTL	2.67193e-06	0.416289
1565	10	85463485	86459980	2703	222	LTL	6.84419e-05	0.00132545
1566	10	86459981	87287935	2372	143	LTL	3.16316e-05	0.0364686
1568	10	88443653	89971628	2362	251	LTL	0.000104554	1.42725e-05
1569	10	89971629	91021321	2268	245	LTL	3.26436e-05	0.0736716
1570	10	91021322	91960435	2366	193	LTL	9.2331e-05	1.62464e-05
1571	10	91960436	92911506	2305	195	LTL	2.84525e-05	0.0785837
1572	10	92911507	94503299	2656	193	LTL	3.67232e-05	0.0357521
1573	10	94503300	95528160	2740	246	LTL	0.000103839	1.37889e-05
1574	10	95528161	97040172	2816	193	LTL	0.000137675	2.28778e-09
1575	10	97040173	98005994	2336	195	LTL	8.9693e-05	2.73539e-05
1576	10	98005995	99367800	2664	274	LTL	0.000129955	4.74297e-07
1577	10	99367801	100337830	1952	249	LTL	5.69267e-05	0.00782311
1578	10	100337831	101271451	1620	135	LTL	0.000134875	4.2784e-11
1579	10	101271452	102509298	2347	215	LTL	0.000395267	9.13493e-40
1580	10	102509299	104206837	2476	259	LTL	0.000267908	1.47585e-20
1581	10	104206838	106142283	3470	249	LTL	0.00151253	6.20601e-227
1582	10	106142284	107877787	3474	230	LTL	0.000203603	9.64313e-15
1583	10	107877788	108725997	1981	196	LTL	1.69695e-05	0.192104
1584	10	108725998	109579149	2166	199	LTL	4.22671e-05	0.0214275
1585	10	109579150	110358382	2061	161	LTL	3.7205e-05	0.0240833
1587	10	112164982	113117615	2047	254	LTL	1.52749e-05	0.243036
1588	10	113117616	114255954	2496	219	LTL	8.45404e-06	0.332811
1589	10	114255955	115588903	2610	310	LTL	0.000137772	4.33462e-07
1590	10	115588904	116845213	2562	262	LTL	4.56842e-05	0.0270505
1592	10	118416050	119528730	2131	277	LTL	4.036e-05	0.0472609
1593	10	119528731	120592839	2374	263	LTL	3.87031e-05	0.0498845
1594	10	120592840	121874445	3067	268	LTL	5.84051e-05	0.00827103
1595	10	121874446	122803506	2515	253	LTL	8.06428e-05	0.000478312
1596	10	122803507	123856184	2631	281	LTL	4.73139e-05	0.0268993
1597	10	123856185	124894142	2627	269	LTL	3.31216e-05	0.0797318
1598	10	124894143	125798319	2716	288	LTL	8.49677e-05	0.000517366
1599	10	125798320	126875816	2687	290	LTL	7.894e-05	0.00111304
1600	10	126875817	127997708	2572	258	LTL	5.76303e-05	0.00804107
1601	10	127997709	129134738	2386	294	LTL	6.82842e-05	0.00390622
1602	10	129134739	129831969	2677	282	LTL	9.16412e-05	0.000195824
1603	10	129831970	130694008	2395	305	LTL	0.000167052	2.2746e-09
1604	10	130694009	131694738	2753	294	LTL	9.02649e-05	0.000294083
1605	10	131694739	132576793	2860	253	LTL	1.74031e-05	0.215065
1606	10	132576794	133111170	2330	283	LTL	2.85915e-05	0.115898
1607	10	133111171	133818036	2128	254	LTL	4.07392e-05	0.0396595
1608	10	133818037	134856054	3159	300	LTL	2.44711e-05	0.157734
1609	10	134856055	135524372	1476	173	LTL	0.000127822	5.32151e-09
1610	11	87150	1061399	2288	271	LTL	0.000293618	6.24228e-23
1611	11	1061400	1857845	2407	233	LTL	2.33938e-05	0.139173
1612	11	1857846	2477449	1486	227	LTL	6.50498e-05	0.00223527
1613	11	2477450	3362508	2085	322	LTL	0.000102622	0.000100112
1614	11	3362509	4405707	2186	215	LTL	0.000134702	1.53412e-08
1615	11	4405708	4946051	1980	200	LTL	0.000172527	1.35464e-12
1616	11	4946052	5533057	2127	175	LTL	0.000493994	3.39648e-59
1617	11	5533058	6180840	2371	211	LTL	8.62824e-05	7.86401e-05
1618	11	6180841	7191230	2476	278	LTL	6.45808e-05	0.00481728
1619	11	7191231	7915071	2204	237	LTL	4.52027e-05	0.0230399
1620	11	7915072	9080939	2979	283	LTL	6.45963e-05	0.00509658
1621	11	9080940	10370100	2771	208	LTL	0.000126486	5.47926e-08
1622	11	10370101	11081299	1898	230	LTL	0.000106911	5.00324e-06
1623	11	11081300	11632650	1963	279	LTL	4.53583e-05	0.0314675
1624	11	11632651	12470449	2377	303	LTL	0.000119778	5.86103e-06
1625	11	12470450	13364727	2163	250	LTL	9.80533e-05	3.77561e-05
1626	11	13364728	15126767	2949	240	LTL	7.52648e-05	0.000758562
1627	11	15126768	16383386	2286	228	LTL	7.04085e-05	0.00114546
1628	11	16383387	17583948	2287	209	LTL	3.44199e-05	0.0507863
1629	11	17583949	18740267	2471	242	LTL	8.41008e-05	0.000237535
1630	11	18740268	19780784	2361	265	LTL	6.67087e-05	0.00323289
1631	11	19780785	20686336	2451	312	LTL	0.000127909	2.17866e-06
1632	11	20686337	21442722	1932	274	LTL	7.2701e-05	0.00183456
1634	11	22368744	23164544	1796	163	LTL	1.79225e-07	0.481303
1635	11	23164545	24091272	2778	195	LTL	1.96216e-05	0.158838
1636	11	24091273	24892439	2652	213	LTL	1.16563e-05	0.27791
1637	11	24892440	25662918	2185	127	LTL	1.86047e-05	0.122948
1639	11	26356981	27018307	1947	158	LTL	3.87536e-05	0.0193226
1640	11	27018308	28577718	2343	205	LTL	0.000102913	4.00178e-06
1641	11	28577719	29530460	1860	163	LTL	3.38974e-05	0.0356173
1642	11	29530461	30570129	2040	166	LTL	7.77245e-05	7.63938e-05
1643	11	30570130	32065771	1813	191	LTL	4.03412e-05	0.0241282
1644	11	32065772	32830422	1861	184	LTL	3.37319e-05	0.0444123
1645	11	32830423	33905327	2223	198	LTL	2.11678e-05	0.143403
1646	11	33905328	34672697	1857	251	LTL	3.88445e-05	0.0457868
1647	11	34672698	35500367	2258	183	LTL	6.27835e-05	0.00129767
1648	11	35500368	36331189	1846	257	LTL	5.59702e-05	0.00946876
1649	11	36331190	37119024	1932	190	LTL	3.65026e-05	0.0355544
1650	11	37119025	37953086	2054	172	LTL	7.41311e-05	0.000170668
1651	11	37953087	39329140	2454	147	LTL	2.36465e-05	0.0877491
1652	11	39329141	40362940	2103	217	LTL	1.58355e-05	0.218564
1653	11	40362941	41603195	2670	216	LTL	6.20906e-05	0.00269642
1655	11	42858198	43949377	2754	183	LTL	7.18235e-05	0.000339768
1656	11	43949378	45019559	2753	332	LTL	0.000144379	2.98337e-07
1657	11	45019560	46316005	2544	244	LTL	7.27609e-05	0.00112876
1658	11	46316006	48066366	1940	148	LTL	0.000101713	3.13519e-07
1659	11	48066367	48765366	1473	35	LTL	5.56438e-05	7.42183e-07
1660	11	48765367	49386071	1288	32	LTL	5.70928e-05	2.55345e-07
1661	11	49386072	50217008	1742	23	LTL	3.57016e-05	5.59992e-05
1662	11	50217009	51098366	1554	15	LTL	2.92368e-05	9.67367e-05
1664	11	51581596	55477633	1916	29	LTL	3.37808e-05	0.000264195
1665	11	55477634	55947452	2065	26	LTL	2.57794e-05	0.00186048
1666	11	55947453	56623494	1897	58	LTL	3.25089e-05	0.00394553
1667	11	56623495	57675986	1862	178	LTL	9.49898e-05	5.59249e-06
1668	11	57675987	58452708	1842	81	LTL	4.00879e-05	0.00253484
1669	11	58452709	59256232	1731	122	LTL	2.01909e-05	0.101288
1670	11	59256233	60515105	2191	194	LTL	2.48193e-05	0.106005
1671	11	60515106	61717117	1862	269	LTL	6.199e-05	0.00572756
1672	11	61717118	62800368	1952	235	LTL	9.38319e-05	4.78611e-05
1673	11	62800369	64594822	2703	262	LTL	7.56587e-05	0.00106576
1674	11	64594823	66782661	2919	249	LTL	0.000101267	2.2484e-05
1675	11	66782662	68000949	1866	198	LTL	0.000125862	3.66525e-08
1676	11	68000950	68887344	1717	178	LTL	6.40175e-05	0.000967265
1677	11	68887345	69713996	1962	246	LTL	0.000130706	1.42122e-07
1678	11	69713997	71242834	3690	313	LTL	5.75846e-05	0.0136172
1679	11	71242835	72875068	2963	219	LTL	8.32724e-06	0.334968
1681	11	74399332	75445253	1886	232	LTL	7.32988e-05	0.000844142
1682	11	75445254	76518906	2133	251	LTL	6.80813e-05	0.00225633
1683	11	76518907	77719870	2247	181	LTL	2.79544e-05	0.0749806
1684	11	77719871	78912252	2223	269	LTL	5.30838e-05	0.0142768
1685	11	78912253	79802286	2086	275	LTL	2.72001e-05	0.12382
1686	11	79802287	80726012	2245	256	LTL	8.8339e-06	0.338386
1687	11	80726013	81658298	2726	215	LTL	6.75865e-05	0.0012998
1688	11	81658299	82833181	2969	208	LTL	8.09601e-05	0.000164538
1689	11	82833182	83677773	1803	177	LTL	5.30141e-05	0.00438109
1690	11	83677774	84613229	1942	195	LTL	3.13624e-05	0.0606711
1692	11	85869060	86629333	2020	195	LTL	2.05262e-05	0.148633
1694	11	87676871	88359287	1806	170	LTL	3.50374e-05	0.0339544
1695	11	88359288	89209738	1802	98	LTL	2.34863e-05	0.053455
1698	11	90967062	92209168	2783	198	LTL	3.84529e-05	0.031476
1699	11	92209169	93576641	2627	239	LTL	7.70393e-05	0.000587734
1700	11	93576642	94384535	1809	149	LTL	7.18558e-05	0.000114201
1701	11	94384536	95327210	1880	244	LTL	7.05532e-05	0.0014915
1702	11	95327211	96150134	1871	234	LTL	3.32257e-05	0.0662072
1703	11	96150135	97091671	1858	204	LTL	7.08011e-05	0.000664544
1704	11	97091672	98145570	2875	217	LTL	3.04775e-05	0.075427
1705	11	98145571	98929380	2533	189	LTL	1.28778e-05	0.246832
1706	11	98929381	99619347	2448	177	LTL	2.21704e-05	0.12063
1707	11	99619348	100423901	2000	225	LTL	2.84978e-05	0.0923321
1708	11	100423902	101152831	2197	178	LTL	9.24891e-06	0.301878
1709	11	101152832	101881252	1969	152	LTL	3.75968e-05	0.0204082
1710	11	101881253	102671665	1857	223	LTL	6.4644e-05	0.00219942
1711	11	102671666	103495635	2491	174	LTL	4.18502e-05	0.0166683
1712	11	103495636	104875270	2930	189	LTL	8.92757e-08	0.484486
1713	11	104875271	105932282	1932	124	LTL	3.24763e-05	0.0253463
1714	11	105932283	107054024	2343	219	LTL	5.43848e-05	0.00713802
1715	11	107054025	107846824	2275	165	LTL	0.000157253	2.63107e-12
1716	11	107846825	109891837	3112	266	LTL	0.000810693	1.58048e-98
1717	11	109891838	111117780	2580	233	LTL	3.81445e-05	0.0431145
1718	11	111117781	112755446	2767	245	LTL	9.94309e-05	2.66866e-05
1719	11	112755447	113889019	2483	231	LTL	4.82246e-05	0.0160797
1720	11	113889020	114742317	1830	241	LTL	8.31533e-05	0.000265321
1721	11	114742318	116247377	3004	308	LTL	3.59815e-05	0.0765453
1722	11	116247378	117295641	2814	260	LTL	3.96053e-05	0.045438
1723	11	117295642	118901213	3675	328	LTL	0.000100819	0.000141096
1724	11	118901214	120064528	2393	277	LTL	8.95238e-05	0.000235152
1725	11	120064529	121208186	2338	289	LTL	7.9538e-05	0.00102099
1726	11	121208187	122589224	2710	295	LTL	9.32701e-05	0.000203153
1727	11	122589225	123398882	2135	286	LTL	0.000157532	5.75256e-09
1728	11	123398883	124403477	2870	200	LTL	5.72372e-05	0.00380188
1729	11	124403478	125266684	1921	284	LTL	0.000115207	6.99689e-06
1730	11	125266685	126304240	2569	235	LTL	6.7986e-05	0.00176878
1731	11	126304241	127306871	2621	290	LTL	9.74944e-05	0.000104827
1733	11	128262551	129451784	2493	305	LTL	0.000144875	1.13505e-07
1734	11	129451785	130500783	2396	288	LTL	0.000124666	1.79106e-06
1735	11	130500784	131424361	2232	313	LTL	0.000116868	1.1612e-05
1736	11	131424362	132584401	2823	316	LTL	4.58784e-05	0.0378551
1737	11	132584402	133521642	2372	321	LTL	8.10944e-05	0.00134339
1738	11	133521643	134351064	1869	293	LTL	8.44699e-05	0.000598213
1739	11	134351065	134946450	2279	235	LTL	7.79286e-05	0.000480554
1740	12	60317	1078397	2067	278	LTL	0.000224858	2.98517e-15
1741	12	1078398	1942426	2267	258	LTL	3.76044e-05	0.053029
1742	12	1942427	3069506	2467	300	LTL	7.57831e-05	0.00184694
1743	12	3069507	3871114	2357	310	LTL	0.000136965	4.93766e-07
1744	12	3871115	4967643	2421	316	LTL	0.000227167	2.46618e-14
1745	12	4967644	6023700	2480	311	LTL	4.78647e-06	0.41357
1746	12	6023701	6948954	2079	281	LTL	9.58567e-05	0.000108462
1747	12	6948955	8123317	2369	250	LTL	0.000116424	2.01209e-06
1748	12	8123318	8760628	959	144	LTL	4.12877e-05	0.0113178
1749	12	8760629	10176713	2912	260	LTL	8.24161e-05	0.000433028
1750	12	10176714	10946140	1828	202	LTL	7.63012e-05	0.000284091
1751	12	10946141	11742149	1860	122	LTL	4.6171e-06	0.368574
1752	12	11742150	12721874	2275	294	LTL	0.000243544	1.35578e-16
1753	12	12721875	13559527	1751	278	LTL	6.58364e-05	0.00420494
1754	12	13559528	14656849	2702	254	LTL	7.47953e-05	0.00103744
1755	12	14656850	16136742	2272	250	LTL	3.18356e-05	0.0804438
1756	12	16136743	17374895	1952	260	LTL	0.000105359	1.62774e-05
1757	12	17374896	18470023	2684	188	LTL	4.58618e-05	0.0126069
1759	12	19532766	20074930	1978	164	LTL	2.07448e-05	0.126923
1760	12	20074931	20866285	2009	250	LTL	2.14026e-05	0.167451
1761	12	20866286	21572252	2170	132	LTL	9.10939e-06	0.277199
1762	12	21572253	22928055	2509	250	LTL	2.49505e-05	0.132554
1763	12	22928056	23923798	1939	267	LTL	3.56213e-05	0.0652775
1764	12	23923799	25058714	2799	296	LTL	0.000211734	1.90037e-13
1765	12	25058715	25990813	2503	245	LTL	5.67287e-05	0.0076253
1766	12	25990814	26958056	2649	239	LTL	0.000182933	2.35227e-12
1767	12	26958057	27797262	2126	174	LTL	5.96801e-05	0.00165157
1768	12	27797263	28753585	2142	210	LTL	2.65945e-05	0.0996503
1769	12	28753586	29647193	2419	162	LTL	2.28198e-05	0.104934
1770	12	29647194	30358377	2173	231	LTL	4.09273e-05	0.0329331
1771	12	30358378	31067298	2396	148	LTL	2.47339e-05	0.0795743
1772	12	31067299	31797152	1783	181	LTL	2.03806e-05	0.141839
1773	12	31797153	32368905	1976	196	LTL	5.43037e-05	0.00514287
1774	12	32368906	33076722	2148	178	LTL	1.15071e-06	0.461597
1778	12	38746761	40017396	2339	114	LTL	2.28215e-06	0.422765
1779	12	40017397	41198229	3027	183	LTL	3.72117e-05	0.0308756
1780	12	41198230	42117736	2413	153	LTL	3.0508e-05	0.0461267
1781	12	42117737	43072679	2047	169	LTL	9.06143e-05	8.54844e-06
1782	12	43072680	43980531	2402	174	LTL	4.9864e-05	0.00625734
1784	12	44923826	46037744	1823	176	LTL	5.94412e-05	0.00178591
1785	12	46037745	47499603	2461	217	LTL	4.71724e-05	0.0154761
1786	12	47499604	48227035	2040	217	LTL	2.08211e-05	0.157542
1788	12	48960266	50344346	2237	226	LTL	6.77029e-05	0.00156921
1789	12	50344347	51769419	2319	159	LTL	7.99695e-05	3.9584e-05
1790	12	51769420	53039987	3100	300	LTL	7.12268e-05	0.00305594
1791	12	53039988	54371448	2767	250	LTL	3.48703e-05	0.0633283
1792	12	54371449	55416802	2047	247	LTL	0.000229639	7.46663e-17
1793	12	55416803	56987105	2241	232	LTL	3.31199e-05	0.066025
1794	12	56987106	58748139	2525	221	LTL	0.000128422	7.13615e-08
1795	12	58748140	60000363	2784	210	LTL	3.29089e-05	0.0585912
1796	12	60000364	61737953	3437	170	LTL	1.78865e-05	0.164185
1799	12	63764112	64403857	1480	125	LTL	3.48791e-05	0.0188746
1800	12	64403858	66114643	2391	269	LTL	4.41342e-05	0.0326818
1801	12	66114644	67183620	2083	246	LTL	4.8016e-05	0.0189845
1802	12	67183621	68006682	2015	198	LTL	3.19426e-05	0.0587931
1803	12	68006683	68839661	1892	233	LTL	7.15167e-05	0.00108727
1804	12	68839662	70097805	3063	276	LTL	6.71647e-05	0.00354477
1805	12	70097806	71177961	2910	208	LTL	8.92402e-06	0.320724
1806	12	71177962	71948185	1842	163	LTL	3.15786e-05	0.0455296
1807	12	71948186	73154515	1999	196	LTL	5.78634e-05	0.00327558
1809	12	74080748	75563968	3167	173	LTL	1.45221e-05	0.212319
1810	12	75563969	76524573	2001	247	LTL	3.11861e-05	0.0833544
1811	12	76524574	77800463	2911	242	LTL	7.59043e-05	0.000724282
1812	12	77800464	79315178	3329	294	LTL	6.83916e-05	0.00386153
1813	12	79315179	80952472	2331	188	LTL	5.28245e-05	0.00543331
1814	12	80952473	81843890	1836	145	LTL	4.15838e-06	0.389009
1815	12	81843891	82576129	1802	135	LTL	1.83726e-06	0.439482
1816	12	82576130	83551125	1918	190	LTL	4.19434e-05	0.0200795
1817	12	83551126	84356775	2214	109	LTL	5.61986e-05	0.000399658
1818	12	84356776	85345631	2143	139	LTL	6.35501e-05	0.000337682
1819	12	85345632	86933476	2945	146	LTL	1.46574e-05	0.19146
1821	12	88344765	90567001	3100	248	LTL	0.000135322	6.64294e-08
1822	12	90567002	92061179	2947	216	LTL	8.37547e-05	0.000133149
1823	12	92061180	93487547	3176	271	LTL	0.000104437	2.51299e-05
1824	12	93487548	94385884	1951	255	LTL	2.90304e-06	0.437209
1825	12	94385885	95147845	2094	278	LTL	3.36308e-05	0.0799118
1826	12	95147846	96017782	2698	195	LTL	2.43989e-05	0.110221
1827	12	96017783	96828314	2031	246	LTL	7.86225e-05	0.000545905
1828	12	96828315	97814021	2487	208	LTL	4.52603e-05	0.0171842
1829	12	97814022	99244337	2899	276	LTL	3.08772e-05	0.0966139
1830	12	99244338	100931423	3103	268	LTL	6.51317e-05	0.00401402
1831	12	100931424	101825061	1919	219	LTL	7.92299e-06	0.341889
1832	12	101825062	102966633	2454	239	LTL	5.16965e-05	0.0121943
1833	12	102966634	104140831	2611	268	LTL	4.85877e-05	0.0217163
1834	12	104140832	105079100	2738	237	LTL	1.82943e-05	0.196787
1835	12	105079101	106153787	2624	228	LTL	6.42741e-05	0.00250253
1836	12	106153788	106964977	1805	233	LTL	1.87758e-05	0.189058
1837	12	106964978	108183188	2421	211	LTL	8.44324e-05	0.000104852
1838	12	108183189	109031819	2173	215	LTL	0.00013943	5.88007e-09
1839	12	109031820	110111514	2287	213	LTL	9.91224e-05	1.03459e-05
1840	12	110111515	111592381	1926	185	LTL	9.89897e-05	3.6026e-06
1841	12	111592382	113947983	3008	247	LTL	0.000182192	4.77689e-12
1842	12	113947984	114685670	2223	219	LTL	7.52272e-05	0.000496521
1843	12	114685671	115439451	1984	250	LTL	5.67122e-05	0.00809871
1844	12	115439452	116197675	2007	267	LTL	0.000104272	2.32093e-05
1845	12	116197676	117091843	2053	265	LTL	6.70418e-05	0.00311253
1846	12	117091844	118256124	2657	295	LTL	8.1611e-05	0.000873518
1847	12	118256125	119301061	2424	246	LTL	0.000109046	5.97399e-06
1848	12	119301062	120567740	2675	282	LTL	4.34555e-05	0.037727
1849	12	120567741	121817509	2949	219	LTL	0.000151844	5.57547e-10
1850	12	121817510	123396634	2563	209	LTL	0.000166878	1.02641e-11
1851	12	123396635	124843768	2891	229	LTL	0.000141971	7.49452e-09
1852	12	124843769	126079935	3309	357	LTL	0.00018123	1.49564e-09
1853	12	126079936	126871452	2151	229	LTL	6.3815e-05	0.00269117
1855	12	127545378	128372588	2175	291	LTL	6.67562e-05	0.00444036
1856	12	128372589	129170296	2304	311	LTL	0.000175852	5.79873e-10
1857	12	129170297	129887418	2301	312	LTL	0.000119833	7.34656e-06
1858	12	129887419	130629840	2226	312	LTL	8.35476e-06	0.359642
1859	12	130629841	131404042	2516	308	LTL	0.00016774	2.28196e-09
1860	12	131404043	132012316	1830	217	LTL	3.67725e-05	0.0434384
1861	12	132012317	132957945	1643	224	LTL	3.05384e-05	0.0780404
1862	12	132957946	133841814	1949	188	LTL	0.000198109	7.12977e-16
1863	13	19020095	19648628	719	77	LTL	7.74547e-06	0.254619
1864	13	19648629	20491181	2404	116	LTL	4.23882e-06	0.374597
1865	13	20491182	21540733	2588	269	LTL	7.50196e-05	0.00129049
1866	13	21540734	22795188	3076	337	LTL	8.6678e-05	0.000887913
1867	13	22795189	23729049	3124	312	LTL	1.82236e-05	0.228113
1868	13	23729050	24818333	3617	315	LTL	8.92469e-05	0.000476282
1869	13	24818334	25977140	3151	268	LTL	0.000146552	1.9925e-08
1870	13	25977141	26681709	1869	193	LTL	4.66243e-05	0.0123338
1871	13	26681710	27392005	1885	187	LTL	3.64667e-05	0.0346887
1872	13	27392006	28587125	3448	311	LTL	6.77958e-05	0.00496445
1873	13	28587126	30068525	3320	305	LTL	0.000148027	6.64826e-08
1874	13	30068526	31433218	3541	315	LTL	8.42507e-05	0.00086193
1875	13	31433219	32986686	3524	313	LTL	6.74101e-05	0.00527203
1877	13	34722392	35744568	2046	214	LTL	6.2471e-05	0.0024838
1878	13	35744569	36579413	2043	212	LTL	8.90544e-05	5.22865e-05
1879	13	36579414	37499810	1921	206	LTL	6.85313e-05	0.000953966
1880	13	37499811	38290689	2018	151	LTL	5.34002e-06	0.365732
1881	13	38290690	39381743	2150	200	LTL	5.38353e-05	0.005801
1882	13	39381744	40091623	2158	168	LTL	4.73459e-07	0.475174
1883	13	40091624	41003943	2139	268	LTL	5.26008e-05	0.0148287
1884	13	41003944	42037054	1667	203	LTL	0.000262076	9.59617e-23
1885	13	42037055	42950157	2044	176	LTL	1.39775e-05	0.222359
1886	13	42950158	43931931	2105	247	LTL	9.38837e-05	6.518e-05
1887	13	43931932	45476446	3011	272	LTL	8.43312e-05	0.000422526
1888	13	45476447	46493236	1980	224	LTL	4.82984e-05	0.0148252
1889	13	46493237	47433528	1878	218	LTL	2.29288e-05	0.136213
1890	13	47433529	48137479	1905	172	LTL	1.93346e-05	0.147957
1891	13	48137480	49381727	2672	181	LTL	2.21222e-05	0.12355
1892	13	49381728	50419896	2206	194	LTL	3.6778e-05	0.035883
1893	13	50419897	51554236	2133	208	LTL	0.000166532	1.03143e-11
1894	13	51554237	53336571	2735	254	LTL	8.52038e-05	0.000264052
1895	13	53336572	54684856	2958	247	LTL	4.27828e-05	0.03143
1897	13	55576913	56434007	1925	96	LTL	6.95979e-06	0.294464
1898	13	56434008	58245843	2548	168	LTL	7.2501e-05	0.000196521
1899	13	58245844	59751795	3124	177	LTL	3.48588e-05	0.0371457
1900	13	59751796	61268155	3351	243	LTL	2.88146e-05	0.0979344
1905	13	65187139	66382286	2167	195	LTL	1.31563e-05	0.24577
1906	13	66382287	67718879	2575	222	LTL	4.61566e-05	0.01815
1907	13	67718880	69004702	2452	215	LTL	3.31083e-05	0.0595212
1908	13	69004703	69751491	2434	127	LTL	3.24563e-05	0.0266171
1909	13	69751492	70427880	1959	123	LTL	3.92388e-06	0.385548
1910	13	70427881	71010208	1833	162	LTL	4.76362e-05	0.00677095
1911	13	71010209	71976862	2584	250	LTL	8.24226e-05	0.000354985
1912	13	71976863	73114509	2264	251	LTL	8.06537e-05	0.000459349
1913	13	73114510	74437635	3271	275	LTL	0.000183091	2.2216e-11
1914	13	74437636	75882384	3392	297	LTL	3.31772e-05	0.089198
1915	13	75882385	76671493	2013	180	LTL	3.83508e-05	0.0265024
1916	13	76671494	77460044	1981	203	LTL	3.32912e-05	0.0538936
1918	13	78693311	79489045	1903	189	LTL	4.00104e-05	0.0244619
1919	13	79489046	80778339	2354	237	LTL	0.000109506	4.11304e-06
1920	13	80778340	81724089	2213	163	LTL	4.42985e-05	0.0105722
1921	13	81724090	82582821	2103	156	LTL	5.89448e-05	0.00119109
1922	13	82582822	83829835	2733	140	LTL	2.61874e-05	0.0640458
1923	13	83829836	85035400	2441	200	LTL	6.47942e-06	0.361284
1924	13	85035401	85650680	1853	117	LTL	1.56823e-05	0.151612
1925	13	85650681	86321288	1810	129	LTL	7.98327e-06	0.297945
1926	13	86321289	87043588	1790	109	LTL	1.54423e-06	0.440531
1928	13	88029524	88968400	1864	164	LTL	3.85544e-06	0.401756
1929	13	88968401	89764426	2007	101	LTL	3.81653e-05	0.00693407
1930	13	89764427	90518147	1907	142	LTL	2.373e-05	0.0836963
1931	13	90518148	91764204	3201	236	LTL	6.7962e-05	0.00180406
1932	13	91764205	93285142	3292	271	LTL	3.99071e-05	0.0473599
1933	13	93285143	94925136	3553	283	LTL	5.92709e-05	0.008842
1934	13	94925137	96132647	3485	314	LTL	0.000130445	1.55944e-06
1935	13	96132648	97516609	2386	169	LTL	2.75688e-05	0.0713029
1936	13	97516610	98527335	1813	204	LTL	4.13153e-05	0.0249226
1937	13	98527336	99402294	2220	289	LTL	5.90486e-05	0.00958779
1938	13	99402295	100470868	2621	201	LTL	4.35153e-05	0.0191712
1939	13	100470869	101573736	2186	255	LTL	5.40719e-05	0.0112829
1940	13	101573737	103050417	3510	312	LTL	4.53133e-05	0.0387169
1941	13	103050418	104378435	3582	292	LTL	0.000112794	1.24698e-05
1942	13	104378436	105672500	3076	294	LTL	0.000123947	2.40257e-06
1943	13	105672501	106313847	1718	212	LTL	3.55646e-05	0.0467556
1944	13	106313848	107037864	1836	245	LTL	4.98489e-05	0.0156751
1945	13	107037865	108521978	3515	361	LTL	6.73738e-05	0.00820642
1946	13	108521979	109156765	1780	219	LTL	7.25549e-05	0.000719457
1947	13	109156766	109813576	1941	217	LTL	6.23107e-05	0.00266714
1948	13	109813577	110995432	3424	337	LTL	0.000186543	2.53281e-10
1949	13	110995433	111621244	1905	260	LTL	5.11778e-05	0.0158352
1950	13	111621245	112319064	2099	238	LTL	1.23567e-05	0.277789
1951	13	112319065	113573118	2622	311	LTL	0.000113634	1.76174e-05
1952	13	113573119	114302561	1736	239	LTL	0.000102188	1.4526e-05
1953	13	114302562	115109851	1525	180	LTL	3.7053e-05	0.0304394
1954	14	19000059	20876080	1459	173	LTL	8.033e-05	6.25641e-05
1955	14	20876081	21982654	2738	366	LTL	0.000259798	5.38832e-16
1956	14	21982655	22760700	2852	239	LTL	4.78265e-05	0.0181192
1957	14	22760701	23985936	2782	335	LTL	0.00016289	1.55973e-08
1958	14	23985937	24906056	1804	254	LTL	0.000154867	2.11531e-09
1959	14	24906057	25585041	1846	162	LTL	6.80592e-05	0.000336481
1960	14	25585042	26395690	1747	191	LTL	0.000110431	5.44628e-07
1961	14	26395691	27720240	2566	277	LTL	1.04347e-05	0.319964
1962	14	27720241	29029224	3254	216	LTL	7.38406e-06	0.35025
1963	14	29029225	30831154	2981	307	LTL	6.09432e-05	0.00942908
1964	14	30831155	32382245	2888	231	LTL	6.40965e-05	0.00268364
1965	14	32382246	33591113	2774	325	LTL	0.000118889	1.1577e-05
1966	14	33591114	34695195	2767	369	LTL	0.000120617	2.35121e-05
1967	14	34695196	35379988	1824	183	LTL	4.29045e-05	0.0165861
1968	14	35379989	36422077	2006	156	LTL	4.69929e-05	0.00660578
1969	14	36422078	37282012	1850	208	LTL	6.99891e-05	0.000813142
1970	14	37282013	38722114	2578	230	LTL	5.76734e-05	0.0056712
1971	14	38722115	40343754	3335	214	LTL	7.4609e-05	0.000484741
1972	14	40343755	40965849	1913	94	LTL	7.31714e-06	0.284079
1973	14	40965850	41614833	2024	81	LTL	9.06316e-06	0.229133
1974	14	41614834	42562550	1752	137	LTL	1.26882e-05	0.215667
1975	14	42562551	43321168	1967	139	LTL	4.91859e-05	0.00337991
1976	14	43321169	44623273	3366	203	LTL	1.64051e-07	0.483547
1977	14	44623274	45817082	2404	192	LTL	5.78737e-05	0.00304434
1978	14	45817083	46748238	1678	119	LTL	2.44659e-05	0.0621778
1979	14	46748239	48177483	3066	200	LTL	7.45808e-05	0.000349026
1980	14	48177484	49002065	2385	152	LTL	3.69241e-05	0.0221148
1981	14	49002066	50500564	3049	263	LTL	5.50004e-05	0.0111361
1982	14	50500565	51418371	1847	200	LTL	7.96191e-05	0.000162661
1983	14	51418372	52206122	2033	232	LTL	3.27297e-05	0.0681883
1984	14	52206123	52760553	1839	204	LTL	1.55451e-05	0.215769
1985	14	52760554	54359598	3152	268	LTL	3.78227e-05	0.0551395
1986	14	54359599	55292832	1770	231	LTL	5.01981e-05	0.0130912
1987	14	55292833	56206430	1934	139	LTL	3.19129e-05	0.0335951
1988	14	56206431	57460781	3168	298	LTL	0.00014016	1.96531e-07
1989	14	57460782	58447798	2159	215	LTL	3.14112e-05	0.0689102
1990	14	58447799	59447537	1943	229	LTL	5.57456e-05	0.00697313
1993	14	61652817	62717985	2335	267	LTL	7.24884e-05	0.00169645
1994	14	62717986	64033237	3125	246	LTL	8.69472e-06	0.337635
1995	14	64033238	65229391	2281	176	LTL	9.92322e-05	2.3064e-06
1996	14	65229392	66300066	2538	202	LTL	0.000275726	1.58033e-24
1999	14	68976913	69794542	1994	238	LTL	3.81837e-05	0.044486
2000	14	69794543	71140426	3199	250	LTL	5.49532e-06	0.39178
2001	14	71140427	72665319	3127	242	LTL	6.94583e-05	0.00165381
2002	14	72665320	73373373	1810	231	LTL	0.000337172	1.41376e-30
2003	14	73373374	74245428	1758	144	LTL	0.000474476	2.28702e-60
2004	14	74245429	75699501	2760	219	LTL	0.000167878	1.68395e-11
2005	14	75699502	76694201	2020	255	LTL	9.93381e-05	3.55101e-05
2006	14	76694202	77425453	1859	264	LTL	9.42984e-05	9.25405e-05
2007	14	77425454	78374053	2709	218	LTL	2.69187e-05	0.100988
2008	14	78374054	79199451	1988	219	LTL	7.41519e-05	0.000577008
2009	14	79199452	81001920	3354	303	LTL	4.30971e-06	0.419973
2010	14	81001921	82524785	3464	264	LTL	4.5751e-07	0.480468
2011	14	82524786	84087372	3541	275	LTL	1.78332e-05	0.218966
2012	14	84087373	85562936	3422	233	LTL	7.38433e-05	0.000800572
2013	14	85562937	86653343	2522	233	LTL	1.90307e-05	0.18603
2014	14	86653344	87350275	1763	160	LTL	6.87824e-05	0.000281107
2015	14	87350276	88208595	1934	156	LTL	3.83496e-05	0.0197213
2016	14	88208596	89482883	2836	216	LTL	5.99904e-05	0.00350294
2017	14	89482884	90662836	2684	312	LTL	0.000107285	4.38292e-05
2018	14	90662837	92101228	3129	293	LTL	0.000261816	1.65629e-18
2019	14	92101229	93386328	3398	314	LTL	0.000105694	5.67861e-05
2020	14	93386329	94892240	3746	311	LTL	7.75233e-05	0.0017562
2022	14	95946793	97174314	3406	325	LTL	0.000304551	8.24384e-22
2023	14	97174315	98268391	2520	287	LTL	3.85208e-05	0.0577026
2024	14	98268392	98885322	1963	172	LTL	3.56248e-05	0.032572
2026	14	99474534	100786189	2932	329	LTL	3.60887e-05	0.0823613
2027	14	100786190	102004377	2810	350	LTL	8.14577e-05	0.00184732
2028	14	102004378	103617472	3267	263	LTL	4.06538e-05	0.0423781
2029	14	103617473	104439106	1929	168	LTL	6.56755e-05	0.000583339
2030	14	104439107	105091340	1686	229	LTL	6.86667e-05	0.00146234
2031	14	105091341	106347143	1555	195	LTL	5.58464e-05	0.00416791
2034	15	20000205	22799926	42	6	LTL	1.39686e-06	0.285223
2035	15	22799927	24099946	873	174	LTL	2.99543e-05	0.0590461
2036	15	24099947	24531187	1872	118	LTL	2.61766e-05	0.0504286
2037	15	24531188	25384327	2758	185	LTL	7.61538e-06	0.334813
2038	15	25384328	26392947	2842	322	LTL	7.79232e-05	0.00193181
2039	15	26392948	27563172	2623	314	LTL	8.39829e-05	0.000876455
2040	15	27563173	29141035	2107	226	LTL	7.58591e-05	0.000528823
2041	15	29141036	30604119	2511	260	LTL	8.71356e-05	0.000229887
2042	15	30604120	32177320	2481	269	LTL	5.82136e-05	0.00852702
2043	15	32177321	33484267	2353	281	LTL	8.2138e-05	0.000654113
2044	15	33484268	34410072	2754	300	LTL	0.000120297	4.99865e-06
2045	15	34410073	35118927	1545	197	LTL	0.000117875	1.71518e-07
2046	15	35118928	36583327	3001	284	LTL	7.44246e-05	0.00173179
2047	15	36583328	37962915	3062	314	LTL	5.78744e-05	0.0133673
2048	15	37962916	39238840	2835	300	LTL	5.90975e-05	0.0105712
2049	15	39238841	40604780	2852	280	LTL	0.000115252	6.21077e-06
2050	15	40604781	42332685	3020	239	LTL	0.000322249	3.90622e-28
2051	15	42332686	44987755	2958	223	LTL	3.86098e-05	0.0383754
2052	15	44987756	46022642	1820	178	LTL	3.90926e-05	0.0239052
2053	15	46022643	46884071	1757	175	LTL	3.85875e-05	0.0244121
2054	15	46884072	47693316	1868	120	LTL	1.30852e-05	0.194463
2055	15	47693317	49260006	2400	232	LTL	0.000114477	1.46987e-06
2056	15	49260007	50195876	1863	100	LTL	0.000131919	1.48796e-12
2057	15	50195877	51605477	3147	192	LTL	0.000448899	5.35853e-50
2058	15	51605478	53263126	3235	256	LTL	4.8994e-05	0.0188849
2059	15	53263127	54332799	2807	234	LTL	7.03003e-05	0.00129583
2060	15	54332800	55136717	2599	200	LTL	3.24374e-05	0.0570127
2061	15	55136718	56322588	3370	230	LTL	0.000127336	1.32731e-07
2062	15	56322589	57641164	2495	176	LTL	4.6986e-05	0.00928243
2063	15	57641165	58712954	2933	318	LTL	7.6755e-05	0.00208829
2064	15	58712955	59901116	2367	280	LTL	4.55419e-05	0.0311829
2065	15	59901117	61130595	2508	285	LTL	3.97e-06	0.42307
2066	15	61130596	62106138	2427	311	LTL	0.000152241	4.02108e-08
2067	15	62106139	63218978	2479	289	LTL	6.62843e-05	0.00456275
2068	15	63218979	64339945	2594	223	LTL	0.000106589	4.13057e-06
2069	15	64339946	66355634	3122	240	LTL	0.000121281	6.04504e-07
2070	15	66355635	67396520	2887	285	LTL	0.000101773	5.19448e-05
2071	15	67396521	69089815	3174	289	LTL	1.54692e-05	0.253882
2072	15	69089816	70767983	3380	341	LTL	8.30354e-05	0.00140075
2073	15	70767984	72058129	2437	269	LTL	0.000104293	2.43795e-05
2074	15	72058130	73375718	1652	159	LTL	2.31689e-05	0.099802
2075	15	73375719	74458113	2009	211	LTL	0.000188641	7.08238e-14
2076	15	74458114	76401952	2769	248	LTL	9.56157e-05	5.16746e-05
2077	15	76401953	77897163	2333	153	LTL	3.13722e-05	0.0420383
2078	15	77897164	78514101	1579	180	LTL	3.55239e-05	0.0357121
2079	15	78514102	79292536	1740	195	LTL	5.61871e-05	0.00399124
2080	15	79292537	79998206	1773	216	LTL	6.65524e-05	0.00151877
2081	15	79998207	81077025	2667	275	LTL	0.000141115	7.11905e-08
2082	15	81077026	82191077	1838	254	LTL	7.64557e-05	0.000840337
2083	15	82191078	84209760	2469	231	LTL	9.38084e-05	4.2979e-05
2084	15	84209761	85494083	2162	210	LTL	5.03034e-05	0.0101047
2086	15	86341599	87158587	2491	230	LTL	4.60531e-05	0.0198559
2087	15	87158588	88035757	2279	244	LTL	5.11743e-05	0.0135649
2088	15	88035758	89385187	2563	325	LTL	3.77609e-05	0.0723377
2089	15	89385188	90632718	2524	300	LTL	4.31012e-05	0.0431777
2090	15	90632719	91593623	2276	236	LTL	4.82391e-05	0.0168833
2091	15	91593624	92675405	2576	314	LTL	3.84212e-05	0.0659532
2092	15	92675406	93707010	2962	328	LTL	8.08278e-05	0.00151514
2093	15	93707011	94565521	2752	316	LTL	9.23633e-05	0.000330804
2094	15	94565522	95662425	2754	340	LTL	0.000176798	1.67606e-09
2095	15	95662426	96864278	2628	325	LTL	5.62559e-05	0.016825
2096	15	96864279	98025684	2433	315	LTL	6.32586e-05	0.00811267
2097	15	98025685	98828261	2476	275	LTL	4.45289e-05	0.032903
2098	15	98828262	99925972	2876	321	LTL	5.71355e-05	0.0151029
2099	15	99925973	100742117	2425	257	LTL	0.000155275	2.2719e-09
2100	15	100742118	101550750	2472	267	LTL	7.15326e-05	0.0019003
2101	15	101550751	102520975	2261	309	LTL	5.3615e-05	0.0188879
2102	16	60169	1049079	2368	276	LTL	0.000155462	5.41956e-09
2103	16	1049080	1996492	2777	272	LTL	7.69096e-06	0.360747
2104	16	1996493	3379996	2060	315	LTL	0.000180946	2.67192e-10
2105	16	3379997	4816145	2996	324	LTL	0.000261655	2.04215e-17
2106	16	4816146	5782968	3196	337	LTL	5.41327e-05	0.0219214
2107	16	5782969	6446081	2155	327	LTL	5.00095e-05	0.0289427
2108	16	6446082	7051429	2673	292	LTL	1.50873e-05	0.259887
2109	16	7051430	7704354	2758	284	LTL	0.000100812	5.81546e-05
2110	16	7704355	8341012	2688	275	LTL	7.76564e-05	0.00102983
2111	16	8341013	9104469	2641	286	LTL	8.84369e-05	0.00032155
2112	16	9104470	9754796	1939	254	LTL	5.80346e-05	0.00735869
2113	16	9754797	10351808	1910	189	LTL	7.26898e-06	0.34281
2114	16	10351809	11022542	1821	259	LTL	0.000103128	2.22785e-05
2115	16	11022543	11916631	2596	263	LTL	0.000108548	1.08189e-05
2116	16	11916632	12793149	2682	273	LTL	5.83794e-05	0.00874193
2117	16	12793150	13893407	3388	285	LTL	0.000109641	1.66281e-05
2118	16	13893408	15921108	2473	272	LTL	0.000204944	1.72281e-13
2119	16	15921109	17343277	2390	260	LTL	7.2707e-05	0.00148326
2120	16	17343278	19104257	2607	254	LTL	8.1083e-05	0.000460034
2121	16	19104258	20351261	2896	272	LTL	7.39946e-05	0.00152858
2122	16	20351262	22667048	2383	258	LTL	2.97252e-05	0.0976084
2123	16	22667049	24014705	2971	279	LTL	8.11943e-05	0.000711303
2124	16	24014706	25235251	2636	312	LTL	0.00016913	2.10003e-09
2125	16	25235252	26154122	2651	267	LTL	7.99681e-05	0.000675698
2126	16	26154123	27443061	3471	344	LTL	0.000147305	2.69969e-07
2127	16	27443062	29043177	1907	262	LTL	9.44578e-05	8.63677e-05
2128	16	29043178	31384210	2044	253	LTL	6.78504e-05	0.00238996
2129	16	31384211	32847928	855	93	LTL	4.51326e-05	0.0016127
2130	16	32847929	35259453	77	26	LTL	2.77744e-05	0.00104912
2131	16	35259454	49010761	2478	224	LTL	0.000115558	8.8951e-07
2132	16	49010762	50467033	3002	317	LTL	0.000377805	1.64071e-30
2133	16	50467034	52041336	3049	328	LTL	0.000102668	0.000111364
2134	16	52041337	53393882	2811	265	LTL	6.01744e-05	0.00664203
2135	16	53393883	54866095	3470	347	LTL	6.39271e-05	0.0100302
2136	16	54866096	55907389	2780	279	LTL	1.85123e-05	0.212437
2137	16	55907390	57119889	2979	285	LTL	7.25279e-05	0.00218332
2138	16	57119890	58508978	3527	328	LTL	0.00011773	1.46249e-05
2139	16	58508979	59885499	3362	251	LTL	5.87462e-05	0.00657502
2140	16	59885500	61092844	2691	231	LTL	4.61571e-06	0.403181
2141	16	61092845	62607090	2516	250	LTL	2.0151e-05	0.181143
2142	16	62607091	64207176	3086	264	LTL	8.0496e-05	0.000598857
2143	16	64207177	65072403	2111	158	LTL	1.44454e-05	0.203449
2144	16	65072404	65882820	1764	206	LTL	6.33696e-05	0.00191534
2145	16	65882821	66738843	1884	241	LTL	0.000140727	1.74314e-08
2146	16	66738844	68435728	1832	145	LTL	0.000217815	8.9055e-21
2147	16	68435729	69549149	1971	194	LTL	0.000207089	1.27082e-16
2148	16	69549150	71062712	1567	170	LTL	0.000230649	8.70492e-21
2149	16	71062713	72089511	1649	148	LTL	9.39635e-05	1.59352e-06
2150	16	72089512	73140781	1630	223	LTL	0.000190518	1.23048e-13
2151	16	73140782	74135275	2228	324	LTL	0.000131359	1.79481e-06
2152	16	74135276	74889127	1570	189	LTL	0.000384922	1.1695e-40
2153	16	74889128	75525959	1628	187	LTL	9.51279e-05	7.90377e-06
2154	16	75525960	76635467	2830	234	LTL	4.22585e-05	0.0297758
2156	16	77270666	77739132	1760	182	LTL	1.86009e-05	0.163086
2157	16	77739133	78280636	2219	250	LTL	9.20715e-05	9.15969e-05
2159	16	78973581	79662634	2434	343	LTL	0.000142958	5.16461e-07
2160	16	79662635	80559685	2833	262	LTL	3.49974e-05	0.0668101
2161	16	80559686	81437861	2770	291	LTL	4.1907e-05	0.0451693
2162	16	81437862	82310204	2792	329	LTL	0.000631196	1.92758e-63
2163	16	82310205	83077869	2885	307	LTL	8.9718e-05	0.000394773
2164	16	83077870	83778371	2814	303	LTL	3.77681e-05	0.0658937
2165	16	83778372	84440154	2812	343	LTL	8.21545e-05	0.00157912
2166	16	84440155	85146805	2790	330	LTL	9.6045e-05	0.000265164
2167	16	85146806	86058597	2429	369	LTL	0.000110305	8.78178e-05
2168	16	86058598	86748867	2646	351	LTL	8.64633e-05	0.00109192
2169	16	86748868	87669168	2726	328	LTL	5.73885e-05	0.0155657
2170	16	87669169	88387228	2411	282	LTL	0.000325854	3.75664e-26
2171	16	88387229	89106304	2057	291	LTL	8.09751e-05	0.000886306
2172	16	89106305	90292787	2772	253	LTL	0.000172108	6.03344e-11
2173	17	52	815653	1996	267	LTL	3.87854e-05	0.0507188
2174	17	815654	1480056	1938	306	LTL	0.00012952	1.42749e-06
2175	17	1480057	2699135	2512	306	LTL	0.00051489	5.62838e-49
2176	17	2699136	3430440	1840	247	LTL	8.78772e-05	0.000155959
2177	17	3430441	4463971	2561	311	LTL	6.09854e-05	0.00973587
2178	17	4463972	5573784	2797	250	LTL	4.82689e-05	0.019205
2179	17	5573785	6305078	2239	293	LTL	9.11658e-05	0.000257172
2180	17	6305079	7264458	2201	305	LTL	0.000118746	7.20811e-06
2181	17	7264459	8554763	2618	280	LTL	0.000779929	1.3236e-91
2182	17	8554764	9619356	2421	325	LTL	6.83655e-05	0.0054078
[truncated: 11,673 more rows]

## Sheet: Supplementary Table 5
Supplementary Table 5. Bivariate LAVA results between leukocyte telomere length and six cardiovascular diseases
Note: results of bivariate LAVA analysis, testing for local genetic signal between leukocyte telomere length and six cardiovascular diseases in regions with a P-value < 0.0001. Tests are two-sided. Only local correlations significant after false discovery rate (FDR) correction for multiple testing were deemed significant and interpreted. locus = index of given local genomic regions; chr = chromos…
P-values lower than an FDR threshold of 0.05 (FDR <0.05) are marked in dark blue.
locus	chr	start	stop	n_snps	n_pcs	Trait1	Trait2	rho	rho.lower	rho.upper	r2	r2.lower	r2.upper	p	FDR
13	1	10753428	11709173	1997	254	LTL	AF	0.0712679	-0.27271	0.42252	0.00507911	0	0.18465	0.670019	0.833321
36	1	38474037	40200950	3312	308	LTL	AF	-0.218897	-0.64018	0.15317	0.0479157	0	0.40983	0.228768	0.463725
38	1	41093876	41977966	2121	227	LTL	AF	0.0273863	-0.22243	0.27857	0.000750008	0	0.08668	0.824343	0.918922
54	1	62778734	64344226	3109	280	LTL	AF	0.494377	0.07872	1	0.244408	0.0077	1	0.0195507	0.153022
80	1	91870060	92904465	2059	207	LTL	AF	0.135553	-0.27883	0.57374	0.0183746	0	0.33025	0.493502	0.71774
97	1	110224231	111134062	1797	277	LTL	AF	0.148684	-0.15202	0.45767	0.022107	0	0.20947	0.315275	0.565429
100	1	113418038	114664387	1930	223	LTL	AF	0.0949882	-0.21293	0.40482	0.00902276	0	0.16754	0.526365	0.742383
101	1	114664388	116207297	3521	273	LTL	AF	0.404143	0.04229	0.82822	0.163332	0.00397	0.68594	0.030634	0.185316
102	1	116207298	117046311	1733	192	LTL	AF	0.305199	-0.04946	0.72685	0.0931461	0	0.52831	0.0968722	0.326686
156	1	202583885	204092537	3091	325	LTL	AF	-0.0491115	-0.32726	0.2289	0.00241194	0	0.11358	0.721185	0.857262
163	1	212347583	213958292	3510	289	LTL	AF	0.205295	-0.14211	0.59163	0.042146	0	0.35006	0.242808	0.480073
195	1	243048004	244723196	2674	302	LTL	AF	-0.484838	-0.83957	-0.17519	0.235068	0.03069	0.70487	0.00288843	0.0445886
203	2	1376546	1875060	1652	210	LTL	AF	0.0433319	-0.37377	0.47302	0.00187765	0	0.25378	0.827078	0.918922
212	2	7966710	8978798	1957	278	LTL	AF	0.0050519	-0.39118	0.38672	2.55217e-05	0	0.19701	0.978074	0.993735
213	2	8978799	9960670	1870	233	LTL	AF	0.118036	-0.30331	0.56684	0.0139325	0	0.33245	0.559837	0.7587
222	2	17241116	18656325	3628	258	LTL	AF	0.433312	0.10543	0.8228	0.18776	0.01202	0.677	0.0108485	0.100903
226	2	22429641	23538527	2268	257	LTL	AF	0.111354	-0.22195	0.46708	0.0123997	0	0.21991	0.508314	0.729898
251	2	45850048	46499326	1912	306	LTL	AF	0.0168829	-0.37225	0.42041	0.000285034	0	0.2162	0.928261	0.976208
267	2	59251997	60775066	3175	306	LTL	AF	-0.487974	-0.95732	-0.12272	0.238118	0.01542	0.91645	0.0107021	0.100903
271	2	64696090	65938002	2710	294	LTL	AF	0.066684	-0.20855	0.34716	0.00444676	0	0.12327	0.622962	0.808064
305	2	110097869	112644828	2459	262	LTL	AF	-0.484515	-0.85	-0.18154	0.234755	0.03308	0.72251	0.0029676	0.0447572
381	2	202504863	203639686	1811	210	LTL	AF	0.131852	-0.20667	0.48282	0.0173851	0	0.23387	0.426732	0.660372
393	2	215899571	217566011	3534	333	LTL	AF	0.646813	0.36609	0.98229	0.418368	0.13402	0.9649	1.9134e-05	0.0010314
445	3	24270190	25516193	3523	316	LTL	AF	0.103307	-0.2157	0.43507	0.0106723	0	0.19166	0.515649	0.737526
483	3	71223282	72334704	2568	335	LTL	AF	0.293835	-0.07828	0.71282	0.0863392	0	0.50811	0.114814	0.338464
484	3	72334705	73606612	2576	313	LTL	AF	0.199841	-0.09573	0.51054	0.0399364	0	0.26065	0.177446	0.401035
532	3	125992651	127495173	3615	292	LTL	AF	0.139256	-0.25645	0.5805	0.0193922	0	0.34131	0.479376	0.707043
551	3	148638309	149998411	3262	297	LTL	AF	-0.0868873	-0.53019	0.33387	0.00754941	0	0.29989	0.668575	0.833321
552	3	149998412	151131307	2218	253	LTL	AF	-0.0940216	-0.56969	0.34607	0.00884005	0	0.33766	0.648492	0.822316
578	3	178110323	179372165	2549	226	LTL	AF	0.046599	-0.34585	0.45	0.00217147	0	0.22441	0.803967	0.90878
584	3	186602046	187939199	3290	345	LTL	AF	-0.172393	-0.63295	0.26009	0.0297194	0	0.40475	0.405019	0.643235
638	4	37880861	38984838	3079	295	LTL	AF	0.161507	-0.23236	0.61731	0.0260847	0	0.38307	0.416795	0.654261
640	4	39820062	40590541	1895	250	LTL	AF	-0.233963	-0.71244	0.17421	0.0547389	0	0.50757	0.252249	0.493341
698	4	109978983	111733579	3423	297	LTL	AF	-0.0176268	-0.20827	0.17134	0.000310705	0	0.0492	0.85108	0.9315
727	4	139553761	141087047	2888	322	LTL	AF	0.288423	-0.12697	0.78889	0.0831875	0	0.62357	0.170384	0.397532
785	5	9203856	10549029	3245	339	LTL	AF	-0.110559	-0.51185	0.26211	0.0122232	0	0.26729	0.547559	0.752339
844	5	82720249	84094797	2402	290	LTL	AF	0.0361156	-0.40866	0.50238	0.00130433	0	0.29122	0.861923	0.938295
864	5	106389389	107265911	2027	244	LTL	AF	0.310963	-0.06233	0.73738	0.0966977	0	0.54372	0.104454	0.333624
891	5	136949854	139408116	2975	264	LTL	AF	-0.0839236	-0.32741	0.14561	0.00704316	0	0.1072	0.471728	0.704477
892	5	139408117	141253830	2973	261	LTL	AF	-0.135737	-0.50577	0.2165	0.0184245	0	0.25758	0.426649	0.660372
893	5	141253831	142532956	2898	306	LTL	AF	0.20794	-0.19307	0.66223	0.0432392	0	0.43862	0.290713	0.544994
896	5	145319097	147180171	3604	287	LTL	AF	0.40846	0.02364	0.87715	0.16684	0.00297	0.76939	0.0378187	0.209354
918	5	170898341	172285682	3218	353	LTL	AF	0.281781	-0.14863	0.80365	0.0794008	0	0.64585	0.186981	0.418639
919	5	172285683	173606995	3236	320	LTL	AF	0.171376	-0.07117	0.42887	0.0293698	0	0.18393	0.15563	0.38731
934	6	9020711	10416550	3266	280	LTL	AF	0.0900646	-0.29743	0.49663	0.00811162	0	0.25788	0.632945	0.815475
951	6	26396201	27261035	1349	86	LTL	AF	0.174193	-0.21428	0.59308	0.0303432	0	0.35381	0.366563	0.617704
961	6	31427210	32208901	2102	157	LTL	AF	0.132456	-0.12539	0.39396	0.0175447	0	0.1552	0.310593	0.561359
972	6	36346354	37570051	2909	291	LTL	AF	-0.0954002	-0.44712	0.22963	0.0091012	0	0.20081	0.562447	0.7587
976	6	40778402	42103738	2930	314	LTL	AF	0.298874	-0.04648	0.68676	0.0893254	0	0.47164	0.0861157	0.30996
1038	6	107309328	109043244	3023	284	LTL	AF	0.438503	0.03323	0.97584	0.192285	0.00362	0.95227	0.0402897	0.213889
1045	6	116132148	117674076	3175	210	LTL	AF	-0.207229	-0.65991	0.21109	0.042944	0	0.43819	0.309065	0.560874
1053	6	123854858	125365054	3196	323	LTL	AF	-0.169724	-0.59333	0.21755	0.0288063	0	0.35471	0.373676	0.621415
1057	6	129850179	130550137	1861	236	LTL	AF	-0.171336	-0.56513	0.19262	0.0293559	0	0.3196	0.346567	0.596435
1061	6	134313644	135544083	2557	292	LTL	AF	0.103976	-0.24053	0.47272	0.010811	0	0.22413	0.547839	0.752339
1074	6	151629955	152376499	1862	210	LTL	AF	0.0925551	-0.37899	0.59466	0.00856645	0	0.3686	0.676012	0.835064
1078	6	154462011	155523957	2730	315	LTL	AF	-0.432195	-0.71972	-0.1722	0.186793	0.02965	0.518	0.00141827	0.0270635
1125	7	25671576	27351286	3458	275	LTL	AF	0.227867	-0.08908	0.56829	0.0519235	0	0.32295	0.156086	0.38731
1166	7	73128831	75243899	1629	242	LTL	AF	0.281504	-0.00648	0.59145	0.0792447	0	0.34982	0.0574651	0.2484
1171	7	80055722	81533566	3052	294	LTL	AF	0.225032	-0.09749	0.57698	0.0506393	0	0.33291	0.171385	0.397532
1191	7	105312564	106399739	2604	309	LTL	AF	0.0369819	-0.34403	0.4403	0.00136766	0	0.21914	0.842973	0.925871
1208	7	128779174	130418704	3202	278	LTL	AF	-0.271756	-0.70683	0.11201	0.0738513	0	0.4996	0.149613	0.380732
1215	7	138755108	140217630	2929	311	LTL	AF	-0.050806	-0.42951	0.31832	0.00258125	0	0.20596	0.779433	0.894148
1223	7	149843000	150897818	2460	236	LTL	AF	-0.0113878	-0.41668	0.39768	0.000129681	0	0.22623	0.953075	0.981787
1267	8	21650454	22895018	2627	317	LTL	AF	0.4991	0.24835	0.81796	0.2491	0.06168	0.66905	0.000242383	0.00922447
1268	8	22895019	23788494	2670	268	LTL	AF	0.0292644	-0.37484	0.43671	0.000856404	0	0.22749	0.877341	0.940887
1275	8	29744541	31134786	2618	234	LTL	AF	-0.227487	-0.74694	0.23418	0.0517503	0	0.56014	0.304948	0.559887
1360	8	135313674	136220342	2289	245	LTL	AF	-0.370282	-0.84689	0.03895	0.137109	0	0.71723	0.0683119	0.274897
1413	9	36749274	37687112	2009	244	LTL	AF	0.250479	-0.11049	0.6452	0.0627397	0	0.41628	0.159427	0.391757
1453	9	109150718	110630150	3402	332	LTL	AF	0.288415	-0.07614	0.71361	0.0831832	0	0.50924	0.123161	0.340615
1461	9	116159541	117054909	2158	278	LTL	AF	0.253693	-0.06434	0.59593	0.0643599	0	0.35513	0.11469	0.338464
1500	10	12581572	13208061	1798	262	LTL	AF	-0.108064	-0.49923	0.25484	0.0116779	0	0.2524	0.537999	0.749511
1521	10	32457294	33655458	3127	183	LTL	AF	0.302648	-0.09327	0.7507	0.0915956	0	0.56354	0.133343	0.3591
1555	10	73514215	75694023	2790	194	LTL	AF	0.101756	-0.26504	0.48246	0.0103544	0	0.23736	0.572171	0.764239
1559	10	79952997	81190573	3025	347	LTL	AF	0.175103	-0.13072	0.50203	0.0306612	0	0.25203	0.256748	0.501614
1580	10	102509299	104206837	2471	259	LTL	AF	0.203264	-0.03489	0.45561	0.0413163	0	0.20758	0.103313	0.333624
1581	10	104206838	106142283	3469	249	LTL	AF	0.273649	0.19455	0.34882	0.0748838	0.03785	0.12168	3.97694e-11	8.5968e-09
1582	10	106142284	107877787	3473	230	LTL	AF	0.115097	-0.23176	0.48443	0.0132473	0	0.23764	0.493663	0.71774
1589	10	114255955	115588903	2610	310	LTL	AF	-0.1198	-0.41184	0.15799	0.014352	0	0.16962	0.391765	0.631881
1631	11	19780785	20686336	2450	312	LTL	AF	-0.303902	-0.60743	-0.03024	0.0923566	0.00214	0.36897	0.0301101	0.184008
1656	11	43949378	45019559	2753	332	LTL	AF	-0.172454	-0.56641	0.20219	0.0297402	0	0.32245	0.343468	0.596435
1675	11	66782662	68000949	1866	198	LTL	AF	0.558007	0.23075	0.96368	0.311372	0.05324	0.92868	0.00168454	0.029773
1677	11	68887345	69713996	1962	246	LTL	AF	-0.283792	-0.67324	0.06547	0.0805377	0	0.45325	0.111292	0.338464
1727	11	122589225	123398882	2133	286	LTL	AF	-0.0784644	-0.46244	0.28923	0.00615666	0	0.22191	0.663069	0.830994
1733	11	128262551	129451784	2492	305	LTL	AF	0.199808	-0.05003	0.45841	0.0399231	0	0.21014	0.11204	0.338464
1740	12	60317	1078397	2066	278	LTL	AF	0.235452	-0.05021	0.54127	0.0554376	0	0.29297	0.10589	0.336706
1743	12	3069507	3871114	2355	310	LTL	AF	-0.0718946	-0.48181	0.31943	0.00516883	0	0.24427	0.704412	0.846
1744	12	3871115	4967643	2421	316	LTL	AF	0.261295	0.00388	0.5482	0.0682753	0.00109	0.30052	0.0523799	0.237449
1747	12	6948955	8123317	2369	250	LTL	AF	0.118512	-0.28635	0.54821	0.014045	0	0.30749	0.549615	0.753488
1756	12	16136743	17374895	1949	260	LTL	AF	-0.143127	-0.52872	0.22017	0.0204853	0	0.28031	0.423574	0.660372
1764	12	23923799	25058714	2799	296	LTL	AF	-0.132477	-0.32704	0.05855	0.0175502	0	0.10696	0.172703	0.397532
1766	12	25990814	26958056	2648	239	LTL	AF	0.199959	-0.04946	0.46071	0.0399835	0	0.21225	0.118832	0.340615
1794	12	56987106	58748139	2524	221	LTL	AF	-0.10133	-0.3893	0.18297	0.0102678	0	0.15248	0.476238	0.705831
1823	12	92061180	93487547	3176	271	LTL	AF	0.7617	0.41956	1	0.580188	0.17603	1	6.13864e-05	0.00306055
1841	12	111592382	113947983	3007	247	LTL	AF	-0.31944	-0.66016	-0.00962	0.102042	0.00142	0.43581	0.0405863	0.213889
1844	12	115439452	116197675	2007	267	LTL	AF	-0.273534	-0.65536	0.06038	0.0748208	0	0.4295	0.104233	0.333624
1849	12	120567741	121817509	2949	219	LTL	AF	0.0383627	-0.29976	0.37303	0.0014717	0	0.15626	0.816676	0.914363
1850	12	121817510	123396634	2563	209	LTL	AF	0.0870888	-0.26465	0.45782	0.00758446	0	0.21311	0.616443	0.8064
1851	12	123396635	124843768	2890	229	LTL	AF	0.0919901	-0.27537	0.48539	0.00846219	0	0.24188	0.611157	0.803099
1862	12	132957946	133841814	1949	188	LTL	AF	0.0727403	-0.22786	0.39083	0.00529115	0	0.15793	0.636672	0.815763
1948	13	109813577	110995432	3421	337	LTL	AF	-0.243815	-0.58407	0.05983	0.059446	0	0.34114	0.11677	0.338464
1952	13	113573119	114302561	1736	239	LTL	AF	-0.364535	-0.7918	0.01366	0.132886	0	0.62694	0.05506	0.243771
1955	14	20876081	21982654	2738	366	LTL	AF	0.129781	-0.16232	0.43764	0.0168431	0	0.19196	0.372863	0.621347
1957	14	22760701	23985936	2782	335	LTL	AF	0.412631	0.17426	0.68268	0.170265	0.03037	0.46605	0.00107637	0.02187
1965	14	32382246	33591113	2773	324	LTL	AF	0.425862	0.17996	0.72031	0.181358	0.03239	0.51885	0.000950966	0.020527
1995	14	64033238	65229391	2281	176	LTL	AF	-0.236217	-0.55449	0.06954	0.0557987	0	0.30746	0.120743	0.340615
1996	14	65229392	66300066	2537	202	LTL	AF	-0.132498	-0.41511	0.13854	0.0175556	0	0.17232	0.328848	0.585692
2002	14	72665320	73373373	1809	231	LTL	AF	-0.0185465	-0.25535	0.21627	0.000343974	0	0.07484	0.87358	0.940299
2003	14	73373374	74245428	1753	144	LTL	AF	-0.0506794	-0.28462	0.18033	0.0025684	0	0.08469	0.66644	0.831538
2004	14	74245429	75699501	2759	218	LTL	AF	0.0688126	-0.26193	0.41345	0.00473517	0	0.17551	0.675371	0.835064
2006	14	76694202	77425453	1859	264	LTL	AF	-0.455862	-0.93423	-0.07957	0.20781	0.00763	0.87279	0.019919	0.153514
2018	14	90662837	92101228	3129	293	LTL	AF	0.350802	0.04786	0.70805	0.123062	0.00353	0.50133	0.0231896	0.163045
2045	15	34410073	35118927	1545	197	LTL	AF	0.214127	-0.1915	0.65389	0.0458502	0	0.42976	0.283246	0.536211
2049	15	39238841	40604780	2849	279	LTL	AF	0.622661	0.25111	1	0.387706	0.0634	1	0.00160583	0.029773
2055	15	47693317	49260006	2384	232	LTL	AF	-0.382356	-0.79254	-0.03854	0.146196	0.0031	0.62813	0.0340405	0.196714
2068	15	63218979	64339945	2594	223	LTL	AF	-0.24227	-0.70691	0.17004	0.0586949	0	0.50167	0.237384	0.471092
2070	15	66355635	67396520	2887	285	LTL	AF	0.0134492	-0.41566	0.44283	0.000180881	0	0.24463	0.946311	0.980813
2075	15	73375719	74458113	2009	211	LTL	AF	0.308842	0.10742	0.51795	0.0953833	0.01154	0.26827	0.00317595	0.045792
2076	15	74458114	76401952	2769	248	LTL	AF	0.0699491	-0.40404	0.55281	0.00489288	0	0.34088	0.746888	0.876913
2081	15	79998207	81077025	2667	275	LTL	AF	-0.0954342	-0.39265	0.19936	0.00910769	0	0.15662	0.515019	0.737526
2104	16	1996493	3379996	2060	315	LTL	AF	-0.0165931	-0.24948	0.22347	0.000275332	0	0.07408	0.887989	0.949545
2105	16	3379997	4816145	2996	324	LTL	AF	-0.374489	-0.63276	-0.13868	0.140242	0.01923	0.40038	0.00267701	0.0431473
2118	16	13893408	15921108	2473	272	LTL	AF	0.195134	-0.08345	0.48883	0.0380774	0	0.23896	0.174697	0.399296
2127	16	27443062	29043177	1907	262	LTL	AF	0.273939	-0.09091	0.69398	0.0750426	0	0.48161	0.137013	0.364996
2149	16	71062713	72089511	1649	148	LTL	AF	-0.401912	-0.90613	0.0165	0.161534	0	0.82107	0.0548574	0.243771
2150	16	72089512	73140781	1629	223	LTL	AF	0.0897339	-0.08017	0.26377	0.00805217	0	0.06959	0.299805	0.555429
2151	16	73140782	74135275	2228	324	LTL	AF	0.240805	-0.10112	0.62129	0.0579872	0	0.386	0.169272	0.397532
2162	16	81437862	82310204	2790	329	LTL	AF	0.1355	-0.07777	0.35903	0.0183603	0	0.12896	0.204388	0.436277
2174	17	815654	1480056	1938	306	LTL	AF	0.0540613	-0.23553	0.34235	0.00292262	0	0.1228	0.70218	0.845532
2175	17	1480057	2699135	2510	306	LTL	AF	-0.150133	-0.41088	0.09381	0.0225399	0	0.16882	0.218985	0.454846
2180	17	6305079	7264458	2197	305	LTL	AF	-0.0798279	-0.52649	0.34366	0.00637249	0	0.29438	0.690911	0.84009
2181	17	7264459	8554763	2604	280	LTL	AF	-0.14995	-0.37921	0.06457	0.0224849	0	0.1438	0.164875	0.397472
2188	17	14508611	15308722	2579	277	LTL	AF	0.0920025	-0.27338	0.45716	0.00846446	0	0.21319	0.598534	0.792147
2205	17	40233546	42348003	2890	255	LTL	AF	-0.04578	-0.2833	0.19216	0.00209581	0	0.08522	0.697981	0.845428
2216	17	54950108	56245227	2697	357	LTL	AF	0.136612	-0.14673	0.42463	0.0186629	0	0.18115	0.334905	0.589891
2222	17	64438388	65582327	2683	314	LTL	AF	0.29633	-0.03295	0.65579	0.0878115	0	0.43006	0.0773754	0.293305
2225	17	68176220	69245590	2667	235	LTL	AF	0.0114693	-0.44877	0.48344	0.000131545	0	0.30303	0.957434	0.984343
2232	17	75619257	76596287	2874	347	LTL	AF	-0.154626	-0.42422	0.10225	0.0239093	0	0.17996	0.22521	0.461392
2241	18	2839843	3722828	2384	327	LTL	AF	0.296108	-0.07992	0.7451	0.0876797	0	0.55517	0.12401	0.341772
2246	18	7862480	8788524	2631	294	LTL	AF	-0.335488	-0.77394	0.04804	0.112552	0	0.59899	0.0840581	0.309641
2262	18	28792735	30401128	3330	280	LTL	AF	-0.314958	-0.67172	0.00563	0.0991985	0	0.4512	0.0553178	0.243771
2283	18	54957868	55809315	2417	251	LTL	AF	0.127204	-0.2686	0.56128	0.0161809	0	0.31827	0.519331	0.737526
2295	18	67195981	68051035	2053	235	LTL	AF	-0.327095	-0.72716	0.04063	0.106991	0	0.52876	0.0729284	0.282869
2308	19	1515921	2253174	1541	271	LTL	AF	-0.212011	-0.59281	0.12436	0.0449486	0	0.35142	0.214263	0.4517
2311	19	3893910	4741718	1876	285	LTL	AF	-0.360682	-0.78833	0.00444	0.130091	0	0.62146	0.0515296	0.237449
2316	19	8199017	9105577	2051	258	LTL	AF	0.311952	-0.03726	0.71885	0.0973142	0	0.51675	0.0833205	0.309189
2318	19	10028841	11681978	3427	322	LTL	AF	-0.31108	-0.66777	0.00769	0.0967705	0	0.44591	0.0557855	0.244314
2327	19	18504868	19749166	2019	224	LTL	AF	0.072637	-0.38939	0.56686	0.00527613	0	0.34069	0.740886	0.873033
2337	19	30375793	31763008	2413	306	LTL	AF	-0.180671	-0.65093	0.25315	0.032642	0	0.42518	0.390351	0.6318
2365	19	55714086	56411086	1789	308	LTL	AF	0.315699	-0.05948	0.74191	0.0996659	0	0.55043	0.0967099	0.326686
2373	20	3736552	4591847	2397	273	LTL	AF	-0.23342	-0.6273	0.11089	0.0544849	0	0.39351	0.185461	0.4177
2376	20	6128359	7231796	2479	272	LTL	AF	0.159875	-0.25611	0.62843	0.0255601	0	0.39834	0.432478	0.664891
2385	20	15238520	15962576	1892	257	LTL	AF	-0.492724	-0.97902	-0.12057	0.242777	0.01498	0.95848	0.0118622	0.1071
2401	20	35990262	37253657	2310	269	LTL	AF	-0.164978	-0.54064	0.18802	0.0272177	0	0.29308	0.344964	0.596435
2406	20	42185672	43008890	1792	252	LTL	AF	-0.0719665	-0.48675	0.32735	0.00517918	0	0.24753	0.709155	0.847293
2415	20	51533751	52411532	1878	299	LTL	AF	-0.177918	-0.5421	0.16429	0.0316547	0	0.29442	0.295171	0.550893
2449	21	34383795	35729261	2634	298	LTL	AF	0.396048	0.02419	0.82851	0.156854	0.00265	0.68642	0.0338901	0.196714
2453	21	39252060	40480831	2817	311	LTL	AF	0.335832	-0.00426	0.73378	0.112783	0	0.53843	0.0616028	0.257528
2459	21	44815009	46045433	1931	260	LTL	AF	0.285367	-0.04199	0.64362	0.0814342	0	0.41424	0.0861326	0.30996
2463	22	17587475	18535225	2702	322	LTL	AF	-0.361247	-0.76	-0.02151	0.130499	0.00201	0.5776	0.0428632	0.213889
2472	22	27192924	27952441	2561	351	LTL	AF	0.0376822	-0.3749	0.47887	0.00141995	0	0.25844	0.849906	0.9315
2482	22	37364005	38718589	2924	319	LTL	AF	-0.0552061	-0.5537	0.41595	0.00304771	0	0.33831	0.801302	0.907427
4	1	2983520	3582047	1645	275	LTL	CAD	-0.430171	-0.78197	-0.11748	0.185047	0.01398	0.61148	0.00736481	0.0757029
31	1	31639218	33066846	2105	218	LTL	CAD	-0.145368	-0.43744	0.13963	0.0211317	0	0.19196	0.311027	0.561359
36	1	38474037	40200950	3312	308	LTL	CAD	-0.719406	-1	-0.42032	0.517545	0.17667	1	7.60663e-06	0.00054792
38	1	41093876	41977966	2127	227	LTL	CAD	-0.047702	-0.38033	0.26636	0.00227548	0	0.15287	0.763263	0.883636
41	1	45167236	47257261	3160	209	LTL	CAD	0.205342	-0.08555	0.52611	0.0421654	0	0.27679	0.172799	0.397532
52	1	59889046	61377615	2702	264	LTL	CAD	-0.259637	-0.7303	0.15032	0.0674114	0	0.53422	0.203493	0.435576
97	1	110224231	111134062	1800	277	LTL	CAD	-0.352513	-0.60212	-0.1184	0.124265	0.01402	0.36255	0.00385621	0.0543757
100	1	113418038	114664387	1930	223	LTL	CAD	-0.1016	-0.31488	0.11332	0.0103225	0	0.09929	0.345851	0.596435
101	1	114664388	116207297	3523	274	LTL	CAD	-0.159296	-0.46552	0.13407	0.0253753	0	0.21671	0.273456	0.520306
110	1	151146408	152535630	1996	212	LTL	CAD	-0.259016	-0.58749	0.04738	0.0670893	0	0.34514	0.0945983	0.322636
125	1	167163955	168179086	2029	257	LTL	CAD	0.0661824	-0.37962	0.55138	0.00438011	0	0.33359	0.75405	0.880675
155	1	201067953	202583884	3299	343	LTL	CAD	-0.700564	-1	-0.34913	0.49079	0.12189	1	0.000290434	0.01044
191	1	240248509	241033584	1876	274	LTL	CAD	-0.144435	-0.48665	0.18707	0.0208613	0	0.2376	0.38549	0.626834
195	1	243048004	244723196	2674	302	LTL	CAD	-0.0262194	-0.40098	0.36482	0.000687456	0	0.19998	0.885605	0.948972
209	2	5568654	6306606	2078	237	LTL	CAD	-0.0445634	-0.47803	0.38321	0.0019859	0	0.25221	0.825698	0.918922
212	2	7966710	8978798	1958	278	LTL	CAD	0.189762	-0.17659	0.61107	0.0360095	0	0.37385	0.300756	0.555692
213	2	8978799	9960670	1876	233	LTL	CAD	-0.67047	-1	-0.3074	0.44953	0.09449	1	0.000892553	0.0199539
248	2	43295777	44104110	1937	217	LTL	CAD	-0.0589326	-0.36191	0.2343	0.00347305	0	0.13732	0.685056	0.835932
263	2	55663337	56394698	1878	174	LTL	CAD	-0.541099	-1	-0.12567	0.292788	0.01668	1	0.0147545	0.122954
267	2	59251997	60775066	3176	306	LTL	CAD	-0.181012	-0.50194	0.12155	0.0327653	0	0.25194	0.237276	0.471092
271	2	64696090	65938002	2714	294	LTL	CAD	0.316639	0.03344	0.63136	0.10026	0.00221	0.39862	0.0349467	0.198379
290	2	84395900	85992794	3171	263	LTL	CAD	0.169581	-0.09986	0.4599	0.0287576	0	0.21151	0.210284	0.444706
327	2	135160198	137061003	2662	164	LTL	CAD	0.045966	-0.35208	0.44542	0.00211287	0	0.21882	0.810157	0.910794
349	2	164702313	165917788	2011	202	LTL	CAD	-0.0951016	-0.445	0.24059	0.00904432	0	0.20094	0.57364	0.765333
381	2	202504863	203639686	1815	210	LTL	CAD	-0.00246037	-0.22229	0.22391	6.05342e-06	0	0.06551	0.982385	0.993735
393	2	215899571	217566011	3539	333	LTL	CAD	0.254451	0.00791	0.51598	0.0647451	0.00091	0.26624	0.0438956	0.213889
395	2	218396259	219678783	2193	232	LTL	CAD	0.513764	0.20235	0.91424	0.263954	0.04106	0.83584	0.00187174	0.0318884
404	2	227557842	228812485	3493	279	LTL	CAD	-0.412071	-0.89399	-0.02401	0.169803	0.00361	0.79922	0.0378475	0.209354
407	2	230541093	231847386	3107	286	LTL	CAD	0.338493	-0.07895	0.88285	0.114577	0	0.77943	0.11686	0.338464
441	3	20754843	21790867	3050	268	LTL	CAD	0.670136	0.32082	1	0.449082	0.10293	1	0.000479837	0.013554
463	3	45844192	47588461	3162	205	LTL	CAD	-0.432245	-0.81742	-0.09788	0.186835	0.01033	0.66817	0.0130972	0.113184
464	3	47588462	50387742	2608	171	LTL	CAD	-0.641642	-0.90195	-0.4111	0.411705	0.169	0.81352	2.03135e-06	0.00018792
465	3	50387743	51953968	1770	121	LTL	CAD	-0.471279	-0.87233	-0.11436	0.222104	0.01354	0.76096	0.0133463	0.1134
482	3	69784970	71223281	2339	265	LTL	CAD	-0.439996	-0.89784	-0.05957	0.193597	0.00566	0.80611	0.0262953	0.175976
483	3	71223282	72334704	2570	335	LTL	CAD	-0.156144	-0.54603	0.20911	0.0243811	0	0.29955	0.385629	0.626887
484	3	72334705	73606612	2578	313	LTL	CAD	0.146159	-0.17751	0.49217	0.0213623	0	0.24223	0.366874	0.617704
542	3	138693847	139831267	2307	223	LTL	CAD	-0.578963	-1	-0.15803	0.335199	0.02556	1	0.00892375	0.0875782
551	3	148638309	149998411	3262	297	LTL	CAD	-0.126561	-0.56946	0.29764	0.0160178	0	0.335	0.5387	0.749511
552	3	149998412	151131307	2230	252	LTL	CAD	-0.23328	-0.66327	0.15298	0.0544196	0	0.44052	0.223902	0.461392
558	3	156795411	157633700	1872	152	LTL	CAD	-0.116335	-0.55858	0.30737	0.0135338	0	0.31711	0.568402	0.762037
584	3	186602046	187939199	3290	345	LTL	CAD	-0.400739	-0.87695	-0.00767	0.160591	0.00205	0.76905	0.0432014	0.213889
594	3	196383153	197147990	1791	233	LTL	CAD	0.0450553	-0.29939	0.42166	0.00202998	0	0.18934	0.791389	0.900822
609	4	9916157	10370666	1652	88	LTL	CAD	-0.22467	-0.66728	0.19357	0.0504765	0	0.44526	0.27125	0.51955
610	4	10370667	11050119	1780	180	LTL	CAD	-0.0340212	-0.51344	0.42942	0.00115744	0	0.31545	0.874708	0.940299
638	4	37880861	38984838	3083	295	LTL	CAD	0.177287	-0.15255	0.53358	0.0314308	0	0.28471	0.286229	0.540315
651	4	54659779	55681701	1933	243	LTL	CAD	-0.332353	-0.71852	0.01268	0.110459	0	0.51627	0.0590881	0.251953
653	4	57103101	58011085	2530	239	LTL	CAD	-0.324102	-0.81021	0.08783	0.105042	0	0.65643	0.119928	0.340615
670	4	76497359	78045637	3680	256	LTL	CAD	-0.234531	-0.58324	0.0922	0.055005	0	0.34017	0.145799	0.378432
727	4	139553761	141087047	2888	322	LTL	CAD	-0.203631	-0.65424	0.20961	0.0414655	0	0.43245	0.314672	0.565429
731	4	146174872	147161042	1909	238	LTL	CAD	0.191356	-0.21352	0.65249	0.0366171	0	0.42718	0.334662	0.589891
758	4	175959698	177129678	2491	249	LTL	CAD	-0.109492	-0.60809	0.36031	0.0119884	0	0.38624	0.619856	0.808064
766	4	182946259	183603892	1877	274	LTL	CAD	0.111275	-0.22781	0.47316	0.0123821	0	0.22743	0.518698	0.737526
777	5	1206610	2106885	2953	320	LTL	CAD	-0.417704	-0.59368	-0.2622	0.174476	0.06875	0.35246	4.79429e-07	5.1732e-05
785	5	9203856	10549029	3245	339	LTL	CAD	0.23708	-0.1648	0.71354	0.0562068	0	0.50973	0.235589	0.471092
833	5	67096192	68006993	2045	254	LTL	CAD	-0.0794509	-0.5489	0.37545	0.00631244	0	0.31961	0.71033	0.847293
887	5	130573818	132554690	2727	198	LTL	CAD	-0.0428772	-0.35143	0.27761	0.00183845	0	0.13875	0.780804	0.894148
892	5	139408117	141253830	2974	261	LTL	CAD	0.354648	-0.05344	0.85437	0.125776	0	0.72994	0.0919343	0.318456
893	5	141253831	142532956	2908	306	LTL	CAD	-0.165746	-0.56413	0.22107	0.0274716	0	0.32063	0.379515	0.621818
919	5	172285683	173606995	3236	320	LTL	CAD	0.394796	0.05464	0.78647	0.155864	0.00452	0.61853	0.0226757	0.163045
926	6	63979	1380679	3270	344	LTL	CAD	0.0541086	-0.22676	0.34364	0.00292774	0	0.12305	0.70155	0.845532
935	6	10416551	11790671	3295	319	LTL	CAD	0.168231	-0.19832	0.56161	0.0283018	0	0.31654	0.347367	0.596435
952	6	27261036	28666364	2711	116	LTL	CAD	-0.444105	-0.7736	-0.15122	0.197229	0.02298	0.59846	0.00530814	0.06642
953	6	28666365	29529755	2129	77	LTL	CAD	-0.0465061	-0.35238	0.26883	0.00216282	0	0.13337	0.756547	0.880675
954	6	29529756	29833843	2339	53	LTL	CAD	0.0182537	-0.31244	0.34218	0.000333196	0	0.14146	0.909031	0.965626
957	6	30715007	31106493	2083	102	LTL	CAD	-0.0593401	-0.361	0.24414	0.00352124	0	0.13606	0.688803	0.839233
958	6	31106494	31250556	1555	37	LTL	CAD	0.0101221	-0.27953	0.30708	0.000102457	0	0.11505	0.945208	0.980813
959	6	31250557	31320268	1074	24	LTL	CAD	-0.217836	-0.53472	0.10688	0.0474525	0	0.28593	0.175938	0.400168
960	6	31320269	31427209	1403	39	LTL	CAD	-0.05501	-0.35416	0.23971	0.0030261	0	0.13291	0.705263	0.846
961	6	31427210	32208901	2102	157	LTL	CAD	-0.0510264	-0.25648	0.14819	0.00260369	0	0.06708	0.615488	0.8064
962	6	32208902	32454577	1830	45	LTL	CAD	0.350506	0.04574	0.66162	0.122854	0.00319	0.43774	0.0267427	0.175976
964	6	32539568	32586784	304	36	LTL	CAD	0.385279	0.05168	0.75477	0.14844	0.00459	0.56967	0.0282638	0.176331
965	6	32586785	32629239	361	85	LTL	CAD	0.18824	-0.02869	0.41323	0.0354342	0	0.17076	0.0908843	0.316684
966	6	32629240	32682213	612	26	LTL	CAD	0.270114	-0.05164	0.59435	0.0729614	0	0.35325	0.0996209	0.330978
967	6	32682214	32897998	1577	62	LTL	CAD	0.0944702	-0.168	0.36359	0.00892463	0	0.13384	0.478188	0.707043
972	6	36346354	37570051	2909	291	LTL	CAD	-0.191789	-0.56824	0.16355	0.036783	0	0.32333	0.26894	0.518786
976	6	40778402	42103738	2933	315	LTL	CAD	0.0461908	-0.4217	0.53227	0.00213359	0	0.32088	0.831162	0.918922
1006	6	73170169	74401506	2724	228	LTL	CAD	-0.12397	-0.59468	0.30432	0.0153686	0	0.3568	0.561749	0.7587
1038	6	107309328	109043244	3023	284	LTL	CAD	-0.352288	-0.85719	0.05604	0.124107	0	0.73477	0.0944226	0.322636
1039	6	109043245	110647842	3152	210	LTL	CAD	-0.0554137	-0.41796	0.30107	0.00307068	0	0.18736	0.745491	0.876152
1054	6	125365055	127545459	2981	271	LTL	CAD	-0.250291	-0.624	0.08746	0.0626457	0	0.38937	0.149138	0.380126
1057	6	129850179	130550137	1862	237	LTL	CAD	-1	-1	-0.65376	1	0.4274	1	8.09893e-08	1.04976e-05
1061	6	134313644	135544083	2559	292	LTL	CAD	-0.0272507	-0.34168	0.28435	0.000742598	0	0.13361	0.85573	0.933818
1073	6	150635316	151629954	3160	304	LTL	CAD	0.0995368	-0.24006	0.4442	0.00990757	0	0.19986	0.543049	0.752339
1100	7	4938443	6020653	3015	313	LTL	CAD	-0.405462	-0.92227	0.01135	0.1644	0	0.85057	0.0538893	0.24255
1191	7	105312564	106399739	2604	309	LTL	CAD	-0.0187474	-0.37755	0.349	0.000351467	0	0.18095	0.916569	0.968312
1208	7	128779174	130418704	3204	278	LTL	CAD	-0.621136	-1	-0.31402	0.38581	0.09861	1	0.000206999	0.0083835
1215	7	138755108	140217630	2935	311	LTL	CAD	-0.287032	-0.63041	0.01151	0.0823876	0	0.39742	0.0653981	0.266536
1223	7	149843000	150897818	2460	236	LTL	CAD	0.215281	-0.07617	0.52322	0.0463457	0	0.27376	0.135438	0.362988
1267	8	21650454	22895018	2628	317	LTL	CAD	-0.216581	-0.51683	0.04928	0.0469075	0	0.26712	0.113699	0.338464
1292	8	55275355	56346878	2197	204	LTL	CAD	0.117249	-0.22515	0.46653	0.0137474	0	0.21993	0.484251	0.709575
1293	8	56346879	57436722	2467	203	LTL	CAD	-0.282484	-0.57749	-0.00098	0.0797974	0.00113	0.33349	0.0486349	0.23328
1309	8	73838028	75011699	2495	255	LTL	CAD	-0.431149	-0.69615	-0.19675	0.185889	0.03871	0.48463	0.000449524	0.013554
1325	8	94999067	96175630	2889	215	LTL	CAD	-0.00267068	-0.31776	0.32251	7.13252e-06	0	0.13379	0.986432	0.995143
1376	9	4025356	4596614	1759	279	LTL	CAD	-0.148292	-0.5509	0.23052	0.0219905	0	0.30413	0.427456	0.660372
1430	9	85135752	86769886	3420	301	LTL	CAD	-0.1042	-0.55168	0.32917	0.0108575	0	0.31602	0.606008	0.798146
1445	9	100310518	101596750	2920	281	LTL	CAD	-0.483339	-0.88492	-0.14206	0.233616	0.02053	0.78308	0.00638359	0.07128
1453	9	109150718	110630150	3409	333	LTL	CAD	0.186394	-0.09761	0.48323	0.0347428	0	0.23351	0.187952	0.418639
1473	9	129617772	130902727	1923	201	LTL	CAD	-0.176135	-0.61855	0.21848	0.0310234	0	0.38342	0.372287	0.621278
1474	9	130902728	132193798	1795	228	LTL	CAD	-0.297595	-0.7364	0.09341	0.0885629	0	0.54228	0.124684	0.341772
1486	10	1329233	1872960	1684	247	LTL	CAD	0.315999	-0.069	0.78194	0.0998556	0	0.61142	0.108646	0.338464
1521	10	32457294	33655458	3127	183	LTL	CAD	0.0710236	-0.33051	0.47735	0.00504436	0	0.24318	0.709179	0.847293
1529	10	43769843	44893846	3314	215	LTL	CAD	-0.133114	-0.46809	0.18102	0.0177192	0	0.22242	0.392678	0.631921
1559	10	79952997	81190573	3029	347	LTL	CAD	-0.0431309	-0.37509	0.29761	0.00186028	0	0.15749	0.796397	0.903342
1568	10	88443653	89971628	2362	251	LTL	CAD	-0.0640548	-0.50094	0.36196	0.00410302	0	0.26937	0.752583	0.880675
1574	10	95528161	97040172	2816	193	LTL	CAD	0.0372849	-0.26798	0.35154	0.00139016	0	0.13852	0.810501	0.910794
1580	10	102509299	104206837	2475	259	LTL	CAD	-0.166786	-0.46427	0.10849	0.0278175	0	0.21555	0.234757	0.471092
1581	10	104206838	106142283	3470	249	LTL	CAD	-0.654471	-0.76312	-0.55158	0.428332	0.30424	0.58235	6.99742e-25	4.536e-22
1603	10	129831970	130694008	2395	305	LTL	CAD	0.220624	-0.1464	0.64052	0.0486748	0	0.41027	0.227504	0.463147
1610	11	87150	1061399	2286	271	LTL	CAD	-0.23845	-0.45355	-0.02931	0.0568585	0.00138	0.20571	0.0275909	0.175976
1617	11	5533058	6180840	2371	211	LTL	CAD	0.0363458	-0.43943	0.53979	0.00132102	0	0.33819	0.872145	0.940299
1621	11	9080940	10370100	2771	208	LTL	CAD	0.0491851	-0.28049	0.3904	0.00241917	0	0.16414	0.765434	0.883636
1624	11	11632651	12470449	2377	303	LTL	CAD	-0.340887	-0.79292	0.05339	0.116204	0	0.62914	0.0795219	0.29778
1625	11	12470450	13364727	2163	250	LTL	CAD	-0.166341	-0.59514	0.24448	0.0276695	0	0.35875	0.396452	0.632039
1631	11	19780785	20686336	2451	312	LTL	CAD	0.0873019	-0.27394	0.46732	0.00762162	0	0.22578	0.622859	0.808064
1656	11	43949378	45019559	2753	332	LTL	CAD	-0.329284	-0.70333	0.00366	0.108428	0	0.49468	0.0520369	0.237449
1662	11	50217009	51098366	1554	15	LTL	CAD	-0.828059	-1	-0.39632	0.685681	0.15707	1	0.00398722	0.0550111
1674	11	64594823	66782661	2919	249	LTL	CAD	-0.351233	-0.68963	-0.06012	0.123364	0.00442	0.47559	0.0218021	0.162372
1675	11	66782662	68000949	1866	198	LTL	CAD	-0.344679	-0.66382	-0.05609	0.118804	0.00404	0.44065	0.0224448	0.163045
1677	11	68887345	69713996	1962	246	LTL	CAD	0.0304827	-0.27183	0.34474	0.000929196	0	0.13429	0.841244	0.925243
1718	11	111117781	112755446	2767	245	LTL	CAD	-0.370465	-0.83352	0.01252	0.137244	0	0.69476	0.0613483	0.257528
1727	11	122589225	123398882	2135	286	LTL	CAD	0.222301	-0.1108	0.58977	0.0494178	0	0.34782	0.19132	0.423184
1729	11	124403478	125266684	1921	284	LTL	CAD	-0.275581	-0.65347	0.07173	0.0759447	0	0.42702	0.121169	0.340615
1746	12	6023701	6948954	2078	280	LTL	CAD	-0.0332833	-0.45188	0.37227	0.00110778	0	0.23827	0.863296	0.938295
1747	12	6948955	8123317	2369	250	LTL	CAD	-0.155199	-0.54996	0.22686	0.0240868	0	0.30666	0.398118	0.633671
1764	12	23923799	25058714	2799	296	LTL	CAD	-0.0102186	-0.26451	0.24424	0.00010442	0	0.08517	0.936113	0.980813
1781	12	42117737	43072679	2047	169	LTL	CAD	-0.0899419	-0.55997	0.36885	0.00808954	0	0.33983	0.679858	0.835064
1792	12	54371449	55416802	2047	247	LTL	CAD	-0.221402	-0.42771	-0.01598	0.0490187	0.00084	0.18294	0.0331651	0.195578
1794	12	56987106	58748139	2525	221	LTL	CAD	-0.028097	-0.37377	0.29895	0.000789441	0	0.15979	0.86469	0.938894
1821	12	88344765	90567001	3099	248	LTL	CAD	-0.205126	-0.50127	0.07799	0.0420768	0	0.25127	0.148318	0.380126
1840	12	110111515	111592381	1926	185	LTL	CAD	-0.244212	-0.60228	0.08185	0.0596393	0	0.36274	0.146583	0.379506
1841	12	111592382	113947983	3008	247	LTL	CAD	-0.691645	-0.92354	-0.48907	0.478373	0.23919	0.85292	3.56142e-09	5.7672e-07
1844	12	115439452	116197675	2007	267	LTL	CAD	0.0435229	-0.40292	0.4902	0.00189424	0	0.26655	0.834023	0.920668
1849	12	120567741	121817509	2949	219	LTL	CAD	-0.312767	-0.58794	-0.04905	0.0978234	0.00343	0.34568	0.021683	0.162372
1850	12	121817510	123396634	2563	209	LTL	CAD	0.0358508	-0.26177	0.3382	0.00128528	0	0.1212	0.809281	0.910794
1851	12	123396635	124843768	2891	229	LTL	CAD	0.0108926	-0.28564	0.3126	0.000118648	0	0.12011	0.941219	0.980813
1852	12	124843769	126079935	3308	357	LTL	CAD	0.135357	-0.0857	0.36114	0.0183216	0	0.13042	0.227584	0.463147
1862	12	132957946	133841814	1886	184	LTL	CAD	0.139812	-0.14696	0.43345	0.0195474	0	0.18788	0.32692	0.583736
1873	13	28587126	30068525	3320	305	LTL	CAD	0.285886	0.01827	0.57495	0.0817309	0.00144	0.33057	0.0383847	0.20952
1884	13	41003944	42037054	1667	203	LTL	CAD	-0.232698	-0.54907	0.05761	0.0541481	0	0.30147	0.115509	0.338464
1913	13	73114510	74437635	3271	275	LTL	CAD	-0.207675	-0.5847	0.14525	0.0431288	0	0.34397	0.227681	0.463147
1948	13	109813577	110995432	3424	337	LTL	CAD	-0.164782	-0.36323	0.0233	0.0271529	0	0.13194	0.0851855	0.30996
1952	13	113573119	114302561	1736	239	LTL	CAD	0.0880285	-0.29861	0.49008	0.00774902	0	0.25195	0.635508	0.815763
1957	14	22760701	23985936	2777	335	LTL	CAD	-0.155487	-0.50323	0.16809	0.0241761	0	0.25365	0.338141	0.591957
1965	14	32382246	33591113	2774	325	LTL	CAD	-0.113545	-0.51284	0.28468	0.0128925	0	0.27143	0.547095	0.752339
2002	14	72665320	73373373	1810	231	LTL	CAD	-0.0149387	-0.32421	0.29536	0.000223163	0	0.12696	0.918352	0.968312
2004	14	74245429	75699501	2760	219	LTL	CAD	0.0929863	-0.19246	0.37921	0.00864645	0	0.14477	0.507124	0.729898
2044	15	33484268	34410072	2754	300	LTL	CAD	0.115807	-0.28431	0.55114	0.0134113	0	0.31226	0.552775	0.753962
2055	15	47693317	49260006	2400	232	LTL	CAD	-0.533658	-1	-0.17687	0.284791	0.03128	1	0.00545443	0.066634
2057	15	50195877	51605477	3147	192	LTL	CAD	-0.340295	-0.5986	-0.10259	0.115801	0.0106	0.35833	0.00567952	0.06816
2070	15	66355635	67396520	2887	285	LTL	CAD	0.0205678	-0.32939	0.38317	0.000423035	0	0.17224	0.903441	0.960828
2075	15	73375719	74458113	2009	211	LTL	CAD	-0.118182	-0.43231	0.19033	0.0139671	0	0.18732	0.433228	0.664891
2118	16	13893408	15921108	2473	272	LTL	CAD	0.402255	0.12093	0.71561	0.161809	0.01462	0.5121	0.00596021	0.0702196
2124	16	24014706	25235251	2636	312	LTL	CAD	-0.0469611	-0.40189	0.3054	0.00220534	0	0.17877	0.785578	0.898286
2127	16	27443062	29043177	1907	262	LTL	CAD	-0.357874	-0.90926	0.08283	0.128073	0	0.82676	0.104859	0.335172
2138	16	57119890	58508978	3526	328	LTL	CAD	-0.148538	-0.59754	0.2674	0.0220636	0	0.35991	0.460424	0.693209
2150	16	72089512	73140781	1630	223	LTL	CAD	-0.34053	-0.62802	-0.07105	0.115961	0.00538	0.3944	0.0149958	0.123038
2153	16	74889128	75525959	1628	187	LTL	CAD	0.232284	-0.13442	0.64013	0.0539558	0	0.41089	0.20976	0.444706
2162	16	81437862	82310204	2792	329	LTL	CAD	-0.108706	-0.2742	0.05534	0.011817	0	0.07518	0.191801	0.423184
2175	17	1480057	2699135	2512	306	LTL	CAD	-0.175384	-0.33783	-0.01066	0.0307597	0.00059	0.11413	0.03487	0.198379
2180	17	6305079	7264458	2201	305	LTL	CAD	0.135134	-0.23918	0.54238	0.0182611	0	0.29689	0.470378	0.703372
2181	17	7264459	8554763	2618	280	LTL	CAD	-0.0149136	-0.19323	0.16355	0.000222414	0	0.04411	0.869747	0.940299
2197	17	29783142	31318753	2874	283	LTL	CAD	-0.04372	-0.38795	0.30143	0.00191143	0	0.17412	0.79477	0.903342
2204	17	38880482	40233545	3212	224	LTL	CAD	-0.242087	-0.62455	0.09739	0.0586059	0	0.39006	0.158582	0.391757
2205	17	40233546	42348003	2890	255	LTL	CAD	-0.283361	-0.46042	-0.10977	0.0802933	0.01205	0.21199	0.00170233	0.029773
2206	17	42348004	43460500	1952	209	LTL	CAD	-0.0761797	-0.46622	0.3024	0.00580334	0	0.23143	0.68326	0.835064
2218	17	58652810	60453120	2133	258	LTL	CAD	-0.212668	-0.53572	0.09301	0.0452278	0	0.287	0.164907	0.397472
2222	17	64438388	65582327	2682	313	LTL	CAD	-0.092298	-0.51585	0.32811	0.00851891	0	0.28027	0.635063	0.815763
2223	17	65582328	66757556	2467	266	LTL	CAD	0.313341	0.03264	0.61693	0.0981824	0.00233	0.3806	0.0280741	0.176331
2225	17	68176220	69245590	2667	235	LTL	CAD	0.297671	-0.12202	0.82147	0.0886079	0	0.67482	0.162635	0.395596
2230	17	73741322	74908266	2549	267	LTL	CAD	-0.322268	-0.67823	-0.00625	0.103857	0.00131	0.45999	0.0430246	0.213889
2241	18	2839843	3722828	2384	327	LTL	CAD	-0.117069	-0.54626	0.29976	0.0137053	0	0.30877	0.555446	0.753962
2268	18	38498382	39410165	1884	196	LTL	CAD	0.00310718	-0.41398	0.44263	9.65457e-06	0	0.25052	0.987728	0.995143
2302	18	74471746	75240760	2712	299	LTL	CAD	-0.158712	-0.53769	0.20236	0.0251894	0	0.28911	0.363799	0.615854
2311	19	3893910	4741718	1876	285	LTL	CAD	-0.0855511	-0.52389	0.32752	0.00731899	0	0.28503	0.666241	0.831538
2316	19	8199017	9105577	2045	258	LTL	CAD	-0.419071	-0.75528	-0.12739	0.17562	0.0165	0.57044	0.00696243	0.0739357
2318	19	10028841	11681978	3426	323	LTL	CAD	0.183283	-0.01255	0.39604	0.0335925	0	0.15685	0.0713303	0.280015
2320	19	13213187	13968319	1702	271	LTL	CAD	-0.0748926	-0.46463	0.29723	0.00560891	0	0.22469	0.679518	0.835064
2326	19	17750519	18504867	1904	262	LTL	CAD	0.0825273	-0.15081	0.32099	0.00681076	0	0.10339	0.487601	0.712216
2327	19	18504868	19749166	2019	224	LTL	CAD	-0.122277	-0.45698	0.20012	0.0149516	0	0.2105	0.443075	0.673859
2336	19	29389091	30375792	2750	268	LTL	CAD	-0.500116	-0.95201	-0.15089	0.250116	0.02288	0.90632	0.00680853	0.073548
2347	19	41004106	41733463	1693	221	LTL	CAD	0.251855	-0.11652	0.67097	0.063431	0	0.4502	0.173938	0.398417
2351	19	45040933	45893307	1907	275	LTL	CAD	0.524377	0.38514	0.67	0.274971	0.14833	0.4489	1.50837e-11	4.8924e-09
2352	19	45893308	46765060	1977	230	LTL	CAD	0.176814	-0.1185	0.49675	0.0312632	0	0.24677	0.245569	0.484523
2361	19	53431218	54042240	2119	281	LTL	CAD	-0.0401088	-0.4276	0.3572	0.00160872	0	0.21041	0.831329	0.918922
2365	19	55714086	56411086	1788	308	LTL	CAD	-0.275286	-0.61125	0.02755	0.0757824	0	0.37363	0.0757923	0.290641
2366	19	56411087	57143509	2130	285	LTL	CAD	0.135159	-0.151	0.43049	0.018268	0	0.18559	0.345801	0.596435
2399	20	32484507	33890060	1763	124	LTL	CAD	0.0613999	-0.30844	0.44134	0.00376994	0	0.20562	0.736267	0.871898
2401	20	35990262	37253657	2312	269	LTL	CAD	0.115205	-0.2173	0.46592	0.0132721	0	0.21858	0.483815	0.709575
2403	20	38427595	40272390	3393	300	LTL	CAD	0.139359	-0.1629	0.46507	0.0194209	0	0.2164	0.360006	0.610681
2408	20	44072211	45673603	3568	314	LTL	CAD	-0.229479	-0.58275	0.10167	0.0526607	0	0.3396	0.162514	0.395596
2415	20	51533751	52411532	1878	299	LTL	CAD	-4.02377e-05	NA	NA	1.61907e-09	NA	NA	0.999803	1
2427	20	60766558	61470768	1885	268	LTL	CAD	-0.32744	-0.63653	-0.04837	0.107217	0.00348	0.40516	0.0272295	0.175976
2428	20	61470769	62179241	1889	241	LTL	CAD	-0.455541	-0.77327	-0.21429	0.207518	0.04592	0.59795	0.000438985	0.013554
2429	20	62179242	62963627	1423	171	LTL	CAD	-0.522264	-0.80857	-0.31408	0.272759	0.09865	0.65379	7.52418e-06	0.00054792
2449	21	34383795	35729261	2634	298	LTL	CAD	-0.168545	-0.44661	0.09333	0.0284075	0	0.19973	0.198395	0.43055
2453	21	39252060	40480831	2860	311	LTL	CAD	0.0581838	-0.2744	0.39086	0.00338536	0	0.16679	0.718838	0.856456
2456	21	42187153	43081434	2425	318	LTL	CAD	-0.460749	-0.81808	-0.15401	0.212289	0.02384	0.66926	0.0043049	0.05805
2459	21	44815009	46045433	1912	260	LTL	CAD	0.0809616	-0.28159	0.45511	0.00655477	0	0.21714	0.648647	0.822316
2465	22	19635655	20969184	2268	284	LTL	CAD	-0.566986	-0.97223	-0.24153	0.321473	0.05834	0.94523	0.000982274	0.020527
2466	22	20969185	22404422	2095	221	LTL	CAD	-0.267856	-0.66091	0.09414	0.071747	0	0.43698	0.144452	0.374747
2469	22	23950733	25282436	2612	242	LTL	CAD	-0.00402353	-0.33756	0.32795	1.61888e-05	0	0.14604	0.979836	0.993735
2480	22	35368342	36135968	2006	235	LTL	CAD	0.209484	-0.11864	0.56434	0.0438835	0	0.31848	0.194072	0.426142
2482	22	37364005	38718589	2925	319	LTL	CAD	-0.026177	-0.48484	0.4296	0.000685233	0	0.2903	0.900719	0.960276
2485	22	41722788	42867927	1827	165	LTL	CAD	0.158168	-0.25733	0.62565	0.0250171	0	0.3952	0.442655	0.673859
14	1	11709174	13481025	2456	265	LTL	VTE	-0.488136	-0.85521	-0.17427	0.238277	0.03037	0.73139	0.00317135	0.045792
155	1	201067953	202583884	3235	334	LTL	VTE	0.334251	0.04334	0.6645	0.111724	0.00286	0.44156	0.0233784	0.163045
156	1	202583885	204092537	3016	314	LTL	VTE	-0.208128	-0.52684	0.0943	0.0433173	0	0.27756	0.172885	0.397532
163	1	212347583	213958292	3465	281	LTL	VTE	0.0993197	-0.18963	0.40916	0.0098644	0	0.16751	0.503326	0.727554
175	1	224943338	226534711	3183	224	LTL	VTE	0.195551	-0.11241	0.52036	0.0382402	0	0.27077	0.204782	0.436974
195	1	243048004	244723196	2613	289	LTL	VTE	-0.237858	-0.58581	0.08705	0.0565765	0	0.34318	0.151338	0.380732
212	2	7966710	8978798	1908	266	LTL	VTE	-0.332471	-0.71116	-0.00333	0.110537	0.0015	0.50575	0.0520664	0.237449
250	2	45189469	45850047	1824	246	LTL	VTE	0.283222	-0.08955	0.70976	0.0802149	0	0.50376	0.129641	0.35395
271	2	64696090	65938002	2672	287	LTL	VTE	0.247306	-0.00764	0.51639	0.0611601	0	0.26666	0.0630385	0.261676
274	2	67979829	68877774	2048	198	LTL	VTE	0.106623	-0.18944	0.41803	0.0113685	0	0.17653	0.481298	0.708382
290	2	84395900	85992794	3127	255	LTL	VTE	-0.0264104	-0.36101	0.30419	0.000697507	0	0.14925	0.870651	0.940299
359	2	174118390	174927563	1819	262	LTL	VTE	0.00646977	-0.3608	0.38308	4.18579e-05	0	0.18306	0.971161	0.992442
461	3	42301658	44141693	3297	288	LTL	VTE	-0.426312	-0.80696	-0.10646	0.181742	0.01212	0.65119	0.0108809	0.100903
484	3	72334705	73606612	2509	299	LTL	VTE	-0.192359	-0.44586	0.05696	0.0370021	0	0.19879	0.125469	0.341772
532	3	125992651	127495173	3549	282	LTL	VTE	0.326418	0.02323	0.68193	0.106549	0.002	0.46503	0.0387682	0.20952
543	3	139831268	141034637	2427	254	LTL	VTE	-0.356081	-0.77549	0.003	0.126794	0	0.60139	0.0583807	0.250617
638	4	37880861	38984838	3034	288	LTL	VTE	0.3056	-0.02269	0.69517	0.0933917	0	0.48325	0.0744989	0.287357
821	5	53747857	55221398	3637	227	LTL	VTE	0.229939	-0.12657	0.62198	0.0528721	0	0.38722	0.198238	0.43055
844	5	82720249	84094797	2371	282	LTL	VTE	-0.396933	-0.85721	-0.02073	0.157556	0.00284	0.7348	0.0434076	0.213889
887	5	130573818	132554690	2682	189	LTL	VTE	0.450282	0.08136	0.90087	0.202754	0.0083	0.81157	0.0194541	0.153022
915	5	166863414	168342743	2911	335	LTL	VTE	0.278207	-0.06777	0.67364	0.0773989	0	0.4538	0.113865	0.338464
922	5	176180302	177659902	2286	237	LTL	VTE	-0.132103	-0.50349	0.22222	0.0174511	0	0.25386	0.445991	0.676766
949	6	24950380	25684629	2258	192	LTL	VTE	0.360007	0.13967	0.59292	0.129605	0.01951	0.35155	0.0021632	0.0358892
950	6	25684630	26396200	1762	115	LTL	VTE	0.454407	0.17019	0.75648	0.206486	0.02897	0.57227	0.00272562	0.0431473
951	6	26396201	27261035	1338	83	LTL	VTE	0.521672	0.1776	0.91744	0.272142	0.03167	0.84169	0.00509276	0.06642
953	6	28666365	29529755	2116	76	LTL	VTE	0.207752	-0.10563	0.54341	0.043161	0	0.29529	0.187867	0.418639
954	6	29529756	29833843	2329	52	LTL	VTE	-0.105263	-0.34571	0.13951	0.0110802	0	0.12003	0.396355	0.632039
955	6	29833844	30070717	1610	39	LTL	VTE	-0.110575	-0.40018	0.17969	0.0122269	0	0.1609	0.447353	0.676766
956	6	30070718	30715006	2194	85	LTL	VTE	-0.0407717	-0.32187	0.24263	0.00166234	0	0.11303	0.772014	0.890135
957	6	30715007	31106493	2078	101	LTL	VTE	-0.0081797	-0.2563	0.23512	6.69076e-05	0	0.07854	0.946476	0.980813
958	6	31106494	31250556	1550	37	LTL	VTE	-0.155118	-0.39857	0.09325	0.0240615	0	0.15886	0.218189	0.454846
959	6	31250557	31320268	1070	24	LTL	VTE	-0.00242861	-0.23066	0.2293	5.89813e-06	0	0.06986	0.983202	0.993735
960	6	31320269	31427209	1389	37	LTL	VTE	-0.0148151	-0.23849	0.20858	0.000219489	0	0.06783	0.897227	0.957588
961	6	31427210	32208901	2088	154	LTL	VTE	-0.185655	-0.38855	0.017	0.0344676	0	0.15097	0.070755	0.280015
962	6	32208902	32454577	1822	45	LTL	VTE	0.21693	-0.11407	0.57287	0.0470587	0	0.32818	0.199506	0.433445
964	6	32539568	32586784	301	34	LTL	VTE	0.419448	0.1105	0.75628	0.175937	0.01276	0.57195	0.010607	0.100903
965	6	32586785	32629239	347	80	LTL	VTE	-0.0584438	-0.26971	0.14814	0.00341568	0	0.07343	0.579132	0.770415
972	6	36346354	37570051	2882	287	LTL	VTE	0.0629079	-0.25987	0.39926	0.0039574	0	0.16897	0.699597	0.845532
1039	6	109043245	110647842	3117	202	LTL	VTE	-0.36827	-0.7528	-0.02231	0.135623	0.00222	0.5667	0.038511	0.20952
1215	7	138755108	140217630	2872	301	LTL	VTE	-0.216254	-0.59905	0.13318	0.0467656	0	0.35885	0.221549	0.459604
1223	7	149843000	150897818	2428	227	LTL	VTE	0.339347	-0.02922	0.77492	0.115157	0	0.6005	0.0702849	0.280015
1267	8	21650454	22895018	2545	303	LTL	VTE	0.20718	-0.06605	0.50036	0.0429235	0	0.25036	0.138205	0.364996
1268	8	22895019	23788494	2637	261	LTL	VTE	0.207681	-0.08952	0.53758	0.0431315	0	0.28899	0.17321	0.397532
1273	8	27406512	28344176	2307	238	LTL	VTE	-0.30044	-0.66774	0.03581	0.0902644	0	0.44588	0.0782529	0.294991
1293	8	56346879	57436722	2440	198	LTL	VTE	-0.184784	-0.45629	0.08059	0.034145	0	0.2082	0.169946	0.397532
1328	8	98132520	99388944	2733	261	LTL	VTE	-0.0724449	-0.44152	0.28915	0.00524826	0	0.20448	0.682592	0.835064
1331	8	102548681	103716053	2719	253	LTL	VTE	-0.114229	-0.52419	0.27413	0.0130483	0	0.28044	0.552943	0.753962
1453	9	109150718	110630150	3351	326	LTL	VTE	0.267798	-0.04622	0.61735	0.0717159	0	0.38112	0.0944065	0.322636
1461	9	116159541	117054909	2125	270	LTL	VTE	0.462127	0.20709	0.76273	0.213562	0.04289	0.58175	0.000702628	0.0175209
1478	9	135135888	136042490	1987	261	LTL	VTE	-0.203027	-0.37393	-0.03358	0.0412201	0.00135	0.13983	0.0176662	0.1416
1521	10	32457294	33655458	3103	180	LTL	VTE	0.235962	-0.17188	0.68073	0.0556782	0	0.4634	0.232582	0.470355
1559	10	79952997	81190573	2982	341	LTL	VTE	-0.380318	-0.6726	-0.1101	0.144642	0.01212	0.45239	0.00630006	0.07128
1574	10	95528161	97040172	2792	188	LTL	VTE	-0.335779	-0.65374	-0.04701	0.112748	0.00333	0.42737	0.0272404	0.175976
1580	10	102509299	104206837	2451	254	LTL	VTE	-0.488136	-0.80213	-0.22329	0.238276	0.04986	0.64341	0.000667432	0.0172886
1603	10	129831970	130694008	2364	298	LTL	VTE	-0.147883	-0.48721	0.16626	0.0218692	0	0.23738	0.356219	0.610286
1624	11	11632651	12470449	2338	294	LTL	VTE	0.259488	-0.08525	0.63171	0.0673341	0	0.39906	0.135893	0.364165
1658	11	46316006	48066366	1926	145	LTL	VTE	0.0480262	-0.1731	0.2723	0.00230651	0	0.07671	0.660903	0.830093
1659	11	48066367	48765366	1457	32	LTL	VTE	0.165081	-0.15988	0.49424	0.0272516	0	0.24479	0.307787	0.560874
1660	11	48765367	49386071	1274	31	LTL	VTE	-0.122564	-0.53204	0.2834	0.015022	0	0.28714	0.536588	0.749511
1667	11	56623495	57675986	1853	177	LTL	VTE	0.0718002	-0.19403	0.35645	0.00515527	0	0.12918	0.594502	0.788466
1716	11	107846825	109891837	3049	255	LTL	VTE	-0.0406546	-0.24388	0.157	0.0016528	0	0.06144	0.679225	0.835064
1727	11	122589225	123398882	2085	273	LTL	VTE	-0.232796	-0.56772	0.08078	0.0541941	0	0.32231	0.143463	0.373645
1733	11	128262551	129451784	2465	298	LTL	VTE	-0.25347	-0.56761	0.03804	0.0642473	0	0.32219	0.0859899	0.30996
1734	11	129451785	130500783	2343	277	LTL	VTE	-0.103623	-0.46058	0.23551	0.0107378	0	0.21355	0.543958	0.752339
1740	12	60317	1078397	1998	260	LTL	VTE	0.245499	-0.05138	0.57187	0.0602699	0	0.32703	0.103209	0.333624
1743	12	3069507	3871114	2301	297	LTL	VTE	-0.299229	-0.62101	-0.0076	0.0895382	0.00132	0.38565	0.0506805	0.237449
1752	12	11742150	12721874	2217	281	LTL	VTE	-0.128949	-0.358	0.09208	0.0166278	0	0.12817	0.260324	0.505946
1764	12	23923799	25058714	2763	290	LTL	VTE	-0.314337	-0.63523	-0.01359	0.0988079	0.00136	0.40352	0.0403988	0.213889
1792	12	54371449	55416802	2019	240	LTL	VTE	0.194104	-0.06184	0.45367	0.0376763	0	0.20582	0.122194	0.340615
1841	12	111592382	113947983	2967	239	LTL	VTE	-0.67108	-0.99413	-0.39824	0.450348	0.1586	0.98829	8.91488e-06	0.000577368
1851	12	123396635	124843768	2863	224	LTL	VTE	0.142192	-0.12114	0.43274	0.0202187	0	0.18784	0.30546	0.559887
1856	12	128372589	129170296	2226	297	LTL	VTE	-0.0498842	-0.37991	0.28166	0.00248844	0	0.15589	0.756045	0.880675
1862	12	132957946	133841814	1915	183	LTL	VTE	0.368163	0.05408	0.7284	0.135544	0.00421	0.53057	0.0228033	0.163045
1873	13	28587126	30068525	3249	293	LTL	VTE	0.0956308	-0.27774	0.48313	0.00914525	0	0.24176	0.594127	0.788466
1951	13	112319065	113573118	2562	299	LTL	VTE	0.405314	0.04518	0.8384	0.16428	0.00411	0.70292	0.0276991	0.175976
1958	14	23985937	24906056	1755	239	LTL	VTE	0.083578	-0.20814	0.38814	0.00698528	0	0.15221	0.568356	0.762037
2004	14	74245429	75699501	2707	209	LTL	VTE	0.485862	0.15915	0.87499	0.236062	0.02537	0.7656	0.0053001	0.06642
2019	14	92101229	93386328	3335	304	LTL	VTE	0.239286	-0.07283	0.57576	0.0572579	0	0.3315	0.12336	0.340615
2104	16	1996493	3379996	1963	295	LTL	VTE	0.222273	-0.10687	0.58938	0.0494051	0	0.34737	0.186418	0.4185
2105	16	3379997	4816145	2929	315	LTL	VTE	-0.00963899	-0.28079	0.25628	9.29101e-05	0	0.09734	0.941676	0.980813
2118	16	13893408	15921108	2431	263	LTL	VTE	0.00135976	-0.32688	0.34195	1.84893e-06	0	0.14909	0.993265	0.997619
2126	16	26154123	27443061	3407	337	LTL	VTE	-0.470819	-0.87619	-0.12843	0.22167	0.01681	0.76771	0.00725891	0.0757029
2162	16	81437862	82310204	2750	324	LTL	VTE	0.106624	-0.02984	0.24154	0.0113686	0	0.05834	0.117889	0.33984
2172	16	89106305	90292787	2720	247	LTL	VTE	0.0427	-0.26372	0.3553	0.00182329	0	0.13685	0.778901	0.894148
2175	17	1480057	2699135	2473	300	LTL	VTE	-0.244064	-0.43437	-0.0554	0.0595671	0.00329	0.18868	0.0113816	0.104045
2180	17	6305079	7264458	2141	291	LTL	VTE	-0.118165	-0.43296	0.18461	0.0139629	0	0.18776	0.426652	0.660372
2181	17	7264459	8554763	2556	269	LTL	VTE	0.100995	-0.13201	0.34605	0.0102	0	0.1199	0.377867	0.621818
2184	17	10572618	11778164	2537	298	LTL	VTE	0.130923	-0.18555	0.47087	0.0171408	0	0.22257	0.412133	0.649573
2199	17	32356062	33614189	2608	267	LTL	VTE	-0.0125322	-0.39741	0.38296	0.000157057	0	0.20526	0.945806	0.980813
2223	17	65582328	66757556	2415	255	LTL	VTE	0.128302	-0.2208	0.49501	0.0164615	0	0.25018	0.46389	0.697615
2232	17	75619257	76596287	2798	338	LTL	VTE	0.0554794	-0.1893	0.29973	0.00307796	0	0.09269	0.645688	0.822316
2243	18	4603962	5575812	2466	262	LTL	VTE	-0.268584	-0.63317	0.05963	0.0721375	0	0.4009	0.110471	0.338464
2272	18	42974166	44300145	2984	301	LTL	VTE	-0.181528	-0.5951	0.20254	0.0329523	0	0.35582	0.333655	0.589891
2301	18	73568261	74471745	2707	299	LTL	VTE	0.164582	-0.12974	0.4819	0.0270872	0	0.23223	0.270323	0.519169
2302	18	74471746	75240760	2673	292	LTL	VTE	0.149487	-0.21007	0.52201	0.0223462	0	0.27327	0.391979	0.631881
2306	19	64705	762046	1394	267	LTL	VTE	-0.595288	-1	-0.25024	0.354368	0.06262	1	0.00128058	0.0251345
2308	19	1515921	2253174	1493	261	LTL	VTE	-0.164762	-0.50151	0.1614	0.0271465	0	0.25175	0.308759	0.560874
2318	19	10028841	11681978	3372	315	LTL	VTE	-0.135637	-0.34321	0.07257	0.0183973	0	0.11779	0.192009	0.423184
2321	19	13968320	14891100	1764	252	LTL	VTE	-0.0190898	-0.38248	0.34001	0.00036442	0	0.17634	0.912547	0.968288
2326	19	17750519	18504867	1849	248	LTL	VTE	0.262824	-0.06386	0.61197	0.0690764	0	0.37451	0.111435	0.338464
2351	19	45040933	45893307	1876	268	LTL	VTE	-0.339289	-0.58392	-0.10047	0.115117	0.01015	0.34096	0.00532547	0.06642
2352	19	45893308	46765060	1954	225	LTL	VTE	0.0789528	-0.30838	0.48969	0.00623354	0	0.24813	0.676011	0.835064
2361	19	53431218	54042240	2073	271	LTL	VTE	0.133981	-0.26274	0.55272	0.017951	0	0.31065	0.487145	0.712216
2398	20	30569660	32484506	2792	266	LTL	VTE	0.15566	-0.12369	0.44151	0.0242302	0	0.19493	0.268877	0.518786
2399	20	32484507	33890060	1730	113	LTL	VTE	0.208291	-0.05958	0.49111	0.0433853	0	0.24119	0.123223	0.340615
2400	20	33890061	35990261	2683	221	LTL	VTE	-0.0125579	-0.17111	0.1398	0.0001577	0	0.03262	0.873917	0.940299
2426	20	60125334	60766557	1814	270	LTL	VTE	0.223542	-0.1242	0.60391	0.0499711	0	0.36475	0.200939	0.43416
2463	22	17587475	18535225	2635	309	LTL	VTE	0.112433	-0.22555	0.46946	0.0126411	0	0.22327	0.498109	0.721933
2473	22	27952442	29457601	2509	239	LTL	VTE	0.0531799	-0.26877	0.38216	0.0028281	0	0.15414	0.740226	0.873033
2488	22	44409534	45170649	2465	342	LTL	VTE	0.048729	-0.27804	0.39223	0.00237452	0	0.16646	0.764931	0.883636
2490	22	46351049	47299625	2427	275	LTL	VTE	0.116716	-0.25474	0.50233	0.0136227	0	0.25717	0.517243	0.737526
2495	22	50347997	51244236	2187	252	LTL	VTE	0.183083	-0.0659	0.45254	0.0335194	0	0.20479	0.149478	0.380126
19	1	17557747	18427820	2131	266	LTL	HF	0.310153	0.0158	0.63825	0.0961947	0.00145	0.40736	0.0426204	0.213889
52	1	59889046	61377615	2580	260	LTL	HF	-0.0839493	-0.47195	0.2813	0.00704748	0	0.22881	0.64154	0.818929
97	1	110224231	111134062	1695	272	LTL	HF	0.277233	-0.02563	0.61632	0.0768583	0	0.37986	0.0765265	0.2916
101	1	114664388	116207297	3448	269	LTL	HF	-0.0204403	-0.45915	0.42491	0.000417805	0	0.26422	0.919204	0.968312
210	2	6306607	7108208	1913	240	LTL	HF	-0.294704	-0.79419	0.14333	0.0868504	0	0.6315	0.170708	0.397532
226	2	22429641	23538527	2193	250	LTL	HF	0.256515	-0.05949	0.60225	0.0658	0	0.3627	0.111767	0.338464
305	2	110097869	112644828	2359	255	LTL	HF	-0.139047	-0.51868	0.22382	0.0193339	0	0.27047	0.431846	0.664891
444	3	23426045	24270189	1798	206	LTL	HF	-0.254647	-0.7324	0.15489	0.0648452	0	0.53839	0.225208	0.461392
451	3	31269698	32378805	2522	290	LTL	HF	-0.0634741	-0.50352	0.36894	0.00402896	0	0.28253	0.754846	0.880675
461	3	42301658	44141693	3156	289	LTL	HF	-0.331724	-0.82596	0.07983	0.110041	0	0.68297	0.113172	0.338464
571	3	170174579	171134849	1816	228	LTL	HF	-0.381323	-0.74602	-0.09611	0.145407	0.0094	0.55655	0.0124616	0.110959
584	3	186602046	187939199	3192	340	LTL	HF	-0.206715	-0.6587	0.19208	0.0427312	0	0.43389	0.297477	0.553034
603	4	5972710	7135819	3144	368	LTL	HF	-0.0743497	-0.42636	0.27519	0.00552787	0	0.19122	0.656377	0.825414
698	4	109978983	111733579	3339	293	LTL	HF	0.0981247	-0.21202	0.41587	0.00962846	0	0.17705	0.525528	0.742383
766	4	182946259	183603892	1814	269	LTL	HF	0.0423862	-0.40286	0.49628	0.00179659	0	0.28047	0.836513	0.922408
789	5	13608148	14910295	2834	284	LTL	HF	-0.000738167	-0.35371	0.36853	5.4489e-07	0	0.175	0.996654	0.998541
891	5	136949854	139408116	2796	258	LTL	HF	-0.273556	-0.5942	0.03775	0.0748328	0	0.35307	0.07283	0.282869
892	5	139408117	141253830	2803	253	LTL	HF	0.275479	-0.15057	0.78302	0.0758887	0	0.61313	0.197039	0.43055
893	5	141253831	142532956	2737	303	LTL	HF	-0.186198	-0.62492	0.21216	0.0346698	0	0.39204	0.340801	0.595601
919	5	172285683	173606995	3160	317	LTL	HF	0.171993	-0.22572	0.61237	0.0295817	0	0.37754	0.380165	0.621818
935	6	10416551	11790671	3166	314	LTL	HF	0.0653287	-0.35236	0.50797	0.00426784	0	0.27657	0.740886	0.873033
972	6	36346354	37570051	2781	285	LTL	HF	0.110418	-0.28001	0.54014	0.0121922	0	0.29791	0.566078	0.762037
1006	6	73170169	74401506	2654	222	LTL	HF	0.47105	0.05921	1	0.221888	0.00559	1	0.0311247	0.185483
1089	6	165835954	166853325	2918	291	LTL	HF	0.239257	-0.06939	0.57211	0.0572437	0	0.32731	0.132167	0.357891
1125	7	25671576	27351286	3362	272	LTL	HF	0.00625991	-0.40552	0.43095	3.91865e-05	0	0.24218	0.974676	0.993735
1166	7	73128831	75243899	1550	239	LTL	HF	-0.0791384	-0.50024	0.32295	0.00626289	0	0.26229	0.682657	0.835064
1215	7	138755108	140217630	2801	306	LTL	HF	-0.286642	-0.77722	0.12573	0.0821635	0	0.60407	0.166255	0.397532
1328	8	98132520	99388944	2689	264	LTL	HF	-0.353226	-0.81564	0.02929	0.124768	0	0.66527	0.0713472	0.280015
1344	8	116094204	118300068	3193	300	LTL	HF	0.241519	-0.16362	0.71667	0.0583314	0	0.51485	0.235309	0.471092
1474	9	130902728	132193798	1702	224	LTL	HF	-0.207917	-0.6405	0.17688	0.0432296	0	0.4106	0.288341	0.542512
1478	9	135135888	136042490	1927	260	LTL	HF	0.0756165	-0.25567	0.41472	0.00571786	0	0.17424	0.639054	0.81671
1479	9	136042491	136770926	2086	261	LTL	HF	-0.287405	-0.75606	0.11122	0.0826015	0	0.57163	0.156307	0.38731
1481	9	137593528	138202112	2038	308	LTL	HF	0.172607	-0.20606	0.58294	0.029793	0	0.34029	0.360341	0.610681
1493	10	6234719	6897037	1734	273	LTL	HF	-0.00272473	-0.40461	0.40349	7.42418e-06	0	0.22865	0.988802	0.995143
1499	10	11856925	12581571	1869	245	LTL	HF	0.27474	-0.1677	0.78058	0.075482	0	0.60931	0.202771	0.435576
1500	10	12581572	13208061	1723	258	LTL	HF	-0.257277	-0.72578	0.15608	0.0661915	0	0.52958	0.216938	0.454846
1568	10	88443653	89971628	2267	246	LTL	HF	-0.356514	-0.74172	-0.01772	0.127102	0.00241	0.55016	0.0427227	0.213889
1576	10	98005995	99367800	2523	268	LTL	HF	0.156616	-0.23774	0.59316	0.0245287	0	0.3547	0.417624	0.654261
1580	10	102509299	104206837	2324	251	LTL	HF	-0.136048	-0.42736	0.1498	0.018509	0	0.18349	0.33236	0.589414
1624	11	11632651	12470449	2336	299	LTL	HF	-0.0480664	-0.42021	0.32788	0.00231038	0	0.20073	0.788844	0.900127
1631	11	19780785	20686336	2370	308	LTL	HF	-0.0352622	-0.36176	0.28901	0.00124342	0	0.14722	0.826494	0.918922
1720	11	113889020	114742317	1788	237	LTL	HF	-0.106795	-0.5949	0.36438	0.0114052	0	0.37009	0.625209	0.808064
1743	12	3069507	3871114	2275	306	LTL	HF	-0.335711	-0.71878	-0.00235	0.112702	0.00125	0.51664	0.0517607	0.237449
1744	12	3871115	4967643	2354	312	LTL	HF	-0.245418	-0.61738	0.08173	0.0602298	0	0.38116	0.13817	0.364996
1764	12	23923799	25058714	2714	292	LTL	HF	-0.0766071	-0.43708	0.272	0.00586864	0	0.19951	0.649888	0.822316
1766	12	25990814	26958056	2573	233	LTL	HF	0.329188	0.01504	0.69201	0.108365	0.00172	0.47888	0.041837	0.213889
1840	12	110111515	111592381	1864	179	LTL	HF	0.00127869	-0.4258	0.42997	1.63504e-06	0	0.25358	0.994978	0.99808
1847	12	118256125	119301061	2365	242	LTL	HF	0.174462	-0.25315	0.6651	0.0304369	0	0.4443	0.413488	0.649573
1913	13	73114510	74437635	3077	269	LTL	HF	0.210318	-0.12418	0.57827	0.0442337	0	0.3344	0.216226	0.454442
1948	13	109813577	110995432	3331	335	LTL	HF	0.439358	0.1233	0.81553	0.193035	0.01543	0.66509	0.00788876	0.0786572
2004	14	74245429	75699501	2610	212	LTL	HF	-0.323503	-0.70503	0.01482	0.104654	0	0.49706	0.0604113	0.255812
2049	15	39238841	40604780	2778	276	LTL	HF	0.383775	0.01318	0.83681	0.147283	0.00224	0.70025	0.0422541	0.213889
2081	15	79998207	81077025	2575	268	LTL	HF	-0.265456	-0.59225	0.04542	0.0704667	0	0.35076	0.0872964	0.312544
2094	15	94565522	95662425	2696	337	LTL	HF	-0.354727	-0.75584	-0.01684	0.125831	0.00218	0.5713	0.0436541	0.213889
2102	16	60169	1049079	2216	272	LTL	HF	-0.0748721	-0.37916	0.22872	0.00560583	0	0.14733	0.624092	0.808064
2109	16	7051430	7704354	2606	279	LTL	HF	-0.427338	-0.98078	0.0029	0.182618	0	0.96193	0.0511939	0.237449
2120	16	17343278	19104257	2544	250	LTL	HF	-0.285471	-0.77686	0.13909	0.0814938	0	0.6035	0.17177	0.397532
2159	16	78973581	79662634	2325	340	LTL	HF	-0.271318	-0.65871	0.0713	0.0736136	0	0.4339	0.119962	0.340615
2162	16	81437862	82310204	2676	325	LTL	HF	-0.0687643	-0.28895	0.15178	0.00472853	0	0.08386	0.531084	0.744779
2174	17	815654	1480056	1858	302	LTL	HF	-0.3134	-0.73077	0.04925	0.0982194	0	0.53402	0.0907638	0.316684
2184	17	10572618	11778164	2525	304	LTL	HF	0.147957	-0.18705	0.50182	0.0218913	0	0.2523	0.375546	0.621551
2199	17	32356062	33614189	2571	268	LTL	HF	0.227305	-0.15509	0.66603	0.0516674	0	0.44359	0.238666	0.473615
2204	17	38880482	40233545	3081	218	LTL	HF	0.132786	-0.29966	0.6091	0.0176322	0	0.37859	0.52653	0.742383
2216	17	54950108	56245227	2606	354	LTL	HF	0.148088	-0.18808	0.51838	0.0219302	0	0.26936	0.378592	0.621818
2219	17	60453121	62112373	2015	211	LTL	HF	0.32426	-0.07153	0.80008	0.105145	0	0.64012	0.10694	0.338224
2238	18	10719	848350	2134	282	LTL	HF	0.135785	-0.0207	0.29738	0.0184376	0	0.08844	0.088567	0.313731
2239	18	848351	1940211	2572	257	LTL	HF	-0.215182	-0.71012	0.21692	0.0463034	0	0.5049	0.308005	0.560874
2306	19	64705	762046	1362	273	LTL	HF	0.343408	0.00479	0.73098	0.117929	0.00153	0.53433	0.0482198	0.233087
2316	19	8199017	9105577	1967	253	LTL	HF	-0.2845	-0.65844	0.06452	0.08094	0	0.43355	0.0981831	0.328008
2318	19	10028841	11681978	3213	317	LTL	HF	-0.202838	-0.50945	0.08745	0.0411433	0	0.25954	0.170658	0.397532
2352	19	45893308	46765060	1907	226	LTL	HF	0.0124942	-0.39589	0.44588	0.000156105	0	0.25435	0.949374	0.981787
2361	19	53431218	54042240	2033	276	LTL	HF	0.141355	-0.26073	0.56919	0.0199813	0	0.32722	0.474138	0.704477
2366	19	56411087	57143509	1998	279	LTL	HF	0.177709	-0.13997	0.53149	0.0315803	0	0.28264	0.27414	0.52068
2385	20	15238520	15962576	1831	252	LTL	HF	-0.345124	-0.7004	-0.02819	0.119111	0.00242	0.49057	0.0375346	0.209354
2398	20	30569660	32484506	2706	267	LTL	HF	-0.480062	-0.89903	-0.1383	0.23046	0.01947	0.80826	0.00788864	0.0786572
2401	20	35990262	37253657	2211	263	LTL	HF	-0.274852	-0.64402	0.05809	0.0755435	0	0.41477	0.102555	0.333624
2413	20	49236419	50653620	3523	329	LTL	HF	0.0105612	-0.33646	0.36074	0.000111539	0	0.16619	0.949849	0.981787
2427	20	60766558	61470768	1799	264	LTL	HF	0.0893512	-0.28221	0.47893	0.00798364	0	0.23544	0.620638	0.808064
2433	21	16873444	18222037	1968	256	LTL	HF	-0.576456	-1	-0.16682	0.332301	0.02851	1	0.00630154	0.07128
2449	21	34383795	35729261	2531	292	LTL	HF	0.2781	-0.07162	0.67478	0.0773394	0	0.45533	0.111585	0.338464
2453	21	39252060	40480831	2746	306	LTL	HF	-0.410921	-0.8359	-0.06031	0.168856	0.00529	0.69873	0.0256136	0.175976
2458	21	43812792	44815008	2543	259	LTL	HF	0.0120563	-0.34942	0.37885	0.000145354	0	0.18116	0.944341	0.980813
2460	21	46045434	47014880	2779	291	LTL	HF	-0.282217	-0.72147	0.10192	0.0796466	0	0.52052	0.139724	0.36878
2468	22	23143365	23950732	1797	227	LTL	HF	0.193931	-0.21212	0.64556	0.0376093	0	0.41842	0.337671	0.591957
2485	22	41722788	42867927	1740	159	LTL	HF	0.464225	0.06563	0.98232	0.215505	0.00602	0.96496	0.026321	0.175976
2488	22	44409534	45170649	2440	349	LTL	HF	0.0171176	-0.30608	0.35207	0.000293012	0	0.14743	0.914808	0.968312
2492	22	48269178	48977538	2103	297	LTL	HF	-0.232782	-0.70829	0.19003	0.0541875	0	0.50167	0.263113	0.510251
155	1	201067953	202583884	3236	338	LTL	PAD	0.129557	-0.16403	0.42699	0.0167849	0	0.18232	0.369296	0.619461
156	1	202583885	204092537	3050	321	LTL	PAD	0.391358	0.04539	0.81672	0.153161	0.00389	0.66702	0.0300383	0.184008
274	2	67979829	68877774	1968	203	LTL	PAD	-0.0105199	-0.37699	0.36653	0.000110668	0	0.18385	0.95333	0.981787
393	2	215899571	217566011	3379	329	LTL	PAD	0.320663	-0.01004	0.70017	0.102825	0	0.49024	0.05641	0.245283
603	4	5972710	7135819	3195	367	LTL	PAD	-0.138304	-0.46357	0.16995	0.0191281	0	0.21625	0.375398	0.621483
638	4	37880861	38984838	2995	290	LTL	PAD	-0.269982	-0.70161	0.10934	0.0728902	0	0.49225	0.160373	0.392727
771	4	186881569	187985393	3080	332	LTL	PAD	0.153711	-0.22609	0.56386	0.0236271	0	0.31897	0.408735	0.648
789	5	13608148	14910295	2884	286	LTL	PAD	0.0423676	-0.30703	0.40625	0.00179501	0	0.18108	0.805113	0.90878
891	5	136949854	139408116	2853	259	LTL	PAD	-0.114471	-0.44641	0.21219	0.0131035	0	0.2014	0.473464	0.704477
915	5	166863414	168342743	2919	340	LTL	PAD	-0.190743	-0.58512	0.17686	0.0363829	0	0.34292	0.289743	0.544696
922	5	176180302	177659902	2140	256	LTL	PAD	-0.153078	-0.54367	0.20951	0.023433	0	0.2984	0.396386	0.632039
952	6	27261036	28666364	2559	113	LTL	PAD	-0.520371	-0.83399	-0.23707	0.270786	0.0562	0.69554	0.00078798	0.0187457
1197	7	113339387	115321301	2750	240	LTL	PAD	0.21929	-0.13504	0.61052	0.048088	0	0.37274	0.218783	0.454846
1225	7	152253295	153241228	2924	287	LTL	PAD	-0.0563921	-0.35084	0.23752	0.00318007	0	0.13067	0.696333	0.844584
1727	11	122589225	123398882	2099	280	LTL	PAD	-0.300882	-0.69484	0.04952	0.0905302	0	0.4828	0.0900063	0.316684
1733	11	128262551	129451784	2460	300	LTL	PAD	-0.0919547	-0.46848	0.27914	0.00845567	0	0.22668	0.605389	0.798146
1752	12	11742150	12721874	2207	288	LTL	PAD	-0.330138	-0.60136	-0.07495	0.108991	0.00578	0.36164	0.0129413	0.112962
1839	12	109031820	110111514	2221	208	LTL	PAD	-0.107931	-0.49223	0.25994	0.0116492	0	0.24731	0.554494	0.753962
1841	12	111592382	113947983	2891	244	LTL	PAD	-0.536383	-0.8729	-0.24809	0.287707	0.06155	0.76195	0.000492224	0.013554
1852	12	124843769	126079935	3233	354	LTL	PAD	0.500334	0.23195	0.82387	0.250334	0.0538	0.67877	0.000501853	0.013554
1859	12	130629841	131404042	2493	307	LTL	PAD	0.417785	0.07784	0.80672	0.174544	0.00679	0.6508	0.0147026	0.122954
1873	13	28587126	30068525	3249	300	LTL	PAD	-0.408089	-0.78611	-0.0837	0.166537	0.00803	0.61797	0.0160841	0.13041
1965	14	32382246	33591113	2743	320	LTL	PAD	-0.362481	-0.77413	0.00656	0.131393	0	0.59927	0.0493408	0.2349
2002	14	72665320	73373373	1706	226	LTL	PAD	0.469009	0.207	0.78739	0.219969	0.04285	0.61998	0.000810012	0.0187457
2022	14	95946793	97174314	3348	320	LTL	PAD	-0.222766	-0.5095	0.04622	0.0496247	0	0.25959	0.0973443	0.326686
2159	16	78973581	79662634	2365	339	LTL	PAD	0.365164	0.03718	0.75425	0.133344	0.00323	0.5689	0.0311996	0.185483
2175	17	1480057	2699135	2471	304	LTL	PAD	-0.49459	-0.74375	-0.2842	0.244619	0.08077	0.55316	1.65689e-05	0.000977891
2308	19	1515921	2253174	1495	269	LTL	PAD	0.0645647	-0.22245	0.36247	0.00416861	0	0.13557	0.650807	0.822316
2311	19	3893910	4741718	1866	283	LTL	PAD	0.162895	-0.14655	0.49597	0.0265349	0	0.24599	0.299647	0.555429
2321	19	13968320	14891100	1792	262	LTL	PAD	-0.115746	-0.53079	0.28035	0.0133972	0	0.28918	0.54599	0.752339
2368	19	57959953	59118811	2309	229	LTL	PAD	0.0122005	-0.35356	0.37773	0.000148852	0	0.18553	0.944856	0.980813
2405	20	41351515	42185671	1693	249	LTL	PAD	-0.0405327	-0.39602	0.31884	0.0016429	0	0.17646	0.816652	0.914363
2466	22	20969185	22404422	2025	219	LTL	PAD	-0.00376959	-0.37512	0.37326	1.42098e-05	0	0.18349	0.983191	0.993735
2468	22	23143365	23950732	1820	225	LTL	PAD	0.130554	-0.22919	0.51604	0.0170443	0	0.26779	0.459565	0.693209
2472	22	27192924	27952441	2527	349	LTL	PAD	-0.175771	-0.56026	0.18027	0.0308955	0	0.3157	0.318312	0.569238
4	1	2983520	3582047	1645	275	LTL	Stroke	-0.711917	-1	-0.36723	0.506826	0.13486	1	0.000147733	0.0063936
13	1	10753428	11709173	1997	254	LTL	Stroke	0.302965	-0.03808	0.69302	0.0917876	0	0.48028	0.0835459	0.309189
191	1	240248509	241033584	1876	274	LTL	Stroke	0.305362	-0.07204	0.72669	0.0932462	0	0.52808	0.104435	0.333624
213	2	8978799	9960670	1876	233	LTL	Stroke	-0.0467092	-0.39323	0.30003	0.00218175	0	0.16859	0.78003	0.894148
222	2	17241116	18656325	3628	258	LTL	Stroke	-0.224315	-0.566	0.08887	0.0503171	0	0.32036	0.16218	0.395596
445	3	24270190	25516193	3524	316	LTL	Stroke	0.374502	0.04797	0.76355	0.140252	0.00396	0.58301	0.0270685	0.175976
551	3	148638309	149998411	3262	297	LTL	Stroke	0.351372	0.06128	0.69422	0.123462	0.00444	0.48195	0.0230746	0.163045
698	4	109978983	111733579	3424	297	LTL	Stroke	-0.20051	-0.51945	0.09004	0.0402041	0	0.27027	0.172589	0.397532
777	5	1206610	2106885	2953	320	LTL	Stroke	0.080099	-0.10273	0.27336	0.00641585	0	0.07523	0.38149	0.621884
887	5	130573818	132554690	2728	198	LTL	Stroke	0.292164	-0.03823	0.66104	0.0853599	0	0.43698	0.0883572	0.313731
926	6	63979	1380679	3270	344	LTL	Stroke	0.191163	-0.04626	0.44213	0.0365434	0	0.19548	0.113957	0.338464
948	6	23939307	24950379	2819	255	LTL	Stroke	-0.225367	-0.55854	0.07155	0.0507901	0	0.31197	0.140556	0.369911
951	6	26396201	27261035	1351	86	LTL	Stroke	-0.265949	-0.66992	0.10824	0.0707291	0	0.44879	0.155535	0.38731
964	6	32539568	32586784	304	36	LTL	Stroke	-0.212941	-0.43846	0.01208	0.0453438	0	0.19225	0.0641764	0.263301
965	6	32586785	32629239	361	85	LTL	Stroke	-0.325757	-0.48241	-0.17278	0.106118	0.02985	0.23272	8.0726e-05	0.00373526
967	6	32682214	32897998	1577	62	LTL	Stroke	-0.333125	-0.6264	-0.05442	0.110972	0.00399	0.39238	0.0217737	0.162372
968	6	32897999	33194975	1885	105	LTL	Stroke	-0.0524405	-0.4	0.30331	0.00275001	0	0.17923	0.75884	0.881419
972	6	36346354	37570051	2909	291	LTL	Stroke	0.0992908	-0.22385	0.43196	0.00985867	0	0.18804	0.529709	0.744779
1054	6	125365055	127545459	2981	271	LTL	Stroke	0.1335	-0.21556	0.50343	0.0178223	0	0.25804	0.439763	0.672453
1061	6	134313644	135544083	2559	292	LTL	Stroke	-0.297638	-0.69792	0.06488	0.0885885	0	0.48709	0.101998	0.333624
1089	6	165835954	166853325	2983	294	LTL	Stroke	0.0951053	-0.1712	0.36445	0.00904503	0	0.13388	0.468493	0.702
1094	7	15064	617319	855	153	LTL	Stroke	-0.299556	-0.70644	0.0631	0.0897338	0	0.49905	0.109734	0.338464
1125	7	25671576	27351286	3460	275	LTL	Stroke	0.199019	-0.14715	0.56711	0.0396086	0	0.32161	0.249527	0.490909
1166	7	73128831	75243899	1629	242	LTL	Stroke	-0.145851	-0.47649	0.17895	0.0212724	0	0.22723	0.360108	0.610681
1309	8	73838028	75011699	2495	255	LTL	Stroke	-0.0688193	-0.29243	0.15005	0.00473609	0	0.08611	0.535988	0.749511
1631	11	19780785	20686336	2451	312	LTL	Stroke	-0.0078827	-0.34514	0.33538	6.2137e-05	0	0.15657	0.962101	0.986354
1744	12	3871115	4967643	2421	316	LTL	Stroke	0.236474	-0.0558	0.55204	0.0559202	0	0.30475	0.116992	0.338464
1792	12	54371449	55416802	2047	247	LTL	Stroke	-0.0218353	-0.26177	0.22139	0.000476778	0	0.07881	0.856396	0.933818
1794	12	56987106	58748139	2525	221	LTL	Stroke	0.103379	-0.21931	0.44653	0.0106872	0	0.20019	0.525178	0.742383
1841	12	111592382	113947983	3008	247	LTL	Stroke	-0.529694	-0.85207	-0.25233	0.280575	0.06367	0.72602	0.000411012	0.013554
1856	12	128372589	129170296	2304	311	LTL	Stroke	-0.00461455	-0.35226	0.33526	2.12941e-05	0	0.15484	0.977669	0.993735
1859	12	130629841	131404042	2516	308	LTL	Stroke	0.0966457	-0.2534	0.45611	0.0093404	0	0.20867	0.570048	0.76314
1913	13	73114510	74437635	3271	275	LTL	Stroke	-0.379042	-0.6746	-0.11109	0.143673	0.01246	0.45508	0.00661758	0.0727078
1948	13	109813577	110995432	3424	337	LTL	Stroke	0.0513464	-0.25201	0.35622	0.00263645	0	0.13569	0.731081	0.86756
1958	14	23985937	24906056	1804	254	LTL	Stroke	0.141804	-0.17371	0.46753	0.0201084	0	0.21878	0.369506	0.619535
2094	15	94565522	95662425	2754	340	LTL	Stroke	-0.256686	-0.61334	0.05311	0.0658875	0	0.37619	0.11334	0.338464
2150	16	72089512	73140781	1630	223	LTL	Stroke	0.15172	-0.12352	0.43057	0.0230189	0	0.18539	0.271762	0.519929
2151	16	73140782	74135275	2228	324	LTL	Stroke	0.263352	-0.10798	0.67777	0.0693543	0	0.45938	0.150884	0.380732
2175	17	1480057	2699135	2512	306	LTL	Stroke	0.0821068	-0.16855	0.34149	0.00674152	0	0.1179	0.507159	0.729898
2230	17	73741322	74908266	2549	267	LTL	Stroke	-0.0873764	-0.52555	0.32342	0.00763463	0	0.28622	0.654956	0.825414
2243	18	4603962	5575812	2525	275	LTL	Stroke	0.08172	-0.26102	0.43469	0.00667816	0	0.19468	0.625743	0.808064
2262	18	28792735	30401128	3330	280	LTL	Stroke	-0.132892	-0.46956	0.19317	0.0176603	0	0.22111	0.410628	0.649573
2302	18	74471746	75240760	2712	299	LTL	Stroke	0.114964	-0.18397	0.41416	0.0132167	0	0.17197	0.43478	0.666383
2318	19	10028841	11681978	3429	323	LTL	Stroke	0.0311145	-0.25718	0.32956	0.00096811	0	0.1181	0.829594	0.918922
2367	19	57143510	57959952	2067	280	LTL	Stroke	0.234418	-0.02181	0.49619	0.0549516	0	0.2462	0.0667305	0.270135
2385	20	15238520	15962576	1893	258	LTL	Stroke	0.165567	-0.20058	0.563	0.0274124	0	0.31718	0.358819	0.610681
2428	20	61470769	62179241	1889	241	LTL	Stroke	-0.223637	-0.47874	0.01082	0.0500137	0	0.22948	0.0633572	0.261676
2453	21	39252060	40480831	2860	311	LTL	Stroke	-0.00675218	-0.34977	0.3289	4.55919e-05	0	0.15663	0.967196	0.989915
2473	22	27952442	29457601	2543	244	LTL	Stroke	-0.00813287	-0.32999	0.30651	6.61436e-05	0	0.1353	0.958531	0.984837

## Sheet: Supplementary Table 6
Supplementary Table 6. Causal relationship between leukocyte telomere length and six cardiovascular diseases
A) LCV results between leukocyte telomere length and six cardiovascular diseases
Note: causal associations were quantified by genetic causal proportion. Tests are one-sided and only tests significant after correcting for multiple testing were interpreted. gcp = genetic causal proportion; gcp_se = standard error of gcp; gcp_p = p-value of the gcp; rho = genetic correlation; rho_se = standard error of rho; rho_p = p-value of the rho.
P-values lower than the Bonferroni-corrected threshold (P = 0.05/6 combinations = 8.33E-03) and GCP larger than 0.6 are considered significant and marked in dark blue.
Trait 1	Trait 2	gcp	gcp_se	gcp_p	rho	rho_se
LTL	AF	0.0645054	0.537695	0.908563	-0.00352976	0.0355661
LTL	CAD	0.4363	0.196382	0.0216051	-0.18275	0.0396267
LTL	VTE	0.0293117	0.575639	0.794502	-0.0302961	0.0477244
LTL	HF	0.226058	0.416239	0.611923	-0.14771	0.0489867
LTL	PAD	-0.0916799	0.186016	0.682924	-0.324007	0.0691418
LTL	Stroke	-0.432132	0.387062	0.200546	-0.140659	0.0522695
B) LHC-MR results between leukocyte telomere length and six cardiovascular diseases
Note: bidirectional causal associations were estimated by all genome-wide genetic instrumental variables. Tests are two-sided and only tests significant after correcting for multiple testing were interpreted. Pair = trait pair; EXP = trait used as exposure (X); OUT = trait used as outcome (Y); piX = polygenicity: proportion of non-zero multivariable causal effects among all sequence variants dire…
P-values of axy lower than the Bonferroni-corrected threshold (P = 0.05/6 combinations/2 tests = 4.17E-03) and P-values of ayx larger than 0.05 are considered significant forward causality and marked in dark blue; P-values of ayx lower than the Bonferroni-corrected threshold (P = 0.05/6 combinations/2 tests = 4.17E-03) and P-values of axy larger than 0.05 are considered significant reverse causal…
Pair	EXP	OUT	piX	piY	h2X	h2Y	tX	tX_JKse	tX_JKpval	tY	tY_JKse	tY_JKpval	axy	axy_JKse	axy_JKpval	ayx	ayx_JKse	ayx_JKpval	iXY	iX	iY
LTL-AF	LTL	AF	7.04137e-05	4.5526e-05	0.0231579	0.0218388	0.0397525	0.013563	0.00337929	-0.0325179	0.0173828	0.061388	0.0448873	0.0322487	0.163949	0.0201338	0.0283442	0.477499	-0.0208917	1.08126	1.17885
LTL-CAD	LTL	CAD	7.80725e-05	0.00017368	0.0235263	0.0282525	0.0270494	0.0131546	0.0397572	-0.0485359	0.0113394	1.86651e-05	0.0721425	0.0617953	0.243031	-0.161802	0.0302815	9.12933e-08	-0.0473054	1.06519	1.14493
LTL-VTE	LTL	VTE	7.06731e-05	7.40408e-05	0.0230658	0.0114273	0.0378111	0.0117347	0.00127223	-0.037653	0.0141678	0.00786888	0.0934222	0.23247	0.687781	-0.114902	0.0950691	0.226812	-0.0154698	1.08149	1.16975
LTL-HF	LTL	HF	7.02417e-05	0.000160409	0.0230292	0.00647442	0.042804	0.0123602	0.000534098	-0.0194765	0.0184776	0.291855	-0.00740969	0.0286664	0.796037	0.0226223	0.0416159	0.586719	-0.0376781	1.08158	1.03183
LTL-PAD	LTL	PAD	7.0712e-05	0.166571	0.0231743	0.00323062	0.0413414	0.0140213	0.00319355	-0.0110135	0.0361749	0.760784	-0.0797727	0.0951413	0.401769	-0.0520468	0.153526	0.734602	-0.0319022	1.08115	1.08047
LTL-Stroke	LTL	Stroke	7.06036e-05	0.000183196	0.023211	0.00565611	0.0421137	0.0129139	0.00110974	-0.0103471	0.0225019	0.645636	-0.0335573	0.0409788	0.412847	-0.0618354	0.123257	0.615895	-0.0162254	1.08122	1.08351
C) MR results between leukocyte telomere length and six cardiovascular diseases
P-values lower 0.05 are considered significant and marked in dark blue.
Exposure	Outcome	method	Forward analysis				Reverse analysis
			nsnp	b	se	pval	nsnp	b	se	pval
LTL	AF	MR Egger	51	-0.00747494	0.0306525	0.808357	58	-0.0476628	0.0304649	0.12333
LTL	AF	Weighted median	51	-0.0104057	0.0193524	0.590788	58	0.00438083	0.0211226	0.835697
LTL	AF	Inverse variance weighted	51	0.0045614	0.0167902	0.785876	58	-0.0239863	0.0153598	0.118375
LTL	AF	Simple mode	51	0.00183863	0.0330041	0.955796	58	-0.0314988	0.048882	0.521911
LTL	AF	Weighted mode	51	0.00183863	0.017455	0.916531	58	-0.00474927	0.0239062	0.843234
LTL	CAD	MR Egger	51	-0.0575952	0.0380474	0.136507	82	0.0426874	0.0505579	0.401004
LTL	CAD	Weighted median	51	-0.0145669	0.0197568	0.460934	82	0.0200623	0.0245806	0.414394
LTL	CAD	Inverse variance weighted	51	-0.052719	0.0207988	0.0112541	82	0.00759289	0.0214292	0.723096
LTL	CAD	Simple mode	51	-0.0226721	0.0371494	0.54443	82	0.00122861	0.0557808	0.982482
LTL	CAD	Weighted mode	51	-0.0284578	0.0183161	0.126562	82	0.0274839	0.0272346	0.315906
LTL	VTE	MR Egger	51	0.0102315	0.0326316	0.755196	35	-0.0100582	0.048419	0.836714
LTL	VTE	Weighted median	51	0.0276087	0.0166556	0.0973937	35	-0.00851183	0.0283307	0.763837
LTL	VTE	Inverse variance weighted	51	0.015995	0.0178421	0.370001	35	0.0198336	0.0305289	0.515908
LTL	VTE	Simple mode	51	0.0187346	0.0342304	0.586601	35	-0.00371366	0.0499775	0.941202
LTL	VTE	Weighted mode	51	0.0222933	0.0157831	0.164002	35	0.00424832	0.01987	0.831976
LTL	HF	MR Egger	51	-0.0192141	0.0298024	0.522119	5	-0.299728	0.336603	0.438824
LTL	HF	Weighted median	51	0.00650434	0.0207963	0.75446	5	-0.0392829	0.0751869	0.601343
LTL	HF	Inverse variance weighted	51	-0.00220372	0.0163654	0.892883	5	-0.029971	0.0635166	0.637026
LTL	HF	Simple mode	51	0.0152756	0.0386308	0.694211	5	0.0360148	0.10453	0.747791
LTL	HF	Weighted mode	51	-0.000647531	0.0181858	0.971738	5	-0.0877668	0.0992305	0.426402
LTL	PAD	MR Egger	51	-0.0343555	0.0371943	0.360181	29	0.0598085	0.166924	0.722906
LTL	PAD	Weighted median	51	-0.0385285	0.0271239	0.155474	29	0.0114946	0.0284366	0.686051
LTL	PAD	Inverse variance weighted	51	-0.0319972	0.0203288	0.115492	29	-0.0152476	0.0234973	0.516397
LTL	PAD	Simple mode	51	-0.0464805	0.0508896	0.365436	29	0.0457641	0.0537211	0.401506
LTL	PAD	Weighted mode	51	-0.0383603	0.0239781	0.115942	29	0.0361937	0.0489059	0.46542
LTL	Stroke	MR Egger	51	0.00898266	0.0212981	0.675046	10	0.518014	0.623431	0.430124
LTL	Stroke	Weighted median	51	-0.00615186	0.0159912	0.700458	10	0.0450851	0.0765707	0.555993
LTL	Stroke	Inverse variance weighted	51	-0.00403581	0.0117036	0.730218	10	-0.065306	0.0946942	0.490413
LTL	Stroke	Simple mode	51	-0.0420667	0.0323495	0.199432	10	-0.00251911	0.140396	0.986076
LTL	Stroke	Weighted mode	51	-0.00460767	0.0157466	0.771028	10	0.095345	0.0980155	0.356093

## Sheet: Supplementary Table 7
Supplementary Table 7. Genomic risk loci identified for results of leukocyte telomere length and six cardiovascular diseases using FUMA
Note: for comparative purposes we report whether the identified loci overlap with the loci identified by PLACO analysis and reported by single trait GWAS analysis. We therefore defined the locus as 500 kb before and after the position of the index variant. Genomic risk loci association tests are two-sided and significance is determined by surpassing the genome-wide significance threshold, P < 5 x…
Trait	Locus	Unique SNP ID	rsID	Cytoband	CHR	BP	P	Start	End	nSNPs	nGWASSNPs	nIndSigSNPs	IndSigSNPs	nLeadSNPs	LeadSNPs	Functional annotation	CADD	RDB	position mapping	eqtl mapping	Results from LTL GWAS analysis							Results from CVD GWAS analysis							COLOC
																					ORLTL	PLTL	Overlap	TopSNP	CHR	Start	End	ORCVD	PCVD	Overlap	TopSNP	CHR	Start	End	PP.H1	PP.H2	PP.H3	PP.H4	Best causal SNP	SNP.PP.H4
LTL-AF	1	1:20916444:A:G	rs588485	1p36.12	1	20916444	2.41324e-09	20888348	20917206	15	5	1	rs588485	1	rs588485	intronic	5.19	NA	FAM43B, CDA	CDA	0.9842	1.2e-13	yes	rs66731853	1	20884619	20994278	1.0222	0.002028	no					0.878357	5.19498e-11	0.0584241	0.0632185	rs66731853	0.543819
LTL-AF	2	1:114091920:C:T	rs7528311	1p13.2	1	114091920	4.60475e-08	114075714	114361770	41	1	1	rs7528311	1	rs7528311	intronic	7.789	6	MAGI3, PHTF1, RSBN1, PTPN22	PHTF1, BCL2L15, AP4B1	0.9708	8.8e-15	yes	rs17464525	1	113922338	114555118	0.9701	0.01603	no					0.967104	2.2586e-30	0.0279098	0.00498611	rs17464525	0.999909
LTL-AF	3	1:154892388:A:G	rs151107921	1q21.3	1	154892388	1.69175e-08	154808959	154997491	8	4	3	rs1218577;rs151107921;rs115645567	2	rs1218577;rs151107921	intergenic	5.057	6	KCNN3, PMVK, ZBTB7B, DCST2, DCST1	DCST2, ADAM15	1.0094	0.0031	no					0.9222	3.007e-12	yes	rs11264280	1	154395125	155816085	4.61448e-75	0.977793	0.0188332	0.00337345	rs11264280	0.996849
LTL-AF	4	1:170643365:A:G	rs12024275	1q24.2	1	170643365	1.34183e-10	170617379	170643365	7	2	1	rs12024275	1	rs12024275	intronic	2.233	6	PRRX1	PRRX1	1.0077	0.0033	no					0.9252	2.56e-19	yes	rs72700114	1	169695491	170916201	1.10386e-49	0.97509	0.0130164	0.0118934	rs72700114	1
LTL-AF	5	2:17894461:C:T	rs6731131	2p24.2	2	17894461	8.40696e-12	17816326	17991974	156	102	3	rs6731131;rs300159;rs2081601	2	rs6731131;rs2081601	intronic	2.292	5	VSNL1, SMC6, GEN1, MSGN1	RAD51AP2, VSNL1, SMC6, GEN1, KCNS3	0.9857	1.6e-11	yes	rs2555104	2	17618105	17991974	0.9704	1.682e-05	no					0.185562	6.77782e-07	0.186117	0.62832	rs6731131	0.275431
LTL-AF	6	2:43542480:C:G	rs11690012	2p21	2	43542480	1.44101e-08	43450843	43602415	71	4	1	rs11690012	1	rs11690012	intronic	7.607	7	THADA, ZFP36L2	ZFP36L2, PLEKHH2, DYNC2LI1, SLC3A1	0.9875	1.2e-07	yes	rs6751209	2	43542480	43614036	1.0311	9.888e-05	no					0.386794	0.00169554	0.121699	0.484444	rs11690012	0.133414
LTL-AF	7	2:53947957:A:C	rs77601694	2p16.2	2	53947957	1.29981e-08	53947957	54387360	22	3	1	rs77601694	1	rs77601694	intronic	0.947	6	ASB3, CHAC2, ERLEC1, GPR75, PSME4, ACYP2	GPR75, ACYP2	0.9345	7e-22	yes	rs965109	2	53704374	54820213	1.0525	0.02733	no					0.938672	6.19235e-49	0.051125	0.010203	rs7562908	0.997903
LTL-AF	8	2:179380165:A:G	rs13029629	2q31.2	2	179380165	1.89754e-08	179380096	179562140	40	6	1	rs13029629	1	rs13029629	UTR3	8.997	7	PLEKHA3, TTN	PRKRA, FKBP7	1.0059	0.043	no					1.0972	3.964e-22	yes	rs2288327	2	179284643	179692967	1.12294e-20	0.979226	0.0158656	0.00490831	rs2288327	0.274049
LTL-AF	9	2:201160765:C:T	rs1367857	2q33.1	2	201160765	3.92789e-08	201080113	201206706	77	2	1	rs1367857	1	rs1367857	intergenic	3.694	5	SPATS2L	SATB2, C2orf69, TYW5, MAIP1, SPATS2L	0.9957	0.035	no					1.0651	4.04e-21	yes	rs3820888	2	200715388	201253956	1.74906e-18	0.742234	0.248463	0.00930234	rs56326533	0.245381
LTL-AF	10	3:141133450:A:G	rs1991431	3q23	3	141133450	4.9878e-09	141087623	141154542	28	20	1	rs1991431	1	rs1991431	intronic	2.414	3a	ZBTB38	ZBTB38	0.9916	2.9e-05	no					1.0359	1.274e-07	no					0.00161844	0.18939	0.0774669	0.727605	rs1991431	0.118453
LTL-AF	11	4:111487049:C:G	rs77955149	4q25	4	111487049	1.35606e-08	111486962	111489885	3	1	1	rs77955149	1	rs77955149	downstream	0.977	7	ENPEP	#N/A	1.0059	0.021	no					1.0795	3.253e-18	yes	rs1906611	4	111283206	112186199	0	0.974755	0.0217775	0.00346757	rs1906615	0.612862
LTL-AF	12	4:122798413:C:T	rs35495505	4q27	4	122798413	7.05596e-10	122661021	122846028	135	33	1	rs35495505	1	rs35495505	intergenic	3.737	5	SMIM43, EXOSC9, CCNA2, BBS7, TRPC3	SMIM43, EXOSC9, CCNA2, BBS7	0.9856	2.4e-12	yes	rs10024820	4	122660250	122846028	0.977	0.0007413	no					0.61105	4.90486e-08	0.0454499	0.343499	rs35495505	0.0922086
LTL-AF	13	4:164137902:C:T	rs76109254	4q32.2	4	164137902	7.69364e-09	164007217	164150166	47	10	1	rs76109254	1	rs76109254	intergenic	6.937	6	NAF1	#N/A	1.0359	2.4e-12	yes	rs6536702	4	164001188	164262654	1.0538	0.002955	no					0.944103	2.65221e-105	0.0507939	0.00510335	rs6536702	0.224323
LTL-AF	14	5:1283841:A:C	rs6420019	5p15.33	5	1283841	1.85696e-10	1215883	1284046	47	11	4	rs78844046;rs112333466;rs34041736;rs6420019	4	rs78844046;rs112333466;rs34041736;rs6420019	intronic	0.351	5	SLC6A19, SLC6A18, TERT	#N/A	0.972	1e-22	yes	rs7705526	5	1100831	1679863	1.0285	0.007695	no					0.876862	1.16103e-275	0.106168	0.0169697	rs7705526	1
LTL-AF	15	5:172670745:G:T	rs6891790	5q35.1	5	172670745	1.84004e-11	172643118	172677471	30	16	2	rs6891790;rs869236	1	rs6891790	intergenic	0.617	4	NKX2-5	BNIP1	0.9936	0.0039	no					0.9297	4.531e-22	yes	rs6891790	5	172473495	172677800	1.10051e-17	0.944641	0.0112603	0.0440986	rs6891790	0.510243
LTL-AF	16	6:25772047:A:G	rs4712972	6p22.2	6	25772047	7.2938e-09	25700342	26131792	85	2	1	rs4712972	1	rs4712972	intronic	1.266	6	SCGN, SLC17A4, SLC17A1, SLC17A3, SLC17A2, TRIM38, H1-1, H4C2, H1-2, HFE, H4C3, H1-6, H2BC4, H2AC6	TRIM38	0.9784	4.4e-15	yes	rs13198474	6	24988105	29612325	0.9738	0.008004	no					0.939245	5.30061e-15	0.0468823	0.0138731	rs13198474	0.0835261
LTL-AF	17	6:27242681:A:G	rs9393801	6p22.1	6	27242681	4.57897e-09	26801811	27254967	120	4	2	rs9393801;rs994691	1	rs9393801	intergenic	0.268	4	H2BC11, H2AC11, H2BC12, PRSS16, POM121L2	BTN2A2, BTN3A3, HMGN4, ABT1, ZNF322, H2BC11, H2BC12, PRSS16, ZNF391, ZNF165	0.9876	1.9e-09	yes	rs13198474	6	24988105	29612325	0.9752	0.0003621	no					0.839973	1.15937e-11	0.144908	0.015119	rs67092078	0.0999668
LTL-AF	18	6:122387521:C:T	rs9372676	6q22.31	6	122387521	3.36267e-09	122386599	122620058	147	5	2	rs9372676;rs13196347	1	rs9372676	intergenic	2.833	4	#N/A	TBC1D32, SERINC1	1.0067	0.00094	no					0.9553	6.586e-12	yes	rs13195459	6	121907968	122940296	2.67084e-15	0.972819	0.016114	0.0110665	rs72966339	0.122408
LTL-AF	19	7:76311520:C:T	rs3852312	7q11.23	7	76311520	6.63824e-09	76311520	76390872	43	1	1	rs3852312	1	rs3852312	intronic	11.27	NA	UPK3B	RHBDD2, SSC4D, ZP3, DTX2, UPK3B, POMZP3	0.9892	8.2e-08	yes	rs38664	7	76047900	76390970	1.0291	5.181e-05	no					0.725027	0.000291182	0.0478767	0.222416	rs3852312	0.436037
LTL-AF	20	7:116200092:C:T	rs9920	7q31.2	7	116200092	9.39538e-11	116057837	116212511	45	5	2	rs9920;rs10270569	1	rs9920	UTR3	2.615	5	CAV2, CAV1	TES, CAV2, CAV1	0.9908	0.005	no					0.902	5.067e-20	yes	rs11773845	7	115554257	116226422	4.68096e-51	0.986314	0.0126268	0.00105887	rs11773845	0.589976
LTL-AF	21	7:124911169:C:T	rs10280078	7q31.33	7	124911169	2.85592e-09	124844945	124928978	45	20	1	rs10280078	1	rs10280078	ncRNA_intronic	3.209	7	#N/A	#N/A	0.9807	2.5e-19	yes	rs7790856	7	124157107	124928978	0.9827	0.01537	no					0.975975	2.57485e-82	0.0201198	0.00390546	rs7790856	0.306117
LTL-AF	22	8:17913970:A:G	rs7508	8p22	8	17913970	2.40971e-11	17722615	17944663	324	26	3	rs7508;rs208026;rs6988638	1	rs7508	UTR3	0.22	NA	FGL1, PCM1, ASAH1	PCM1, ASAH1	1.0068	0.0025	no					0.9314	1.691e-21	yes	rs7508	8	17634746	17945990	4.84797e-16	0.85089	0.0568437	0.0922668	rs7508	0.976506
LTL-AF	23	8:21872328:A:G	rs10097055	8p21.3	8	21872328	3.5931e-18	21770372	21900757	146	56	7	rs7814195;rs34539595;rs4872083;rs10097055;rs11135789;rs4872220;rs900779	2	rs7814195;rs10097055	intergenic	3.639	5	DOK2, XPO7, NPM2, FGF17, DMTN	GFRA2, DOK2, XPO7, FGF17, DMTN, REEP4	1.0204	1.9e-23	yes	rs2306646	8	21770372	21900757	1.0309	4.782e-06	yes	rs7834729	8	21775838	21880741	4.54672e-05	5.774e-19	0.995502	0.00445237	rs2306646	0.146656
LTL-AF	24	9:34071144:A:C	rs10758239	9p13.3	9	34071144	3.23439e-10	33785245	34074051	120	76	2	rs10758239;rs7871764	1	rs10758239	intergenic	0.368	2a	PRSS3, UBE2R2, UBAP2	AQP7, UBAP2, UBAP1, NUDT2, IL11RA	1.0117	7.2e-09	yes	rs11557154	9	33758674	34149119	1.0285	2.266e-05	no					0.843048	9.44811e-25	0.152408	0.00454318	rs11557154	0.552737
LTL-AF	25	9:109639970:C:T	rs4743037	9q31.2	9	109639970	8.86526e-11	109554690	109675354	78	31	3	rs4743037;rs954585;rs1567451	1	rs4743037	intronic	4.652	6	ZNF462	#N/A	1.0149	5.1e-10	yes	rs4743037	9	109554690	109670016	1.0333	2.901e-05	no					0.0466871	3.67843e-05	0.01933	0.933861	rs4743037	0.698508
LTL-AF	26	10:104147866:C:T	rs72845686	10q24.32	10	104147866	1.14022e-11	103423357	104197327	124	17	4	rs72845686;rs72844629;rs56407876;rs10786662	1	rs72845686	intergenic	0.107	6	FBXW4, OGA, KCNIP2, ARMH3, HPS6, PPRC1, ELOVL3, PITX3, GBF1, NFKB2, PSD, FBXL15, CUEDC2	ARMH3, HPS6, PITX3, CUEDC2, MFSD13A, AS3MT	1.0153	4.1e-08	yes	rs4919611	10	103562838	104197327	1.0474	2.112e-07	yes	rs11598047	10	103555611	105720351	3.36938e-07	1.85025e-09	0.999999	4.92428e-07	rs4919611	0.616304
LTL-AF	27	10:105492847:C:T	rs34178838	10q24.33	10	105492847	2.15091e-28	105322617	106146144	303	132	30	rs10883882;rs2236209;rs35056927;rs12415095;rs141221125;rs3781339;rs12244353;rs7919263;rs2047036;rs7088114;rs10883906;rs12777678;rs2073341;rs10786770;rs7915079;rs11596890;rs34178838;rs12761815;rs4540778;rs61861110;rs73340551;rs11814244;rs4918054;rs11191835;rs10786776;rs56093138;rs1418318;rs805686;rs34260939;rs10883969	13	rs10883882;rs12415095;rs141221125;rs3781339;rs2047036;rs12777678;rs34178838;rs4540778;rs11191835;rs1418318;rs805686;rs34260939;rs10883969	intronic	1.084	2b	NEURL1, SH3PXD2A, STN1, SLK, COL17A1, SFR1, CFAP43, CFAP58	WBP1L, NEURL1, SH3PXD2A, STN1, SLK, COL17A1, CFAP43, GSTO1, GSTO2	1.0445	1.4e-20	yes	rs9419958	10	105464082	106328016	1.1268	1.392e-15	yes	rs11598047	10	103555611	105720351	8.33078e-59	2.69375e-160	1	9.04076e-45	rs9419958	0.395491
LTL-AF	28	11:205198:A:C	rs3782123	11p15.5	11	205198	4.28766e-11	179460	270514	42	10	2	rs3782123;rs536715	1	rs3782123	ncRNA_intronic	12.8	NA	BET1L, SCGB1C1, CIMAP1A, RIC8A, SIRT3, PSMD13, NLRP6	BET1L, SCGB1C1, RIC8A, SIRT3, PSMD13, PGGHG, IFITM2, SIGIRR	0.9783	2.5e-22	yes	rs939916	11	176442	270514	1.0218	0.004035	no					0.676698	9.69029e-23	0.111301	0.212002	rs939916	0.999999
LTL-AF	29	12:24773658:C:G	rs7953024	12p12.1	12	24773658	1.25667e-14	24638802	24822366	105	75	5	rs7953024;rs10842363;rs11047492;rs2291437;rs7976009	1	rs7953024	intergenic	6.617	6	#N/A	#N/A	0.9868	3.9e-07	yes	rs12369950	12	24744105	24822366	1.0672	1.892e-13	yes	rs4963776	12	24591890	24920794	1.12149e-19	0.00251454	0.997478	7.16116e-06	rs10842383	0.139304
LTL-AF	30	14:64773392:A:G	rs3020449	14q23.2	14	64773392	2.42546e-14	64258373	65615653	454	255	12	rs79988539;rs79238083;rs3020449;rs34110441;rs11158540;rs3951150;rs4027395;rs2781379;rs1152577;rs12435857;rs2057130;rs2093989	4	rs79988539;rs3020449;rs2057130;rs2093989	intronic	8.802	NA	SYNE2, ESR2, MTHFD1, ZBTB25, AKAP5, ZBTB1, HSPA2, PPP1R36, FNTB, MAX	SYNE2, ESR2, MTHFD1, ZBTB25, ZBTB1, PPP1R36, PLEKHG3, CHURC1, FNTB, RAB15, MAX	1.0081	7.4e-05	yes	rs45604339	14	64846224	65628009	0.9388	8.747e-21	yes	rs2738413	14	64612845	64878265	9.46817e-25	1.53662e-05	0.999984	6.51615e-07	rs2738413	0.629434
LTL-AF	31	14:73481868:A:G	rs12891951	14q24.2	14	73481868	1.14004e-15	73247503	73725028	329	138	14	rs10130873;rs17121101;rs2110552;rs12586488;rs11622784;rs2215590;rs2332922;rs79442944;rs61986549;rs3742829;rs78387414;rs118055934;rs8007376;rs12891951	4	rs10130873;rs2110552;rs79442944;rs12891951	intronic	2.283	5	DPF3, DCAF4, ZFYVE1, RBM25, PSEN1, PAPLN	DPF3, DCAF4, ZFYVE1, PSEN1, HEATR4, ACOT2, ACOT4, FAM161B	1.016	3e-14	yes	rs3815460	14	73183749	74217790	1.0363	2.343e-07	yes	rs74884082	14	73245571	73940636	0.000185808	8.28651e-37	0.999809	5.0575e-06	rs3815460	0.146057
LTL-AF	32	14:91906186:C:G	rs11621425	14q32.12	14	91906186	1.06134e-10	91871672	92057960	177	80	2	rs11621425;rs1961541	1	rs11621425	intergenic	1.489	6	CCDC88C, PPP4R3A, CATSPERB	CCDC88C	0.9836	6.2e-16	yes	rs8006485	14	91836982	92099719	0.9785	0.001379	no					0.905334	2.86902e-17	0.0656617	0.0290043	rs10134560	0.0369233
LTL-AF	33	15:41974660:C:T	rs4924570	15q15.1	15	41974660	6.73288e-14	41892061	42146189	75	24	2	rs4924570;rs2616	1	rs4924570	intronic	5.644	6	MGA, MAPKBP1, PLA2G4B, JMJD7, SPTBN5	NDUFAF1, LTK, RPAP1, MGA, MAPKBP1, PLA2G4B, JMJD7, SPTBN5, EHD4	1.0207	2.3e-22	yes	rs17677991	15	41798762	42214769	1.025	0.000422	no					0.631748	7.14262e-21	0.0533981	0.314853	rs17677991	0.199875
LTL-AF	34	15:50382176:C:T	rs12101762	15q21.2	15	50382176	1.60514e-09	50382176	50460968	11	4	3	rs12101762;rs11632390;rs77748036	2	rs12101762;rs77748036	intronic	12.14	7	ATP8B4	DTWD1, GABPB1	1.0168	1.9e-16	yes	rs41362650	15	50195949	50797021	1.0186	0.006171	no					0.901638	9.77269e-40	0.0697616	0.0286007	rs12903325	0.293423
LTL-AF	35	15:74336633:C:T	rs5742915	15q24.1	15	74336633	5.03975e-10	74336633	74354152	4	2	2	rs5742915;rs4886868	1	rs5742915	exonic	8.73	5	PML, GOLGA6A	STOML1	1.0195	1.6e-21	yes	rs5742915	15	74248477	74354152	1.0171	0.01171	no					0.664767	5.27568e-15	0.284005	0.0512277	rs5742915	0.999962
LTL-AF	36	16:28829228:A:G	rs28888764	16p11.2	16	28829228	8.15088e-09	28826049	29008079	43	5	1	rs28888764	1	rs28888764	downstream	2.913	7	ATXN2L, TUFM, SH2B1, ATP2A1, RABEP2, CD19, NFATC2IP, SPNS1, LAT	XPO6, NPIPB6, CLN3, IL27, NUPR1, SGF29, SULT1A2, SULT1A1, TUFM, SH2B1, NFATC2IP, SPNS1, LAT	0.9913	3.6e-05	yes	rs12598357	16	28338039	28895130	0.9643	4.607e-07	no					0.064254	0.0074553	0.91178	0.015985	rs28888764	0.221976
LTL-AF	37	16:69362452:C:G	rs2242413	16q22.1	16	69362452	5.81605e-10	69141138	69432250	127	36	1	rs2242413	1	rs2242413	UTR3	2.544	2b	HAS3, CHTF8, UTP4, SNTB2, VPS4A, COG8, PDF, NIP7, TMED6, TERF2	UTP4, SNTB2, VPS4A, COG8, PDF, NIP7, TMED6, TERF2	1.0195	1.8e-19	yes	rs3785074	16	69086332	70646213	0.9804	0.005693	no					0.91214	6.15145e-22	0.0638586	0.0240018	rs3785074	0.319351
LTL-AF	38	16:73130109:C:T	rs9925320	16q22.3	16	73130109	2.68461e-08	73087494	73138222	9	3	2	rs4788697;rs9925320	2	rs4788697;rs9925320	intergenic	6.75	4	ZFHX3	#N/A	1.0083	0.00015	no					1.0378	2.526e-07	yes	rs2359171	16	72998236	73102243	8.56258e-85	7.85637e-05	0.999921	1.70888e-07	rs2359171	0.810149
LTL-AF	39	16:88093520:A:G	rs11117355	16q24.2	16	88093520	4.61706e-10	87984597	88119455	176	12	3	rs11117355;rs12933708;rs7501339	1	rs11117355	intronic	2.176	5	BANP	#N/A	0.9788	1.6e-23	yes	rs11117354	16	87974570	88202519	0.9829	0.01603	no					0.900021	8.8988e-21	0.0543218	0.0456574	rs11117354	0.350559
LTL-AF	40	17:1687796:A:G	rs3815612	17p13.3	17	1687796	1.24869e-10	1666132	1733139	80	26	2	rs3815612;rs57599098	1	rs3815612	intronic	0.996	5	SERPINF2, SERPINF1, SMYD4, RPA1	SERPINF1, SMYD4, RPA1	0.9806	1e-18	yes	rs7218033	17	1660801	2584946	1.0222	0.00263	no					0.00269558	3.01977e-16	0.997197	0.000107448	rs7217857	0.441143
LTL-AF	41	17:65705530:A:G	rs7209057	17q24.2	17	65705530	2.95497e-08	65684452	65754005	28	1	1	rs7209057	1	rs7209057	intergenic	2.063	7	PITPNC1, NOL11	#N/A	0.9883	5.7e-09	yes	rs7209057	17	65684452	65754005	0.9777	0.0008617	no					0.589088	0.00113129	0.102992	0.300337	rs7209057	0.431604
LTL-AF	42	18:51765766:G:T	rs12956505	18q21.2	18	51765766	7.40428e-09	51764473	51776460	28	19	2	rs12956505;rs6508285	1	rs12956505	intergenic	2.957	5	#N/A	MBD2, POLI, C18orf54	1.0204	3.8e-20	yes	rs2276182	18	51640653	52468402	0.983	0.01837	no					0.910102	3.16636e-25	0.0854009	0.00449758	rs2276182	0.094282
LTL-AF	43	19:22313901:C:T	rs62112369	19p12	19	22313901	2.90745e-09	22226580	22455077	247	6	2	rs62112369;rs283144	1	rs62112369	ncRNA_intronic	1.505	7	ZNF257, ZNF676	ZNF493, ZNF208, ZNF257, ZNF676, ZNF98	1.0252	2.3e-22	yes	rs8105767	19	22076395	22722254	1.0192	0.02593	no					0.828421	2.63781e-44	0.06105	0.110529	rs8105767	0.999919
LTL-AF	44	20:62553433:C:T	rs7264220	20q13.33	20	62553433	1.72311e-08	62496843	62569982	17	3	2	rs7264220;rs6062570	1	rs7264220	intronic	0.688	7	ABHD16B, TPD52L2, DNAJC5, UCKL1	TPD52L2, DNAJC5, UCKL1, PRPF6	0.9643	1.3e-22	yes	rs35640778	20	61726373	62811392	0.9744	0.04526	no					0.956018	5.58424e-189	0.0317575	0.0122242	rs35640778	1
LTL-AF	45	22:17436846:A:G	rs2385786	22q11.1	22	17436846	7.18471e-10	17430931	17458882	11	4	2	rs2385786;rs5992593	1	rs2385786	intergenic	3.612	5	GAB4	#N/A	0.9845	5.2e-15	yes	rs28502153	22	17414640	17488195	0.9797	0.002458	no					0.938304	2.38104e-20	0.0361738	0.0255223	rs28502153	0.441482
LTL-AF	46	22:45768749:C:G	rs6007002	22q13.31	22	45768749	2.0247e-08	45696739	45813890	82	13	2	rs56693139;rs6007002	2	rs56693139;rs6007002	intronic	0.118	7	UPK3A, FAM118A, SMC1B, RIBC2	UPK3A, FAM118A, SMC1B, RIBC2	1.0145	7.7e-12	yes	rs6007020	22	45729382	45813890	0.9793	0.003053	no					0.689448	6.08785e-07	0.165385	0.145164	rs6007002	0.0818618
LTL-AF	47	22:50944163:A:G	rs128941	22q13.33	22	50944163	1.27683e-09	50944163	50974100	14	3	2	rs128941;rs131813	1	rs128941	exonic	13.24	NA	LMF2, NCAPH2, TYMP, CIMAP1B	LMF2, NCAPH2, TYMP, CIMAP1B, CPT1B, CHKB, ARSA	1.0175	3.6e-17	yes	rs131794	22	50795620	51072289	0.9804	0.004749	no					0.879127	1.73685e-18	0.108104	0.0127686	rs131793	0.341293
LTL-CAD	1	1:20915701:A:C	rs2072671	1p36.12	1	20915701	2.32151e-08	20888348	20917206	14	1	1	rs2072671	1	rs2072671	exonic	22.8	3a	FAM43B, CDA	CDA	0.9828	2.4e-16	yes	rs66731853	1	20884619	20994278	1.015	0.004882	no					0.889596	3.78307e-11	0.0425236	0.0678802	rs2072671	0.672586
LTL-CAD	2	1:114448752:C:T	rs10858023	1p13.2	1	114448752	5.1908e-18	114078037	114449117	148	60	4	rs10858023;rs1539437;rs2185827;rs1217401	1	rs10858023	intronic	2.999	7	MAGI3, PHTF1, RSBN1, PTPN22, BCL2L15, AP4B1, DCLRE1B	MAGI3, BCL2L15, AP4B1, DCLRE1B, BCAS2	0.9819	4.7e-18	yes	rs17464525	1	113922338	114555118	1.0312	2.901e-09	yes	rs1230666	1	114075796	114451425	9.77229e-07	8.09102e-29	0.999999	3.82194e-09	rs17464525	0.99995
LTL-CAD	3	1:222722330:C:T	rs34630232	1q41	1	222722330	1.94545e-09	222720697	222782416	67	9	2	rs34630232;rs74145503	1	rs34630232	upstream	5.342	6	HHIPL2, TAF1A, MIA3	HHIPL2, TAF1A, AIDA, BROX, FAM177B	0.994	0.0033	no					0.9626	3.333e-13	yes	rs17163363	1	222638446	222958142	3.2239e-32	0.987645	0.00951719	0.00283777	rs35158675	0.117371
LTL-CAD	4	1:226619227:A:T	rs10915994	1q42.12	1	226619227	5.62983e-16	226609339	226702300	133	84	4	rs10915994;rs4653742;rs10799355;rs583607	1	rs10915994	intergenic	13.26	5	#N/A	PARP1	0.9757	1.6e-23	yes	rs932002	1	226536645	226741284	1.0279	4.129e-06	no					0.386832	1.05043e-40	0.499356	0.113812	rs907187	0.148056
LTL-CAD	5	2:21315664:C:T	rs503105	2p24.1	2	21315664	3.72819e-08	21265518	21450824	270	1	1	rs503105	1	rs503105	intergenic	0.191	NA	APOB	APOB	0.9946	0.032	no					0.95	2.926e-16	yes	rs515135	2	21179426	21471603	7.15365e-15	0.98691	0.00921979	0.00387061	rs515135	0.544437
LTL-CAD	6	2:29075031:C:T	rs11690571	2p23.2	2	29075031	4.06392e-10	28968811	29101402	131	77	1	rs11690571	1	rs11690571	intronic	4.385	6	PPP1CB, SPDYA, TRMT61B	PPP1CB, SPDYA, TRMT61B, TOGARAM2	1.0141	3.1e-12	yes	rs56178008	2	28968811	29180267	0.9806	7.529e-05	no					0.306718	1.69408e-07	0.0594515	0.633829	rs11690571	0.308775
LTL-CAD	7	2:43582103:A:T	rs11124929	2p21	2	43582103	1.93744e-08	43450843	43721954	73	8	2	rs11124929;rs2163228	1	rs11124929	intronic	2.301	5	THADA, ZFP36L2	THADA, ZFP36L2, PLEKHH2, DYNC2LI1, SLC3A1	0.9854	4.3e-08	yes	rs6751209	2	43542480	43614036	1.0275	4.609e-05	no					1.71639e-13	0.0136908	0.986295	1.4743e-05	rs4245791	0.388516
LTL-CAD	8	2:85814984:C:T	rs10206961	2p11.2	2	85814984	1.29314e-13	85692999	85893292	173	41	8	rs72838587;rs2166530;rs6722691;rs1049363;rs11695848;rs10206961;rs72843872;rs6733550	2	rs72838587;rs10206961	intronic	3.187	4	MAT2A, GGCX, VAMP8, VAMP5, RNF181, TMEM150A, USP39, C2orf68, SFTPB	RETSAT, MAT2A, GGCX, VAMP8, VAMP5, RNF181, TMEM150A, USP39	1.0065	0.0015	no					1.053	2.906e-23	yes	rs10176176	2	85689845	85893292	2.36997e-26	0.94356	0.0394691	0.0169707	rs10176176	0.118555
LTL-CAD	9	2:204367311:A:G	rs139644567	2q33.2	2	204367311	4.27307e-09	203650267	204415465	192	49	2	rs139644567;rs1048013	1	rs139644567	intronic	4.425	6	ICA1L, WDR12, CARF, NBEAL1, CYP20A1, ABI2, RAPH1	FAM117B, ICA1L, CARF, NBEAL1, CD28	1.0087	0.033	no					1.102	6.356e-20	yes	rs148812085	2	203050678	204544427	1.58151e-45	0.984195	0.011978	0.00382728	rs148812085	0.450725
LTL-CAD	10	2:216299629:C:G	rs1250247	2q35	2	216299629	1.6321e-13	216287093	216306635	15	15	1	rs1250247	1	rs1250247	intronic	5.394	3a	FN1	#N/A	1.0083	0.00027	no					1.0493	2.373e-18	yes	rs1250247	2	216287093	216316487	3.36664e-12	0.0190807	0.965725	0.0151939	rs1250247	0.386675
LTL-CAD	11	3:49910084:C:T	rs1317154	3p21.31	3	49910084	1.06889e-14	49296069	50250837	616	381	7	rs1317154;rs9812936;rs13100903;rs2526388;rs3774751;rs2878298;rs11718165	1	rs1317154	downstream	9.246	5	IHO1, C3orf62, USP4, GPX1, RHOA, TCTA, AMT, NICN1, DAG1, BSN, APEH, MST1, RNF123, AMIGO3, GMPPB, IP6K1, CDHR4, INKA1, UBA7, TRAIP, CAMKV, MST1R, MON1A, RBM6, RBM5, SEMA3F, GNAT1	ATRIP, TREX1, SLC26A6, NCKIPSD, IP6K2, PRKAR2A, ARIH2, P4HTM, WDR6, DALRD3, NDUFAF3, QRICH1, LAMB2, CCDC71, KLHDC8B, IHO1, C3orf62, USP4, GPX1, RHOA, TCTA, AMT, NICN1, DAG1, BSN, APEH, MST1, RNF123, GMPPB, IP6K1, CDHR4, INKA1, UBA7, MST1R, MON1A, RBM6, RBM5, SEMA3F, GNAI2, IFRD2, HYAL3, NAA80, HYAL1, RASSF1, CYB561D2, CACNA2D2, C3orf18, HEMK1, DOCK3	0.985	5.2e-14	yes	rs7634084	3	49385350	50250837	1.0276	4.271e-08	yes	rs34759087	3	48570686	50209053	1.0502e-05	4.12829e-09	0.991317	0.00867277	rs2230590	0.211485
LTL-CAD	12	3:138173905:A:G	rs56236670	3q22.3	3	138173905	1.84058e-14	138005082	138640704	577	294	6	rs56236670;rs550768;rs4678406;rs6766859;rs7624365;rs1109088	1	rs56236670	intronic	0.259	5	ARMC8, NME9, MRAS, ESYT3, CEP70, FAIM, PIK3CB	A4GNT, MRAS, ESYT3, CEP70, FAIM, PIK3CB	0.987	6.3e-11	yes	rs9878436	3	138133682	138640704	1.0309	6.513e-10	yes	rs185244	3	137906532	138347164	5.30502e-13	2.60096e-07	1	4.03386e-09	rs185244	0.267708
LTL-CAD	13	4:57781754:A:G	rs781663	4q12	4	57781754	1.59015e-08	57717475	57841213	50	6	1	rs781663	1	rs781663	intronic	6.603	5	REST, NOA1, POLR2B	REST	0.9914	0.00074	no					1.0437	1.074e-11	yes	rs781663	4	57708306	57841213	1.6505e-07	0.799942	0.0352	0.164854	rs781663	0.282377
LTL-CAD	14	4:120941284:A:G	rs3956507	4q27	4	120941284	1.83409e-08	120918509	120968070	51	10	1	rs3956507	1	rs3956507	intergenic	0.017	6	MAD2L1	PDE5A	0.9928	0.00082	no					1.0366	1.019e-11	yes	rs7678555	4	120056815	120968070	3.38747e-10	0.690879	0.287457	0.0216646	rs7678555	0.961734
LTL-CAD	15	4:164088326:C:T	rs1814591	4q32.2	4	164088326	1.39124e-08	164018305	164088326	3	1	1	rs1814591	1	rs1814591	upstream	7.613	NA	NAF1	#N/A	0.9632	1.6e-15	yes	rs6536702	4	164001188	164262654	0.9724	0.01852	no					0.898393	5.15002e-105	0.0986379	0.00296875	rs6536702	0.228456
LTL-CAD	16	5:1287505:C:T	rs7710703	5p15.33	5	1287505	3.63907e-14	1287505	1298645	7	2	2	rs7710703;rs3888705	2	rs7710703;rs3888705	intronic	0.115	7	TERT	CLPTM1L	1.0247	8.8e-16	yes	rs7705526	5	1100831	1679863	0.9611	7.361e-07	no					0.0432795	6.26098e-275	0.57223	0.38449	rs7705526	1
LTL-CAD	17	5:138930963:A:G	rs59398207	5q31.2	5	138930963	1.59638e-09	138910791	139037014	71	46	1	rs59398207	1	rs59398207	intronic	2.124	4	UBE2D2, CXXC5	STING1	1.029	7.3e-13	yes	rs11745986	5	138911593	139060486	0.9631	0.0002973	no					0.568332	1.05384e-12	0.177372	0.254296	rs11745986	0.100015
LTL-CAD	18	6:57120578:C:T	rs7757492	6p11.2	6	57120578	1.21504e-08	57107322	57160572	21	3	1	rs7757492	1	rs7757492	intergenic	0.628	5	#N/A	DST, BEND6, ZNF451, BAG2, RAB23	1.0077	0.00044	no					0.9656	3.934e-11	yes	rs11752218	6	56903750	57161226	7.13556e-10	0.887611	0.110534	0.00185469	rs11752218	0.0724472
LTL-CAD	19	6:97067047:C:T	rs10457174	6q16.1	6	97067047	1.40342e-08	96841762	97067047	205	5	1	rs10457174	1	rs10457174	intergenic	0.062	7	UFL1, FHL5	UFL1, FHL5, GPR63	0.9912	0.00053	no					0.9652	1.545e-08	yes	rs2983896	6	96841762	97067047	1.06358e-05	0.87267	0.0305589	0.096458	rs9486719	0.0575518
LTL-CAD	20	6:134171479:A:G	rs1029212	6q23.2	6	134171479	1.02e-08	134159812	134205092	17	2	1	rs1029212	1	rs1029212	ncRNA_intronic	2.74	NA	TCF21	TCF21, SLC2A12	1.0037	0.062	no					1.0487	2.236e-22	yes	rs2327426	6	133992791	134379869	1.6155e-25	0.983203	0.0152733	0.00152347	rs2327426	0.441968
LTL-CAD	21	6:160765589:A:T	rs637575	6q25.3	6	160765589	6.16318e-09	160683269	161125454	207	18	4	rs637575;rs412633;rs9457931;rs11751347	3	rs637575;rs9457931;rs11751347	intergenic	0.29	5	SLC22A2, SLC22A3, LPA, PLG	ACAT2, MRPL18, MAS1, SLC22A3, LPA	1.0067	0.002	no					0.9588	1.902e-15	yes	rs10455872	6	160185151	161682569	5.32317e-181	0.983129	0.0150118	0.0018596	rs10455872	0.734571
LTL-CAD	22	7:32369148:A:G	rs215634	7p14.3	7	32369148	2.29116e-08	32261351	32399658	92	3	1	rs215634	1	rs215634	intergenic	1.705	7	PDE1C	#N/A	0.9906	4.5e-06	no					1.0245	1.554e-06	no					0.015666	0.0775648	0.0511646	0.832235	rs215634	0.274489
LTL-CAD	23	7:99752566:A:G	rs55839153	7q22.1	7	99752566	2.93088e-10	98892724	99892017	212	36	2	rs58348977;rs55839153	2	rs58348977;rs55839153	UTR3	4.243	4	ARPC1A, ARPC1B, PDAP1, BUD31, PTCD1, CPSF4, ATP5MF, ZNF789, ZNF394, ZKSCAN5, FAM200A, ZNF655, ZSCAN25, CYP3A5, CYP3A7, CYP3A43, OR2AE1, TRIM4, ZKSCAN1, COPS6, MCM7, AP4M1, TAF6, LAMTOR4, TRAPPC14, GAL3ST4, GPC2, STAG3, PVRIG	ARPC1B, PTCD1, CPSF4, ATP5MF, ZKSCAN5, CYP3A5, TRIM4, ZKSCAN1, ZSCAN21, ZNF3, COPS6, AP4M1, TAF6, CNPY4, LAMTOR4, TRAPPC14, GAL3ST4, GPC2, STAG3, PILRB, PILRA, ZCWPW1, SPACDR, TSC22D4, NYAP1	0.9798	5.4e-16	yes	rs2056726	7	99699436	100111776	0.9816	0.004073	no					0.103073	1.02998e-14	0.892988	0.00393872	rs2056726	0.159042
LTL-CAD	24	7:107131528:A:T	rs2237671	7q22.3	7	107131528	1.85159e-08	106796537	107304196	224	21	1	rs2237671	1	rs2237671	intronic	5.439	6	PRKAR2B, HBP1, COG5, GPR22, DUS4L, BCAP29, SLC26A4	COG5, SLC26A4, THAP5	1.008	0.00085	no					1.0342	7.738e-09	yes	rs12112877	7	106796537	107304628	2.92315e-06	0.903667	0.0346433	0.0616106	rs12112877	0.0543201
LTL-CAD	25	7:129663496:C:T	rs11556924	7q32.2	7	129663496	3.27462e-20	129632081	129696462	33	8	3	rs11556924;rs11768743;rs35374412	1	rs11556924	exonic	28	1f	ZC3HC1	KLHDC10	1.0129	6.8e-10	yes	rs11556924	7	129663496	129685597	0.9514	3.777e-21	yes	rs11556924	7	129632081	129696462	2.3226e-17	5.4506e-06	0.000413441	0.999581	rs11556924	0.974639
LTL-CAD	26	8:19870015:G:T	rs34942551	8p21.3	8	19870015	6.23865e-10	19815556	19870271	97	64	1	rs34942551	1	rs34942551	intergenic	1.674	5	LPL	LPL	0.9936	0.0054	no					0.9555	7.863e-16	yes	rs894211	8	19747678	19943308	6.56869e-13	0.944043	0.021568	0.0343891	rs894211	0.0497796
LTL-CAD	27	8:21853733:C:T	rs67385415	8p21.3	8	21853733	1.45597e-10	21770372	21872853	131	49	2	rs67385415;rs11135735	1	rs67385415	intronic	0.151	6	DOK2, XPO7, NPM2	GFRA2, XPO7, FGF17	0.9832	6.3e-17	yes	rs2306646	8	21770372	21900757	0.9857	0.00413	no					5.94197e-07	5.80006e-19	0.999999	1.07584e-08	rs2306646	0.12129
LTL-CAD	28	8:95577129:C:T	rs28729295	8q22.1	8	95577129	1.09125e-09	95432517	95578426	100	19	1	rs28729295	1	rs28729295	ncRNA_intronic	0.144	6	RAD54B, FSBP, VIRMA	FSBP, VIRMA, DPY19L4	0.9839	2.7e-13	yes	rs1023767	8	95330332	95637940	1.0193	0.0002908	no					0.00444678	3.94456e-09	0.995306	0.000247005	rs1023767	0.0763392
LTL-CAD	29	9:22062012:A:C	rs4977754	9p21.3	9	22062012	3.23495e-09	22056302	22062012	2	1	1	rs4977754	1	rs4977754	ncRNA_exonic	1.282	7	#N/A	#N/A	0.9851	0.0017	no					0.9214	2.246e-11	yes	rs2891168	9	21683805	22138762	1.20641e-272	0.986471	0.0123038	0.00122541	rs2891168	0.73962
LTL-CAD	30	10:94464307:G:T	rs12778642	10q23.33	10	94464307	3.261e-10	94248310	94485763	75	19	1	rs12778642	1	rs12778642	intergenic	1.288	7	IDE, KIF11, HHEX	HHEX, FRA10AC1	0.9898	3.4e-07	yes	rs10882100	10	94336963	94495241	0.9763	2.463e-06	no					0.0561984	0.0103532	0.596704	0.33577	rs12778642	0.215064
LTL-CAD	31	10:95995314:A:T	rs10882411	10q22.33	10	95995314	1.20152e-09	95976932	96024357	21	3	2	rs10882411;rs60341058	1	rs10882411	intronic	4.08	5	PLCE1	PLCE1, HELLS	0.9861	5.1e-10	yes	rs12572897	10	95958289	96757047	0.9804	0.0003288	yes	rs55753709	10	95974488	96040394	1.22449e-07	2.06876e-20	1	7.08173e-10	rs12572897	0.578926
LTL-CAD	32	10:103893336:G:T	rs2815403	10q24.32	10	103893336	2.96722e-09	103562838	104197327	26	8	2	rs2815403;rs112877672	1	rs2815403	intronic	18.4	2b	OGA, KCNIP2, ARMH3, HPS6, PPRC1, ELOVL3, PITX3, GBF1, NFKB2, PSD, FBXL15, CUEDC2	ARMH3, HPS6, PITX3	1.0243	1.3e-14	yes	rs4919611	10	103562838	104197327	0.9761	0.0009773	no					0.0600881	1.70235e-09	0.920046	0.0198663	rs4919611	0.544583
LTL-CAD	33	10:105706259:G:T	rs35168839	10q24.33	10	105706259	6.2207e-22	104980048	105720733	288	49	12	rs1163081;rs10883903;rs2047036;rs11191835;rs6584579;rs2902637;rs4918073;rs61861151;rs35168839;rs7073079;rs78264314;rs35691152	5	rs1163081;rs10883903;rs11191835;rs4918073;rs35168839	intergenic	0.775	6	RPEL1, INA, PCGF6, TAF5, ATP5MK, PDCD11, SH3PXD2A, STN1, SLK	WBP1L, CNNM2, NT5C2, INA, ATP5MK, PDCD11, CALHM2, NEURL1, SH3PXD2A, STN1, SLK, COL17A1, SFR1	0.9785	6.3e-23	yes	rs9419958	10	105464082	106328016	1.0355	1.16e-10	yes	rs2067831	10	105608838	105720733	9.9456e-09	2.69152e-160	0.999173	0.00082715	rs1265164	0.463741
LTL-CAD	34	11:197337:A:G	rs3802984	11p15.5	11	197337	4.20482e-09	197337	225256	6	3	2	rs3802984;rs10081	1	rs3802984	exonic	1.655	2b	BET1L, SCGB1C1, CIMAP1A, RIC8A, SIRT3	BET1L, SCGB1C1, SIRT3, PSMD13, PGGHG, IFITM2	0.9772	8.4e-23	yes	rs939916	11	176442	270514	1.0159	0.007872	no					0.125195	6.60588e-22	0.760069	0.114737	rs939916	1
LTL-CAD	35	11:9627663:A:G	rs10770044	11p15.4	11	9627663	1.95754e-08	9619155	9819390	77	3	2	rs10770044;rs12807967	1	rs10770044	upstream	2.336	5	WEE1, SWAP70, SBF2	SWAP70	1.0123	1.1e-07	yes	rs10840270	11	9559222	9707150	1.021	0.0002757	yes	rs360153	11	9160766	10311337	1.67414e-08	5.71878e-05	0.999942	4.61048e-07	rs360153	0.230376
LTL-CAD	36	11:103618963:A:G	rs7952476	11q22.3	11	103618963	4.38302e-10	103495588	103761178	130	27	3	rs7952476;rs11225975;rs1601072	1	rs7952476	ncRNA_intronic	1.54	7	#N/A	PDGFD	1.0069	0.00087	no					1.0364	2.765e-12	yes	rs2839812	11	103499104	103763638	1.81768e-28	0.964929	0.0328274	0.00224349	rs2839812	0.483356
LTL-CAD	37	11:108010159:A:C	rs35422249	11p22.3	11	108010159	2.10918e-08	107865164	108016014	28	1	1	rs35422249	1	rs35422249	intronic	4.84	6	CUL5, ACAT1	ACAT1, NPAT, ATM, POGLUT3	1.0202	9.3e-18	yes	rs611646	11	107844790	108439087	1.0119	0.03648	no					0.967355	5.74811e-68	0.025952	0.00669279	rs611646	0.241016
LTL-CAD	38	11:116648917:C:G	rs964184	11q23.3	11	116648917	1.48001e-15	116606766	116991093	26	19	4	rs964184;rs11604424;rs662799;rs12366015	1	rs964184	UTR3	0.203	1f	BUD13, ZPR1, APOA5, SIK3	ZPR1, SIK3, SIDT2, TAGLN, PCSK7	1.0131	7.7e-06	no					1.06	4.409e-17	yes	rs964184	11	116581259	116667083	1.32534e-11	0.0273392	0.0926543	0.880006	rs964184	0.99982
LTL-CAD	39	12:54599266:A:C	rs78712266	12q13.13	12	54599266	3.83233e-09	54596827	54749193	40	6	2	rs78712266;rs1056010	1	rs78712266	intergenic	3.157	5	CBX5, HNRNPA1, NFE2, COPZ1, GPR84	SMUG1, CBX5, GPR84, GTSF1	1.023	1.7e-12	yes	rs79755767	12	54596827	54749193	0.9714	0.000436	no					6.93637e-11	2.38721e-09	1	1.90551e-11	rs79755767	0.30117
LTL-CAD	40	12:112059557:C:T	rs11065979	12q24.12	12	112059557	1.3555e-21	111359712	113018479	1183	700	15	rs11065979;rs4766897;rs2238151;rs77215829;rs6489834;rs11065822;rs4766566;rs1265564;rs7398796;rs4375492;rs648997;rs642536;rs7965087;rs59036878;rs6490037	2	rs11065979;rs7965087	intergenic	3.379	5	MYL2, CUX2, PHETA1, SH2B3, ATXN2, BRAP, ACAD10, ALDH2, MAPKAPK5, TMEM116, ERP29, NAA25, TRAFD1, HECTD4, RPL6, PTPN11, RPH3A	GPN3, HVCN1, MYL2, PHETA1, SH2B3, ACAD10, ALDH2, MAPKAPK5, TMEM116, ERP29, NAA25, TRAFD1, HECTD4	0.987	1.8e-10	yes	rs10774625	12	111818487	112939853	1.0521	1.147e-22	yes	rs10774625	12	111359712	113200293	1.13436e-24	2.03055e-11	0.00183477	0.998165	rs10774625	0.571963
LTL-CAD	41	12:120904895:C:T	rs76666449	12q24.31	12	120904895	1.59351e-11	120843553	121471337	152	74	2	rs76666449;rs1169284	2	rs76666449;rs1169284	intronic	4.896	5	COX6A1, TRIAP1, GATC, SRSF9, DYNLL1, COQ5, RNF10, POP5, HNF1A, C12orf43, OASL	GATC, COQ5, RNF10, POP5, UNC119B, SPPL3, C12orf43, OASL, P2RX4, CAMKK2	1.03	8.2e-19	yes	rs76666449	12	120839217	121090195	0.9703	0.0002447	yes	rs2244608	12	121220375	121489586	1.46477e-12	9.14907e-13	1	2.71562e-12	rs76666449	0.299342
LTL-CAD	42	12:123063912:A:G	rs7316149	12q24.31	12	123063912	2.85264e-08	122810925	123144293	172	6	1	rs7316149	1	rs7316149	intronic	1.031	7	CLIP1, ZCCHC8, RSRC2, KNTC1, HCAR1	CLIP1, ZCCHC8, RSRC2, KNTC1, HCAR1	1.0164	1.1e-12	yes	rs1615350	12	122803643	123932679	0.9823	0.001696	no					0.953529	1.33033e-10	0.0409864	0.00548468	rs10773302	0.0417147
LTL-CAD	43	13:41721305:C:T	rs1819481	13q14.11	13	41721305	3.78708e-11	41693593	41772319	20	15	1	rs1819481	1	rs1819481	intergenic	0.124	NA	KBTBD6, KBTBD7	KBTBD6, KBTBD7	0.9747	1.2e-20	yes	rs1332941	13	41691236	41772319	1.0227	0.0006793	no					0.301072	6.65083e-15	0.506998	0.19193	rs1332941	0.219119
LTL-CAD	44	14:65542477:A:G	rs4902358	14q23.3	14	65542477	9.49773e-10	65475010	65619174	145	47	1	rs4902358	1	rs4902358	UTR3	4.572	5	FNTB, MAX	CHURC1, FNTB, RAB15, MAX	0.9805	7.3e-21	yes	rs45604339	14	64846224	65628009	1.0154	0.003135	no					0.853558	7.79346e-17	0.0514318	0.09501	rs45604339	0.373311
LTL-CAD	45	14:73601390:A:G	rs1800840	14q24.2	14	73601390	2.19637e-10	73294544	73710417	30	8	3	rs59084020;rs1800840;rs79252115	2	rs59084020;rs1800840	intergenic	1.672	7	DPF3, ZFYVE1, RBM25, PSEN1, PAPLN	DPF3, DCAF4, PSEN1, ACOT4	1.0239	1.3e-21	yes	rs3815460	14	73183749	74217790	0.9814	0.001931	no					0.636274	2.97731e-37	0.359223	0.00450343	rs3815460	0.169474
LTL-CAD	46	15:41809205:A:G	rs11070332	15q15.1	15	41809205	2.34348e-08	41801081	41836645	30	2	1	rs11070332	1	rs11070332	downstream	0.526	7	ITPKA, LTK, RPAP1	NDUFAF1, LTK, RPAP1, TYRO3, MAPKBP1, PLA2G4B, JMJD7, SPTBN5, EHD4	1.0132	6e-10	yes	rs17677991	15	41798762	42214769	1.0159	0.002305	no					0.0378173	1.27936e-19	0.962084	9.90738e-05	rs17677991	0.23268
LTL-CAD	47	15:50435071:A:G	rs35507379	15q21.2	15	50435071	8.05867e-10	50363583	50527201	30	1	1	rs35507379	1	rs35507379	intronic	0.815	5	ATP8B4, SLC27A2, HDC	ATP8B4	0.9783	1.5e-19	yes	rs41362650	15	50195949	50797021	0.9858	0.01708	no					0.928023	9.57044e-40	0.0683422	0.00363433	rs12903325	0.27551
LTL-CAD	48	15:74274948:G:T	rs7174985	15q24.1	15	74274948	1.31867e-09	74247784	74353923	69	9	3	rs7174985;rs12917449;rs8024467	1	rs7174985	downstream	0.507	2b	LOXL1, STOML1, PML, GOLGA6A	LOXL1, STOML1, PML	0.9886	7.7e-08	yes	rs5742915	15	74248477	74354152	1.0252	1.653e-06	no					0.0948303	1.6799e-14	0.904502	0.000667349	rs5742915	0.999869
LTL-CAD	49	15:79065171:A:C	rs3743063	15q25.1	15	79065171	1.39484e-11	78942349	79105381	221	50	3	rs3743063;rs2277549;rs12438008	1	rs3743063	intronic	0.161	NA	CHRNB4, ADAMTS7, MORF4L1	IREB2, PSMA4, CHRNA5, ADAMTS7, MORF4L1, CTSH	0.9945	0.0077	no					0.9499	1.71e-22	yes	rs7173743	15	78941119	79215568	1.49144e-37	0.315866	0.682094	0.00203958	rs7173743	0.878829
LTL-CAD	50	15:91426560:A:G	rs4702	15q26.1	15	91426560	4.72955e-13	91416550	91429042	10	1	1	rs4702	1	rs4702	UTR3	17.36	5	FURIN, FES	FURIN, FES	0.9928	0.00038	no					0.9558	6.221e-18	yes	rs7183988	15	91391250	91443059	1.21107e-28	0.968196	0.0207264	0.0110771	rs7183988	0.348832
LTL-CAD	51	16:69967732:A:G	rs8047818	16q22.1	16	69967732	6.78929e-10	69945261	70112729	160	29	1	rs8047818	1	rs8047818	intronic	2.689	5	WWP2, CLEC18A	NOB1, WWP2, CLEC18A, EXOSC6, COG4	1.0161	2.1e-12	yes	rs3785074	16	69086332	70646213	0.9789	0.0001232	no					0.0925701	8.38651e-18	0.906671	0.000758605	rs35676543	0.120761
LTL-CAD	52	16:74592483:C:T	rs7359422	16q23.1	16	74592483	3.99208e-09	74592483	74592483	1	1	1	rs7359422	1	rs7359422	intronic	10.83	7	GLG1	GLG1, RFWD3	0.9787	1.7e-19	yes	rs11866592	16	74198061	74740249	0.9869	0.02934	no					0.94938	7.82434e-29	0.03364	0.01698	rs11866592	0.256045
LTL-CAD	53	16:75456423:C:G	rs11648176	16q23.1	16	75456423	1.69036e-16	75304497	75519917	434	292	4	rs11648176;rs37606;rs999674;rs11645691	1	rs11648176	intronic	1.248	5	BCAR1, CFDP1, TMEM170A, CHST6	ZFP1, CTRB1, BCAR1, CFDP1, TMEM170A	0.9913	1.8e-05	no					0.9547	1.894e-20	yes	rs8046696	16	75232528	75519917	3.6184e-16	0.0944426	0.142713	0.762844	rs8046696	0.0388356
LTL-CAD	54	16:88004203:G:T	rs8057774	16q24.2	16	88004203	3.11296e-10	87984597	88119455	179	37	4	rs8057774;rs4843786;rs7186339;rs12928288	2	rs8057774;rs4843786	intronic	7.092	6	BANP	#N/A	0.9829	4e-12	yes	rs11117354	16	87974570	88202519	1.0243	5.668e-05	no					0.610239	6.33539e-20	0.38706	0.0027016	rs11117354	0.2891
LTL-CAD	55	17:2092200:A:G	rs903162	17p13.3	17	2092200	1.79096e-11	1661829	2211343	211	27	4	rs17821469;rs903162;rs10852923;rs216195	3	rs17821469;rs903162;rs216195	intronic	4.124	6	SERPINF2, SERPINF1, SMYD4, SMG6, SRR	WDR81, SERPINF1, SMYD4, RPA1, SMG6, SRR, SGSM2	1.0066	0.0022	yes	rs7218033	17	1660801	2584946	1.0457	6.971e-18	yes	rs4790881	17	1958536	2585113	1.99534e-13	3.02826e-16	1	8.41823e-16	rs7218033	0.341417
LTL-CAD	56	17:41458020:A:G	rs8072193	17q21.31	17	41458020	9.37914e-17	41085683	41459600	648	420	5	rs150935822;rs8072193;rs62076368;rs138572696;rs35017602	2	rs150935822;rs8072193	ncRNA_intronic	0.412	4	AARSD1, PTGES3L, RUNDC1, RPL27, IFI35, VAT1, RND2, BRCA1, NBR1, TMEM106A	DHX58, TUBG2, AARSD1, RUNDC1, RPL27, IFI35, VAT1, RND2, BRCA1, NBR1, TMEM106A, ARL4D, MEOX1	0.9748	1.1e-21	yes	rs12941945	17	41085683	41469457	1.0338	5.057e-07	no					0.00167649	2.47677e-17	0.0280175	0.970306	rs12941945	0.227932
LTL-CAD	57	17:73904155:A:G	rs113789309	17q25.1	17	73904155	1.94151e-09	73784214	73953404	119	23	2	rs113789309;rs2410859	1	rs113789309	intronic	0.014	6	H3-3B, UNK, UNC13D, WBP2, TRIM47, TRIM65, MRPL38, FBF1, ACOX1	GRB2, GALK1, UNK, UNC13D, WBP2, TRIM47, TRIM65, MRPL38, FBF1, ACOX1, TEN1, CDK3	1.0132	4e-08	yes	rs2069536	17	73826406	74025656	0.9732	4.218e-06	yes	rs2410859	17	73784214	73952993	0.00210342	0.000322414	0.995089	0.00248418	rs113789309	0.133855
LTL-CAD	58	18:42208390:C:G	rs12606258	18q12.3	18	42208390	1.4573e-09	42120988	42217290	69	40	1	rs12606258	1	rs12606258	intergenic	0.177	5	#N/A	#N/A	0.9756	2.3e-19	yes	rs8088824	18	41816365	42299345	0.9842	0.02023	no					0.951887	1.11814e-22	0.0368298	0.0112827	rs8088824	0.141897
LTL-CAD	59	18:51783831:A:G	rs655991	18q21.2	18	51783831	1.04603e-09	51777727	51947417	152	99	2	rs655991;rs17470798	1	rs655991	intergenic	1.942	5	POLI, STARD6, C18orf54	POLI, C18orf54	0.9833	3.6e-14	yes	rs2276182	18	51640653	52468402	1.0192	0.0004367	no					0.86953	4.72543e-25	0.127455	0.00301538	rs2276182	0.0896339
LTL-CAD	60	18:74660201:C:T	rs470905	18q23	18	74660201	5.45887e-09	74540078	74694985	38	11	1	rs470905	1	rs470905	intronic	7.444	5	ZNF236, MBP	ZNF236	1.0124	1.6e-09	yes	rs6565924	18	74619652	74697894	0.9803	6.728e-05	no					0.283841	6.11662e-05	0.10967	0.606271	rs470469	0.150076
LTL-CAD	61	19:8516677:A:T	rs11259985	19p13.2	19	8516677	3.91542e-08	8484632	8559520	42	4	1	rs11259985	1	rs11259985	intronic	3.486	5	MARCHF2, HNRNPM, PRAM1	MARCHF2, PRAM1	0.9903	6e-06	no					1.0255	2.452e-06	yes	rs116843064	19	8429323	8621380	3.60559e-15	0.461831	0.535732	0.0024371	rs116843064	1
LTL-CAD	62	19:41826020:A:C	rs56254331	19q13.2	19	41826020	1.05485e-11	41731175	41866273	48	13	3	rs56254331;rs12459996;rs4803455	2	rs56254331;rs4803455	intronic	6.856	4	AXL, HNRNPUL1, TGFB1, CCDC97, TMEM91, B9D2	CYP2A6, TGFB1, CCDC97, TMEM91, B9D2, BCKDHA, EXOSC5, ERICH4	1.0079	0.0037	no					1.0659	3.901e-20	yes	rs56254331	19	41731175	41946095	1.10493e-15	0.905598	0.0132765	0.0811256	rs56254331	0.612354
LTL-CAD	63	19:45319631:A:G	rs118147862	19q13.32	19	45319631	1.86005e-17	45223276	45653883	61	17	9	rs118147862;rs12721109;rs62117161;rs148933445;rs34095326;rs6859;rs157581;rs61679753;rs28399657	3	rs118147862;rs34095326;rs61679753	intronic	9.825	5	CEACAM16, BCL3, CBLC, BCAM, NECTIN2, TOMM40, APOE, APOC4, APOC2, MARK4, PPP1R37, NKPD1	NECTIN2	0.9788	2e-05	yes	rs429358	19	45392254	45424351	0.8685	5.715e-23	yes	rs7412	19	45232161	46374916	1.61393e-48	0.000581471	0.290034	0.709385	rs7412	1
LTL-CAD	64	20:33288655:A:G	rs6058108	20q11.22	20	33288655	6.80215e-09	32903904	33529766	133	9	1	rs6058108	1	rs6058108	intergenic	4.159	1f	AHCY, ITCH, DYNLRB1, MAP1LC3A, PIGU, NCOA6, TP53INP2, GGT7, ACSS2, GSS	ITCH, DYNLRB1, MAP1LC3A, PIGU, NCOA6, TP53INP2, GGT7, MYH7B, TRPC4AP, EDEM2, PROCR, UQCC1	1.0075	0.00028	no					1.0286	1.792e-08	yes	rs6088595	20	32903904	33880146	1.97446e-05	0.313089	0.672033	0.0148494	rs6088595	0.130897
LTL-CAD	65	20:62559964:A:G	rs817362	20q13.33	20	62559964	6.45221e-14	62196807	62565646	161	16	8	rs310632;rs310664;rs6062473;rs75667187;rs5019252;rs73622887;rs4809370;rs817362	7	rs310632;rs6062473;rs75667187;rs5019252;rs73622887;rs4809370;rs817362	intronic	0.074	5	FNDC11, HELZ2, GMEB2, STMN3, RTEL1, TNFRSF6B, ARFRP1, ZGPAT, LIME1, SLC2A4RG, ZBTB46, TPD52L2, DNAJC5, UCKL1	GMEB2, STMN3, RTEL1, TNFRSF6B, ARFRP1, LIME1, SLC2A4RG, ZBTB46, TPD52L2, PRPF6, TCEA2, RGS19, OPRL1	1.0308	4.5e-20	yes	rs35640778	20	61726373	62811392	0.963	1.6e-05	no					0.431738	8.94893e-188	0.509062	0.0592003	rs35640778	1
LTL-VTE	1	1:32280610:C:T	rs6664445	1p35.2	1	32280610	7.83912e-10	32267747	32314400	53	22	3	rs6664445;rs34590201;rs34572877	1	rs6664445	exonic	1.163	2b	SPOCD1	SPOCD1	0.984	9.2e-14	yes	rs6669563	1	32267747	32315551	0.9824	0.002177	no					0.953119	2.60781e-14	0.0265467	0.0203343	rs6669563	0.424983
LTL-VTE	2	1:78450517:A:C	rs34517439	1p31.1	1	78450517	9.34901e-12	77945635	78450517	39	12	3	rs34517439;rs3104464;rs35535570	1	rs34517439	intronic	8.996	6	AK5, ZZZ3, MIGA1, NEXN, FUBP1, DNAJB4, GIPC2	NEXN, FUBP1	1.0168	1.3e-07	no					1.0449	7.218e-08	no					0.000198663	0.000915073	0.00197124	0.996854	rs34517439	0.709667
LTL-VTE	3	1:168674370:A:G	rs494317	1q24.2	1	168674370	3.22221e-08	168664450	168675971	10	5	1	rs494317	1	rs494317	intronic	0.616	6	DPT	#N/A	0.9945	0.007	no					1.0422	3.433e-14	yes	rs6427196	1	168370260	170491775	0	0.982419	0.0131918	0.00438964	rs144737447	1
LTL-VTE	4	1:169577990:A:G	rs3917744	1q24.2	1	169577990	3.04923e-09	169462911	169577990	4	2	2	rs10800449;rs3917744	2	rs10800449;rs3917744	intronic	1.379	6	SLC19A2, SELP	F5, SELL	1.0068	0.0045	no					1.0601	7.369e-14	yes	rs6427196	1	168370260	170491775	0	0.984161	0.0113595	0.00447917	rs6025	1
LTL-VTE	5	1:226669292:C:T	rs10753426	1q42.12	1	226669292	6.81949e-09	226613126	226702300	23	1	1	rs10753426	1	rs10753426	intergenic	0.572	3a	#N/A	PARP1	0.9765	4e-22	yes	rs932002	1	226536645	226741284	0.9868	0.03975	no					0.83971	3.29823e-41	0.156824	0.00346651	rs932002	0.218972
LTL-VTE	6	1:248039451:C:T	rs3811444	1q44	1	248039451	3.28271e-14	248038210	248041821	3	3	1	rs3811444	1	rs3811444	exonic	17.25	4	TRIM58, OR2W3	OR2W3	0.9887	9e-08	no					0.9637	5.728e-11	yes	rs3811444	1	248038210	248041821	2.75758e-07	0.00059024	9.39802e-05	0.999315	rs3811444	0.999865
LTL-VTE	7	2:54010876:A:C	rs80051433	2p16.2	2	54010876	2.68269e-09	53955982	54519443	18	5	1	rs80051433	1	rs80051433	intronic	2.804	7	ASB3, CHAC2, ERLEC1, PSME4, ACYP2, TSPYL6	SPTBN1	1.0324	8.5e-14	yes	rs965109	2	53704374	54820213	1.0345	0.003931	no					0.922354	2.12469e-50	0.0618991	0.0157471	rs62139200	0.26407
LTL-VTE	8	2:68587477:C:T	rs7595717	2p14	2	68587477	6.43797e-09	68578358	68646279	61	11	1	rs7595717	1	rs7595717	downstream	4.226	7	PLEK	CNRIP1, PLEK	1.0094	3.6e-05	no					0.9677	9.078e-08	yes	rs1867312	2	68577734	68660965	1.6256e-13	0.850207	0.147146	0.00264705	rs1867312	0.967819
LTL-VTE	9	3:49924424:A:G	rs11713193	3p21.31	3	49924424	1.28798e-09	49734229	50250837	308	38	2	rs11713193;rs3774750	1	rs11713193	downstream	7.191	5	MST1, RNF123, AMIGO3, GMPPB, IP6K1, CDHR4, INKA1, UBA7, TRAIP, CAMKV, MST1R, MON1A, RBM6, RBM5, SEMA3F, GNAT1	WDR6, AMT, NICN1, BSN, APEH, MST1, RNF123, GMPPB, IP6K1, CDHR4, INKA1, UBA7, MST1R, MON1A, RBM6, RBM5, SEMA3F, GNAI2, IFRD2, HYAL3, NAA80, HYAL1, RASSF1, CYB561D2, CACNA2D2, C3orf18, HEMK1, DOCK3	0.9845	7.6e-15	yes	rs7634084	3	49385350	50250837	1.0168	0.001803	no					0.744569	2.14954e-10	0.0514129	0.204018	rs7634084	0.132279
LTL-VTE	10	3:72777558:A:C	rs138477976	3p13	3	72777558	3.86101e-09	72777558	72924570	5	1	1	rs138477976	1	rs138477976	intergenic	8.115	4	SHQ1	#N/A	0.9242	6.1e-19	yes	rs138477976	3	72777558	72924570	1.0547	0.008321	no					0.444278	6.95505e-13	0.415651	0.14007	rs138477976	1
LTL-VTE	11	3:128210342:A:C	rs1986452	3q21.3	3	128210342	2.08643e-10	128197282	128320586	42	21	4	rs1986452;rs6776756;rs2713575;rs62273237	2	rs1986452;rs2713575	ncRNA_intronic	9.132	4	GATA2	RPN1, ACAD9	0.984	1.2e-15	yes	rs6776756	3	128197282	128425253	0.9844	0.01797	no					0.824966	5.46084e-12	0.0476551	0.127379	rs6776756	0.901817
LTL-VTE	12	3:138496809:A:T	rs388649	3q22.3	3	138496809	4.30743e-10	138154174	138646976	489	178	3	rs388649;rs9857349;rs4678418	1	rs388649	ncRNA_exonic	6.412	7	ESYT3, CEP70, FAIM, PIK3CB	MRAS, ESYT3, CEP70, FAIM, PIK3CB	1.0127	3.6e-10	yes	rs9878436	3	138133682	138640704	0.9782	5.112e-05	no					0.482717	4.33596e-08	0.166355	0.350928	rs1068685	0.0302485
LTL-VTE	13	3:156798473:A:C	rs1482853	3q25.31	3	156798473	7.59378e-09	156791268	156798775	17	13	1	rs1482853	1	rs1482853	downstream	12.24	5	#N/A	TIPARP	0.9936	0.0018	no					0.9647	8.664e-11	yes	rs9854955	3	156791268	156798775	1.07457e-07	0.929646	0.0247615	0.0455883	rs10049090	0.15393
LTL-VTE	14	3:160086055:G:T	rs10513551	3q25.33	3	160086055	1.39165e-10	160004026	160309529	158	36	1	rs10513551	1	rs10513551	intronic	4.527	NA	IFT80, SMC4, TRIM59, KPNA4	SCHIP1, SMC4, TRIM59, KPNA4	1.0174	6.8e-18	yes	rs73154592	3	159922979	160401080	1.0161	0.004548	no					0.927894	4.2876e-14	0.0253256	0.0467804	rs10513551	0.073765
LTL-VTE	15	3:169478902:C:T	rs143005085	3q26.2	3	169478902	4.64451e-09	169292644	169478902	3	1	1	rs143005085	1	rs143005085	intergenic	6.25	7	MECOM, ACTRT3	#N/A	0.9216	4.3e-23	yes	rs12638862	3	169182961	170281322	0.9527	0.04172	no					0.860139	0	0.136021	0.00384064	rs2293607	0.893908
LTL-VTE	16	4:48483416:A:G	rs6447640	4p11	4	48483416	2.90716e-08	48435097	48879374	225	6	1	rs6447640	1	rs6447640	intergenic	0.057	7	SLAIN2, SLC10A4, ZAR1, FRYL, OCIAD1, OCIAD2	NFXL1, TEC, SLAIN2, SLC10A4, OCIAD1, CWH43	1.013	1.1e-10	yes	rs4695407	4	48466781	48925948	1.0159	0.003206	no					0.829177	8.10976e-08	0.152958	0.0178648	rs4695407	0.0591301
LTL-VTE	17	4:187240280:A:T	rs13137269	4q35.2	4	187240280	2.18427e-09	187239747	187243224	6	2	2	rs13137269;rs7687352	1	rs13137269	ncRNA_intronic	3.318	6	#N/A	#N/A	0.9942	0.0053	no					0.9575	6.991e-15	yes	rs2289252	4	186947231	187524525	3.80917e-193	0.977757	0.0212404	0.00100212	rs2289252	0.500454
LTL-VTE	18	5:1632266:C:T	rs6891307	5p15.33	5	1632266	4.90475e-10	1289369	1639658	151	38	2	rs34768248;rs6891307	2	rs34768248;rs6891307	ncRNA_intronic	2.995	5	TERT, CLPTM1L	#N/A	1.0191	5.6e-13	yes	rs7705526	5	1100831	1679863	1.0234	0.001141	no					0.926792	7.682e-276	0.0702548	0.00295348	rs7705526	1
LTL-VTE	19	5:132444128:A:G	rs72801474	5q31.1	5	132444128	5.58796e-18	132349654	132467373	125	93	3	rs72801474;rs72801480;rs72801445	1	rs72801474	intergenic	0.703	5	ZCCHC10, HSPA4	SHROOM1, HSPA4	0.9795	3.9e-09	yes	rs72801474	5	132349654	132467373	0.953	5.527e-05	yes	rs55747751	5	132349654	132466540	6.85197e-11	3.0047e-05	0.00124506	0.998725	rs72801474	0.737371
LTL-VTE	20	5:133864599:A:G	rs329122	5q31.1	5	133864599	1.6566e-08	133831478	133865452	7	4	1	rs329122	1	rs329122	intronic	7.338	5	JADE2	#N/A	1.0094	3.6e-06	no					0.9758	7.032e-06	no					0.0339053	0.0283223	0.0103726	0.841771	rs329122	0.375863
LTL-VTE	21	6:25862466:C:T	rs1165165	6p22.2	6	25862466	6.84172e-13	25414537	29607101	1783	540	27	rs2328887;rs34164888;rs212934;rs4236040;rs2328893;rs1165168;rs17587226;rs1935234;rs34661691;rs9467713;rs6921589;rs214060;rs1165165;rs6918586;rs198818;rs4645;rs4413606;rs7749305;rs6456814;rs880638;rs1233578;rs3129789;rs9257593;rs3117439;rs1555244;rs5003267;rs3094548	6	rs2328887;rs214060;rs1165165;rs4645;rs7749305;rs880638	exonic	10.42	NA	CARMIL1, SCGN, SLC17A4, SLC17A1, SLC17A3, SLC17A2, TRIM38, H1-1, H4C2, H1-2, HFE, H4C3, H1-6, H2BC4, H2AC6, H1-4, H2BC5, H3C4, H2AC7, H1-3, H4C8, BTN3A1, BTN3A3, BTN2A1, BTN1A1, HMGN4, ABT1, ZNF322, H2BC11, H2AC11, POM121L2, ZNF391, ZNF184, H2BC13, H2AC13, H4C11, H2BC15, H1-5, H3C12, OR2B2, OR2B6, ZNF165, ZSCAN16, ZKSCAN8, ZSCAN9, ZKSCAN4, NKAPL, PGBD1, ZSCAN31, ZKSCAN3, ZSCAN12, ZSCAN23, GPX6, S…	CARMIL1, SCGN, SLC17A1, SLC17A3, TRIM38, HFE, H1-6, H2AC6, H2BC5, H4C8, BTN3A2, BTN2A2, BTN2A1, HMGN4, ZNF322, H2BC11, H2BC12, PRSS16, ZNF391, H2BC15, ZNF165, ZSCAN16, ZKSCAN8, ZSCAN9, ZKSCAN4, PGBD1, ZSCAN31, ZKSCAN3, ZSCAN12, ZSCAN23, SCAND3, TRIM27, ZNF311, GABBR1, OR2H2	0.9841	6.8e-12	yes	rs13198474	6	24988105	29612325	0.9709	5.457e-06	yes	rs214060	6	25525120	26124634	1.36864e-08	1.07644e-13	1	3.62707e-09	rs13198474	0.135725
LTL-VTE	22	7:128572766:A:G	rs4731532	7q32.1	7	128572766	6.08787e-09	128567032	128580048	12	4	1	rs4731532	1	rs4731532	intergenic	1.286	4	IRF5	IRF5	1.0188	1.2e-20	yes	rs3757387	7	128562578	128710988	0.987	0.01426	no					0.920877	6.34302e-19	0.0547187	0.0244041	rs3757387	0.272906
LTL-VTE	23	9:826585:C:G	rs4742448	9p24.3	9	826585	1.86636e-09	809598	863864	58	2	2	rs4742448;rs13295838	1	rs4742448	intergenic	0.651	3a	DMRT1	#N/A	1.0156	6.4e-14	yes	rs4742448	9	809598	863864	1.017	0.003351	no					0.785627	3.3483e-08	0.0561011	0.158272	rs4742448	0.996961
LTL-VTE	24	9:34028501:C:T	rs2016791	9p13.3	9	34028501	3.45174e-08	33773705	34078582	70	4	1	rs2016791	1	rs2016791	intronic	3.377	NA	PRSS3, UBE2R2, UBAP2, DCAF12	DNAJA1, NUDT2	0.9833	4.1e-14	yes	rs11557154	9	33758674	34149119	1.0164	0.007126	no					0.958509	1.86116e-25	0.0300119	0.0114792	rs11557154	0.559324
LTL-VTE	25	9:136106974:A:G	rs71503180	9q34.2	9	136106974	7.64311e-11	136106974	136339959	95	14	5	rs71503180;rs62574647;rs62574658;rs491105;rs1054379	3	rs71503180;rs62574647;rs1054379	intergenic	1.964	5	SURF6, MED22, RPL7A, SURF1, SURF2, SURF4, STKLD1, REXO4, ADAMTS13, CACFD1, SLC2A6	CEL, SURF6, MED22, SURF1, REXO4, ADAMTS13, CACFD1, SLC2A6	1.0117	0.0015	no					0.9047	6.15e-19	yes	rs579459	9	135866940	136400566	0	0.0879283	0.911691	0.000380438	rs635634	1
LTL-VTE	26	10:71272018:C:T	rs972570	10q22.1	10	71272018	9.28164e-11	71256076	71289190	36	8	1	rs972570	1	rs972570	intergenic	5.372	6	TSPAN15	TSPAN15	0.9942	0.0038	no					0.9543	3.237e-18	yes	rs78707713	10	71145819	71302731	1.07831e-93	0.979981	0.0182401	0.00177876	rs78707713	0.9293
LTL-VTE	27	10:95996336:C:T	rs10882412	10q23.33	10	95996336	1.67736e-10	95971321	96382128	248	24	3	rs10882412;rs7069316;rs7895305	1	rs10882412	intronic	0.201	6	PLCE1, NOC3L, TBC1D12, HELLS	PLCE1, NOC3L, HELLS, CYP2C19, CYP2C8, ACSM6	0.9887	4.2e-08	yes	rs12572897	10	95958289	96757047	1.0276	1.368e-06	yes	rs7069316	10	95971321	96129098	0.00457282	2.0592e-20	0.995378	4.93592e-05	rs12572897	0.579188
LTL-VTE	28	10:106151444:C:T	rs17116984	10q25.1	10	106151444	6.97936e-09	106144987	106152899	5	1	1	rs17116984	1	rs17116984	intronic	1.682	2b	CFAP58	#N/A	1.0601	4.9e-12	yes	rs9419958	10	105464082	106328016	0.8981	0.00284	no					0.971893	6.2789e-162	0.0233044	0.00480245	rs9419958	0.408554
LTL-VTE	29	11:46911704:C:T	rs2306036	11p11.2	11	46911704	3.9178e-16	46304187	51438422	573	198	14	rs10838596;rs2306036;rs326224;rs10838681;rs11570051;rs3740684;rs34312154;rs142892685;rs7111517;rs77682558;rs3740688;rs10769315;rs34884378;rs77893012	6	rs10838596;rs2306036;rs77682558;rs3740688;rs10769315;rs77893012	intronic	1.746	1f	CREB3L1, DGKZ, MDK, AMBRA1, HARBI1, ATG13, ARHGAP1, ZNF408, F2, CKAP5, LRP4, CSTPP1, ARFGAP2, DDB2, ACP2, NR1H3, MADD, MYBPC3, SPI1, SLC39A13, PSMC3, RAPSN, CELF1, NDUFS3, PTPMT1, KBTBD4, FAM180B, C1QTNF4, MTCH2, AGBL2, FNBP4, NUP160, PTPRJ, OR4B1, OR4X2, OR4S1, TRIM64C	MDK, ATG13, ARHGAP1, ZNF408, F2, LRP4, CSTPP1, PACSIN3, DDB2, ACP2, NR1H3, MADD, MYBPC3, SLC39A13, PSMC3, RAPSN, CELF1, NDUFS3, PTPMT1, C1QTNF4, AGBL2, NUP160, PTPRJ, FOLH1	1.0126	4.8e-06	yes	rs2293579	11	47377283	47883337	1.0633	8.202e-18	yes	rs141325867	11	46304187	50538301	2.04276e-34	0.00714882	0.992828	2.33528e-05	rs78807356	0.999999
LTL-VTE	30	11:56119093:C:T	rs4619163	11q12.1	11	56119093	3.62133e-10	55108959	56441060	12	9	2	rs117350740;rs4619163	2	rs117350740;rs4619163	intergenic	11.65	6	OR4A16, OR4C11, OR10AG1, OR5F1, OR5T3, OR8K1, OR8J1, OR5AR1	#N/A	1.0141	0.0011	no					1.0791	2.391e-13	yes	rs141798115	11	54857825	57110206	2.345e-09	0.887475	0.0295118	0.0830132	rs4619163	0.737402
LTL-VTE	31	11:61604782:A:T	rs2524299	11q12.2	11	61604782	2.66921e-08	61573540	61616012	14	1	1	rs2524299	1	rs2524299	intronic	1.311	5	FEN1, FADS2, FADS1	TMEM258, FADS1, FADS3	1.0088	0.0041	no					0.9458	3.71e-13	yes	rs174566	11	61539020	61658800	4.93739e-16	0.97489	0.0233742	0.00173595	rs174566	0.089631
LTL-VTE	32	11:116648917:C:G	rs964184	11q23.3	11	116648917	1.00691e-08	116623213	116657561	3	2	1	rs964184	1	rs964184	UTR3	0.203	1f	BUD13, ZPR1, APOA5	ZPR1	1.0131	7.7e-06	no					1.06	4.409e-17	no					0.0925409	0.0496101	0.169067	0.661733	rs964184	0.609075
LTL-VTE	33	12:6162661:A:G	rs2239161	12p13.31	12	6162661	9.91095e-10	6136580	6162852	29	3	1	rs2239161	1	rs2239161	intronic	4.743	NA	VWF	#N/A	0.9923	0.017	no					0.9231	1.168e-20	yes	rs7135039	12	6023686	6170645	1.54615e-23	0.982648	0.0160475	0.00130425	rs7135039	0.180679
LTL-VTE	34	12:54649978:C:T	rs79880068	12q13.13	12	54649978	2.50989e-12	54596619	54749193	27	11	4	rs79880068;rs118163918;rs7304860;rs9739357	2	rs79880068;rs7304860	intronic	9.329	6	CBX5, HNRNPA1, NFE2, COPZ1, GPR84	SMUG1, CBX5, HNRNPA1, NFE2, GPR84, GTSF1	1.0264	2.2e-15	yes	rs79755767	12	54596827	54749193	1.0332	0.0001925	yes	rs4759076	12	54596619	54736470	2.67204e-07	2.38721e-09	0.999999	4.68689e-07	rs79755767	0.572157
LTL-VTE	35	12:111910219:A:G	rs10774625	12q24.12	12	111910219	2.86463e-20	111426615	112939853	560	384	8	rs10774625;rs648997;rs4766897;rs12319539;rs11065822;rs1265564;rs4766460;rs11065898	1	rs10774625	intronic	2.748	5	CUX2, SH2B3, ATXN2, BRAP, ACAD10, ALDH2, MAPKAPK5, TMEM116, NAA25, TRAFD1, HECTD4, RPL6, PTPN11	GPN3, PHETA1, SH2B3, ACAD10, ALDH2, MAPKAPK5, TMEM116, NAA25, HECTD4	0.9839	1.7e-15	yes	rs10774625	12	111818487	112939853	1.0561	6.232e-17	yes	rs597808	12	111818487	112906415	2.02138e-08	1.38016e-10	0.0182736	0.981726	rs10774625	0.279802
LTL-VTE	36	12:123783994:C:T	rs12821431	12q24.31	12	123783994	6.26216e-20	122804256	123932679	607	420	9	rs7963773;rs12821431;rs73231956;rs35416759;rs12815479;rs1716183;rs1716162;rs1790099;rs1879379	2	rs7963773;rs12821431	intronic	0.345	7	CLIP1, ZCCHC8, RSRC2, KNTC1, HCAR1, ABCB9, OGFOD2, ARL6IP4, PITPNM2, MPHOSPH9, MTRFR, CDK2AP1, SBNO1, KMT5A, RILPL2, SNRNP35	CLIP1, ZCCHC8, RSRC2, HCAR1, CCDC62, ABCB9, OGFOD2, ARL6IP4, MPHOSPH9, MTRFR, CDK2AP1, SBNO1, KMT5A, RILPL2, SNRNP35, ATP6V0A2	0.9808	9.6e-15	yes	rs1615350	12	122803643	123932679	0.9584	1.53e-10	yes	rs4759420	12	123450765	123913433	6.07647e-06	6.64223e-12	0.829648	0.170346	rs28768122	0.0932369
LTL-VTE	37	14:73429166:C:T	rs8010674	14q24.2	14	73429166	3.67019e-11	73397349	73710696	175	61	3	rs8010674;rs61986507;rs78387414	1	rs8010674	downstream	4.806	5	DCAF4, ZFYVE1, RBM25, PSEN1, PAPLN	DCAF4, ZFYVE1, PSEN1, FAM161B	1.0156	4.4e-14	yes	rs3815460	14	73183749	74217790	0.9789	0.000168	no					0.825024	9.97577e-38	0.120308	0.0546684	rs57097782	0.152521
LTL-VTE	38	14:91925822:C:T	rs17261197	14q32.12	14	91925822	6.55956e-10	91871672	92057960	202	6	2	rs17261197;rs11625774	1	rs17261197	intronic	4.274	6	CCDC88C, PPP4R3A, CATSPERB	CCDC88C	0.9851	2.2e-13	yes	rs8006485	14	91836982	92099719	0.9791	0.00168	no					8.13692e-13	4.36746e-16	1	5.39492e-15	rs11625774	0.0726547
LTL-VTE	39	15:41881190:A:G	rs11070340	15q15.1	15	41881190	9.34795e-13	41804694	42149472	235	112	6	rs11070340;rs7170463;rs34055060;rs4923915;rs11632399;rs12593920	1	rs11070340	intergenic	9.123	7	ITPKA, LTK, RPAP1, TYRO3, MGA, MAPKBP1, PLA2G4B, JMJD7, SPTBN5	VPS18, NUSAP1, NDUFAF1, LTK, RPAP1, TYRO3, MGA, MAPKBP1, PLA2G4B, JMJD7, SPTBN5, EHD4	0.984	1.4e-15	yes	rs17677991	15	41798762	42214769	0.9795	0.0001313	no					0.757742	3.04113e-20	0.228682	0.013576	rs17677991	0.219501
LTL-VTE	40	16:69975631:A:T	rs3192882	16q22.1	16	69975631	1.96464e-10	69128053	70546234	685	91	7	rs8057271;rs4985452;rs2270842;rs3192882;rs3852695;rs62052820;rs72785073	3	rs8057271;rs4985452;rs3192882	UTR3	17.58	2b	TANGO6, HAS3, CHTF8, UTP4, SNTB2, VPS4A, COG8, PDF, NIP7, TMED6, NFAT5, NQO1, NOB1, WWP2, CLEC18A, PDPR, EXOSC6, AARS1, DDX19B, DDX19A, ST3GAL2, FCSK, COG4	UTP4, SNTB2, VPS4A, COG8, PDF, NIP7, TMED6, TERF2, NFAT5, NOB1, WWP2, CLEC18A, PDPR, EXOSC6, DDX19B, DDX19A, COG4, SF3B3, IL34	0.9809	2.1e-20	yes	rs3785074	16	69086332	70646213	1.0162	0.003541	no					0.17818	7.4715e-18	0.807897	0.0139231	rs55936521	0.115546
LTL-VTE	41	16:75455448:A:C	rs11641801	16q23.1	16	75455448	4.12578e-12	75304497	75519917	392	270	3	rs11641801;rs37606;rs999674	1	rs11641801	intronic	10.94	4	BCAR1, CFDP1, TMEM170A, CHST6	ZFP1, CTRB1, BCAR1, CFDP1, TMEM170A	0.9913	1.7e-05	no					1.0401	4.954e-13	yes	rs11649638	16	75304366	75519917	2.06429e-09	0.114764	0.173636	0.7116	rs11644741	0.020868
LTL-VTE	42	17:1966457:C:T	rs1048483	17p13.3	17	1966457	3.39834e-14	1949237	2322776	118	59	7	rs1048483;rs3744274;rs4790874;rs72815304;rs216195;rs216210;rs3744276	2	rs1048483;rs3744276	intronic	17.06	4	DPH1, OVCA2, HIC1, SMG6, SRR, TSR1, MNT, METTL16	RTN4RL1, DPH1, SMG6, SRR, METTL16	1.0081	6.3e-05	yes	rs7218033	17	1660801	2584946	0.9507	6.599e-21	yes	rs1048483	17	1958536	2203167	3.09061e-14	3.02826e-16	1	9.82226e-16	rs1048483	0.876558
LTL-VTE	43	17:7744193:A:C	rs4791840	17p13.1	17	7744193	3.18528e-14	7739215	8164352	104	7	3	rs4791840;rs74439044;rs66582670	2	rs4791840;rs66582670	intronic	6.989	5	DNAH2, KDM6B, TMEM88, NAA38, CYB5D1, CHD3, PER1, VAMP2, TMEM107, BORCS6, AURKB, CTC1, PFAS	KDM6B, NAA38, CHD3, VAMP2, CTC1, SLC25A35	0.9766	6.8e-23	yes	rs4724	17	7724159	8221113	1.0248	0.0001411	yes	rs17807204	17	7731764	7898537	0.00698625	7.51892e-62	0.99298	3.32638e-05	rs4724	0.525243
LTL-VTE	44	17:73996887:C:T	rs3760131	17q25.1	17	73996887	7.31951e-10	73826406	74021369	58	17	2	rs3760131;rs2608882	1	rs3760131	ncRNA_exonic	7.258	NA	UNK, UNC13D, WBP2, TRIM47, TRIM65, MRPL38, FBF1, ACOX1, TEN1, CDK3, EVPL	GRB2, GALK1, UNC13D, WBP2, TRIM47, TRIM65, MRPL38, FBF1, ACOX1, TEN1, CDK3	1.0146	3.8e-10	yes	rs2069536	17	73826406	74025656	1.0247	0.0001967	no					0.461264	3.76043e-05	0.115638	0.42291	rs3760131	0.403595
LTL-VTE	45	18:42197163:C:T	rs9960261	18q12.3	18	42197163	2.6809e-08	42155562	42222364	17	1	1	rs9960261	1	rs9960261	intergenic	1.919	7	#N/A	#N/A	1.0237	8.1e-18	yes	rs8088824	18	41816365	42299345	0.9823	0.01457	no					0.949492	1.33127e-22	0.0438567	0.00665154	rs8088824	0.176693
LTL-VTE	46	19:10813364:C:T	rs4425006	19p13.2	19	10813364	1.36305e-08	10751080	10813364	4	1	1	rs4425006	1	rs4425006	intronic	1.99	5	SLC44A2, ILF3, QTRT1	#N/A	1.0095	0.0079	no					0.9198	2.801e-16	yes	rs2360742	19	10633908	11180047	1.96537e-38	0.947006	0.0517656	0.00122876	rs2360742	0.159966
LTL-VTE	47	19:22469057:A:G	rs452556	19p12	19	22469057	1.25883e-10	22439042	22659822	247	89	2	rs452556;rs12104137	1	rs452556	upstream	0.21	NA	ZNF729, ZNF98	ZNF257, ZNF98	0.9806	2.1e-22	yes	rs8105767	19	22076395	22722254	1.0155	0.004507	no					0.95372	1.84179e-44	0.0427002	0.0035795	rs8105767	0.999743
LTL-VTE	48	19:45412079:C:T	rs7412	19q13.32	19	45412079	1.08642e-12	45392254	45426792	21	3	2	rs429358;rs7412	2	rs429358;rs7412	exonic	25.1	4	NECTIN2, TOMM40, APOE, APOC1	#N/A	0.9811	2.2e-07	yes	rs429358	19	45392254	45424351	1.0647	2.86e-10	yes	rs141622900	19	45369203	45426792	4.60254e-07	0.0019901	0.995074	0.00293568	rs7412	0.923552
LTL-VTE	49	20:33756206:C:T	rs1987165	20q11.22	20	33756206	3.60723e-17	32514061	34026138	1531	658	13	rs2300206;rs73610830;rs6088520;rs6059987;rs73106933;rs1987165;rs6060347;rs2425055;rs6088659;rs6088742;rs6058220;rs116707649;rs73903009	3	rs2300206;rs1987165;rs6058220	intronic	0.547	NA	RALY, EIF2S2, ASIP, AHCY, ITCH, DYNLRB1, MAP1LC3A, PIGU, NCOA6, TP53INP2, GGT7, ACSS2, GSS, MYH7B, TRPC4AP, EDEM2, PROCR, MMP24, EIF6, FAM83C, UQCC1, GDF5	CHMP4B, AHCY, ITCH, DYNLRB1, MAP1LC3A, PIGU, NCOA6, TP53INP2, GGT7, ACSS2, GSS, MYH7B, TRPC4AP, EDEM2, PROCR, MMP24, EIF6, UQCC1, GDF5, CEP250, ERGIC3, CPNE1, NFS1, SCAND1, EPB41L1	0.9909	5.9e-06	no					0.9509	1.87e-20	yes	rs6060308	20	32484835	34597962	3.02862e-53	0.409128	0.571805	0.0190675	rs6060308	0.618494
LTL-VTE	50	20:35562257:C:G	rs62208124	20q11.23	20	35562257	4.43237e-11	35562257	35838591	4	1	1	rs62208124	1	rs62208124	intronic	1.156	6	SAMHD1, RBL1, MROH8, RPN2	NDRG3	0.9448	4.5e-22	yes	rs1291143	20	35072641	35906537	0.9573	0.007751	no					0.958897	2.47025e-64	0.0363142	0.00478924	rs4810362	0.227981
LTL-VTE	51	20:62227081:A:G	rs311489	20q13.33	20	62227081	2.19976e-09	62200860	62264325	30	3	1	rs311489	1	rs311489	exonic	9.108	1f	HELZ2, GMEB2, STMN3	GMEB2, STMN3, TNFRSF6B	1.0217	9.1e-15	yes	rs35640778	20	61726373	62811392	1.0226	0.005395	no					0.936682	8.58459e-189	0.0488248	0.0144933	rs35640778	1
LTL-HF	1	1:114433970:G:T	rs1217392	1p13.2	1	114433970	1.91612e-08	114417437	114449117	18	1	1	rs1217392	1	rs1217392	ncRNA_intronic	1.368	7	PTPN22, BCL2L15, AP4B1, DCLRE1B	MAGI3, BCL2L15, AP4B1, DCLRE1B	0.9819	3.7e-18	yes	rs17464525	1	113922338	114555118	1.0202	0.01524	no					0.947858	3.74645e-30	0.046298	0.00584365	rs17464525	0.99996
LTL-HF	2	1:226619227:A:T	rs10915994	1q42.12	1	226619227	3.56988e-12	226609339	226705632	30	8	2	rs10915994;rs11585765	1	rs10915994	intergenic	13.26	5	#N/A	PARP1	0.9757	1.6e-23	yes	rs932002	1	226536645	226741284	1.0279	4.129e-06	no					0.924011	1.13452e-41	0.0539229	0.0220659	rs932002	0.215055
LTL-HF	3	3:49843723:C:T	rs3819325	3p21.31	3	49843723	2.85718e-10	49734229	49960388	116	59	1	rs3819325	1	rs3819325	intronic	1.486	NA	MST1, RNF123, AMIGO3, GMPPB, IP6K1, CDHR4, INKA1, UBA7, TRAIP, CAMKV, MST1R, MON1A	WDR6, AMT, NICN1, APEH, RNF123, GMPPB, IP6K1, CDHR4, INKA1, UBA7, MST1R, MON1A, RBM6, RBM5, SEMA3F, HYAL3, RASSF1	0.9872	1.1e-10	yes	rs7634084	3	49385350	50250837	1.0374	6.702e-05	no					0.845452	4.63988e-10	0.111374	0.0431741	rs11130224	0.245432
LTL-HF	4	3:160082284:C:T	rs76247316	3q25.33	3	160082284	7.40244e-13	160004026	160309529	169	122	2	rs76247316;rs56213443	1	rs76247316	intronic	2.559	6	IFT80, SMC4, TRIM59, KPNA4	SCHIP1, SMC4, TRIM59, KPNA4	0.9834	8.5e-17	yes	rs73154592	3	159922979	160401080	0.9717	0.0002767	no					0.617395	1.28064e-13	0.0754766	0.307128	rs2305407	0.0586837
LTL-HF	5	3:169643185:A:G	rs1290673	3q26.2	3	169643185	2.50039e-09	169292644	169724938	122	18	4	rs143005085;rs115052567;rs1290673;rs138017839	3	rs143005085;rs1290673;rs138017839	intronic	4.229	NA	MECOM, ACTRT3, SAMD7, SEC62	#N/A	1.0281	4.3e-21	yes	rs12638862	3	169182961	170281322	1.0241	0.03126	no					0.908866	0	0.0869136	0.0042206	rs2293607	0.898654
LTL-HF	6	4:122765649:C:T	rs10084948	4q27	4	122765649	2.53593e-10	122661021	122846028	135	71	1	rs10084948	1	rs10084948	intronic	0.111	7	SMIM43, EXOSC9, CCNA2, BBS7, TRPC3	SMIM43, EXOSC9, CCNA2, BBS7	0.9858	3.7e-12	yes	rs10024820	4	122660250	122846028	0.9731	0.0007001	no					0.488061	9.35165e-08	0.0868849	0.425053	rs35495505	0.0578124
LTL-HF	7	7:129685597:A:G	rs56179563	7q32.2	7	129685597	3.90109e-08	129663496	129685597	2	1	1	rs56179563	1	rs56179563	intronic	0.674	7	ZC3HC1	#N/A	1.0126	2e-09	yes	rs11556924	7	129663496	129685597	0.9731	0.001013	no					0.651567	0.000430321	0.111322	0.234167	rs56179563	0.661223
LTL-HF	8	8:21868358:A:C	rs11779558	8p21.3	8	21868358	2.91108e-11	21770372	21872853	75	19	3	rs11779558;rs4872083;rs61649210	1	rs11779558	intergenic	7.658	1d	DOK2, XPO7, NPM2	GFRA2, XPO7	1.0203	3.2e-23	yes	rs2306646	8	21770372	21900757	1.0202	0.01074	no					0.857889	5.71708e-20	0.0985258	0.0435852	rs2306646	0.0934721
LTL-HF	9	8:56708701:C:T	rs10100659	8q12.1	8	56708701	7.92039e-09	56647919	56756488	161	6	1	rs10100659	1	rs10100659	exonic	15.44	7	TMEM68, TGS1	TMEM68, TGS1	1.03	9.8e-21	yes	rs10808899	8	56647919	57264456	0.9706	0.01655	no					0.915701	3.83787e-17	0.0431255	0.0411737	rs7823773	0.0375567
LTL-HF	10	10:105498065:C:T	rs7085077	10q24.33	10	105498065	3.96847e-09	105481068	105566028	27	4	2	rs7085077;rs7073079	1	rs7085077	intronic	15.97	5	SH3PXD2A	NEURL1, SH3PXD2A	1.0133	2.8e-08	yes	rs9419958	10	105464082	106328016	1.0346	0.0001953	no					0.917602	1.6106e-161	0.0597677	0.02263	rs1265164	0.42957
LTL-HF	11	10:106151444:C:T	rs17116984	10q25.1	10	106151444	2.10201e-08	106144987	106152899	5	2	1	rs17116984	1	rs17116984	intronic	1.682	2b	CFAP58	#N/A	1.0601	4.9e-12	yes	rs9419958	10	105464082	106328016	0.8981	0.00284	no					0.938959	1.02112e-161	0.0378839	0.0231567	rs1265164	0.42957
LTL-HF	12	11:5214940:A:G	rs6578581	11p15.4	11	5214940	2.20665e-09	5214857	5246514	15	8	3	rs6578581;rs6578583;rs28392686	2	rs6578581;rs6578583	intergenic	1.269	7	OR52A1, OR51V1, HBB, HBD	#N/A	0.981	2.8e-19	yes	rs1609812	11	4665613	5248641	0.979	0.02141	no					0.904916	4.06183e-59	0.0891816	0.00590196	rs1609812	0.735082
LTL-HF	13	12:111904371:A:T	rs4766578	12q24.12	12	111904371	1.48859e-16	111708458	112985328	600	55	7	rs4766578;rs648997;rs642536;rs2238151;rs1265564;rs4375492;rs11066320	2	rs4766578;rs11066320	intronic	1.682	6	CUX2, SH2B3, ATXN2, BRAP, ACAD10, ALDH2, MAPKAPK5, TMEM116, ERP29, NAA25, TRAFD1, HECTD4, RPL6, PTPN11	GPN3, PHETA1, SH2B3, ACAD10, ALDH2, MAPKAPK5, TMEM116, NAA25, HECTD4	0.9839	1.7e-15	yes	rs10774625	12	111818487	112939853	1.0443	4.899e-08	yes	rs4766578	12	111826477	112896840	0.000119723	5.25968e-11	0.00634451	0.993536	rs4766578	0.652201
LTL-HF	14	14:73392963:A:T	rs28372931	14q24.2	14	73392963	2.55461e-09	73376097	73550767	29	3	2	rs11623972;rs28372931	2	rs11623972;rs28372931	upstream	3.092	2b	DCAF4, ZFYVE1, RBM25	DPF3, DCAF4, PSEN1	1.0323	1.9e-15	yes	rs3815460	14	73183749	74217790	1.0518	0.008818	no					0.84092	1.15729e-37	0.139613	0.0194669	rs56905972	0.147971
LTL-HF	15	16:69963355:A:G	rs1566452	16q22.1	16	69963355	4.46311e-08	69945092	70112729	171	2	1	rs1566452	1	rs1566452	exonic	19.17	5	WWP2, CLEC18A	NOB1, WWP2, CLEC18A, EXOSC6, COG4	1.016	3.8e-12	yes	rs3785074	16	69086332	70646213	0.975	0.004345	no					0.895771	9.16001e-19	0.0990244	0.00520437	rs35878591	0.118073
LTL-HF	16	17:1704398:A:C	rs34564270	17p13.3	17	1704398	1.4659e-12	1666132	1786075	115	73	2	rs34564270;rs8073376	1	rs34564270	intronic	0.007	6	SERPINF2, SERPINF1, SMYD4, RPA1	SERPINF1, SMYD4, RPA1, RTN4RL1	0.9766	3.4e-21	yes	rs7218033	17	1660801	2584946	1.0346	0.0004946	no					0.427315	8.33581e-17	0.27497	0.297715	rs7217857	0.192486
LTL-HF	17	17:41340498:A:G	rs150935822	17q21.31	17	41340498	1.32776e-08	41173086	41458020	16	2	2	rs150935822;rs56799554	2	rs150935822;rs56799554	intronic	14.2	6	IFI35, VAT1, RND2, BRCA1, NBR1	VAT1, BRCA1, NBR1, TMEM106A	0.9447	2.7e-14	yes	rs12941945	17	41085683	41469457	1.0957	0.00503	no					0.920042	3.3013e-17	0.0385967	0.041361	rs56799554	0.373242
LTL-HF	18	20:35669035:C:T	rs6017105	20q11.23	20	35669035	4.00511e-09	35516960	35868046	113	11	2	rs6017105;rs6072798	1	rs6017105	intronic	1.003	6	TLDC2, SAMHD1, RBL1, MROH8, RPN2	TGIF2, TLDC2, SAMHD1, RBL1, MROH8	1.0184	9.2e-20	yes	rs1291143	20	35072641	35906537	1.0172	0.0293	no					0.959323	2.19152e-64	0.0322126	0.00846483	rs1291143	0.24502
LTL-HF	19	20:62292137:C:T	rs6062296	20q13.33	20	62292137	1.33643e-08	62127121	62565646	60	9	5	rs310619;rs6062296;rs75667187;rs73151706;rs111359627	5	rs310619;rs6062296;rs75667187;rs73151706;rs111359627	intronic	8.531	5	EEF1A2, HELZ2, GMEB2, STMN3, RTEL1, TNFRSF6B, ARFRP1, ZGPAT, LIME1, SLC2A4RG, ZBTB46, ABHD16B, TPD52L2, DNAJC5, UCKL1	EEF1A2, PPDPF, STMN3, RTEL1, TNFRSF6B, TPD52L2, UCKL1, PRPF6, TCEA2, RGS19, OPRL1	1.0185	5.2e-20	yes	rs35640778	20	61726373	62811392	1.0188	0.04174	no					0.90985	1.13671e-188	0.0646439	0.0255057	rs35640778	1
LTL-HF	20	22:51017082:A:T	rs131758	22q13.33	22	51017082	1.31238e-08	50991033	51034961	17	1	1	rs131758	1	rs131758	UTR5	19.37	2b	KLHDC7B, SYCE3, CPT1B, CHKB, MAPK8IP2	LMF2, TYMP, CIMAP1B, CPT1B, CHKB, MAPK8IP2	1.0162	5.2e-15	yes	rs131794	22	50795620	51072289	1.0198	0.01611	no					0.943297	7.80747e-19	0.0485926	0.00811027	rs140522	0.203323
LTL-PAD	1	1:20904743:C:T	rs1152991	1p36.12	1	20904743	9.88172e-10	20889794	20910770	7	2	2	rs1152991;rs472055	1	rs1152991	intergenic	0.794	2b	FAM43B, CDA	CDA	1.0124	1.3e-09	yes	rs66731853	1	20884619	20994278	0.9608	0.014	no					0.832587	9.58719e-11	0.107877	0.0595354	rs66731853	0.59365
LTL-PAD	2	1:114436970:C:T	rs10745340	1p13.2	1	114436970	3.3172e-10	114417437	114542914	64	7	2	rs10745340;rs11102708	1	rs10745340	ncRNA_intronic	4.433	5	PTPN22, BCL2L15, AP4B1, DCLRE1B, HIPK1, OLFML3	MAGI3, BCL2L15, AP4B1, DCLRE1B, HIPK1, OLFML3	0.9818	2.4e-18	yes	rs17464525	1	113922338	114555118	1.0305	0.062	no					0.81772	1.36693e-29	0.168931	0.0133487	rs17464525	0.999957
LTL-PAD	3	1:226741284:A:T	rs4653751	1q42.12	1	226741284	9.24295e-09	226613126	226741284	23	7	4	rs4653745;rs1299858;rs11585765;rs4653751	2	rs4653745;rs4653751	intronic	2.631	5	STUM	PARP1	0.9803	8.2e-11	yes	rs932002	1	226536645	226741284	0.9418	0.014	no					0.67811	6.60677e-41	0.314137	0.00775353	rs932002	0.214455
LTL-PAD	4	2:17894461:C:T	rs6731131	2p24.2	2	17894461	3.16686e-08	17816326	17991974	144	1	1	rs6731131	1	rs6731131	intronic	2.292	5	VSNL1, SMC6, GEN1, MSGN1	RAD51AP2, SMC6, GEN1, KCNS3	0.9857	1.6e-11	yes	rs2555104	2	17618105	17991974	0.9704	1.682e-05	no					0.818905	5.30987e-07	0.146265	0.0348265	rs6731131	0.289447
LTL-PAD	5	3:50174572:C:T	rs13100903	3p21.31	3	50174572	5.65976e-10	49976144	50176739	31	1	1	rs13100903	1	rs13100903	ncRNA_intronic	6.808	5	MON1A, RBM6, RBM5	QRICH1, LAMB2, IHO1, AMT, NICN1, DAG1, BSN, RNF123, GMPPB, IP6K1, INKA1, UBA7, MST1R, RBM6, RBM5, SEMA3F, HYAL3, NAA80, HEMK1	0.987	4.4e-10	yes	rs7634084	3	49385350	50250837	1.0408	0.014	no					0.879633	2.96011e-10	0.0710318	0.0493351	rs7634084	0.147035
LTL-PAD	6	3:128209667:C:T	rs2860228	3q21.3	3	128209667	1.4359e-10	128197282	128296506	28	4	3	rs2860228;rs9851497;rs2713575	2	rs2860228;rs2713575	ncRNA_intronic	11.34	NA	GATA2	RPN1, ACAD9	0.984	1.4e-15	yes	rs6776756	3	128197282	128425253	0.9704	0.083	no					0.842147	1.09415e-11	0.0956764	0.0621768	rs6776756	0.935162
LTL-PAD	7	3:169616725:C:T	rs150369728	3q26.2	3	169616725	6.15384e-11	169610961	169723511	53	40	3	rs150369728;rs16854522;rs146720054	3	rs150369728;rs16854522;rs146720054	intergenic	1.086	7	SAMD7, SEC62	#N/A	0.9337	4.4e-21	yes	rs12638862	3	169182961	170281322	0.8781	0.05	no					0.198012	0	0.798842	0.00314627	rs2293607	0.92255
LTL-PAD	8	5:1295373:C:T	rs35226131	5p15.33	5	1295373	9.73736e-14	1292958	1295682	5	5	1	rs35226131	1	rs35226131	upstream	8.111	NA	TERT	#N/A	0.9434	8.6e-23	yes	rs7705526	5	1100831	1679863	0.8781	0.014	no					0.399771	6.51946e-275	0.596251	0.00397787	rs7705526	1
LTL-PAD	9	6:29306456:A:G	rs3130805	6p22.1	6	29306456	1.34817e-15	25684606	29612325	1856	291	19	rs10484439;rs9467714;rs9379899;rs4452638;rs3949215;rs1165165;rs548987;rs6904596;rs6901575;rs13190937;rs3130805;rs1014258;rs10447393;rs29218;rs11963067;rs2394122;rs9393929;rs3129151;rs3117327	3	rs10484439;rs6904596;rs3130805	intergenic	1.894	6	SCGN, SLC17A4, SLC17A1, SLC17A3, SLC17A2, TRIM38, H1-1, H4C2, H1-2, HFE, H4C3, H1-6, H2BC4, H2AC6, H2BC5, H3C4, H2AC7, BTN3A2, BTN2A2, BTN3A1, BTN3A3, BTN2A1, BTN1A1, HMGN4, ABT1, ZNF322, H2BC11, H2AC11, PRSS16, POM121L2, ZNF391, ZNF184, H2BC13, H2AC13, H4C11, H2BC15, H1-5, H3C12, OR2B2, OR2B6, ZNF165, ZSCAN16, ZKSCAN8, ZSCAN9, ZKSCAN4, NKAPL, PGBD1, ZSCAN31, ZKSCAN3, ZSCAN12, ZSCAN23, GPX6, GPX5…	TRIM38, HFE, H2AC6, H2BC5, H4C8, BTN3A2, BTN3A1, BTN3A3, BTN2A1, HMGN4, ABT1, ZNF322, H2BC11, H2BC12, PRSS16, ZNF391, H2BC15, ZNF165, ZSCAN16, ZSCAN9, ZKSCAN4, NKAPL, PGBD1, ZSCAN31, ZKSCAN3, ZSCAN12, ZSCAN23, SCAND3, TRIM27, ZNF311, GABBR1, OR2H2	0.9804	8.9e-14	yes	rs13198474	6	24988105	29612325	1.1163	9e-05	no					0.0281479	2.15268e-13	0.965054	0.0067977	rs3129151	0.155604
LTL-PAD	10	7:99818927:C:T	rs705867	7q22.1	7	99818927	4.59134e-10	99771849	99843353	24	5	1	rs705867	1	rs705867	ncRNA_intronic	3.356	1f	GAL3ST4, GPC2, STAG3, PVRIG	ZSCAN21, AP4M1, TAF6, TRAPPC14, GPC2, PVRIG, PILRB, PILRA, ZCWPW1, TSC22D4, NYAP1, UFSP1	0.9885	8e-09	yes	rs2056726	7	99699436	100111776	0.9608	0.017	no					0.880688	1.27019e-15	0.110116	0.00919586	rs2056726	0.14242
LTL-PAD	11	7:128695279:A:G	rs2242029	7q32.1	7	128695279	2.64528e-08	128563014	128710988	22	4	1	rs2242029	1	rs2242029	upstream	16.49	1a	IRF5, TNPO3	IRF5, TNPO3, TSPAN33	1.0191	4.4e-13	yes	rs3757387	7	128562578	128710988	1.0513	0.026	no					0.892461	1.12877e-18	0.0974074	0.010132	rs4728142	0.113563
LTL-PAD	12	8:21884544:A:G	rs11776272	8p21.3	8	21884544	1.3143e-11	21875786	21898763	14	2	2	rs11776272;rs11992609	1	rs11776272	intronic	2.293	7	NPM2, FGF17, DMTN	GFRA2, DOK2, FGF17, DMTN	0.9842	1e-13	yes	rs2306646	8	21770372	21900757	1.0408	0.015	no					0.811381	1.05176e-19	0.181328	0.00729039	rs2306646	0.14848
LTL-PAD	13	8:47923945:A:C	rs2133480	8q11.1	8	47923945	1.31589e-08	47849091	48826333	14	2	1	rs2133480	1	rs2133480	intergenic	0.741	NA	SPIDR, PRKDC	MCM4	0.9704	2.6e-18	yes	rs762679	8	46904029	49037652	1.0513	0.027	no					0.862882	3.81427e-14	0.0394749	0.0976432	rs62539106	0.325933
LTL-PAD	14	8:73983040:A:G	rs12550150	8q13.3	8	73983040	1.0632e-08	73910918	73984923	63	2	1	rs12550150	1	rs12550150	intronic	3.458	6	TERF1, SBSPON	TERF1, SBSPON	1.022	1.9e-20	yes	rs10112752	8	73840613	74035118	1.0408	0.068	no					0.878337	9.07763e-40	0.10964	0.0120232	rs10112752	0.581593
LTL-PAD	15	10:101513585:A:G	rs10786569	10q24.2	10	101513585	2.9814e-08	101364345	101520334	52	3	1	rs10786569	1	rs10786569	intronic	2.449	7	SLC25A28, ENTPD7, CUTC, COX15	SLC25A28, ENTPD7, ABCC2	0.9899	5.7e-07	yes	rs12412214	10	101271789	101589328	1.0408	0.016	no					0.389029	3.39934e-22	0.607046	0.00392466	rs12412214	0.128145
LTL-PAD	16	10:105553793:A:C	rs35478175	10q24.33	10	105553793	1.90909e-09	104980048	105705894	127	5	4	rs4918003;rs35478175;rs4918053;rs12767259	4	rs4918003;rs35478175;rs4918053;rs12767259	intronic	0.593	4	RPEL1, INA, PCGF6, TAF5, ATP5MK, PDCD11, SH3PXD2A, STN1	WBP1L, AS3MT, CNNM2, NT5C2, INA, ATP5MK, PDCD11, CALHM2, STN1, SLK, COL17A1, SFR1	1.0426	9.9e-20	yes	rs9419958	10	105464082	106328016	0.9231	0.044	no					0.066679	2.51235e-160	0.932658	0.000663481	rs9419958	0.39894
LTL-PAD	17	11:107862886:A:G	rs724788	11q22.3	11	107862886	3.88194e-10	107862668	108304509	11	5	2	rs724788;rs11601596	2	rs724788;rs11601596	intergenic	11.96	5	CUL5, ACAT1, ATM, C11orf65	ACAT1, NPAT, ATM	1.0205	2.3e-19	yes	rs611646	11	107844790	108439087	1.0513	0.005	no					0.866093	2.7839e-67	0.125714	0.0081932	rs611646	0.240634
LTL-PAD	18	12:111904371:A:T	rs4766578	12q24.12	12	111904371	3.14322e-26	111426615	112943197	600	260	8	rs4766578;rs629404;rs57186456;rs4766897;rs4378452;rs1265564;rs10849941;rs11066320	2	rs4766578;rs11066320	intronic	1.682	6	CUX2, SH2B3, ATXN2, BRAP, ACAD10, ALDH2, MAPKAPK5, TMEM116, ERP29, NAA25, TRAFD1, HECTD4, RPL6, PTPN11	GPN3, PHETA1, SH2B3, ACAD10, ALDH2, MAPKAPK5, TMEM116, NAA25, HECTD4	0.9839	1.7e-15	yes	rs10774625	12	111818487	112939853	1.0443	4.899e-08	yes	rs10774624	12	111826477	112906415	3.50959e-27	1.95122e-09	0.271495	0.728505	rs10774624	0.999727
LTL-PAD	19	13:41694272:A:T	rs9525451	13q14.11	13	41694272	9.95701e-09	41693593	41769660	19	2	1	rs9525451	1	rs9525451	intergenic	4.247	6	KBTBD6, KBTBD7	KBTBD6, KBTBD7	0.9749	1.4e-20	yes	rs1332941	13	41691236	41772319	0.9608	0.11	no					0.7172	3.34707e-15	0.255219	0.0275814	rs9525451	0.200728
LTL-PAD	20	14:65544367:A:C	rs762810	14q23.3	14	65544367	1.44357e-14	65437937	65619418	191	95	8	rs762810;rs8018788;rs7148693;rs4902371;rs11623866;rs12587546;rs11628273;rs2296316	1	rs762810	UTR3	14.04	NA	FNTB, RAB15, MAX	SPTB, CHURC1, FNTB, RAB15, MAX	0.9799	4.3e-22	yes	rs45604339	14	64846224	65628009	1.0408	0.0043	no					0.0798997	4.37643e-16	0.288718	0.631382	rs762810	0.557866
LTL-PAD	21	14:91883499:A:G	rs1742546	14q32.12	14	91883499	3.42e-10	91871672	92057960	179	26	2	rs1742546;rs8006485	1	rs1742546	intronic	14.16	2b	CCDC88C, PPP4R3A, CATSPERB	CCDC88C	0.9845	1.6e-14	yes	rs8006485	14	91836982	92099719	0.9704	0.091	no					0.915386	2.65411e-17	0.0607461	0.0238675	rs8006485	0.0435043
LTL-PAD	22	15:50366910:A:G	rs2899453	15q21.2	15	50366910	3.83642e-09	50360838	50509591	16	2	2	rs2899453;rs1365508	1	rs2899453	intronic	12	7	ATP8B4, SLC27A2	#N/A	1.0198	1.5e-22	yes	rs41362650	15	50195949	50797021	1.0202	0.29	no					0.856565	1.88714e-39	0.134759	0.00867599	rs41362650	0.247465
LTL-PAD	23	15:55997544:A:T	rs3985768	15q21.3	15	55997544	7.81391e-09	55941286	56063653	66	5	1	rs3985768	1	rs3985768	intronic	1.799	5	PRTG	PRTG, MNS1	0.9891	6e-08	yes	rs1980240	15	55941286	56784345	1.0408	0.011	no					0.453062	0.0008627	0.100427	0.441774	rs3985768	0.305435
LTL-PAD	24	15:74336633:C:T	rs5742915	15q24.1	15	74336633	6.22492e-09	74336633	74336633	1	1	1	rs5742915	1	rs5742915	exonic	8.73	5	PML	STOML1	1.0195	1.6e-21	yes	rs5742915	15	74248477	74354152	1.0171	0.01171	no					0.803596	3.10033e-15	0.1669	0.0295039	rs5742915	0.999992
LTL-PAD	25	15:78757913:A:C	rs2938674	15q25.1	15	78757913	1.85463e-09	78712119	78936168	189	36	3	rs2938674;rs1317286;rs1964678	1	rs2938674	intronic	3.382	NA	IREB2, HYKK, PSMA4, CHRNA5, CHRNA3, CHRNB4	IREB2, HYKK, PSMA4, CHRNA5, ADAMTS7	1.0113	2.9e-06	no					0.9048	2e-07	yes	rs1317286	15	78719832	78936168	1.93879e-13	0.314306	0.679846	0.00584814	rs1317286	0.557144
LTL-PAD	26	16:69413919:C:T	rs9938316	16q22.1	16	69413919	2.28346e-08	69141138	69432250	118	1	1	rs9938316	1	rs9938316	intronic	0.545	7	HAS3, CHTF8, UTP4, SNTB2, VPS4A, COG8, PDF, NIP7, TMED6, TERF2	PLA2G15, UTP4, SNTB2, VPS4A, COG8, PDF, NIP7, TMED6, TERF2	1.0208	6.2e-19	yes	rs3785074	16	69086332	70646213	1.0408	0.05	no					0.916317	6.61915e-22	0.0687246	0.0149583	rs3785074	0.292108
LTL-PAD	27	16:69973127:A:G	rs2270843	16q22.1	16	69973127	1.09995e-10	69958495	70618290	438	15	3	rs2270843;rs7190686;rs8062183	1	rs2270843	intronic	3.797	4	WWP2, CLEC18A, PDPR, EXOSC6, AARS1, DDX19B, DDX19A, ST3GAL2, FCSK, COG4, SF3B3, IL34	WWP2, CLEC18A, PDPR, EXOSC6, DDX19B, DDX19A, COG4, SF3B3, IL34	0.981	2.6e-20	yes	rs3785074	16	69086332	70646213	1.0305	0.072	no					0.853253	6.82641e-19	0.0737425	0.0730046	rs1134074	0.522003
LTL-PAD	28	16:74657485:A:T	rs8058133	16q23.1	16	74657485	4.28488e-09	74201744	74710254	88	2	2	rs8058133;rs9935986	1	rs8058133	UTR3	6.853	3a	PSMD7, GLG1, RFWD3, MLKL	GLG1, RFWD3, MLKL	0.9807	2.6e-22	yes	rs11866592	16	74198061	74740249	0.9802	0.28	no					0.905674	1.84716e-28	0.0794418	0.0148844	rs11866592	0.17081
LTL-PAD	29	17:1758227:G:T	rs4435293	17p13.3	17	1758227	2.51456e-10	1666132	1786075	117	16	3	rs4435293;rs59409453;rs9905257	1	rs4435293	intronic	4.433	5	SERPINF2, SERPINF1, SMYD4, RPA1	SERPINF1, SMYD4, RPA1, RTN4RL1	0.9811	7.8e-19	yes	rs7218033	17	1660801	2584946	1.0618	0.0011	no					0.707421	5.71939e-17	0.188763	0.103816	rs7218033	0.416465
LTL-PAD	30	17:41448228:A:G	rs12941945	17q21.31	17	41448228	2.27263e-09	41095586	41459600	74	11	2	rs12941945;rs147110949	1	rs12941945	ncRNA_exonic	2.38	6	AARSD1, PTGES3L, RUNDC1, RPL27, IFI35, VAT1, RND2, BRCA1, NBR1, TMEM106A	DHX58, TUBG2, RPL27, IFI35, VAT1, BRCA1, NBR1, TMEM106A, MEOX1	0.9742	3e-22	yes	rs12941945	17	41085683	41469457	1.0513	0.044	no					0.28758	5.54806e-16	0.649276	0.0631438	rs12941945	0.309165
LTL-PAD	31	18:42090667:C:T	rs2048485	18q12.3	18	42090667	3.64243e-11	41968564	42200964	223	31	4	rs7228835;rs2063503;rs7232604;rs2048485	2	rs7228835;rs2048485	ncRNA_intronic	3.308	5	#N/A	#N/A	0.9726	2.1e-22	yes	rs8088824	18	41816365	42299345	1.0618	0.0066	no					0.747671	3.68608e-22	0.121319	0.13101	rs9944794	0.0827307
LTL-PAD	32	19:22554854:C:T	rs1865075	19p12	19	22554854	6.24962e-09	22092288	22642916	533	17	2	rs1865075;rs10410114	1	rs1865075	intergenic	1.515	NA	ZNF208, ZNF257, ZNF729, ZNF98	ZNF708, ZNF429, ZNF208, ZNF257, ZNF98	0.981	1.6e-21	yes	rs8105767	19	22076395	22722254	0.9802	0.19	no					0.705044	1.23792e-43	0.287016	0.00793971	rs8105767	0.999736
LTL-PAD	33	20:35545926:C:T	rs1935920	20q11.23	20	35545926	3.52562e-09	35509865	35603394	24	6	2	rs1935920;rs6016882	1	rs1935920	intronic	0.021	NA	TLDC2, SAMHD1	SAMHD1	1.0168	7.7e-12	yes	rs1291143	20	35072641	35906537	1.0618	0.002	no					0.85151	9.14912e-64	0.134502	0.0139884	rs1291143	0.231033
LTL-PAD	34	22:23897780:C:T	rs28376	22q11.23	22	23897780	5.69101e-11	23890836	23903613	8	3	1	rs28376	1	rs28376	intergenic	0.613	5	#N/A	#N/A	1.0077	0.0003	no					1.0725	2.4e-05	no					2.5667e-07	0.549844	0.0524235	0.397729	rs28376	0.993808
LTL-PAD	35	22:50989326:A:G	rs131778	22q13.33	22	50989326	2.2462e-08	50984416	51004371	15	1	1	rs131778	1	rs131778	UTR3	8.452	NA	KLHDC7B, SYCE3, CPT1B	LMF2, TYMP, CIMAP1B, KLHDC7B, CPT1B, CHKB, MAPK8IP2	1.0138	5.8e-12	yes	rs131794	22	50795620	51072289	0.9704	0.053	no					0.831765	2.54397e-18	0.15835	0.00988543	rs131794	0.264655
LTL-Stroke	1	1:114447914:G:T	rs971173	1p13.2	1	114447914	9.15529e-09	114312623	114449117	48	5	2	rs971173;rs10858023	1	rs971173	UTR5	11.04	NA	RSBN1, PTPN22, BCL2L15, AP4B1, DCLRE1B	MAGI3, BCL2L15, AP4B1, DCLRE1B	1.0171	3.6e-15	yes	rs17464525	1	113922338	114555118	0.9811	0.006306	no					0.935432	4.63088e-30	0.0572274	0.00734016	rs17464525	0.999966
LTL-Stroke	2	1:156190083:A:G	rs6427307	1q22	1	156190083	1.329e-12	156156094	156206121	95	66	2	rs6427307;rs1052067	1	rs6427307	intronic	3.868	7	SEMA4A, SLC25A44, PMF1, BGLAP, PAQR6	SEMA4A, SLC25A44, PMF1, PAQR6, SMG5, TMEM79, GLMP	1.0087	3.5e-05	no					0.9495	1.032e-14	yes	rs1060604	1	156156094	156206121	8.77824e-11	0.209573	0.0656883	0.724739	rs2540173	0.0970954
LTL-Stroke	3	2:54371613:C:G	rs13404903	2p16.2	2	54371613	1.17201e-09	53947957	54391842	23	2	2	rs13404903;rs116777637	1	rs13404903	intronic	4.72	7	ASB3, CHAC2, ERLEC1, GPR75, PSME4, ACYP2	GPR75, ACYP2	0.9661	2e-17	yes	rs965109	2	53704374	54820213	1.0351	0.004698	no					0.899789	3.05381e-50	0.0889788	0.0112317	rs965109	0.244534
LTL-Stroke	4	3:50052834:C:T	rs6446191	3p21.31	3	50052834	2.76535e-08	49899795	50234126	215	2	1	rs6446191	1	rs6446191	intronic	0.05	7	TRAIP, CAMKV, MST1R, MON1A, RBM6, RBM5, SEMA3F, GNAT1	WDR6, AMT, NICN1, BSN, APEH, MST1, RNF123, GMPPB, IP6K1, CDHR4, INKA1, UBA7, MST1R, MON1A, RBM6, RBM5, SEMA3F, GNAI2, HYAL3, NAA80, HYAL1, RASSF1, CYB561D2, CACNA2D2, HEMK1	0.9874	3.7e-10	yes	rs7634084	3	49385350	50250837	1.0232	0.00152	no					0.709385	1.17389e-09	0.281877	0.00873743	rs2230590	0.101301
LTL-Stroke	5	3:128210342:A:C	rs1986452	3q21.3	3	128210342	2.19529e-08	128203494	128223300	8	3	1	rs1986452	1	rs1986452	ncRNA_intronic	9.132	4	GATA2	ACAD9	0.984	1.2e-15	yes	rs6776756	3	128197282	128425253	0.9844	0.01797	no					0.954022	4.66279e-12	0.0407943	0.00518367	rs6776756	0.731439
LTL-Stroke	6	3:169627094:A:G	rs3863108	3q26.2	3	169627094	1.85633e-11	169606576	169923523	133	35	3	rs3863108;rs1290670;rs77426195	1	rs3863108	intergenic	0.693	NA	SAMD7, SEC62	#N/A	1.0277	5e-20	yes	rs12638862	3	169182961	170281322	1.0285	0.003372	no					0.93619	0	0.0584285	0.0053817	rs2293607	0.923108
LTL-Stroke	7	4:48843372:A:G	rs4695407	4p11	4	48843372	4.25056e-08	48466781	48925948	222	2	1	rs4695407	1	rs4695407	intronic	6.518	5	SLC10A4, ZAR1, FRYL, OCIAD1, OCIAD2	NFXL1, TEC, SLAIN2, SLC10A4, OCIAD1, CWH43	1.0143	1.5e-12	yes	rs4695407	4	48466781	48925948	1.0165	0.01096	no					0.956439	9.62538e-09	0.0181312	0.0254294	rs4695407	0.127958
LTL-Stroke	8	5:132444128:A:G	rs72801474	5q31.1	5	132444128	3.67522e-10	132349654	132467373	7	3	1	rs72801474	1	rs72801474	intergenic	0.703	5	ZCCHC10, HSPA4	SHROOM1, HSPA4	0.9795	3.9e-09	yes	rs72801474	5	132349654	132467373	0.953	5.527e-05	no					0.0569855	0.000105819	0.00696698	0.935179	rs72801474	0.976865
LTL-Stroke	9	6:27198343:G:T	rs67457459	6p22.2	6	27198343	4.09937e-10	25480328	29607101	884	136	5	rs1186313;rs55706012;rs67457459;rs13191038;rs3094569	4	rs1186313;rs67457459;rs13191038;rs3094569	intergenic	13.45	2b	CARMIL1, SCGN, SLC17A4, SLC17A1, SLC17A3, SLC17A2, TRIM38, H1-1, H4C2, H1-2, HFE, H2BC4, H2AC6, H2BC5, H3C4, H2AC7, BTN3A1, BTN3A3, BTN2A1, BTN1A1, HMGN4, ABT1, ZNF322, H2BC11, H2AC11, H2BC12, PRSS16, POM121L2, ZNF391, ZNF184, H2BC13, H2AC13, H4C11, H2BC15, H1-5, H3C12, OR2B2, OR2B6, ZNF165, ZSCAN16, ZKSCAN8, ZSCAN9, ZKSCAN4, NKAPL, PGBD1, ZSCAN31, ZKSCAN3, ZSCAN12, ZSCAN23, GPX6, SCAND3, TRIM27,…	TRIM38, HFE, H2AC6, H2BC5, H4C8, BTN3A2, BTN2A1, HMGN4, ZNF322, H2BC11, H2BC12, PRSS16, ZNF391, H2BC15, ZNF165, ZSCAN16, ZSCAN9, ZKSCAN4, NKAPL, PGBD1, ZSCAN31, ZKSCAN3, ZSCAN12, ZSCAN23, SCAND3, TRIM27, ZNF311, GABBR1, OR2H2	0.978	8.3e-14	yes	rs13198474	6	24988105	29612325	1.0359	0.0008153	no					0.757627	9.34978e-12	0.116583	0.12579	rs35869525	0.307714
LTL-Stroke	10	8:21867834:A:G	rs748350	8p21.3	8	21867834	3.43921e-10	21770763	21872853	72	16	1	rs748350	1	rs748350	intergenic	8.486	4	DOK2, XPO7, NPM2	GFRA2, XPO7	1.0204	5.2e-23	yes	rs2306646	8	21770372	21900757	1.0161	0.01943	no					0.885751	4.97163e-20	0.0856883	0.0285607	rs2306646	0.111328
LTL-Stroke	11	8:73901272:C:T	rs6983580	8q21.11	8	73901272	4.19037e-09	73875546	73936451	28	8	1	rs6983580	1	rs6983580	intergenic	11.64	7	TERF1	#N/A	0.9848	2.4e-13	yes	rs10112752	8	73840613	74035118	1.0203	0.002218	no					0.944467	4.22095e-40	0.0509819	0.00455065	rs10112752	0.431718
LTL-Stroke	12	10:96434823:C:T	rs34870400	10q23.33	10	96434823	1.98723e-08	96351247	96757047	248	6	2	rs34870400;rs77380994	1	rs34870400	intergenic	2.351	7	HELLS, CYP2C18, CYP2C19, CYP2C9	HELLS, CYP2C19, ACSM6	0.9854	8.3e-10	yes	rs12572897	10	95958289	96757047	1.0261	0.0009406	no					0.822396	2.96699e-21	0.143384	0.0342197	rs3758526	0.465798
LTL-Stroke	13	10:105708813:G:T	rs1342212	10q24.33	10	105708813	7.91791e-13	105464082	105720733	215	57	11	rs34594271;rs11191778;rs2019970;rs12766594;rs6584579;rs7901849;rs11191835;rs3752948;rs7919263;rs56093138;rs1342212	4	rs34594271;rs12766594;rs11191835;rs1342212	intergenic	0.435	5	SH3PXD2A, STN1, SLK	NEURL1, SH3PXD2A, STN1, SLK, COL17A1, CFAP43, GSTO1	0.9812	6e-19	yes	rs9419958	10	105464082	106328016	1.0254	0.0002377	yes	rs55983834	10	105595430	105671248	0.00287167	2.68594e-160	0.9971	2.83683e-05	rs1265164	0.405417
LTL-Stroke	14	11:47454551:A:T	rs4434960	11p11.2	11	47454551	8.08178e-09	47377283	47883337	77	8	1	rs4434960	1	rs4434960	intergenic	2.218	6	MYBPC3, SPI1, SLC39A13, PSMC3, RAPSN, CELF1, NDUFS3, PTPMT1, KBTBD4, FAM180B, C1QTNF4, MTCH2, AGBL2, FNBP4, NUP160	ARHGAP1, ZNF408, ACP2, NR1H3, MADD, MYBPC3, SLC39A13, PSMC3, RAPSN, CELF1, PTPMT1, C1QTNF4, AGBL2, FNBP4, PTPRJ	0.9876	1.4e-09	yes	rs2293579	11	47377283	47883337	0.9782	0.0009467	no					0.401512	0.000218305	0.467933	0.130149	rs10742802	0.139357
LTL-Stroke	15	12:54687489:C:T	rs7304860	12q13.13	12	54687489	1.51296e-08	54630517	54736470	12	1	1	rs7304860	1	rs7304860	ncRNA_intronic	0.079	6	CBX5, HNRNPA1, NFE2, COPZ1	HNRNPA1, NFE2, GPR84	0.9892	3.4e-07	yes	rs79755767	12	54596827	54749193	1.029	5.769e-05	no					0.269567	1.7343e-09	0.726492	0.00394127	rs79755767	0.828875
LTL-Stroke	16	12:111910219:A:G	rs10774625	12q24.12	12	111910219	5.84242e-25	111426615	112985328	667	309	9	rs10774625;rs593226;rs847895;rs4766897;rs2238151;rs4378452;rs1265564;rs7398796;rs10774623	1	rs10774625	intronic	2.748	5	CUX2, PHETA1, SH2B3, ATXN2, BRAP, ACAD10, ALDH2, MAPKAPK5, TMEM116, ERP29, NAA25, TRAFD1, HECTD4, RPL6, PTPN11	GPN3, PHETA1, SH2B3, ACAD10, ALDH2, MAPKAPK5, TMEM116, NAA25, HECTD4	0.9839	1.7e-15	yes	rs10774625	12	111818487	112939853	1.0561	6.232e-17	yes	rs10774625	12	111708458	112985328	3.46669e-13	3.04102e-11	0.00324593	0.996754	rs10774625	0.962436
LTL-Stroke	17	12:123688484:G:T	rs11057189	12q24.31	12	123688484	2.46408e-09	122810925	123897177	566	11	2	rs4319547;rs11057189	2	rs4319547;rs11057189	intronic	2.569	7	CLIP1, ZCCHC8, RSRC2, KNTC1, HCAR1, ABCB9, OGFOD2, ARL6IP4, PITPNM2, MPHOSPH9, MTRFR, CDK2AP1, SBNO1, KMT5A, RILPL2	CLIP1, ZCCHC8, RSRC2, KNTC1, HCAR1, ABCB9, OGFOD2, ARL6IP4, MPHOSPH9, MTRFR, CDK2AP1, KMT5A, SNRNP35	0.9804	1.5e-17	yes	rs1615350	12	122803643	123932679	0.9793	0.01306	no					0.907307	5.24659e-13	0.0655188	0.0271737	rs3018099	0.198817
LTL-Stroke	18	14:65562218:C:G	rs1953228	14q23.3	14	65562218	5.43775e-10	65475010	65619174	145	22	1	rs1953228	1	rs1953228	intronic	0.382	6	FNTB, MAX	CHURC1, FNTB, RAB15, MAX	0.9804	4.7e-21	yes	rs45604339	14	64846224	65628009	0.9801	0.01577	no					0.833037	2.29488e-16	0.151712	0.0152511	rs762810	0.265587
LTL-Stroke	19	14:73702858:C:G	rs78387414	14q24.2	14	73702858	1.55699e-08	73448583	73710696	54	1	1	rs78387414	1	rs78387414	intergenic	6.988	2b	ZFYVE1, RBM25, PSEN1, PAPLN	DCAF4, ZFYVE1, PSEN1	1.0311	1.9e-22	yes	rs3815460	14	73183749	74217790	0.978	0.02942	no					0.836592	1.31156e-37	0.158241	0.00516733	rs3815460	0.133858
LTL-Stroke	20	15:42086340:C:G	rs4923910	15q15.1	15	42086340	4.42826e-09	41881190	42146189	101	11	2	rs4923910;rs11070341	1	rs4923910	intronic	1.116	7	TYRO3, MGA, MAPKBP1, PLA2G4B, JMJD7, SPTBN5	NDUFAF1, LTK, RPAP1, MGA, MAPKBP1, PLA2G4B, JMJD7, SPTBN5, EHD4	1.0197	5.8e-21	yes	rs17677991	15	41798762	42214769	1.0144	0.03092	no					0.93013	8.21949e-21	0.061803	0.00806698	rs17677991	0.288159
LTL-Stroke	21	16:69364443:A:G	rs8057004	16q22.1	16	69364443	1.12903e-09	69141138	69432250	127	30	1	rs8057004	1	rs8057004	exonic	2.164	2b	HAS3, CHTF8, UTP4, SNTB2, VPS4A, COG8, PDF, NIP7, TMED6, TERF2	UTP4, SNTB2, VPS4A, COG8, PDF, NIP7, TMED6, TERF2	1.0199	3.4e-20	yes	rs3785074	16	69086332	70646213	0.9818	0.008328	no					0.911889	7.33536e-22	0.0761655	0.011946	rs3785074	0.306574
LTL-Stroke	22	16:73071381:C:T	rs34003787	16q22.3	16	73071381	1.88721e-14	73014595	73074012	9	6	3	rs34003787;rs9940520;rs9935589	1	rs34003787	intronic	12.21	4	ZFHX3	#N/A	0.9762	1.9e-11	yes	rs34003787	16	72998839	73071381	0.9344	1.673e-07	no					0.000194873	1.75418e-07	0.00123406	0.998571	rs34003787	0.999861
LTL-Stroke	23	16:74714649:C:T	rs113213273	16q23.1	16	74714649	7.20449e-09	74472123	74715714	10	3	1	rs113213273	1	rs113213273	intronic	1.565	7	GLG1, RFWD3, MLKL	MLKL	1.0311	4.1e-15	yes	rs11866592	16	74198061	74740249	1.0364	0.01068	no					0.961146	7.64175e-29	0.0328655	0.00598836	rs11866592	0.170759
LTL-Stroke	24	16:88009261:A:G	rs11646120	16q24.2	16	88009261	6.89377e-09	87984046	88117987	143	32	1	rs11646120	1	rs11646120	intronic	8.273	5	BANP	#N/A	1.0179	2e-18	yes	rs11117354	16	87974570	88202519	1.0172	0.02217	no					0.00125799	1.63472e-19	0.998736	5.76161e-06	rs11117354	0.36987
LTL-Stroke	25	17:7750847:C:T	rs2270517	17p13.1	17	7750847	3.33578e-11	7744193	7782962	17	2	1	rs2270517	1	rs2270517	intronic	0.115	5	DNAH2, KDM6B, TMEM88, NAA38, CYB5D1, CHD3	CHD3	0.9769	1.7e-22	yes	rs4724	17	7724159	8221113	1.0228	0.003282	no					0.942048	3.80266e-63	0.0502118	0.00774074	rs4724	0.554214
LTL-Stroke	26	19:4410646:A:G	rs56411083	19p13.3	19	4410646	8.01102e-10	4351652	4459748	46	22	1	rs56411083	1	rs56411083	intronic	1.015	6	STAP2, MPND, SH3GL1, CHAF1A, UBXN6	MPND, CHAF1A, UBXN6	0.9876	9e-08	yes	rs11085072	19	4351652	4459748	0.9663	1.859e-05	no					0.0631915	0.000965736	0.056048	0.878723	rs9973266	0.0892644
LTL-Stroke	27	19:22658564:G:T	rs8110674	19p12	19	22658564	1.74285e-08	22439042	22660356	312	5	2	rs1975174;rs8110674	2	rs1975174;rs8110674	intronic	0.35	6	ZNF729, ZNF98	ZNF208, ZNF257, ZNF98	1.0264	3.7e-15	yes	rs8105767	19	22076395	22722254	1.0268	0.01516	no					0.966557	1.28702e-44	0.0298294	0.00361361	rs8105767	0.999999
LTL-Stroke	28	20:62560898:C:T	rs2295436	20q13.33	20	62560898	1.21805e-10	62401898	62569982	118	21	4	rs6122179;rs4809370;rs2295436;rs6011211	2	rs6122179;rs2295436	intronic	1.774	5	ZBTB46, TPD52L2, DNAJC5, UCKL1	LIME1, ZBTB46, TPD52L2, DNAJC5, UCKL1, PRPF6, OPRL1	0.9656	2e-21	yes	rs35640778	20	61726373	62811392	1.0393	0.004469	no					0.930132	9.96003e-189	0.0566512	0.0132168	rs35640778	1
LTL-Stroke	29	22:17433210:G:T	rs4819923	22q11.1	22	17433210	1.51206e-09	17430931	17488195	27	3	3	rs4819923;rs11089387;rs5992593	1	rs4819923	intergenic	0.876	7	GAB4	#N/A	0.9812	1.5e-20	yes	rs28502153	22	17414640	17488195	0.9845	0.01959	no					0.965849	1.81726e-20	0.0276215	0.00652972	rs28502153	0.316027
LTL-Stroke	30	22:50978024:A:C	rs140521	22q13.33	22	50978024	2.106e-08	50971509	50981436	10	3	1	rs140521	1	rs140521	intergenic	5.699	NA	NCAPH2, TYMP, CIMAP1B, KLHDC7B, SYCE3	LMF2, NCAPH2, TYMP, CIMAP1B, CPT1B, CHKB, ARSA	1.0196	1.2e-18	yes	rs131794	22	50795620	51072289	1.0166	0.03379	no					0.954962	5.68217e-19	0.0353612	0.00967723	rs131794	0.289856

## Sheet: Supplementary Table 8
Supplementary Table 8. Genomic risk loci identified for single trait GWAS results of leukocyte telomere length and six cardiovascular diseases using FUMA
Note: We therefore defined the locus as 500 kb before and after the position of the index variant. Genomic risk loci association tests are two-sided and significance is determined by surpassing the genome-wide significance threshold, P < 5 x 10-8. Locus = number we assigned to a given locus; Unique SNP ID = SNP ID in format 'CHR:BP:A1_A2'; rsID = rsID of the variant; Cytoband = locus; CHR = chrom…
Trait	Locus	Unique SNP ID	rsID	Cytoband	CHR	BP	P	Start	End	nSNPs	nGWASSNPs	nIndSigSNPs	IndSigSNPs	nLeadSNPs	LeadSNPs
LTL	1	1:768253:A:C	rs2977608	1p36.33	1	768253	3e-08	706778	814371	8	1	1	rs2977608	1	rs2977608
LTL	2	1:20916238:A:G	rs66731853	1p36.12	1	20916238	1.5e-16	20884619	20994278	111	39	11	rs66731853;rs1253920;rs34918162;rs7542310;rs7542405;rs1253805;rs674187;rs2934358;rs1152991;rs2874209;rs603412	1	rs66731853
LTL	3	1:28219658:C:G	rs17185038	1p35.3	1	28219658	2.1e-10	28219658	29107863	13	3	2	rs17185038;rs76374777	2	rs17185038;rs76374777
LTL	4	1:32279629:A:G	rs6669563	1p35.2	1	32279629	2.1e-19	32267747	32315551	71	51	5	rs6669563;rs6664445;rs34572877;rs6425784;rs76482784	1	rs6669563
LTL	5	1:40035928:G:T	rs3768321	1p34.3	1	40035928	1.1e-09	39587388	40087764	145	1	1	rs3768321	1	rs3768321
LTL	6	1:41239511:A:G	rs4660456	1p34.2	1	41239511	2.8e-09	41091127	41239793	107	72	1	rs4660456	1	rs4660456
LTL	7	1:45252015:A:T	rs41269079	1p34.1	1	45252015	1.7e-09	45178412	45462256	251	16	1	rs41269079	1	rs41269079
LTL	8	1:92842367:A:C	rs139795227	1p22.1	1	92842367	6.7e-12	92315896	92925654	6	4	2	rs139795227;rs34856868	1	rs139795227
LTL	9	1:94326455:A:G	rs7555872	1p22.1	1	94326455	4.6e-08	94201057	94329282	47	2	1	rs7555872	1	rs7555872
LTL	10	1:110910397:G:T	rs4498805	1p13.3	1	110910397	5.7e-14	110802327	110986907	154	76	5	rs4498805;rs6677250;rs685711;rs488639;rs1572263	1	rs4498805
LTL	11	1:114443899:A:G	rs17464525	1p13.2	1	114443899	6.6e-36	113922338	114555118	423	261	14	rs12130763;rs74662620;rs77637424;rs1746860;rs10745340;rs1343630;rs6665194;rs17464525;rs1217444;rs7521286;rs2938330;rs4839331;rs6673273;rs870475	4	rs12130763;rs1746860;rs17464525;rs6673273
LTL	12	1:146744294:A:G	rs6685775	1q21.1	1	146744294	1.3e-13	146513378	146916713	183	89	3	rs6685775;rs72694791;rs76536568	1	rs6685775
LTL	13	1:151364199:A:G	rs61818036	1q21.3	1	151364199	2.1e-12	151364199	151449138	78	65	1	rs61818036	1	rs61818036
LTL	14	1:185315067:C:T	rs6659669	1q25.3	1	185315067	1.1e-08	185297199	185338974	24	6	1	rs6659669	1	rs6659669
LTL	15	1:226577306:C:T	rs932002	1q42.12	1	226577306	7.3e-47	226536645	226741284	269	207	16	rs932002;rs907186;rs7554919;rs71646786;rs150873355;rs4998937;rs10799355;rs898834;rs6684789;rs1151816;rs506128;rs2126332;rs4653751;rs10915985;rs7517174;rs1805414	1	rs932002
LTL	16	2:17841243:A:C	rs2555104	2p24.2	2	17841243	6.6e-12	17618105	17991974	228	116	6	rs2555104;rs35195207;rs7569030;rs2710688;rs60403576;rs2081601	2	rs2555104;rs2081601
LTL	17	2:29098543:A:T	rs56178008	2p23.2	2	29098543	9.7e-13	28968811	29180267	250	100	3	rs56178008;rs7592895;rs4558548	1	rs56178008
LTL	18	2:43588302:C:T	rs6751209	2p21	2	43588302	1.6e-08	43542480	43614036	48	8	1	rs6751209	1	rs6751209
LTL	19	2:54473046:C:T	rs965109	2p16.2	2	54473046	1.8e-55	53704374	54820213	570	399	30	rs116811976;rs766075;rs74905718;rs77876998;rs144547368;rs843673;rs78242000;rs965109;rs114772306;rs74412974;rs114062616;rs116699466;rs724387;rs36020289;rs7567225;rs80189665;rs74693460;rs10186140;rs13404903;rs115770153;rs12615793;rs843740;rs13023335;rs74376971;rs72800752;rs55993481;rs17045684;rs13412139;rs843701;rs71413265	6	rs116811976;rs766075;rs965109;rs12615793;rs843701;rs71413265
LTL	20	2:58984109:C:T	rs12613375	2p16.1	2	58984109	9.1e-10	58920057	59035386	33	14	1	rs12613375	1	rs12613375
LTL	21	2:210673445:C:T	rs17803849	2q34	2	210673445	4.2e-41	210043728	210836323	507	126	22	rs1396777;rs145124274;rs3768812;rs10804177;rs62215013;rs62201601;rs16842765;rs10192555;rs148974698;rs288064;rs17803849;rs78739800;rs112017087;rs73986423;rs7608462;rs13026110;rs876010;rs17733579;rs2663652;rs78969942;rs116078332;rs2370830	2	rs1396777;rs17803849
LTL	22	2:216220870:G:T	rs35671754	2q35	2	216220870	1.4e-08	216162062	216232108	48	4	1	rs35671754	1	rs35671754
LTL	23	3:24347800:C:T	rs869785	3p24.2	3	24347800	4.4e-12	24334511	24357243	16	8	2	rs869785;rs55918441	1	rs869785
LTL	24	3:47881942:C:T	rs145943094	3p21.31	3	47881942	6.8e-13	47183356	48747279	27	14	2	rs145943094;rs149636734	1	rs145943094
LTL	25	3:49949834:A:T	rs7634084	3p21.31	3	49949834	3.6e-15	49385350	50250837	534	290	6	rs7634084;rs6808044;rs13100903;rs2624839;rs3774751;rs2172252	1	rs7634084
LTL	26	3:72777558:A:C	rs138477976	3p13	3	72777558	6.1e-19	72777558	72924570	5	1	1	rs138477976	1	rs138477976
LTL	27	3:101267385:C:T	rs13062095	3q12.3	3	101267385	9.7e-11	101011537	101306098	449	67	2	rs13062095;rs12630796	1	rs13062095
LTL	28	3:128215821:A:G	rs6776756	3q21.3	3	128215821	1.1e-17	128197282	128425253	256	187	12	rs6776756;rs59855017;rs2713579;rs1986452;rs11712335;rs2811491;rs9838579;rs12629965;rs2713575;rs62273237;rs9289330;rs34762068	2	rs6776756;rs2811491
LTL	29	3:138244400:C:T	rs9878436	3q22.3	3	138244400	1.2e-12	138133682	138640704	485	322	4	rs9878436;rs11713049;rs9828304;rs7624365	1	rs9878436
LTL	30	3:160137748:A:T	rs73154592	3q25.33	3	160137748	2.9e-18	159922979	160401080	381	234	7	rs73154592;rs1369666;rs60028768;rs4679656;rs9822982;rs11711894;rs11709336	1	rs73154592
LTL	31	3:169477506:A:G	rs12638862	3q26.2	3	169477506	1.4e-306	169182961	170281322	1016	655	82	rs139897613;rs16854211;rs11708171;rs78141025;rs111550694;rs138358992;rs1920117;rs117955747;rs73043906;rs150501030;rs6808181;rs62294349;rs16854114;rs35728955;rs1895031;rs4955666;rs11709683;rs4955573;rs9864212;rs7644900;rs1881985;rs56194506;rs140833063;rs183799451;rs115475603;rs79127610;rs79683019;rs115833500;rs67883078;rs55981864;rs114865682;rs116674307;rs75130944;rs79253753;rs74655960;rs77395532;…	26	rs139897613;rs11708171;rs78141025;rs35728955;rs7644900;rs140833063;rs79127610;rs79683019;rs115833500;rs55981864;rs114865682;rs75130944;rs12638862;rs2068178;rs76094497;rs35221505;rs59273133;rs146546514;rs34288366;rs7621860;rs79805129;rs1290670;rs138017839;rs2160901;rs75544730;rs6790988
LTL	32	3:197685493:A:G	rs7374500	3q29	3	197685493	1.5e-10	197622400	197751147	34	7	1	rs7374500	1	rs7374500
LTL	33	4:2255063:A:G	rs2282764	4p16.3	4	2255063	9.3e-15	2065373	2267566	345	259	4	rs2282764;rs7442487;rs428361;rs2857788	1	rs2282764
LTL	34	4:7044380:C:T	rs871134	4p16.1	4	7044380	1.7e-19	6913707	7109083	186	92	11	rs871134;rs6842659;rs11931598;rs35842300;rs4689592;rs3857185;rs12649919;rs4234787;rs12648134;rs13134529;rs6850544	1	rs871134
LTL	35	4:9926967:G:T	rs13129697	4p16.1	4	9926967	1.5e-14	9920347	10381329	224	65	5	rs13129697;rs3775949;rs7669607;rs10018666;rs10805346	1	rs13129697
LTL	36	4:48843372:A:G	rs4695407	4p11	4	48843372	1.5e-12	48466781	48925948	222	159	1	rs4695407	1	rs4695407
LTL	37	4:122781402:C:T	rs10024820	4q27	4	122781402	2.1e-12	122660250	122846028	146	80	2	rs7687226;rs10024820	2	rs7687226;rs10024820
LTL	38	4:164028105:A:G	rs6536702	4q32.2	4	164028105	9.4e-111	164001188	164262654	442	292	23	rs2320303;rs1382662;rs4435699;rs72631678;rs17574736;rs6536702;rs4538435;rs13149471;rs139281320;rs6823492;rs1479091;rs62335076;rs4271963;rs6536720;rs62335064;rs79869990;rs9990898;rs145074693;rs79280861;rs140979911;rs11730501;rs7688369;rs148349487	7	rs2320303;rs17574736;rs6536702;rs62335064;rs9990898;rs11730501;rs148349487
LTL	39	5:76284:C:T	rs11746381	5p15.33	5	76284	1.9e-14	21182	344491	58	29	2	rs11746381;rs76258839	1	rs11746381
LTL	40	5:1285974:A:C	rs7705526	5p15.33	5	1285974	2.4e-282	1100831	1679863	689	385	93	rs13181874;rs71593392;rs76067074;rs62331283;rs4975623;rs74581452;rs34041736;rs33977403;rs11744165;rs11133695;rs7730878;rs112333466;rs35535053;rs12187821;rs11133715;rs2075786;rs11742908;rs10078761;rs145685051;rs2075785;rs35241335;rs2736109;rs3888705;rs62329683;rs13174814;rs506156;rs72713502;rs4975539;rs35041195;rs3891054;rs13167280;rs7734992;rs6420019;rs35029535;rs115251750;rs35247701;rs7713218;rs…	32	rs13181874;rs71593392;rs62331283;rs4975623;rs112333466;rs35535053;rs11133715;rs145685051;rs2075785;rs13167280;rs6420019;rs7705526;rs62332583;rs2736098;rs61748181;rs34685900;rs33987166;rs112401627;rs78340245;rs4635969;rs35561057;rs13163340;rs62329730;rs34632076;rs10866501;rs75919021;rs28363089;rs2963238;rs116464884;rs56083971;rs4975679;rs77135711
LTL	41	5:78954121:A:T	rs6873104	5q14.1	5	78954121	2.6e-13	78904697	78981550	156	110	2	rs6873104;rs7712162	1	rs6873104
LTL	42	5:132444128:A:G	rs72801474	5q31.1	5	132444128	3.9e-09	132349654	132467373	7	2	1	rs72801474	1	rs72801474
LTL	43	5:138942349:A:G	rs11745986	5q31.2	5	138942349	1.8e-17	138911593	139060486	74	56	2	rs11745986;rs356445	1	rs11745986
LTL	44	6:204031:A:G	rs80324517	6p25.3	6	204031	1.8e-17	202076	219474	21	16	4	rs80324517;rs12212152;rs11961507;rs72833501	1	rs80324517
LTL	45	6:25874423:A:G	rs13198474	6p22.2	6	25874423	1.5e-19	24988105	29612325	3175	2226	76	rs13198474;rs34391493;rs1935234;rs7749823;rs1883215;rs9379850;rs34565965;rs58825580;rs9393716;rs6941920;rs1104871;rs303003;rs302972;rs10498722;rs2690121;rs2744301;rs9366622;rs4712936;rs722086;rs13212936;rs2328893;rs1892252;rs1324088;rs1165165;rs7755997;rs12207992;rs12190473;rs9461335;rs911186;rs1102565;rs6938200;rs9393801;rs34613987;rs9366697;rs9295740;rs9461407;rs200964;rs149878;rs735765;rs17368…	7	rs13198474;rs7755997;rs34613987;rs3130750;rs1419636;rs3117194;rs3095268
LTL	46	6:109601684:C:T	rs9372209	6q21	6	109601684	9.5e-13	109505740	109651220	341	212	3	rs9372209;rs6903519;rs111762044	1	rs9372209
LTL	47	7:56490:C:T	rs76646179	7p22.3	7	56490	2.2e-16	42694	76035	55	39	2	rs76646179;rs4281072	1	rs76646179
LTL	48	7:23930316:C:T	rs13230646	7p15.3	7	23930316	8.9e-14	23493613	23932748	315	156	12	rs6969275;rs11771195;rs7793777;rs76365198;rs116981;rs2058995;rs4722260;rs6963050;rs13230646;rs17779517;rs6461724;rs7787617	2	rs6969275;rs13230646
LTL	49	7:50257703:A:T	rs11769630	7p12.2	7	50257703	4.3e-11	50257703	50331256	11	7	2	rs11769630;rs2366034	2	rs11769630;rs2366034
LTL	50	7:76390970:C:T	rs38664	7q11.23	7	76390970	3e-09	76047900	76390970	255	6	2	rs38664;rs35029472	1	rs38664
LTL	51	7:99780283:A:G	rs2056726	7q22.1	7	99780283	7.9e-21	99699436	100111776	281	184	5	rs2056726;rs2950518;rs141376982;rs6948685;rs4469386	1	rs2056726
LTL	52	7:123408050:A:G	rs600420	7q31.32	7	123408050	1.6e-10	123260773	123442702	197	14	2	rs600420;rs665867	1	rs600420
LTL	53	7:124459852:C:T	rs7790856	7q31.33	7	124459852	1.8e-87	124157107	124928978	1274	915	39	rs6466936;rs13228817;rs1608704;rs1983457;rs978544;rs67536923;rs4731203;rs2107930;rs2284214;rs33935352;rs4728006;rs6968500;rs4731206;rs3735270;rs77747224;rs13234634;rs191495185;rs7790856;rs56122728;rs597279;rs12056290;rs632459;rs702427;rs1427579;rs17148097;rs11542914;rs145125799;rs75358947;rs150173581;rs75561961;rs2190105;rs73225447;rs73225478;rs111376476;rs62638681;rs73227525;rs117630647;rs802996…	11	rs6466936;rs4731206;rs191495185;rs7790856;rs145125799;rs75358947;rs150173581;rs75561961;rs73225447;rs73227525;rs117630647
LTL	54	7:128576086:C:T	rs3757387	7q32.1	7	128576086	8.2e-24	128562578	128710988	158	131	9	rs3757387;rs4728144;rs59147352;rs4731541;rs3807301;rs2242028;rs4731531;rs1874330;rs3757388	1	rs3757387
LTL	55	7:129663496:C:T	rs11556924	7q32.2	7	129663496	6.8e-10	129663496	129685597	2	2	1	rs11556924	1	rs11556924
LTL	56	7:159100287:A:C	rs7456670	7q36.3	7	159100287	8e-24	158406391	159128550	584	129	5	rs117469989;rs75369875;rs138061125;rs7456670;rs430860	3	rs117469989;rs138061125;rs7456670
LTL	57	8:21846586:C:G	rs2306646	8p21.3	8	21846586	3.3e-25	21770372	21900757	153	124	10	rs2306646;rs67385415;rs7813420;rs4872220;rs11776272;rs7813392;rs900779;rs4872083;rs10089142;rs7818819	2	rs2306646;rs10089142
LTL	58	8:48885436:A:T	rs762679	8q11.21	8	48885436	1.4e-27	46904029	49037652	603	290	9	rs75287549;rs7846620;rs4873292;rs139663142;rs62539106;rs762679;rs72633937;rs2632503;rs4873772	2	rs75287549;rs762679
LTL	59	8:56667645:C:G	rs10808899	8q11.22	8	56667645	3.1e-21	56647919	57264456	169	116	4	rs10808899;rs10087887;rs4737427;rs1823504	1	rs10808899
LTL	60	8:70964743:A:G	rs7012816	8q13.3	8	70964743	3e-09	70943083	70980738	12	5	1	rs7012816	1	rs7012816
LTL	61	8:73958718:A:G	rs10112752	8q21.11	8	73958718	9.5e-46	73840613	74035118	197	150	14	rs118021294;rs17209700;rs10283250;rs10112752;rs118030311;rs10957637;rs9721375;rs56780268;rs10957634;rs6472716;rs2981089;rs10095169;rs4007414;rs10087744	3	rs118021294;rs10112752;rs4007414
LTL	62	8:95530969:A:G	rs1023767	8q22.1	8	95530969	5e-15	95330332	95637940	351	238	5	rs1023767;rs3096601;rs72674898;rs12680342;rs2930971	1	rs1023767
LTL	63	9:826585:C:G	rs4742448	9p24.3	9	826585	6.4e-14	809598	863864	82	34	3	rs4742448;rs13295838;rs4742493	1	rs4742448
LTL	64	9:34107505:C:T	rs11557154	9p13.3	9	34107505	1.1e-30	33758674	34149119	258	156	12	rs13290822;rs16935971;rs2781;rs12001437;rs10814068;rs11557154;rs10971942;rs62560870;rs112987610;rs55660804;rs62558859;rs10758240	2	rs13290822;rs11557154
LTL	65	9:109639970:C:T	rs4743037	9q31.2	9	109639970	5.1e-10	109554690	109670016	72	14	2	rs4743037;rs954585	1	rs4743037
LTL	66	10:5870267:G:T	rs10905255	10p15.1	10	5870267	2.6e-19	5701622	5874958	247	103	10	rs10905255;rs12248979;rs10796180;rs10796202;rs55913768;rs3209286;rs10737018;rs4748916;rs10795544;rs11596435	1	rs10905255
LTL	67	10:94460687:C:G	rs10882100	10q23.33	10	94460687	1.4e-08	94336963	94495241	71	8	1	rs10882100	1	rs10882100
LTL	68	10:96114835:A:G	rs12572897	10q23.33	10	96114835	3.6e-27	95958289	96757047	311	205	8	rs12572897;rs35765566;rs7099229;rs1409657;rs2104543;rs58002961;rs10882411;rs60341058	1	rs12572897
LTL	69	10:101276256:A:G	rs12412214	10q24.2	10	101276256	3.4e-28	101271789	101589328	391	236	12	rs12412214;rs10883361;rs4919345;rs989979;rs1360522;rs12573067;rs911541;rs11190168;rs11190184;rs1541598;rs7914602;rs1929934	3	rs12412214;rs12573067;rs11190184
LTL	70	10:103894939:A:C	rs4919611	10q24.32	10	103894939	5.1e-16	103562838	104197327	57	27	6	rs4919611;rs118161359;rs7900590;rs142145589;rs67771234;rs2786846	1	rs4919611
LTL	71	10:105675946:C:T	rs9419958	10q24.33	10	105675946	2.6e-167	105464082	106328016	714	370	55	rs2047036;rs6584568;rs1015037;rs958763;rs7919263;rs58512942;rs12777678;rs11191820;rs11191842;rs728713;rs7922930;rs4540778;rs35339759;rs34178838;rs12778775;rs79453661;rs4918069;rs11191865;rs11814244;rs35691152;rs61863693;rs7073079;rs879544;rs4918054;rs2902637;rs78264314;rs73340551;rs11191835;rs10748858;rs61861110;rs34547036;rs9419958;rs74154705;rs11597027;rs77013742;rs58903224;rs12354909;rs7741016…	14	rs2047036;rs12777678;rs728713;rs79453661;rs10748858;rs9419958;rs4918073;rs111912365;rs12761815;rs10883969;rs10883994;rs2183509;rs12269707;rs1577227
LTL	72	11:202253:A:G	rs939916	11p15.5	11	202253	6.6e-29	176442	270514	91	37	9	rs75155656;rs10081;rs1212931;rs3741411;rs939916;rs939917;rs4758633;rs10902108;rs2272566	2	rs75155656;rs939916
LTL	73	11:5247141:A:G	rs1609812	11p15.4	11	5247141	3.9e-65	4665613	5248641	164	113	12	rs10768147;rs1609812;rs12787372;rs6578581;rs10742573;rs12795026;rs78686564;rs11036225;rs10742579;rs34220818;rs7936332;rs12574989	2	rs10768147;rs1609812
LTL	74	11:9629553:C:G	rs10840270	11p15.4	11	9629553	1.3e-11	9559222	9707150	113	22	4	rs79189709;rs10840270;rs7939541;rs11042436	2	rs79189709;rs10840270
LTL	75	11:47440758:A:G	rs2293579	11p11.2	11	47440758	3.3e-10	47377283	47883337	73	18	1	rs2293579	1	rs2293579
LTL	76	11:49359606:A:G	rs1917328	11p11.12	11	49359606	6.1e-09	49111407	49876651	119	10	1	rs1917328	1	rs1917328
LTL	77	11:108177097:A:T	rs611646	11q22.3	11	108177097	3.5e-73	107844790	108439087	692	456	31	rs111306595;rs12575489;rs4312032;rs77140412;rs77634556;rs3741054;rs227061;rs144267602;rs2640771;rs34052882;rs11212592;rs11212510;rs12226047;rs141379009;rs17503908;rs111559044;rs189426461;rs79710561;rs611646;rs146935358;rs2846414;rs2640753;rs11212525;rs61913702;rs611018;rs78208981;rs191146538;rs2355838;rs11212631;rs34762648;rs7943820	8	rs111306595;rs34052882;rs141379009;rs611646;rs611018;rs191146538;rs11212631;rs7943820
LTL	78	11:128500215:A:G	rs6590343	11q24.3	11	128500215	1.5e-09	128499000	128504173	6	4	1	rs6590343	1	rs6590343
LTL	79	12:11757743:A:G	rs10845387	12p13.2	12	11757743	1.5e-11	11757743	11757743	1	1	1	rs10845387	1	rs10845387
LTL	80	12:24762109:C:T	rs12369950	12p12.1	12	24762109	8e-10	24744105	24822366	52	10	1	rs12369950	1	rs12369950
LTL	81	12:54698408:A:G	rs79755767	12q13.13	12	54698408	4.8e-16	54596827	54749193	46	23	3	rs79755767;rs58905411;rs113463590	1	rs79755767
LTL	82	12:57082058:A:G	rs17445108	12q13.3	12	57082058	2e-08	57082058	57082058	1	1	1	rs17445108	1	rs17445108
LTL	83	12:88955469:A:G	rs1907702	12q21.32	12	88955469	5.9e-10	88847001	89015821	74	53	1	rs1907702	1	rs1907702
LTL	84	12:111910219:A:G	rs10774625	12q24.12	12	111910219	1.7e-15	111818487	112939853	543	196	5	rs10774625;rs648997;rs659964;rs10849941;rs11065898	1	rs10774625
LTL	85	12:120904895:C:T	rs76666449	12q24.31	12	120904895	8.2e-19	120839217	121090195	104	82	4	rs76666449;rs16950305;rs76841017;rs117064354	1	rs76666449
LTL	86	12:123650335:C:T	rs1615350	12q24.31	12	123650335	8.4e-18	122803643	123932679	758	515	14	rs10773176;rs6489056;rs147730268;rs10847242;rs2245199;rs1615350;rs10773000;rs2030401;rs28377694;rs28478828;rs35416759;rs7132277;rs1727326;rs1716162	2	rs10773176;rs1615350
LTL	87	12:133055192:G:T	rs11147167	12q24.33	12	133055192	6e-09	133047900	133072363	13	3	1	rs11147167	1	rs11147167
LTL	88	13:41695100:A:G	rs1332941	13q14.11	13	41695100	5.9e-21	41691236	41772319	72	61	5	rs1332941;rs9525453;rs117056888;rs28634825;rs7984569	1	rs1332941
LTL	89	13:71236611:A:T	rs670180	13q21.33	13	71236611	1.2e-08	71236607	71236611	2	2	1	rs670180	1	rs670180
LTL	90	13:73317585:C:T	rs9600019	13q21.33	13	73317585	2.4e-09	73311008	73624100	91	62	2	rs9600019;rs9573088	1	rs9600019
LTL	91	14:20812951:A:G	rs3093888	14q11.2	14	20812951	1.5e-10	20737461	20831794	11	4	1	rs3093888	1	rs3093888
LTL	92	14:21941148:C:T	rs73581419	14q11.2	14	21941148	1.3e-12	21921380	21982353	70	47	4	rs73581419;rs9322989;rs10483252;rs10145520	1	rs73581419
LTL	93	14:23483522:C:T	rs10150625	14q11.2	14	23483522	1.3e-08	23482404	23507554	13	5	2	rs10150625;rs113525195	1	rs10150625
LTL	94	14:65543102:C:T	rs45604339	14q23.3	14	65543102	4.3e-22	64846224	65628009	331	185	13	rs117363933;rs17824845;rs1256145;rs111372722;rs61160081;rs34677431;rs4902355;rs11622366;rs7147987;rs4902352;rs45604339;rs12883529;rs11627485	4	rs117363933;rs17824845;rs111372722;rs45604339
LTL	95	14:73422259:C:G	rs3815460	14q24.2	14	73422259	5.2e-43	73183749	74217790	827	415	40	rs2215590;rs59084020;rs6574100;rs982972;rs17182027;rs10459542;rs6574106;rs11622784;rs2240980;rs7142642;rs6420906;rs79442944;rs76893196;rs1468662;rs3815460;rs12436416;rs61986507;rs4903092;rs77302987;rs79252115;rs8009347;rs148897606;rs78387414;rs140504149;rs76322163;rs8007376;rs3814865;rs76201553;rs2806044;rs1007934;rs2806047;rs2058091;rs10148039;rs17180949;rs3742833;rs765942;rs183706774;rs909216;r…	8	rs2215590;rs6420906;rs3815460;rs1007934;rs183706774;rs909216;rs8016921;rs147204878
LTL	96	14:91927521:G:T	rs8006485	14q32.12	14	91927521	1.2e-21	91836982	92099719	423	292	10	rs8006485;rs8017981;rs11160016;rs1624287;rs1704662;rs1704649;rs17725366;rs61988444;rs11621425;rs61990487	1	rs8006485
LTL	97	14:96181360:A:T	rs1957937	14q32.13	14	96181360	1.9e-14	96166509	96228799	68	34	3	rs1957937;rs2887453;rs11849538	1	rs1957937
LTL	98	14:96997548:C:T	rs61368673	14q32.2	14	96997548	4.5e-08	96945500	97046474	45	2	1	rs61368673	1	rs61368673
LTL	99	15:42032383:C:G	rs17677991	15q15.1	15	42032383	4.4e-26	41798762	42214769	328	196	20	rs17677991;rs11637616;rs890507;rs1456235;rs8028958;rs12593397;rs1672461;rs4924588;rs62002149;rs3759793;rs1200345;rs28508151;rs4924559;rs4924560;rs11070341;rs58644077;rs28682886;rs2009310;rs9919992;rs28627803	3	rs17677991;rs9919992;rs28627803
LTL	100	15:50369375:A:G	rs41362650	15q21.2	15	50369375	3.6e-45	50195949	50797021	344	207	31	rs12442538;rs10519249;rs2414006;rs12101762;rs2414016;rs11632390;rs2414020;rs11631433;rs35507379;rs7179848;rs8038516;rs36025803;rs41362650;rs11070747;rs7170947;rs4143837;rs725530;rs8038609;rs35334250;rs61214575;rs12438280;rs2278167;rs1365508;rs35609972;rs8031802;rs2899453;rs7168944;rs77748036;rs2414039;rs7167956;rs7170543	6	rs12442538;rs41362650;rs7168944;rs77748036;rs2414039;rs7170543
LTL	101	15:56774018:A:C	rs1980240	15q21.2	15	56774018	2.2e-10	55941286	56784345	259	79	3	rs10851590;rs1980240;rs2465973	2	rs10851590;rs1980240
LTL	102	15:65116390:A:C	rs75683534	15q22.31	15	65116390	4.4e-09	65116390	65116390	1	1	1	rs75683534	1	rs75683534
LTL	103	15:74336633:C:T	rs5742915	15q24.1	15	74336633	1.6e-21	74248477	74354152	49	13	4	rs5742915;rs7180506;rs4886868;rs12917449	1	rs5742915
LTL	104	16:3650987:C:T	rs113490934	16p13.3	16	3650987	3.2e-17	3545364	3755986	253	212	4	rs113490934;rs4785938;rs56205903;rs3751836	1	rs113490934
LTL	105	16:9073060:C:T	rs11646283	16p13.2	16	9073060	5.3e-14	8969083	9101544	107	59	7	rs11646283;rs17652097;rs254953;rs2447915;rs17680522;rs146115155;rs12932179	1	rs11646283
LTL	106	16:14545264:C:T	rs8051249		16	14545264	2.1e-08	14531146	14697698	19	3	1	rs8051249	1	rs8051249
LTL	107	16:28340945:A:G	rs12598357	16p12.1	16	28340945	4.2e-08	28338039	28895130	302	1	1	rs12598357	1	rs12598357
LTL	108	16:48390512:G:T	rs8053839		16	48390512	1e-11	48235577	48466286	168	119	5	rs8053839;rs9929978;rs111950327;rs11646850;rs12446160	1	rs8053839
LTL	109	16:50188929:A:G	rs76219171	16q12.1	16	50188929	7.8e-17	49999202	50280364	319	184	11	rs12918457;rs7198659;rs12923319;rs11646815;rs3887556;rs12935209;rs34397078;rs78162647;rs7498231;rs28881322;rs76219171	2	rs12918457;rs76219171
LTL	110	16:67617186:A:G	rs28711261	16q22.1	16	67617186	1.6e-08	67446037	67675409	39	1	1	rs28711261	1	rs28711261
LTL	111	16:69406986:A:G	rs3785074	16q22.1	16	69406986	2.6e-27	69086332	70646213	987	448	16	rs3785074;rs35808095;rs12929706;rs35857733;rs1424114;rs9924894;rs2362643;rs12708902;rs2549097;rs3859068;rs1979595;rs72785073;rs72790692;rs6416698;rs12447090;rs7190039	4	rs3785074;rs2362643;rs72785073;rs72790692
LTL	112	16:73071381:C:T	rs34003787	16q22.3	16	73071381	1.9e-11	72998839	73071381	10	9	3	rs34003787;rs80348302;rs9935589	1	rs34003787
LTL	113	16:74654396:A:G	rs11866592		16	74654396	1.3e-33	74198061	74740249	369	224	23	rs183553155;rs11866592;rs111667788;rs111911076;rs7191665;rs80186348;rs9938096;rs17334975;rs113875053;rs143068306;rs28607667;rs141188065;rs111428428;rs3935784;rs62053580;rs76333498;rs1424083;rs79193356;rs3815826;rs7359422;rs4411525;rs4500770;rs2002756	4	rs183553155;rs11866592;rs62053580;rs2002756
LTL	114	16:82203758:C:T	rs2303262	16q23.3	16	82203758	2.9e-85	82055227	82397505	582	397	15	rs76320709;rs12928375;rs75010776;rs9925283;rs11642453;rs7196560;rs918759;rs1862819;rs8051215;rs151270783;rs2303262;rs4143216;rs35812977;rs116915151;rs6565010	7	rs76320709;rs75010776;rs9925283;rs151270783;rs2303262;rs116915151;rs6565010
LTL	115	16:88092092:C:T	rs11117354		16	88092092	3.4e-26	87974570	88202519	405	284	14	rs9922264;rs7404513;rs72631417;rs12922388;rs11117312;rs8057774;rs4843783;rs12933708;rs117447772;rs11117354;rs4843787;rs35216338;rs11642754;rs7498330	4	rs9922264;rs8057774;rs11117354;rs35216338
LTL	116	16:90141355:A:C	rs12925933		16	90141355	7e-12	90109144	90172495	41	16	4	rs12925933;rs34101249;rs11648775;rs4493039	1	rs12925933
LTL	117	17:1694247:C:T	rs7218033		17	1694247	1e-22	1660801	2584946	325	201	13	rs7218033;rs55830403;rs17291738;rs11655454;rs2287321;rs8075977;rs72822441;rs5030755;rs2020976;rs4362428;rs12451892;rs113800756;rs9908744	4	rs7218033;rs5030755;rs4362428;rs113800756
LTL	118	17:7760397:A:G	rs4724		17	7760397	9.8e-69	7724159	8221113	376	229	20	rs4130668;rs4724;rs4290529;rs60712401;rs75678869;rs62062552;rs185225460;rs7406485;rs57985356;rs144885000;rs78363053;rs62637606;rs59922886;rs35217368;rs139507809;rs1861956;rs8077788;rs1476161;rs10221204;rs12938531	4	rs4130668;rs4724;rs78363053;rs59922886
LTL	119	17:29252703:C:T	rs111527438	17q11.2	17	29252703	3.1e-09	28978168	29252703	16	4	2	rs111527438;rs4795568	1	rs111527438
LTL	120	17:41448228:A:G	rs12941945	17q21.31	17	41448228	3e-22	41085683	41469457	675	449	10	rs140239793;rs35310982;rs34778048;rs3737559;rs72831095;rs112381903;rs12941945;rs58858902;rs62076368;rs11656843	4	rs140239793;rs35310982;rs72831095;rs12941945
LTL	121	17:65705530:A:G	rs7209057		17	65705530	5.7e-09	65684452	65754005	30	7	2	rs7209057;rs2286918	1	rs7209057
LTL	122	17:74001106:A:G	rs2069536	17q25.1	17	74001106	1.8e-10	73826406	74025656	58	15	2	rs2069536;rs11077798	1	rs2069536
LTL	123	17:76183233:C:T	rs144204502	17q25.3	17	76183233	3.4e-28	76150396	76253723	84	39	10	rs12232476;rs7221585;rs4583318;rs144204502;rs34862175;rs115972938;rs11868325;rs112625468;rs6501182;rs8077673	3	rs12232476;rs144204502;rs112625468
LTL	124	18:658423:A:G	rs3891167	18p11.32	18	658423	1.2e-70	641024	847479	207	83	24	rs2606241;rs2612095;rs8088781;rs12958089;rs7504637;rs12955086;rs1456334;rs11664283;rs9967368;rs9952504;rs28602966;rs3891167;rs2606246;rs116911862;rs111811424;rs150150565;rs116863223;rs4474771;rs7236459;rs2847333;rs62089261;rs76883411;rs117962821;rs12373375	8	rs2606241;rs9952504;rs3891167;rs111811424;rs2847333;rs76883411;rs117962821;rs12373375
LTL	125	18:42151261:C:T	rs8088824	18q12.3	18	42151261	8.1e-28	41816365	42299345	394	311	18	rs117632747;rs16978051;rs117598048;rs143134766;rs11873039;rs117227661;rs79824385;rs16978074;rs35417915;rs10468855;rs8088824;rs137854969;rs72903593;rs4890487;rs2852772;rs28481848;rs8093990;rs2614985	4	rs117632747;rs79824385;rs8088824;rs2614985
LTL	126	18:51798047:C:G	rs2276182	18q21.2	18	51798047	2.8e-30	51640653	52468402	471	200	13	rs2276182;rs17470798;rs7240534;rs8090211;rs9304460;rs588705;rs8093601;rs4940320;rs3018199;rs72927099;rs3218784;rs116843549;rs1833293	3	rs2276182;rs3218784;rs1833293
LTL	127	18:74691225:A:G	rs6565924		18	74691225	2.9e-10	74619652	74697894	52	22	1	rs6565924	1	rs6565924
LTL	128	18:77984604:C:T	rs9675571	18q23	18	77984604	6.5e-10	77867027	78015057	57	6	2	rs9675571;rs7229457	1	rs9675571
LTL	129	19:4368142:C:T	rs11085072	19p13.3	19	4368142	2.6e-08	4351652	4459748	46	5	1	rs11085072	1	rs11085072
LTL	130	19:13220703:C:G	rs35601737	19p13.13	19	13220703	1.9e-10	13220703	13220703	1	1	1	rs35601737	1	rs35601737
LTL	131	19:22215441:A:G	rs8105767	19p12	19	22215441	2.5e-50	22076395	22722254	1333	890	26	rs138940550;rs142230144;rs8105767;rs62110991;rs3813591;rs2522317;rs62119972;rs283147;rs2023338;rs283163;rs808373;rs4932992;rs1987409;rs73924026;rs145569962;rs17701615;rs56061708;rs11085508;rs77923659;rs8182543;rs117692222;rs118031482;rs58038983;rs57590977;rs12609595;rs12104137	4	rs138940550;rs8105767;rs77923659;rs58038983
LTL	132	19:33752994:G:T	rs4530278	19q13.11	19	33752994	1.5e-11	33730893	33756377	26	18	5	rs79407714;rs7255661;rs11668482;rs12462575;rs4530278	3	rs79407714;rs11668482;rs4530278
LTL	133	19:45411941:C:T	rs429358	19q13.32	19	45411941	3.8e-10	45392254	45424351	14	4	1	rs429358	1	rs429358
LTL	134	19:56733425:A:C	rs34187696	19q13.43	19	56733425	1.2e-08	56733425	56733425	1	1	1	rs34187696	1	rs34187696
LTL	135	19:57370055:A:G	rs8102497		19	57370055	1.4e-13	57271005	57370055	41	17	2	rs8102497;rs12459880	1	rs8102497
LTL	136	20:66370:A:G	rs6054257		20	66370	1.1e-08	61098	67500	5	2	1	rs6054257	1	rs6054257
LTL	137	20:35525640:A:C	rs1291143	20q11.23	20	35525640	1.8e-69	35072641	35906537	534	357	29	rs6028465;rs1146258;rs1291114;rs1291143;rs147054904;rs1891643;rs4810368;rs6130361;rs6017041;rs6031277;rs1632294;rs2050091;rs1534971;rs1534973;rs6124738;rs1291132;rs6030417;rs6016882;rs117667191;rs145011414;rs1935920;rs17722686;rs111464773;rs4812768;rs6031585;rs3748462;rs6072798;rs76848807;rs6017596	7	rs6028465;rs1291143;rs6030417;rs17722686;rs111464773;rs76848807;rs6017596
LTL	138	20:62321128:A:G	rs35640778	20q13.33	20	62321128	9.6e-195	61726373	62811392	1292	741	97	rs13045471;rs6089904;rs41298344;rs113504041;rs310617;rs310619;rs910948;rs13036739;rs969635;rs13039831;rs55845303;rs1555338;rs34528028;rs310656;rs6122476;rs3810480;rs310630;rs2777940;rs310632;rs6011905;rs310670;rs766915;rs76257944;rs73920908;rs310629;rs16983844;rs381331;rs453481;rs909334;rs77993536;rs34538116;rs8114049;rs3208008;rs11697497;rs55886426;rs3810491;rs3746346;rs117265989;rs114601310;rs2…	25	rs13045471;rs113504041;rs310617;rs1555338;rs310656;rs6122476;rs3810480;rs310632;rs16983844;rs114601310;rs2259797;rs75451331;rs35640778;rs6062496;rs74552928;rs932826;rs6010653;rs189423538;rs78701368;rs6090007;rs4809369;rs11556473;rs41278204;rs7000;rs817330
LTL	139	22:17469049:A:C	rs28502153		22	17469049	1.2e-25	17414640	17488195	65	57	8	rs8137298;rs57129060;rs5992593;rs2385786;rs5994109;rs28502153;rs9605181;rs5992600	2	rs8137298;rs28502153
LTL	140	22:45790132:C:T	rs6007020	22q13.31	22	45790132	4.8e-12	45729382	45813890	112	40	1	rs6007020	1	rs6007020
LTL	141	22:50971752:A:C	rs131794	22q13.33	22	50971752	8e-24	50795620	51072289	132	91	18	rs131794;rs131792;rs470118;rs131787;rs131781;rs738938;rs131778;rs131758;rs140514;rs7284429;rs762669;rs128941;rs131822;rs140522;rs118119439;rs131742;rs5770797;rs1003322	4	rs131794;rs118119439;rs131742;rs1003322
AF	14	2:61470126:C:T	rs11125871	2p15	2	61470126	6.416e-09	61364154	61851845	317	123	2	rs11125871;rs6733446	1	rs11125871
AF	15	2:65284231:A:T	rs2540949	2p14	2	65284231	2.949e-22	65235333	65386462	149	106	6	rs2540949;rs3732096;rs4671117;rs2540970;rs2723075;rs12990465	1	rs2540949
AF	16	2:70106832:C:T	rs6747542	2p13.3	2	70106832	1.096e-16	69905400	70175327	275	213	5	rs6747542;rs2124007;rs7569566;rs6546541;rs62133983	1	rs6747542
AF	17	2:86594487:A:G	rs72926475	2p11.2	2	86594487	2.372e-11	86351608	86855698	176	34	3	rs72926475;rs13387570;rs150649551	1	rs72926475
AF	18	2:127433465:C:T	rs28387148	2q14.3	2	127433465	6.251e-11	127421622	127437904	15	10	1	rs28387148	1	rs28387148
AF	19	2:145760353:C:G	rs67969609	2q22.3	2	145760353	1.712e-08	145639577	145827817	40	16	2	rs67969609;rs11689317	1	rs67969609
AF	20	2:175555714:C:T	rs56181519	2q31.1	2	175555714	6.463e-18	175200903	175558804	91	47	7	rs66772332;rs17507821;rs2358889;rs13414978;rs56181519;rs6759870;rs7574892	3	rs66772332;rs17507821;rs56181519
AF	21	2:179411665:A:G	rs2288327	2q31.2	2	179411665	7.257e-25	179284643	179692967	181	133	9	rs2288327;rs78619854;rs2562834;rs12993099;rs10497523;rs967507;rs16866352;rs8179648;rs3731750	1	rs2288327
AF	22	2:201180023:C:T	rs3820888	2q33.1	2	201180023	5.748e-24	200715388	201253956	390	282	13	rs3820888;rs295114;rs1975583;rs2163548;rs3754798;rs1020111;rs13016447;rs7588746;rs952530;rs76112266;rs11889306;rs17531061;rs4673891	1	rs3820888
AF	23	2:213266003:A:T	rs35544454	2q34	2	213266003	1.1e-11	213223044	213382264	73	32	4	rs35544454;rs34990972;rs11681310;rs13019524	1	rs35544454
AF	24	3:12841804:A:G	rs7650482	3p25.2	3	12841804	1.793e-24	12795794	12859004	151	86	2	rs7650482;rs6797393	1	rs7650482
AF	25	3:24463235:C:T	rs73041705	3p24.2	3	24463235	1.546e-09	24418935	24475752	61	8	2	rs73041705;rs2217884	1	rs73041705
AF	26	3:38771925:C:G	rs6790396	3p22.2	3	38771925	2.401e-20	37922913	38826179	91	57	11	rs13097780;rs7373065;rs6599247;rs116202356;rs6790396;rs10428168;rs7611456;rs6599240;rs11129799;rs11129801;rs7430477	3	rs13097780;rs7373065;rs6790396
AF	27	3:66454191:A:G	rs34080181	3p14.1	3	66454191	1.278e-10	66325074	66492604	64	29	3	rs34080181;rs332388;rs4856794	1	rs34080181
AF	28	3:69406181:C:T	rs17005647	3p14.1	3	69406181	2.698e-09	69363524	69417585	38	17	2	rs17005647;rs113606656	1	rs17005647
AF	29	3:89489529:C:T	rs6771054	3p11.1	3	89489529	2.424e-11	89451721	89751353	45	36	1	rs6771054	1	rs6771054
AF	30	3:111554426:A:G	rs10804493	3q13.2	3	111554426	1.629e-15	111419486	111714771	281	160	9	rs10804493;rs142905901;rs10934122;rs73228590;rs16858936;rs113812270;rs9288930;rs6788410;rs36002857	2	rs10804493;rs6788410
AF	31	3:135814009:A:G	rs1278493	3q22.3	3	135814009	8.769e-09	135807609	136597120	165	6	1	rs1278493	1	rs1278493
AF	32	3:179172979:G:T	rs7612445	3q26.33	3	179172979	4.808e-09	179027192	179173969	74	27	3	rs7612445;rs75880040;rs4855076	1	rs7612445
AF	33	3:194800853:C:T	rs60902112	3q29	3	194800853	1.719e-08	194795645	194813159	16	3	1	rs60902112	1	rs60902112
AF	34	4:81164723:C:T	rs1458038	4q21.21	4	81164723	1.735e-09	81157703	81202048	19	8	1	rs1458038	1	rs1458038
AF	35	4:103890430:G:T	rs6818418	#N/A	4	103890430	4.863e-08	103618023	103975060	427	1	1	rs6818418	1	rs6818418
AF	36	4:111665916:C:T	rs1906611	#N/A	4	111665916	1.01e-305	111283206	112186199	960	571	90	rs141752220;rs114057251;rs17513625;rs13126426;rs150265677;rs78606958;rs13118687;rs35400392;rs482254;rs28705758;rs557785;rs17552555;rs77955149;rs10213638;rs10028326;rs524788;rs9997349;rs7682249;rs1470618;rs17042011;rs72656974;rs3796903;rs13121747;rs62338990;rs62337184;rs62337205;rs113640213;rs17746631;rs17625509;rs79738441;rs2595117;rs6850025;rs10021211;rs80141833;rs2595110;rs114014056;rs78245217;…	31	rs141752220;rs13118687;rs28705758;rs77955149;rs1470618;rs72656974;rs62338990;rs113640213;rs17746631;rs2595117;rs114014056;rs2595082;rs78734303;rs112599895;rs1906611;rs77668866;rs13105878;rs4834418;rs3855819;rs3853444;rs28601812;rs113832645;rs6838973;rs11098092;rs13149878;rs17513772;rs17513814;rs55947985;rs297006;rs72674110;rs1472076
AF	37	4:114448656:A:G	rs6829664	4q26	4	114448656	1.922e-13	114340363	114523729	100	53	5	rs6829664;rs75174764;rs13107881;rs62314976;rs7696743	1	rs6829664
AF	38	4:148937537:C:G	rs10213171	4q31.23	4	148937537	1.323e-11	148847584	149014109	100	77	3	rs10213171;rs62332205;rs75759772	1	rs10213171
AF	39	4:174642789:G:T	rs74500426	4q34.1	4	174642789	4.288e-13	174447349	174682576	49	32	6	rs10520260;rs2289517;rs11933956;rs74500426;rs4473633;rs17330098	2	rs10520260;rs74500426
AF	40	5:106427609:A:C	rs6596717	5q21.3	5	106427609	3e-09	106396918	106557132	115	32	1	rs6596717	1	rs6596717
AF	41	5:113737062:G:T	rs337705	5q22.3	5	113737062	1.634e-16	113733109	114451109	266	128	3	rs337705;rs12188044;rs7723727	2	rs337705;rs7723727
AF	42	5:128181345:C:G	rs1035407	#N/A	5	128181345	5.334e-09	127714704	128292189	138	45	2	rs10520002;rs1035407	2	rs10520002;rs1035407
AF	43	5:137419989:C:T	rs2040862	5q31.2	5	137419989	1.077e-35	136738113	137860472	783	540	23	rs739701;rs736514;rs11745324;rs2967791;rs7721277;rs112877791;rs7705323;rs112099533;rs916862;rs2040862;rs529526;rs217264;rs7735325;rs12719513;rs75900384;rs2905580;rs115555764;rs146949871;rs186665120;rs114279768;rs2240331;rs3813321;rs11567949	5	rs739701;rs11745324;rs2040862;rs146949871;rs2240331
AF	44	5:142818123:A:G	rs6580277	5q31.3	5	142818123	1.643e-17	142620736	142978777	300	218	19	rs6580277;rs56075823;rs76122881;rs12189303;rs57450351;rs11167820;rs6869983;rs7732768;rs7722813;rs12189392;rs853155;rs142327762;rs61751173;rs9324924;rs6865292;rs72802806;rs12513857;rs4912911;rs6896317	2	rs6580277;rs6896317
AF	45	5:168386089:A:G	rs12188351	5q34	5	168386089	2.516e-09	168355857	168426915	138	45	1	rs12188351	1	rs12188351
AF	46	5:172670745:G:T	rs6891790	5q35.1	5	172670745	4.531e-22	172473495	172677800	170	75	11	rs251247;rs1091970;rs55676951;rs55877020;rs62378333;rs6890182;rs29783;rs3095873;rs6884881;rs6891790;rs9313620	3	rs251247;rs6890182;rs6891790
AF	47	5:173392960:G:T	rs56180201	#N/A	5	173392960	8.091e-12	173269669	173399841	99	81	3	rs56180201;rs58403690;rs969518	1	rs56180201
AF	48	6:16415751:A:G	rs73366713	6p22.3	6	16415751	1.531e-25	16399680	16442458	23	21	8	rs4716067;rs9370893;rs17592806;rs4431439;rs438258;rs9477128;rs73366713;rs61061856	2	rs4716067;rs73366713
AF	49	6:18210109:A:G	rs34969716	6p22.3	6	18210109	1.595e-19	18210109	18413026	102	74	6	rs34969716;rs214509;rs214508;rs6459610;rs10949498;rs6931433	1	rs34969716
AF	50	6:36647289:A:G	rs3176326	6p21.2	6	36647289	1.424e-13	36618821	36649593	21	4	1	rs3176326	1	rs3176326
AF	51	6:87821501:A:G	rs2031522	6q14.3	6	87821501	1.465e-10	87756580	88406656	684	350	4	rs2031522;rs9294371;rs2246057;rs71572744	1	rs2031522
AF	52	6:117878313:C:G	rs210628	#N/A	6	117878313	1.086e-08	117863264	117989912	48	15	1	rs210628	1	rs210628
AF	53	6:118559658:A:T	rs3951016	6q22.31	6	118559658	2.149e-22	118532368	119027955	580	418	16	rs117246695;rs17079881;rs12210733;rs3951016;rs17337518;rs283062;rs72967533;rs4945621;rs62421535;rs56130945;rs9481842;rs2638550;rs139811148;rs11755295;rs10499088;rs145538762	4	rs117246695;rs3951016;rs139811148;rs10499088
AF	54	6:122403559:A:G	rs13195459	6q22.31	6	122403559	4.152e-19	121907968	122940296	563	232	10	rs9401451;rs9385216;rs9401427;rs13195459;rs2606645;rs13216068;rs590433;rs35617505;rs13199730;rs9372676	2	rs9401451;rs13195459
AF	55	6:149399100:G:T	rs117984853	6q25.1	6	149399100	1.342e-24	149283505	149433017	269	151	11	rs4358650;rs2500522;rs6904550;rs6570921;rs2486409;rs6924503;rs922833;rs117984853;rs78811127;rs116971782;rs1316535	3	rs4358650;rs117984853;rs1316535
AF	56	7:14372009:A:G	rs55734480	7p21.2	7	14372009	2.201e-12	14365616	14386532	16	13	2	rs55734480;rs2099282	1	rs55734480
AF	57	7:28415827:A:G	rs6462079	7p15.1	7	28415827	8.793e-10	28386991	28417916	38	17	2	rs6462079;rs6948592	1	rs6462079
AF	58	7:74339397:A:G	rs1635759	#N/A	7	74339397	2.558e-08	74110705	74368035	60	2	2	rs1635759;rs74910854	1	rs1635759
AF	59	7:75094329:A:G	rs113160991	#N/A	7	75094329	4.076e-08	75023850	75162278	15	1	1	rs113160991	1	rs113160991
AF	60	7:92278116:A:G	rs56201652	7q21.2	7	92278116	1.743e-12	92239144	92327026	49	27	2	rs56201652;rs17688839	1	rs56201652
AF	61	7:116191301:A:C	rs11773845	7q31.2	7	116191301	2.39e-55	115554257	116226422	491	345	31	rs11974466;rs1728723;rs1633714;rs12530912;rs2270189;rs11983865;rs12672038;rs7804372;rs35398698;rs2402056;rs35037360;rs10235210;rs11772846;rs7778733;rs2402036;rs11761443;rs4730751;rs1474511;rs2109516;rs9920;rs12706096;rs6466590;rs2740387;rs17138684;rs768107;rs926198;rs11773845;rs13246051;rs10279056;rs55701446;rs3807986	4	rs11974466;rs11772846;rs4730751;rs11773845
AF	62	7:128417044:G:T	rs55985730	7q32.1	7	128417044	5.236e-09	128417044	128417044	1	1	1	rs55985730	1	rs55985730
AF	63	7:150661409:A:G	rs7789146	7q36.1	7	150661409	2.116e-11	150620701	150669976	23	18	2	rs7789146;rs3807377	1	rs7789146
AF	64	8:11499908:A:C	rs35620480	8p23.1	8	11499908	5.152e-09	11495702	11514144	12	6	1	rs35620480	1	rs35620480
AF	65	8:17913970:A:G	rs7508	8p22	8	17913970	1.691e-21	17634746	17945990	623	163	7	rs7508;rs61108931;rs4921847;rs421781;rs403894;rs208757;rs373983	1	rs7508
AF	66	8:21821778:G:T	rs7834729	8p21.3	8	21821778	3.553e-10	21775838	21880741	56	38	1	rs7834729	1	rs7834729
AF	67	8:124551975:A:G	rs62521286	8q24.13	8	124551975	4.498e-19	124198306	124647557	106	89	7	rs62521286;rs58847541;rs62521843;rs62523171;rs62521279;rs7835298;rs4871397	3	rs62521286;rs7835298;rs4871397
AF	68	8:141740868:A:C	rs6994744	8q24.3	8	141740868	1.095e-09	141639503	142018581	403	237	1	rs6994744	1	rs6994744
AF	69	9:97713459:A:C	rs10821415	9q22.32	9	97713459	2.924e-34	97422533	98133913	305	182	14	rs7019540;rs656939;rs368030;rs10821415;rs4647395;rs356665;rs1027710;rs2810915;rs4460442;rs7847004;rs11788697;rs4744390;rs16911824;rs899268	3	rs7019540;rs10821415;rs899268
AF	70	9:139094773:A:G	rs2274115	9q34.3	9	139094773	1.691e-10	139084657	139109861	23	7	2	rs2274115;rs4842131	1	rs2274115
AF	71	10:65321147:A:C	rs12245149	10q21.3	10	65321147	1.664e-12	64874754	65400271	550	248	3	rs12245149;rs3847327;rs9414802	1	rs12245149
AF	72	10:69664881:C:T	rs7096385	10q21.3	10	69664881	4.871e-08	69566751	69868675	92	1	1	rs7096385	1	rs7096385
AF	73	10:75414344:C:G	rs60212594	10q22.2	10	75414344	9.199e-35	74796759	75690059	556	147	7	rs60212594;rs112950248;rs12262649;rs10458656;rs12644;rs11000726;rs12247028	1	rs60212594
AF	74	10:76851503:A:T	rs6480769	10q22.2	10	76851503	1.145e-08	76839355	76998092	72	27	1	rs6480769	1	rs6480769
AF	75	10:77936576:A:G	rs10458660	10q22.3	10	77936576	6.783e-10	77920739	77991907	111	80	2	rs10458660;rs10824382	1	rs10458660
AF	76	10:105342672:A:G	rs11598047	10q24.33	10	105342672	8.952e-66	103555611	105720351	677	427	61	rs1374471;rs11191116;rs3781295;rs2479550;rs12772375;rs117457051;rs141221125;rs149754618;rs7088041;rs10786757;rs11815073;rs11492754;rs77260060;rs7068070;rs7910092;rs3781338;rs35056927;rs2986037;rs10883882;rs7068081;rs11598047;rs7900994;rs77953709;rs12766741;rs3781335;rs3014204;rs79039404;rs11817727;rs7914871;rs60848348;rs11191727;rs117387787;rs138461584;rs3781339;rs12244353;rs3758576;rs34536993;rs…	14	rs1374471;rs3781295;rs117457051;rs7088041;rs77260060;rs7068070;rs11598047;rs117387787;rs138461584;rs3781339;rs3758576;rs35176054;rs10466138;rs2864003
AF	77	10:112576695:C:T	rs10749053	10q25.2	10	112576695	1.049e-08	112573867	112576695	5	2	1	rs10749053	1	rs10749053
AF	78	11:20011445:C:T	rs10741807	11p15.1	11	20011445	1.591e-20	19981419	20019137	103	74	8	rs10741807;rs2584846;rs10741804;rs7106847;rs4447157;rs2568122;rs10833214;rs35666863	1	rs10741807
AF	79	11:121661507:A:T	rs4935786	11q24.1	11	121661507	4.854e-09	121571609	121662150	190	20	1	rs4935786	1	rs4935786
AF	80	11:128764570:A:G	rs76097649	11q24.3	11	128764570	1.26e-20	128764180	128794234	61	38	5	rs76097649;rs11221500;rs6590357;rs7933444;rs10790977	1	rs76097649
AF	81	12:24779491:G:T	rs4963776	12p12.1	12	24779491	1.839e-25	24591890	24920794	181	90	13	rs2291437;rs3919954;rs7980180;rs7953024;rs7979271;rs6487409;rs3112133;rs11047491;rs11047492;rs11047497;rs10842379;rs4963776;rs12580418	3	rs2291437;rs10842379;rs4963776
AF	82	12:26345526:C:T	rs17380837	12p12.1	12	26345526	4.799e-12	26291149	26348429	55	26	2	rs17380837;rs61915724	1	rs17380837
AF	83	12:32978437:C:T	rs12809354	12p11.21	12	32978437	2.886e-14	32941446	33027458	16	12	2	rs12809354;rs111453405	1	rs12809354
AF	84	12:57105938:A:C	rs2860482	12q13.3	12	57105938	1.212e-12	56983424	57212827	208	99	3	rs2860482;rs2926747;rs9368	1	rs2860482
AF	85	12:70013415:A:G	rs71454237	12q15	12	70013415	1.784e-13	69863094	70098621	256	119	8	rs71454237;rs42874;rs12812948;rs11177733;rs776211;rs775439;rs4761254;rs775498	2	rs71454237;rs775439
AF	86	12:76237987:C:T	rs12426679	12q21.2	12	76237987	4.945e-09	76208361	76247543	58	9	2	rs12426679;rs6582306	1	rs12426679
AF	87	12:114793240:C:T	rs883079	12q24.21	12	114793240	2.837e-40	114692036	114877400	189	114	14	rs1247933;rs1247932;rs1920594;rs60029182;rs10744822;rs883079;rs7964303;rs2555030;rs1248051;rs2384404;rs1896002;rs112796855;rs17662087;rs11067089	3	rs1247933;rs883079;rs11067089
AF	88	12:123327900:A:C	rs10773657	12q24.31	12	123327900	2.537e-08	123223920	123385443	132	9	1	rs10773657	1	rs10773657
AF	89	12:133150210:C:T	rs6560886	12q24.33	12	133150210	1.491e-08	133138557	133150506	4	1	1	rs6560886	1	rs6560886
AF	90	13:23368943:C:T	rs9506925	13q12.12	13	23368943	2.716e-09	23327917	23433324	67	6	1	rs9506925	1	rs9506925
AF	91	13:113872712:C:T	rs35569628	13q34	13	113872712	1.378e-08	113818708	113911532	151	32	1	rs35569628	1	rs35569628
AF	92	14:23864804:C:T	rs422068	14q11.2	14	23864804	3.873e-10	23847194	23899027	40	8	6	rs422068;rs28631169;rs723840;rs8022522;rs451794;rs445754	1	rs422068
AF	93	14:32992334:C:G	rs4587869	#N/A	14	32992334	1.187e-20	32898974	33000955	92	40	6	rs1957021;rs71419908;rs111632052;rs4587869;rs1956997;rs4981979	2	rs1957021;rs4587869
AF	94	14:35173775:C:T	rs73241997	14q13.1	14	35173775	2.942e-15	35156561	35209986	138	72	5	rs73241997;rs10141892;rs11846704;rs8004043;rs111917040	1	rs73241997
AF	95	14:64679960:A:G	rs2738413	14q23.2	14	64679960	2.546e-31	64612845	64878265	308	208	15	rs2738413;rs2772163;rs4986938;rs7146434;rs8011682;rs2978381;rs12589834;rs10142766;rs55739639;rs34110441;rs11158540;rs10151658;rs3951150;rs2781381;rs1255992	1	rs2738413
AF	96	14:73249419:C:T	rs74884082	14q24.2	14	73249419	3.479e-10	73245571	73940636	157	13	3	rs74884082;rs2110552;rs12432062	2	rs74884082;rs2110552
AF	97	14:77426525:C:T	rs10873298	14q24.3	14	77426525	7.072e-09	77421559	77430681	13	9	2	rs10873298;rs4899629	1	rs10873298
AF	98	15:64103777:A:G	rs7170477	15q22.31	15	64103777	4.977e-08	63853052	64137238	88	1	1	rs7170477	1	rs7170477
AF	99	15:73677264:C:T	rs74022964	15q24.1	15	73677264	3.51e-36	73411597	73688728	188	96	7	rs1979409;rs74022964;rs75372618;rs143527241;rs11631651;rs117081649;rs7178084	2	rs1979409;rs74022964
AF	100	15:80676925:A:G	rs12908004	15q25.1	15	80676925	4.115e-16	80639941	81066058	66	33	6	rs12908004;rs12901940;rs12901125;rs3858966;rs71399411;rs2759301	2	rs12908004;rs2759301
AF	101	15:99268850:C:G	rs4965430	15q26.3	15	99268850	1.258e-10	99248018	99296459	76	25	1	rs4965430	1	rs4965430
AF	102	16:2003016:A:G	rs140185678	16p13.3	16	2003016	2.434e-14	2003016	2265271	13	5	4	rs140185678;rs2023274;rs2815301;rs77316573	4	rs140185678;rs2023274;rs2815301;rs77316573
AF	103	16:73053022:A:T	rs2359171	16q22.3	16	73053022	4.65e-91	72998236	73102243	116	95	21	rs2359171;rs1548373;rs4788694;rs9302644;rs9940321;rs728646;rs11641701;rs4788697;rs78053786;rs1183967;rs8055406;rs12325558;rs9930445;rs74883161;rs61208973;rs6499606;rs7185714;rs876727;rs56049219;rs62055084;rs9930504	3	rs2359171;rs876727;rs9930504
AF	104	17:1309850:A:G	rs7225165	17p13.3	17	1309850	3.203e-09	1246876	1314382	23	2	1	rs7225165	1	rs7225165
AF	105	17:7452977:C:T	rs9899183	17p13.1	17	7452977	2.017e-09	7351479	7533423	95	16	2	rs9899183;rs2071502	1	rs9899183
AF	106	17:12612931:C:T	rs55941572	17p12	17	12612931	4.447e-11	12595075	12618680	18	13	1	rs55941572	1	rs55941572
AF	107	17:38031164:C:T	rs11658278	17q21.1	17	38031164	3.465e-11	37780296	38177839	226	62	4	rs11658278;rs870829;rs12453732;rs11653998	1	rs11658278
AF	108	17:44874453:C:T	rs1563304	17q21.31	17	44874453	2.557e-12	43463493	45244074	3921	1266	4	rs1563304;rs3933653;rs17608766;rs2732705	1	rs1563304
AF	109	17:76773638:C:T	rs12604076	17q25.3	17	76773638	3.627e-08	76661269	76833916	118	3	1	rs12604076	1	rs12604076
AF	110	18:46474192:C:T	rs9953366	18q21.1	18	46474192	1.823e-11	46474192	46528787	33	25	3	rs9953366;rs11660997;rs866245	1	rs9953366
AF	111	18:48708548:A:C	rs8088085	18q21.2	18	48708548	4.794e-08	48679522	48782864	189	2	2	rs9963878;rs8088085	2	rs9963878;rs8088085
AF	112	21:36119111:G:T	rs2834618	21q22.12	21	36119111	3.412e-17	36119111	36120052	2	2	1	rs2834618	1	rs2834618
AF	113	22:18597502:C:T	rs464901	22q11.21	22	18597502	1.531e-12	18563986	18601415	38	14	5	rs464901;rs361540;rs362262;rs456448;rs362043	1	rs464901
AF	114	22:26164079:C:T	rs133902	22q12.1	22	26164079	9.137e-10	26156431	26164079	8	4	1	rs133902	1	rs133902
CAD	1	1:2245570:C:G	rs2843152	1p36.32	1	2245570	7.264e-13	2149292	2252759	91	25	5	rs1692580;rs2843152;rs72920928;rs12743493;rs2173049	2	rs1692580;rs2843152
CAD	2	1:3325912:A:C	rs2493298	1p36.32	1	3325912	2.095e-11	2984087	3330884	38	19	3	rs2981890;rs2493298;rs12747145	2	rs2981890;rs2493298
CAD	3	1:27284913:C:T	rs79598313	1p36.11	1	27284913	3.604e-08	26933591	27368126	8	1	1	rs79598313	1	rs79598313
CAD	4	1:38461319:A:C	rs61776719	1p34.3	1	38461319	5.739e-12	38238071	38463504	116	46	6	rs61776719;rs2291297;rs28580415;rs28470722;rs871524;rs28545785	1	rs61776719
CAD	5	1:55505647:G:T	rs11591147	1p32.3	1	55505647	1.324e-28	55485796	55646006	91	18	8	rs12117661;rs11206510;rs2479393;rs11591147;rs472495;rs565436;rs2479413;rs499883	4	rs12117661;rs2479393;rs11591147;rs472495
CAD	6	1:57016131:A:C	rs56170783	1p32.2	1	57016131	1.733e-38	56524552	57020650	209	115	10	rs12116494;rs11206803;rs12408513;rs61772618;rs61772593;rs56170783;rs6688564;rs2404716;rs10888977;rs72664358	4	rs12116494;rs11206803;rs61772618;rs56170783
CAD	7	1:59433354:C:T	rs71646019	1p32.1	1	59433354	6.053e-10	59416511	59485091	62	16	1	rs71646019	1	rs71646019
CAD	8	1:109817590:G:T	rs12740374	1p13.3	1	109817590	1.356e-57	109715950	110271340	126	70	21	rs611060;rs61799430;rs596773;rs10858082;rs6698843;rs4970834;rs4970837;rs657420;rs672569;rs604349;rs17035665;rs67269326;rs585362;rs6657811;rs72703204;rs12740374;rs79482788;rs138361368;rs12127701;rs75237799;rs413582	6	rs611060;rs17035665;rs12740374;rs138361368;rs12127701;rs413582
CAD	9	1:114173410:A:G	rs1230666	1p13.2	1	114173410	5.102e-13	114075796	114451425	388	68	7	rs1230666;rs4145859;rs1539437;rs2476601;rs10858023;rs11102702;rs1217375	2	rs1230666;rs1217375
CAD	10	1:115898783:A:C	rs61797063	1p13.2	1	115898783	8.467e-09	115883203	115909608	39	5	1	rs61797063	1	rs61797063
CAD	11	1:150572037:A:T	rs11585169	1q21.2	1	150572037	1.043e-14	149892872	151780728	603	383	16	rs67807996;rs4970935;rs9659073;rs11585169;rs6681426;rs11204701;rs2864871;rs10305667;rs35309985;rs12143614;rs3754211;rs72708423;rs11576320;rs11810571;rs12035531;rs6587606	4	rs67807996;rs4970935;rs11585169;rs11810571
CAD	12	1:154419843:A:G	rs6686750	1q21.3	1	154419843	1.87e-15	154394297	154428505	70	54	3	rs6686750;rs4601580;rs11265613	1	rs6686750
CAD	13	1:169314833:A:G	rs61806987	1q24.2	1	169314833	6.845e-12	169088388	169457028	545	384	3	rs61806987;rs1200157;rs2179491	1	rs61806987
CAD	14	1:175130983:A:T	rs2285219	1q25.1	1	175130983	3.236e-08	175111760	175139295	48	10	1	rs2285219	1	rs2285219
CAD	15	1:200655233:A:G	rs11581339	1q32.1	1	200655233	4.717e-08	200592295	200665607	88	1	1	rs11581339	1	rs11581339
CAD	16	1:210468999:C:T	rs60154123	1q32.2	1	210468999	1.6e-08	210191272	210548548	105	3	1	rs60154123	1	rs60154123
CAD	17	1:222828704:C:T	rs17163363	1q41	1	222828704	4.874e-36	222638446	222958142	343	255	17	rs17463531;rs34630232;rs78105327;rs3002128;rs17163363;rs3008633;rs11487858;rs61826471;rs35325797;rs2936044;rs3002132;rs4618978;rs3002141;rs904324;rs3002145;rs1909197;rs61824282	2	rs17463531;rs17163363
CAD	18	2:19942473:A:G	rs16986953	2p24.1	2	19942473	7.114e-20	19917131	20058602	134	28	5	rs2881743;rs896802;rs11690613;rs16986953;rs2083141	3	rs2881743;rs16986953;rs2083141
CAD	19	2:21286057:C:T	rs515135	2p24.1	2	21286057	3.58e-19	21179426	21471603	404	285	11	rs515135;rs34468875;rs403880;rs35239705;rs1848922;rs2854725;rs12720820;rs531819;rs72902584;rs7566030;rs4635554	2	rs515135;rs4635554
CAD	20	2:44074431:C:T	rs4245791	2p21	2	44074431	1.009e-19	44052743	44099582	40	30	3	rs4245791;rs4148218;rs76866386	2	rs4245791;rs76866386
CAD	21	2:45896437:A:C	rs582384	2p21	2	45896437	1.552e-08	45863787	45901589	24	4	2	rs582384;rs6716707	1	rs582384
CAD	22	2:60619028:A:G	rs243071	2p16.1	2	60619028	2.647e-08	60610411	60626305	19	1	1	rs243071	1	rs243071
CAD	23	2:85762048:A:T	rs10176176	2p11.2	2	85762048	4.274e-31	85689845	85893292	197	142	12	rs10176176;rs699664;rs1254897;rs62166769;rs2289976;rs1049363;rs6547629;rs72838575;rs4268923;rs72838587;rs9751370;rs28404046	1	rs10176176
CAD	24	2:128785663:C:T	rs114192718	#N/A	2	128785663	2.581e-08	128437163	128785663	6	2	2	rs77836623;rs114192718	2	rs77836623;rs114192718
CAD	25	2:144186475:C:T	rs4662330	2q22.3	2	144186475	7.299e-12	144151524	144259543	25	19	2	rs4662330;rs13010737	1	rs4662330
CAD	26	2:145831428:C:T	rs10928241	2q22.3	2	145831428	1.849e-14	145222171	145951716	176	119	8	rs6740731;rs13034360;rs6755392;rs10928241;rs62167177;rs17407658;rs1371046;rs4662414	2	rs6740731;rs10928241
CAD	27	2:148377860:C:T	rs35611688	2q22.3	2	148377860	1.537e-08	148373440	148438714	61	8	1	rs35611688	1	rs35611688
CAD	28	2:164930382:A:T	rs10930115	2q24.3	2	164930382	5.072e-11	164889134	165125242	107	72	4	rs10930115;rs268263;rs34399494;rs12999907	1	rs10930115
CAD	29	2:203877233:C:T	rs148812085	2q33.2	2	203877233	5.105e-50	203050678	204544427	593	461	18	rs148812085;rs11676242;rs12466364;rs72940158;rs78999781;rs139644567;rs114296372;rs144923024;rs145327575;rs7581542;rs72928925;rs146289328;rs72928975;rs4675290;rs10170010;rs74923585;rs2465520;rs1174607	3	rs148812085;rs2465520;rs1174607
CAD	30	2:216299629:C:G	rs1250247	2q35	2	216299629	2.373e-18	216287093	216316487	23	22	3	rs1250247;rs4473378;rs17517928	1	rs1250247
CAD	31	2:218683154:A:G	rs2571445	2q35	2	218683154	3.895e-11	218666889	218745477	43	28	5	rs2571445;rs12466972;rs2161969;rs41383244;rs112941127	2	rs2571445;rs112941127
CAD	32	2:227062080:A:G	rs952227	2q36.3	2	227062080	1.123e-12	227020653	227199263	150	102	4	rs952227;rs2972149;rs10194882;rs79567528	1	rs952227
CAD	33	2:230012076:A:T	rs11691714	2q36.3	2	230012076	1.009e-09	229977915	230014441	56	28	1	rs11691714	1	rs11691714
CAD	34	2:233645691:A:G	rs283485	2q37.1	2	233645691	1.01e-10	233557043	233754364	177	109	1	rs283485	1	rs283485
CAD	35	3:14926351:C:T	rs34991912	3p25.1	3	14926351	7.285e-12	14855157	14958126	152	48	6	rs1602302;rs58461937;rs744892;rs7613427;rs34991912;rs13080924	2	rs1602302;rs34991912
CAD	36	3:46880130:C:T	rs78629618	3p21.31	3	46880130	4.123e-08	46736187	47506230	10	1	1	rs78629618	1	rs78629618
CAD	37	3:49162284:C:T	rs34759087	3p21.31	3	49162284	6.228e-11	48570686	50209053	596	197	8	rs34759087;rs9814873;rs147997200;rs73079003;rs73078367;rs2352974;rs7642934;rs7373849	2	rs34759087;rs2352974
CAD	38	3:52848207:C:T	rs77347777	3p21.1	3	52848207	1.51e-09	52848207	52848207	1	1	1	rs77347777	1	rs77347777
CAD	39	3:124453022:G:T	rs17843797	3q21.2	3	124453022	1.496e-14	124438586	124501821	20	9	1	rs17843797	1	rs17843797
CAD	40	3:135880410:A:T	rs9647335	3q22.3	3	135880410	2.461e-15	135619585	136669079	738	243	8	rs6799517;rs6787409;rs9647335;rs35970307;rs711976;rs13063893;rs1280623;rs2343681	2	rs6799517;rs9647335
CAD	41	3:138092889:C:T	rs185244	3q22.3	3	138092889	3.218e-19	137906532	138347164	229	92	6	rs185244;rs13080413;rs1109088;rs1679170;rs56236670;rs13059110	1	rs185244
CAD	42	3:153937753:A:G	rs357494	3q25.2	3	153937753	4.905e-14	153555140	154118841	591	351	6	rs357494;rs9820619;rs701146;rs73156603;rs4680124;rs62279489	1	rs357494
CAD	43	3:156852592:C:G	rs4266144	3q25.31	3	156852592	5.6e-09	156827955	156855235	21	7	2	rs4266144;rs34696078	1	rs4266144
CAD	44	3:172115902:A:G	rs12897	3q26.31	3	172115902	1.073e-08	172115902	172119166	7	1	1	rs12897	1	rs12897
CAD	45	4:54572066:G:T	rs17083333	#N/A	4	54572066	1.232e-08	54572066	54612302	7	1	1	rs17083333	1	rs17083333
CAD	46	4:57781754:A:G	rs781663	4q12	4	57781754	1.074e-11	57708306	57841213	52	40	2	rs781663;rs704637	1	rs781663
CAD	47	4:77416627:A:G	rs12500824	4q21.1	4	77416627	3.152e-09	77384592	77437749	23	11	1	rs12500824	1	rs12500824
CAD	48	4:81181072:A:T	rs10857147	4q21.21	4	81181072	5.131e-14	81157703	81202048	21	13	2	rs10857147;rs1902859	1	rs10857147
CAD	49	4:82587050:A:G	rs11099493	4q21.22	4	82587050	2.443e-10	82576859	82625720	4	1	1	rs11099493	1	rs11099493
CAD	50	4:120909501:A:C	rs7678555	4q27	4	120909501	3.077e-16	120056815	120968070	1380	626	12	rs6820115;rs72920701;rs62319649;rs6843643;rs13136593;rs925387;rs57842733;rs60899768;rs7678555;rs4834831;rs10446728;rs4834827	2	rs6820115;rs7678555
CAD	51	4:146784774:A:G	rs13124853	4q31.21	4	146784774	3.135e-09	146756490	146821725	31	17	2	rs13124853;rs4345206	1	rs13124853
CAD	52	4:148401190:A:G	rs6841581	4q31.22	4	148401190	2.653e-30	148066499	148500724	208	145	11	rs4593108;rs113436562;rs6857197;rs78381016;rs149722146;rs1429126;rs6841581;rs139452637;rs72955609;rs6537481;rs58429763	5	rs4593108;rs149722146;rs1429126;rs6841581;rs58429763
CAD	53	4:156638073:C:G	rs3796587	4q32.1	4	156638073	6.037e-23	156393097	156685162	198	115	10	rs6536072;rs10029530;rs7440763;rs7670965;rs13152538;rs10517622;rs3796587;rs6827908;rs56286465;rs28531888	4	rs6536072;rs7440763;rs10517622;rs3796587
CAD	54	4:169688000:A:C	rs869396	4q32.3	4	169688000	8.86e-12	169682578	169744567	40	22	2	rs869396;rs7672462	1	rs869396
CAD	55	5:9552338:A:G	rs17263917	5p15.31	5	9552338	1.449e-15	9538296	9557602	40	36	1	rs17263917	1	rs17263917
CAD	56	5:52193125:A:G	rs4074793	5q11.2	5	52193125	1.605e-08	52193125	52193237	2	1	1	rs4074793	1	rs4074793
CAD	57	5:55860866:G:T	rs3936510	5q11.2	5	55860866	2.601e-13	55441571	55868097	18	12	3	rs62362364;rs3936510;rs13179413	2	rs62362364;rs3936510
CAD	58	5:74656539:C:T	rs12916	5q13.3	5	74656539	1.305e-08	74565199	74934009	73	1	1	rs12916	1	rs12916
CAD	59	5:108085190:A:G	rs112949822	5q21.3	5	108085190	1.143e-09	108046013	108220554	47	27	1	rs112949822	1	rs112949822
CAD	60	5:121361750:A:T	rs113075218	5q23.1	5	121361750	1.199e-09	121265925	121404880	118	29	1	rs113075218	1	rs113075218
CAD	61	5:128014866:C:G	rs35742495	5q23.3	5	128014866	7.066e-10	127865070	128053546	94	49	2	rs35742495;rs6883598	1	rs35742495
CAD	62	5:131795310:G:T	rs10477741	5q31.1	5	131795310	3.488e-11	131667353	131809316	49	22	2	rs10477741;rs10069798	1	rs10477741
CAD	63	5:141901900:C:T	rs7703260	5q31.3	5	141901900	1.856e-08	141872821	141947822	51	3	2	rs7703260;rs249760	1	rs7703260
CAD	64	5:142494165:A:G	rs3776307	5q31.3	5	142494165	6.699e-12	142494165	142518675	14	14	3	rs3776307;rs246607;rs12522841	1	rs3776307
CAD	65	6:1617327:C:T	rs72836800	6p25.3	6	1617327	3.111e-11	1614787	1624512	9	8	2	rs72836800;rs62390614	1	rs72836800
CAD	66	6:12903957:A:G	rs9349379	6p24.1	6	12903957	4.02e-114	12718156	13139616	469	350	25	rs1412748;rs9381401;rs1412740;rs17679417;rs9472790;rs8180628;rs9463072;rs62389950;rs17679590;rs72835702;rs10456561;rs2095122;rs7454157;rs9349379;rs111969884;rs13209002;rs72820839;rs9473086;rs1937768;rs12202891;rs34814928;rs12207703;rs9381634;rs62389460;rs11751831	9	rs1412748;rs62389950;rs72835702;rs10456561;rs2095122;rs9349379;rs34814928;rs12207703;rs62389460
CAD	67	6:22612629:A:G	rs6909752	6p22.3	6	22612629	1.669e-11	22557915	22620904	90	64	1	rs6909752	1	rs6909752
CAD	68	6:34793124:A:G	rs9469899	6p21.31	6	34793124	1.472e-11	34548206	35615130	529	356	4	rs9469899;rs114863007;rs28567450;rs113244441	2	rs9469899;rs113244441
CAD	69	6:39171862:C:T	rs733701	6p21.2	6	39171862	2.816e-13	39124448	39189361	35	28	3	rs10947786;rs12190363;rs733701	2	rs10947786;rs733701
CAD	70	6:43068370:G:T	rs1034246	6p21.1	6	43068370	6.389e-10	43050824	43079575	26	5	2	rs1034246;rs3793018	1	rs1034246
CAD	71	6:43758873:A:G	rs6905288	6p21.1	6	43758873	5.022e-13	43756863	43765533	9	6	3	rs6905288;rs1358980;rs2146324	1	rs6905288
CAD	72	6:57145562:C:T	rs11752218	6p11.2	6	57145562	4.005e-14	56903750	57161226	126	71	7	rs11752218;rs806386;rs223287;rs6906645;rs9475818;rs12191844;rs6459182	2	rs11752218;rs9475818
CAD	73	6:82595959:C:T	rs9361867	6q14.1	6	82595959	5.107e-12	82591279	82716275	58	40	3	rs9361867;rs1931656;rs1582218	1	rs9361867
CAD	74	6:97029871:A:G	rs2983896	6q16.1	6	97029871	1.44e-09	96841762	97067047	205	54	1	rs2983896	1	rs2983896
CAD	75	6:126717064:A:G	rs1591805	6q22.32	6	126717064	4.132e-09	126623947	127080700	268	19	2	rs1591805;rs4897175	1	rs1591805
CAD	76	6:134202690:C:T	rs2327426	6q23.2	6	134202690	4.466e-30	133992791	134379869	320	138	14	rs6919211;rs2327426;rs3777891;rs162185;rs162190;rs1208256;rs1853437;rs17062904;rs1208264;rs9389106;rs1029212;rs2327433;rs2492304;rs2627230	4	rs6919211;rs2327426;rs2327433;rs2492304
CAD	77	6:151008837:A:T	rs62434129	6q25.1	6	151008837	1.514e-08	150975312	151008874	38	11	1	rs62434129	1	rs62434129
CAD	78	6:161010118:A:G	rs10455872	6q25.3	6	161010118	2.18e-186	160185151	161682569	1298	767	93	rs5015801;rs9457761;rs111226116;rs9295128;rs9456454;rs2297362;rs9456496;rs9456497;rs688359;rs8191728;rs4646272;rs16891156;rs2297374;rs461473;rs9457853;rs9457861;rs3861973;rs145221006;rs3798160;rs624249;rs117965696;rs403131;rs386453;rs512077;rs12660365;rs4708867;rs505000;rs415317;rs143113590;rs146184004;rs10755577;rs7757336;rs79390162;rs138799654;rs78439586;rs2665356;rs6938647;rs1605965;rs3106166;…	28	rs5015801;rs9456454;rs9456496;rs4646272;rs2297374;rs9457853;rs3861973;rs386453;rs146184004;rs138799654;rs78439586;rs3106166;rs2076828;rs2504922;rs41267809;rs10455872;rs73596816;rs6905073;rs1998045;rs186696265;rs783144;rs4252066;rs1835346;rs783175;rs79684526;rs10214652;rs67531830;rs3798942
CAD	79	7:1879843:A:G	rs10228189	7p22.3	7	1879843	1.242e-08	1822820	2021248	129	16	2	rs10228189;rs11772232	1	rs10228189
CAD	80	7:6487131:C:G	rs4724806	7p22.1	7	6487131	3.361e-10	6396647	6488097	86	47	2	rs4724806;rs117028223	1	rs4724806
CAD	81	7:12251790:C:G	rs1019307	7p21.3	7	12251790	1.226e-08	12233848	12285140	123	10	1	rs1019307	1	rs1019307
CAD	82	7:19049388:A:G	rs2107595	7p21.1	7	19049388	3.612e-24	19031935	19060333	24	23	3	rs2107595;rs10227612;rs10241964	1	rs2107595
CAD	83	7:20300416:A:G	rs10486389	7p21.1	7	20300416	6.511e-10	20289490	20337279	51	6	1	rs10486389	1	rs10486389
CAD	84	7:35277093:A:C	rs2215614	7p14.2	7	35277093	2.964e-11	35251096	35304164	122	91	1	rs2215614	1	rs2215614
CAD	85	7:45077978:A:G	rs2107732	7p13	7	45077978	1.526e-08	45036785	45105146	4	1	1	rs2107732	1	rs2107732
CAD	86	7:106941324:C:T	rs12112877	7q22.3	7	106941324	3.717e-10	106796537	107304628	223	139	1	rs12112877	1	rs12112877
CAD	87	7:114287116:A:T	rs2045292	7q31.1	7	114287116	4.089e-08	114021870	114290415	38	3	1	rs2045292	1	rs2045292
CAD	88	7:117100046:G:T	rs13222797	7q31.2	7	117100046	5.507e-10	116954785	117346660	139	90	1	rs13222797	1	rs13222797
CAD	89	7:129663496:C:T	rs11556924	7q32.2	7	129663496	3.777e-21	129632081	129696462	45	9	4	rs11556924;rs11768743;rs62489409;rs7781012	1	rs11556924
CAD	90	7:150690176:C:T	rs3918226	7q36.1	7	150690176	4.597e-32	150684021	150690176	2	2	2	rs3918226;rs117564322	1	rs3918226
CAD	91	8:18260431:G:T	rs4646249	8p22	8	18260431	8.177e-10	18239697	18291590	76	33	2	rs4646249;rs35354956	1	rs4646249
CAD	92	8:19865747:C:T	rs894211	8p21.3	8	19865747	1.38e-16	19747678	19943308	494	245	17	rs268;rs894211;rs894210;rs34693282;rs6586891;rs4128744;rs74304285;rs343;rs263;rs301;rs4464984;rs17091891;rs77917292;rs114855192;rs66778572;rs28597716;rs13263508	5	rs268;rs894211;rs77917292;rs66778572;rs13263508
CAD	93	8:22048490:A:G	rs56408342	8p21.3	8	22048490	2.3e-12	22021130	22056435	46	44	1	rs56408342	1	rs56408342
CAD	94	8:25065929:G:T	rs10108438	8p21.2	8	25065929	2.925e-08	25025177	25065956	41	10	1	rs10108438	1	rs10108438
CAD	95	8:95278307:C:G	rs34917849	8q22.1	8	95278307	1.108e-08	95250558	95281278	24	7	1	rs34917849	1	rs34917849
CAD	96	8:126478450:C:T	rs2001846	8q24.13	8	126478450	6.022e-22	126475770	126507389	68	50	3	rs2001846;rs28601761;rs2980858	1	rs2001846
CAD	97	9:13724051:A:T	rs10961206	9p23	9	13724051	8.098e-10	13663166	13736965	114	6	2	rs10961206;rs688784	1	rs10961206
CAD	98	9:22098619:A:G	rs2891168	9p21.3	9	22098619	4.99e-278	21683805	22138762	725	295	48	rs11523031;rs1869204;rs10965116;rs62559378;rs10738596;rs4364717;rs2518710;rs71506705;rs7852128;rs62556523;rs62555371;rs74903566;rs61271866;rs76959412;rs10965197;rs7041637;rs3731211;rs66478960;rs117197971;rs67226702;rs3731249;rs72652409;rs11515;rs13288666;rs13298881;rs7858261;rs13301964;rs3731239;rs504318;rs564398;rs1333040;rs7857345;rs3731221;rs117626887;rs16905599;rs77283072;rs4977754;rs1855185;…	19	rs11523031;rs2518710;rs7852128;rs62556523;rs74903566;rs10965197;rs117197971;rs3731249;rs13288666;rs3731239;rs3731221;rs117626887;rs16905599;rs1855185;rs10965228;rs68006815;rs2891168;rs72652478;rs7018475
CAD	99	9:110530324:A:G	rs1967604	9q31.2	9	110530324	4.641e-16	110499193	110546149	61	40	6	rs1967604;rs2140481;rs7042939;rs4978566;rs944174;rs1952672	1	rs1967604
CAD	100	9:123729962:C:T	rs58328848	9q33.2	9	123729962	1.22e-08	123641168	123731584	89	20	1	rs58328848	1	rs58328848
CAD	101	9:124420173:C:T	rs885150	9q33.2	9	124420173	1.978e-11	124411497	124422403	20	15	1	rs885150	1	rs885150
CAD	102	9:136153875:C:T	rs651007	9q34.2	9	136153875	1.282e-18	136138765	136339755	31	9	3	rs651007;rs11244061;rs3758348	1	rs651007
CAD	103	10:12275947:A:G	rs17566555	10p13	10	12275947	4.332e-11	12241815	12324943	81	35	2	rs17566555;rs61848342	1	rs17566555
CAD	104	10:30317073:A:G	rs9337951	10p11.23	10	30317073	1.385e-23	30290332	30566683	253	160	9	rs9337951;rs10826751;rs2505084;rs12259037;rs2487926;rs475616;rs77832593;rs4749530;rs10826764	2	rs9337951;rs475616
CAD	105	10:44741256:A:G	rs494207	10q11.21	10	44741256	9.935e-25	44354542	44832431	636	476	27	rs1870635;rs10899965;rs4948595;rs1254675;rs1833024;rs2624688;rs189723;rs2818912;rs2804042;rs1623851;rs10899953;rs1254860;rs1977341;rs494207;rs475926;rs1657345;rs61856370;rs800314;rs11814779;rs61856412;rs142539486;rs2862835;rs2624676;rs61855759;rs2804032;rs1746043;rs11238956	3	rs1870635;rs494207;rs11238956
CAD	106	10:82262826:C:T	rs12260962	10q23.1	10	82262826	2.208e-10	82236499	82283255	23	11	2	rs12260962;rs12264252	1	rs12260962
CAD	107	10:91007360:G:T	rs1051338	10q23.31	10	91007360	1.404e-28	90988250	91014061	38	32	3	rs1051338;rs2250781;rs2071509	1	rs1051338
CAD	108	10:96029170:C:T	rs55753709	10q23.33	10	96029170	2.177e-13	95974488	96040394	48	29	2	rs55753709;rs35632833	1	rs55753709
CAD	109	10:99926271:A:T	rs7071239	10q24.2	10	99926271	2.898e-09	99863549	100027987	41	27	1	rs7071239	1	rs7071239
CAD	110	10:104776205:C:T	rs77787671	10q24.32	10	104776205	2.761e-15	104504564	105059896	169	123	5	rs77787671;rs999867;rs72841270;rs12414777;rs79780963	2	rs77787671;rs79780963
CAD	111	10:105643223:C:G	rs2067831	10q24.33	10	105643223	2.613e-14	105608838	105720733	148	103	7	rs2067831;rs1980653;rs36038963;rs61863693;rs10748858;rs7907606;rs35007589	2	rs2067831;rs7907606
CAD	112	10:124230750:G:T	rs2672592	10q26.13	10	124230750	2.472e-10	124016160	124238997	131	35	7	rs61871680;rs35444643;rs11200519;rs77494534;rs5017040;rs2672592;rs4752700	3	rs61871680;rs77494534;rs2672592
CAD	113	11:5701074:A:C	rs11601507	11p15.4	11	5701074	4.4e-11	5701074	5701074	1	1	1	rs11601507	1	rs11601507
CAD	114	11:9762274:C:T	rs360153	11p15.4	11	9762274	2.976e-14	9160766	10311337	153	78	5	rs4537761;rs360153;rs10734649;rs360141;rs67257108	3	rs4537761;rs360153;rs67257108
CAD	115	11:13301548:A:T	rs1351525	11p15.3	11	13301548	1.178e-08	13267867	13345115	105	9	1	rs1351525	1	rs1351525
CAD	116	11:32380521:C:T	rs7118294	11p13	11	32380521	1.799e-11	32372772	32461090	72	11	2	rs7118294;rs3818055	1	rs7118294
CAD	117	11:65405600:G:T	rs2306363	11q13.1	11	65405600	1.463e-11	65349063	65564987	80	50	3	rs3741380;rs2306363;rs4930299	2	rs3741380;rs2306363
CAD	118	11:75277628:A:G	rs584961	11q13.5	11	75277628	1.499e-14	75274150	75284890	23	18	2	rs615896;rs584961	2	rs615896;rs584961
CAD	119	11:100593538:C:G	rs633185	11q22.1	11	100593538	5.567e-13	100509745	100684879	185	97	6	rs633185;rs4754698;rs4121392;rs10750593;rs71476642;rs17712139	1	rs633185
CAD	120	11:102791236:A:T	rs2096766	#N/A	11	102791236	4.153e-10	102779477	102806458	22	16	3	rs2096766;rs12788925;rs1892971	2	rs2096766;rs1892971
CAD	121	11:103673294:A:T	rs2839812	11q22.3	11	103673294	1.896e-33	103499104	103763638	468	297	15	rs2839812;rs10791643;rs12223045;rs11226045;rs11226048;rs557058;rs10488749;rs10895508;rs11225976;rs1564681;rs11225999;rs4754984;rs4754985;rs35382151;rs7951437	1	rs2839812
CAD	122	11:110244360:A:T	rs10488763	11q22.3	11	110244360	1.309e-08	110229873	110244360	3	2	1	rs10488763	1	rs10488763
CAD	123	11:116648917:C:G	rs964184	11q23.3	11	116648917	4.409e-17	116581259	116667083	75	45	5	rs964184;rs61905116;rs11604424;rs662799;rs6589563	1	rs964184
CAD	124	11:118949331:C:T	rs1177562	11q23.3	11	118949331	7.603e-11	118913993	118958869	54	38	1	rs1177562	1	rs1177562
CAD	125	11:120363937:C:T	rs4938809	#N/A	11	120363937	4.585e-08	120363449	120371653	4	1	1	rs4938809	1	rs4938809
CAD	126	11:126262638:A:G	rs10790800	#N/A	11	126262638	9.12e-09	126219396	126281897	29	7	3	rs10790800;rs1316361;rs35099186	1	rs10790800
CAD	127	12:7175872:C:T	rs11838267	12p13.31	12	7175872	2.285e-10	7155307	7181948	31	16	1	rs11838267	1	rs11838267
CAD	128	12:20220033:C:G	rs10841443	12p12.2	12	20220033	3.852e-14	20144754	20247540	199	111	5	rs10841443;rs3886356;rs2579287;rs10743353;rs10743354	1	rs10841443
CAD	129	12:54521594:C:T	rs75160195	12q13.13	12	54521594	5.311e-17	54496219	54574701	44	28	4	rs75160195;rs7970400;rs12229805;rs1133773	1	rs75160195
CAD	130	12:90008959:A:G	rs2681472	12q21.33	12	90008959	2.458e-18	89797700	90091782	158	94	5	rs2681472;rs12578201;rs145485557;rs11105325;rs1689040	1	rs2681472
CAD	131	12:95507971:A:G	rs11107903	12q22	12	95507971	5.285e-18	95346657	95706624	206	146	6	rs11107903;rs9919687;rs12372256;rs7306455;rs4762452;rs6538595	1	rs11107903
CAD	132	12:111910219:A:G	rs10774625	12q24.12	12	111910219	1.466e-28	111359712	113200293	1192	758	16	rs10774625;rs648997;rs610769;rs4766897;rs2238151;rs77215829;rs12302980;rs11065822;rs4766566;rs1265564;rs7300860;rs7398796;rs4375492;rs2272308;rs2239194;rs7314022	3	rs10774625;rs2272308;rs7314022
CAD	133	12:115353368:C:T	rs34606058	12q24.21	12	115353368	7.686e-09	115344358	115374959	33	18	2	rs34606058;rs4767278	1	rs34606058
CAD	134	12:121416988:A:G	rs2244608	12q24.31	12	121416988	2.354e-20	121220375	121489586	151	98	11	rs2244608;rs1169286;rs1169299;rs2254971;rs2701180;rs56158042;rs2708081;rs3213545;rs2859398;rs11065332;rs11065365	1	rs2244608
CAD	135	12:124455818:C:T	rs12301673	12q24.31	12	124455818	3.274e-09	124399155	124576837	159	57	2	rs12301673;rs10773049	2	rs12301673;rs10773049
CAD	136	12:125315647:A:G	rs7485656	12q24.31	12	125315647	2.655e-22	125303254	125339228	24	18	5	rs7485656;rs12581963;rs7296737;rs4765626;rs10773109	2	rs7485656;rs7296737
CAD	137	13:28962686:C:T	rs17086617	13q12.3	13	28962686	1.018e-13	28943002	29047968	118	80	6	rs17086617;rs7330091;rs9513094;rs3751395;rs663137;rs2093821	2	rs17086617;rs663137
CAD	138	13:33126074:C:T	rs7991314	13q13.1	13	33126074	1.788e-08	32996332	33381342	366	4	1	rs7991314	1	rs7991314
CAD	139	13:99434810:C:G	rs8000794	13q32.3	13	99434810	4.316e-08	99429390	99437980	26	1	1	rs8000794	1	rs8000794
CAD	140	13:111049623:C:T	rs9515203	13q34	13	111049623	6.485e-28	110788441	111120030	253	148	34	rs11617955;rs9588107;rs12866570;rs638634;rs13260;rs3742207;rs9521636;rs9521642;rs11619113;rs34987036;rs35486774;rs693831;rs4145073;rs9521671;rs4773141;rs9521687;rs12429386;rs58045791;rs7334306;rs12431029;rs4773140;rs9515203;rs7335876;rs1888003;rs9521724;rs9521731;rs9521735;rs11838776;rs35166119;rs9670663;rs71440063;rs35010366;rs72657918;rs7333991	10	rs11617955;rs3742207;rs9521636;rs9521642;rs11619113;rs4773141;rs9515203;rs35166119;rs72657918;rs7333991
CAD	141	13:113636156:C:T	rs9549328	13q34	13	113636156	2.999e-08	113613383	113659706	38	1	1	rs9549328	1	rs9549328
CAD	142	14:75446879:C:G	rs10131894	14q24.3	14	75446879	7.594e-13	75416000	75671659	319	191	3	rs10131894;rs96358;rs12894709	1	rs10131894
CAD	143	14:94838142:G:T	rs112635299	14q32.13	14	94838142	1.978e-10	94838142	94844947	2	2	1	rs112635299	1	rs112635299
CAD	144	14:100123487:C:T	rs36033161	14q32.2	14	100123487	1.338e-24	100078900	100189109	70	57	9	rs36033161;rs11626111;rs10139550;rs8003602;rs7148504;rs34640436;rs12882487;rs12587879;rs7342498	1	rs36033161
CAD	145	15:58730498:C:T	rs588136	15q21.3	15	58730498	6.974e-10	58718998	58741891	23	8	1	rs588136	1	rs588136
CAD	146	15:67455630:C:T	rs56062135	15q22.33	15	67455630	2.27e-22	67340316	67468285	47	26	4	rs12904944;rs56062135;rs7179840;rs10152544	2	rs12904944;rs56062135
CAD	147	15:79141784:C:T	rs7173743	15q25.1	15	79141784	3.257e-44	78941119	79215568	788	519	32	rs12442575;rs1809414;rs2869876;rs1077190;rs1021069;rs62011003;rs12050535;rs3971872;rs8023822;rs62010525;rs112238647;rs7174367;rs3743058;rs62014860;rs11634042;rs67745769;rs56031815;rs7163204;rs3861180;rs12438734;rs74608880;rs117960007;rs6495351;rs112813907;rs7173743;rs11635498;rs28408315;rs17487514;rs2277549;rs77719127;rs6495338;rs28439027	6	rs12442575;rs112238647;rs3743058;rs74608880;rs112813907;rs7173743
CAD	148	15:81385552:G:T	rs2683260	15q25.1	15	81385552	2.626e-10	81334757	81398791	34	8	2	rs2683260;rs11636914	1	rs2683260
CAD	149	15:89565257:A:C	rs1807214	15q26.1	15	89565257	2.347e-13	89562814	89580299	56	42	2	rs1807214;rs8042271	1	rs1807214
CAD	150	15:91428589:G:T	rs7183988	15q26.1	15	91428589	2.689e-33	91391250	91443059	70	53	8	rs7183988;rs2521501;rs10744971;rs12185121;rs12904679;rs11855381;rs7497418;rs6226	1	rs7183988
CAD	151	15:96146414:A:C	rs17581137	15q26.2	15	96146414	8.319e-09	96143559	96179390	25	3	1	rs17581137	1	rs17581137
CAD	152	16:15909513:A:C	rs12691049	16p13.11	16	15909513	2.54e-09	15901583	15919352	30	19	2	rs12691049;rs3915425	1	rs12691049
CAD	153	16:56987015:C:T	rs12446515	16q13	16	56987015	9.746e-12	56985514	57006829	24	16	2	rs12446515;rs9939224	2	rs12446515;rs9939224
CAD	154	16:72052348:A:G	rs11648003	16q22.2	16	72052348	7.835e-09	71987875	72148419	44	12	2	rs11648003;rs8055242	1	rs11648003
CAD	155	16:75442143:G:T	rs8046696	16q23.1	16	75442143	1.641e-20	75232528	75519917	646	486	16	rs55993634;rs66502159;rs9937988;rs6564238;rs56787417;rs7188857;rs145490559;rs467223;rs9989421;rs8056223;rs8046696;rs11639783;rs37606;rs247454;rs73605154;rs9922008	2	rs55993634;rs8046696
CAD	156	16:81907867:G:T	rs7189462	16q23.3	16	81907867	7.762e-09	81488358	81908816	100	25	2	rs10493891;rs7189462	2	rs10493891;rs7189462
CAD	157	16:83045790:A:G	rs7500448	16q23.3	16	83045790	1.108e-17	82997740	83079239	49	23	4	rs7500448;rs68166703;rs4783307;rs12929479	1	rs7500448
CAD	158	16:86699186:A:C	rs299946	16q24.1	16	86699186	4.358e-08	86694310	86717254	25	1	1	rs299946	1	rs299946
CAD	159	17:2068932:A:C	rs4790881	17p13.3	17	2068932	1.291e-19	1958536	2585113	564	295	12	rs2641431;rs903162;rs2126202;rs9896317;rs9896535;rs4061660;rs4790881;rs3760229;rs67703045;rs9894634;rs8068571;rs7218235	4	rs2641431;rs4790881;rs8068571;rs7218235
CAD	160	17:17740281:C:T	rs13306736	17p11.2	17	17740281	6.92e-10	17499544	18036283	484	157	4	rs13306736;rs854769;rs12942708;rs7214245	1	rs13306736
CAD	161	17:27938424:C:T	rs11080107	17q11.2	17	27938424	5.84e-12	27924568	28528842	262	19	2	rs11080107;rs2289629	1	rs11080107
CAD	162	17:40260865:A:C	rs2158067	17q21.2	17	40260865	4.504e-10	40256498	40824834	168	81	3	rs2158067;rs3744484;rs8068844	2	rs2158067;rs8068844
CAD	163	17:47404628:G:T	rs62076439	17q21.32	17	47404628	1.254e-15	44967530	47514127	725	440	28	rs17608766;rs16948321;rs113208880;rs62078383;rs76796325;rs35895680;rs11652684;rs2411759;rs2289636;rs11079853;rs11652858;rs1962412;rs12940898;rs4643373;rs11653468;rs62076439;rs2671654;rs4987082;rs55978930;rs112075909;rs12601665;rs12948327;rs8075803;rs12602769;rs2960166;rs2898883;rs111942199;rs8079832	6	rs17608766;rs16948321;rs62078383;rs4643373;rs62076439;rs2898883
CAD	164	17:59239259:C:T	rs9905761	17q23.2	17	59239259	1.89e-12	58826985	59288406	563	283	5	rs9905761;rs7212526;rs9913434;rs9915606;rs72844913	1	rs9905761
CAD	165	17:62392403:G:T	rs11079536	17q23.3	17	62392403	1.005e-12	62363829	62410411	75	54	5	rs11079536;rs7225219;rs2331555;rs1867625;rs6504215	1	rs11079536
CAD	166	17:66469400:G:T	rs2952286	17q24.2	17	66469400	2.205e-09	66427696	66505856	47	13	1	rs2952286	1	rs2952286
CAD	167	17:73841285:C:T	rs2410859	17q25.1	17	73841285	4.319e-09	73784214	73952993	98	17	1	rs2410859	1	rs2410859
CAD	168	17:76913843:C:T	rs8066695	17q25.3	17	76913843	3.83e-08	76897139	76934714	37	1	1	rs8066695	1	rs8066695
CAD	169	18:20009691:C:T	rs9951447	18q11.2	18	20009691	3.501e-10	19998810	20055993	79	56	6	rs10048227;rs16967171;rs9951447;rs599489;rs2110135;rs1893250	2	rs10048227;rs9951447
CAD	170	18:46515916:G:T	rs9945890	18q21.1	18	46515916	2.53e-11	46509927	46528787	28	19	2	rs9945890;rs2337155	1	rs9945890
CAD	171	18:47213682:A:G	rs12965923	#N/A	18	47213682	5.617e-11	47192805	47254251	47	17	3	rs12965923;rs62101784;rs9964304	1	rs12965923
CAD	172	18:56960510:C:T	rs11663411	#N/A	18	56960510	2.598e-08	56945392	57063004	70	9	1	rs11663411	1	rs11663411
CAD	173	18:57852587:C:T	rs476828	18q21.32	18	57852587	1.433e-08	57732418	57912226	121	32	1	rs476828	1	rs476828
CAD	174	19:8429323:A:G	rs116843064	19p13.2	19	8429323	3.56e-21	8429323	8621380	75	6	3	rs116843064;rs12150986;rs2967778	3	rs116843064;rs12150986;rs2967778
CAD	175	19:11188117:C:T	rs55997232	19p13.2	19	11188117	2.326e-44	10727014	11526765	570	337	28	rs8110479;rs9797854;rs4425006;rs11881156;rs17850995;rs73013166;rs2304087;rs12052200;rs1529729;rs3786725;rs2421201;rs11085758;rs10401845;rs17265047;rs12710258;rs8105092;rs4804557;rs55997232;rs73015030;rs67337506;rs9105;rs6511721;rs1569372;rs2738447;rs4804573;rs7247840;rs147762096;rs167479	7	rs8110479;rs2304087;rs55997232;rs6511721;rs4804573;rs147762096;rs167479
CAD	176	19:17219105:A:G	rs7246865	19p13.11	19	17219105	1.915e-08	17156501	17228554	31	1	1	rs7246865	1	rs7246865
CAD	177	19:17829608:C:T	rs10410487	19p13.11	19	17829608	3.337e-15	17826412	17893602	107	70	3	rs10410487;rs10414279;rs10427063	1	rs10410487
CAD	178	19:18575193:A:G	rs78030362	19p13.11	19	18575193	1.048e-20	18575193	18803997	21	12	4	rs78030362;rs144474740;rs17852385;rs112416151	1	rs78030362
CAD	179	19:41826020:A:C	rs56254331	19q13.2	19	41826020	3.901e-20	41731175	41946095	319	235	13	rs8109627;rs12980942;rs11466345;rs12984621;rs12983027;rs77658816;rs56254331;rs55994820;rs4803455;rs1800469;rs75041078;rs8108357;rs7259900	3	rs8109627;rs56254331;rs4803455
CAD	180	19:45412079:C:T	rs7412	19q13.32	19	45412079	1.039e-54	45232161	46374916	243	113	26	rs10401176;rs62117160;rs28399653;rs61679753;rs2927472;rs404935;rs41290120;rs6509173;rs6859;rs71352238;rs449647;rs405509;rs157595;rs429358;rs12721046;rs147711004;rs157581;rs7412;rs144311893;rs28795074;rs12721109;rs148933445;rs11670562;rs8108474;rs4802262;rs1964272	10	rs10401176;rs28399653;rs2927472;rs6859;rs449647;rs405509;rs429358;rs7412;rs11670562;rs8108474
CAD	181	20:17596155:A:C	rs1132274	20p12.1	20	17596155	1.801e-08	17546574	17607788	18	3	1	rs1132274	1	rs1132274
CAD	182	20:33358499:A:T	rs6088595	20q11.22	20	33358499	9.892e-11	32903904	33880146	519	166	8	rs6088595;rs17122844;rs945959;rs8116198;rs45465702;rs867186;rs6058220;rs78449612	2	rs6088595;rs867186
CAD	183	20:39142516:A:G	rs2207132	20q12	20	39142516	6.647e-10	39142516	39971828	47	16	3	rs2207132;rs6102343;rs6016511	2	rs2207132;rs6102343
CAD	184	20:44608901:A:G	rs8124182	20q13.12	20	44608901	4.461e-12	44532484	44612997	13	6	1	rs8124182	1	rs8124182
CAD	185	20:47433150:C:T	rs2008614	20q13.13	20	47433150	1.459e-09	47409390	47501512	47	30	2	rs2008614;rs74273497	1	rs2008614
CAD	186	20:57739469:A:T	rs6026739	20q13.32	20	57739469	1.119e-10	57674685	57784527	148	114	2	rs6026739;rs6026703	1	rs6026739
CAD	187	21:35593827:A:G	rs28451064	21q22.11	21	35593827	1.644e-46	35560715	35717962	146	136	12	rs28451064;rs4816479;rs9983490;rs2009879;rs762158;rs117504872;rs4817631;rs79158929;rs62213695;rs9980151;rs149487184;rs4817639	3	rs28451064;rs149487184;rs4817639
CAD	188	22:19960184:C:G	rs71313931	22q11.21	22	19960184	2.302e-09	19960184	20004311	38	8	1	rs71313931	1	rs71313931
CAD	189	22:24555861:A:G	rs12484557	22q11.23	22	24555861	4.012e-09	24435954	24888192	281	46	2	rs12484557;rs62233066	2	rs12484557;rs62233066
CAD	190	22:30669883:A:G	rs6006426	22q12.2	22	30669883	9.895e-12	30667277	30669883	2	2	1	rs6006426	1	rs6006426
CAD	191	22:43623972:A:G	rs139012	#N/A	22	43623972	2.125e-08	43612426	43626035	14	5	1	rs139012	1	rs139012
VTE	1	1:11197467:A:G	rs12097293	1p36.22	1	11197467	1.574e-08	11100898	11344629	210	8	1	rs12097293	1	rs12097293
VTE	2	1:118146031:G:T	rs3754120	1p12	1	118146031	8.204e-09	118128145	118178654	121	52	3	rs3754120;rs1657820;rs826414	2	rs3754120;rs826414
VTE	3	1:150264106:C:T	rs6693697	1q21.2	1	150264106	1.617e-09	150247311	150521026	406	41	4	rs6693697;rs6693567;rs6663989;rs2274127	1	rs6693697
VTE	4	1:154984363:A:G	rs1870940	1q21.3	1	154984363	7.145e-09	154984363	155014426	13	4	2	rs1870940;rs6673081	1	rs1870940
VTE	5	1:169481223:C:G	rs6427196	1q24.2	1	169481223	1e-305	168370260	170491775	2711	1975	133	rs78624203;rs111414961;rs72703796;rs111307211;rs75904197;rs72705895;rs6693048;rs72707947;rs72703795;rs12058546;rs12567872;rs2064298;rs10918943;rs1933116;rs1538173;rs544013;rs553743;rs76860700;rs182319108;rs115729201;rs12117978;rs2786768;rs12075656;rs590875;rs6427149;rs2744658;rs604627;rs34258243;rs200574;rs971411;rs7526462;rs16861623;rs116120384;rs4656640;rs3007385;rs1322487;rs2419691;rs1322490;r…	37	rs78624203;rs111414961;rs75904197;rs72705895;rs12567872;rs2064298;rs1933116;rs12117978;rs2744658;rs34258243;rs16861623;rs116120384;rs3007385;rs35990973;rs12042944;rs116140155;rs2982467;rs113079063;rs36013507;rs1200117;rs1358714;rs77977611;rs2143289;rs3820048;rs3766042;rs16861990;rs2014878;rs115289994;rs12408451;rs6427196;rs9332600;rs10753787;rs3917862;rs139541321;rs6692451;rs114233289;rs12749012
VTE	6	1:201768789:A:G	rs3001023	1q32.1	1	201768789	6.394e-13	201760981	201887457	97	59	3	rs3001023;rs2820319;rs4494199	1	rs3001023
VTE	7	1:207271862:G:T	rs78667607	1q32.2	1	207271862	1.373e-18	207271862	207285043	7	3	1	rs78667607	1	rs78667607
VTE	8	1:218699815:A:G	rs57615042	1q41	1	218699815	1.99e-11	218562868	218701451	148	31	2	rs57615042;rs10482771	1	rs57615042
VTE	9	1:243829549:A:G	rs2087072	1q44	1	243829549	4.896e-08	243690491	244025317	129	1	1	rs2087072	1	rs2087072
VTE	10	1:248039451:C:T	rs3811444	1q44	1	248039451	5.728e-11	248038210	248041821	3	2	1	rs3811444	1	rs3811444
VTE	11	2:36783215:C:T	rs10181664	2p22.2	2	36783215	4.897e-14	36735024	36860608	163	116	6	rs10181664;rs2372604;rs11678218;rs10205290;rs12464610;rs1523785	1	rs10181664
VTE	12	2:56106928:C:T	rs59985551	2p16.1	2	56106928	3.944e-08	55989737	56115469	65	1	1	rs59985551	1	rs59985551
VTE	13	2:68619981:A:C	rs1867312	2p14	2	68619981	2.114e-19	68577734	68660965	123	46	4	rs1867312;rs2289689;rs6744216;rs11126184	1	rs1867312
VTE	14	2:128175875:A:G	rs1799809	2q14.3	2	128175875	1.929e-31	127932551	128375094	399	273	16	rs1799809;rs2069924;rs2069928;rs6749002;rs10928767;rs4662582;rs1549766;rs6709113;rs10198483;rs74707659;rs4321325;rs11683427;rs6430934;rs56273408;rs2069904;rs72843327	2	rs1799809;rs72843327
VTE	15	2:198545250:C:G	rs78872368	2q33.1	2	198545250	4.322e-08	198244598	198954831	327	1	1	rs78872368	1	rs78872368
VTE	16	2:211540507:A:C	rs1047891	2q34	2	211540507	3.802e-10	211540507	211652980	76	4	3	rs1047891;rs55932961;rs4673553	1	rs1047891
VTE	17	3:90067332:C:G	rs140602438	#N/A	3	90067332	8.381e-14	89242853	90503193	567	210	7	rs140602438;rs7641059;rs9858006;rs28623022;rs819293;rs1464463;rs4974358	2	rs140602438;rs9858006
VTE	18	3:93650604:A:G	rs6795524	#N/A	3	93650604	2.927e-17	93506931	94250041	408	116	11	rs7616142;rs6123;rs6795524;rs7643498;rs9818721;rs62266990;rs2360830;rs13321260;rs111315098;rs9822589;rs1598219	3	rs7616142;rs6795524;rs9822589
VTE	19	3:126273469:A:G	rs10934779	3q21.3	3	126273469	2.313e-10	126227185	126283079	60	37	1	rs10934779	1	rs10934779
VTE	20	3:156795525:A:G	rs9854955	3q25.31	3	156795525	6.117e-12	156791268	156798775	17	16	1	rs9854955	1	rs9854955
VTE	21	3:186454180:A:C	rs5030062	3q27.3	3	186454180	6.384e-13	186431070	186469661	22	12	2	rs5030062;rs7647509	1	rs5030062
VTE	22	3:194788252:A:G	rs56324901	3q29	3	194788252	3.108e-11	194780211	194805031	45	25	2	rs56324901;rs67381912	1	rs56324901
VTE	23	4:83939171:C:T	rs10033399	4q21.22	4	83939171	2.688e-08	83737214	84003233	196	1	1	rs10033399	1	rs10033399
VTE	24	4:86704797:A:G	rs10516757	#N/A	4	86704797	1.251e-10	86701617	86760684	36	29	4	rs10516757;rs12710823;rs72976751;rs1563000	1	rs10516757
VTE	25	4:155525695:A:G	rs2066864	4q31.3	4	155525695	1.06e-190	155106847	155678217	403	191	43	rs9884775;rs62330361;rs4696576;rs4323084;rs28588655;rs184310561;rs138889324;rs4463047;rs79201245;rs116333064;rs13121749;rs7666020;rs12645631;rs4554047;rs7681708;rs4547780;rs35290073;rs12648258;rs28673871;rs2070006;rs74745756;rs6536024;rs4482740;rs72679178;rs13435101;rs13112318;rs28365896;rs145687129;rs115999709;rs150244948;rs2070008;rs62330424;rs1049636;rs4557243;rs2066864;rs71605214;rs17373860;r…	12	rs9884775;rs184310561;rs138889324;rs13121749;rs35290073;rs28365896;rs115999709;rs2070008;rs2066864;rs72681247;rs7660987;rs35555271
VTE	26	4:187207381:C:T	rs2289252	4q35.2	4	187207381	3.54e-196	186947231	187524525	592	362	68	rs142316601;rs72646257;rs4253403;rs77254623;rs75357674;rs143970142;rs56379917;rs10866290;rs7683424;rs10004932;rs72646269;rs7687961;rs72646294;rs6821390;rs4253244;rs4253287;rs4253314;rs4241822;rs11132383;rs12186258;rs6836491;rs2036914;rs4253434;rs6824705;rs13143773;rs4253269;rs4253333;rs4253398;rs4253416;rs11938564;rs2292426;rs2292428;rs4253267;rs4253288;rs4253418;rs6843711;rs6818689;rs907439;rs10…	19	rs142316601;rs143970142;rs10866290;rs72646269;rs72646294;rs6821390;rs4253269;rs4253288;rs59634726;rs4253408;rs2289252;rs7687352;rs7688348;rs78134251;rs1809101;rs75440104;rs12331973;rs7685922;rs35670235
VTE	27	5:32830521:C:T	rs1173727	5p13.3	5	32830521	5.619e-10	32804528	32832474	14	10	1	rs1173727	1	rs1173727
VTE	28	5:38709629:A:G	rs12517759	5p13.1	5	38709629	1.219e-09	38707871	38796141	37	17	2	rs12517759;rs62353355	2	rs12517759;rs62353355
VTE	29	5:96248795:C:T	rs1363976	5q15	5	96248795	1.051e-09	96200770	96373750	314	79	1	rs1363976	1	rs1363976
VTE	30	5:108165445:C:T	rs889269	5q21.3	5	108165445	1.992e-08	108054728	108235987	206	5	1	rs889269	1	rs889269
VTE	31	5:132397351:A:G	rs55747751	5q31.1	5	132397351	2.621e-14	132349654	132466540	123	15	3	rs55747751;rs72801480;rs72801445	1	rs55747751
VTE	32	6:25537194:C:T	rs214060	6p22.2	6	25537194	4.85e-14	25525120	26124634	55	35	5	rs214060;rs212934;rs12526480;rs4645;rs79920061	2	rs214060;rs4645
VTE	33	6:121863829:G:T	rs7744054	#N/A	6	121863829	2.754e-08	121854778	121899251	17	2	1	rs7744054	1	rs7744054
VTE	34	6:147701133:G:T	rs9373523	6q24.3	6	147701133	8.44e-13	147483969	147714725	139	91	3	rs9373523;rs499393;rs2786187	1	rs9373523
VTE	35	7:28259233:C:T	rs1513275	7p15.1	7	28259233	2.584e-08	28139386	28259233	84	4	2	rs1513275;rs886663	1	rs1513275
VTE	36	7:92243719:C:T	rs42038	7q21.2	7	92243719	6.166e-10	92223518	92327026	53	40	3	rs42038;rs3731326;rs42033	1	rs42038
VTE	37	8:6651969:A:G	rs11774252	8p23.1	8	6651969	9.354e-11	6642801	6657278	34	22	2	rs11774252;rs13282633	1	rs11774252
VTE	38	8:9185179:C:G	rs34290760	8p23.1	8	9185179	1.482e-11	9168146	9231661	46	7	3	rs34290760;rs35555151;rs370720	1	rs34290760
VTE	39	8:27820792:A:G	rs10087301	8p21.1	8	27820792	1.362e-12	27787717	27831887	51	41	2	rs10087301;rs2685417	1	rs10087301
VTE	40	8:42324760:C:T	rs2978457	8p11.21	8	42324760	2.135e-09	42324760	42324765	2	2	1	rs2978457	1	rs2978457
VTE	41	8:106581528:A:T	rs6993770	8q23.1	8	106581528	8.306e-30	106512481	106593662	126	86	11	rs6993770;rs16873415;rs6995272;rs302953;rs12679049;rs12675041;rs996488;rs1450161;rs10505076;rs72673751;rs6993696	1	rs6993770
VTE	42	9:93602967:A:G	rs10993706	#N/A	9	93602967	6.095e-09	93597677	93608758	6	5	1	rs10993706	1	rs10993706
VTE	43	9:99091009:C:T	rs10990535	9q22.32	9	99091009	1.919e-09	99086831	99314012	16	4	1	rs10990535	1	rs10990535
VTE	44	9:136154168:C:T	rs579459	9q34.2	9	136154168	1.2e-305	135866940	136400566	1115	596	119	rs6597600;rs2073927;rs3761824;rs571780;rs35200151;rs7855466;rs78590974;rs117210485;rs8193009;rs11244006;rs7868232;rs7862461;rs2886307;rs10793953;rs11244032;rs11244035;rs11244037;rs11794634;rs11244061;rs71503180;rs113016973;rs35698328;rs113845480;rs62575992;rs78602133;rs60526253;rs11793768;rs7469576;rs4363269;rs8176704;rs7848366;rs590488;rs28551042;rs142397281;rs11244051;rs11244084;rs41302673;rs81…	22	rs6597600;rs35200151;rs7868232;rs71503180;rs11793768;rs11244051;rs8176693;rs8176630;rs579459;rs9411490;rs557317;rs68032997;rs147278971;rs79158370;rs11791119;rs652600;rs3094377;rs3094326;rs73550898;rs34628564;rs28463601;rs13300181
VTE	45	10:21873295:G:T	rs7905967	10p12.31	10	21873295	4.621e-09	21766969	22288132	182	13	1	rs7905967	1	rs7905967
VTE	46	10:71245276:C:T	rs78707713	10q22.1	10	71245276	1.6e-99	71145819	71302731	407	217	21	rs1367517;rs17490500;rs12769200;rs60372179;rs34494957;rs34377151;rs78707713;rs80118685;rs3829182;rs1864589;rs55644640;rs1665581;rs77364098;rs61848438;rs77544432;rs1238704;rs56233660;rs3793853;rs137936874;rs149172666;rs144194132	3	rs1367517;rs78707713;rs149172666
VTE	47	10:96000282:A:G	rs7069316	10q23.33	10	96000282	1.036e-08	95971321	96129098	54	8	2	rs7069316;rs57866767	1	rs7069316
VTE	48	10:121010256:A:G	rs10886430	10q26.11	10	121010256	6.136e-32	121004561	121054613	4	4	4	rs10886430;rs10886437;rs10886443;rs56095167	1	rs10886430
VTE	49	11:47443654:C:T	rs141325867	11p11.2	11	47443654	6.034e-42	46304187	50538301	1976	487	33	rs189761107;rs11039002;rs77682558;rs11570051;rs74486166;rs17787912;rs10838642;rs10838599;rs3136516;rs6485690;rs7111517;rs72897626;rs830085;rs2305280;rs2697920;rs10838708;rs10838596;rs3136447;rs11039155;rs3740689;rs79498485;rs4752829;rs1228024;rs6485802;rs75212415;rs141325867;rs117784795;rs78807356;rs4752891;rs3740688;rs7482934;rs7948396;rs189639150	9	rs189761107;rs74486166;rs3136516;rs11039155;rs141325867;rs4752891;rs7482934;rs7948396;rs189639150
VTE	50	11:56875074:C:T	rs141798115	#N/A	11	56875074	9.404e-18	54857825	57110206	952	57	14	rs117350740;rs12421131;rs117273915;rs4939033;rs7940239;rs2512722;rs112901519;rs112407406;rs4619163;rs77235188;rs75348906;rs141798115;rs117747098;rs72925818	6	rs117350740;rs117273915;rs2512722;rs112901519;rs77235188;rs141798115
VTE	51	11:61592362:A:G	rs174566	11q12.2	11	61592362	5.972e-20	61539020	61658800	128	89	8	rs174566;rs2072114;rs174593;rs2526678;rs174619;rs174449;rs174532;rs174565	1	rs174566
VTE	52	11:77641359:A:G	rs60509203	11q14.1	11	77641359	1.389e-08	77243110	77705536	438	31	1	rs60509203	1	rs60509203
VTE	53	11:126296816:C:T	rs35257264	11q24.2	11	126296816	5.342e-11	126296816	126307796	8	5	3	rs35257264;rs11600151;rs35166255	1	rs35257264
VTE	54	12:6160614:C:T	rs7135039	12p13.31	12	6160614	4.596e-28	6023686	6170645	238	171	9	rs12423482;rs151273781;rs216335;rs7135039;rs73036509;rs71582860;rs1800379;rs68120218;rs10849378	3	rs12423482;rs216335;rs7135039
VTE	55	12:11791029:C:T	rs11054402	12p13.2	12	11791029	2.7e-08	11765547	11791685	13	1	1	rs11054402	1	rs11054402
VTE	56	12:19994917:C:G	rs11044893	#N/A	12	19994917	4.888e-09	19984383	20010909	66	2	2	rs11044893;rs7302479	1	rs11044893
VTE	57	12:54729872:C:T	rs4759076	12q13.13	12	54729872	1.981e-13	54596619	54736470	18	9	3	rs4759076;rs9739357;rs7304860	1	rs4759076
VTE	58	12:71121027:A:T	rs7960840	#N/A	12	71121027	2.412e-08	71099815	71141993	19	4	2	rs7960840;rs12826168	1	rs7960840
VTE	59	12:104147207:A:G	rs3751198	12q23.3	12	104147207	1.2e-10	103961764	104173310	55	9	3	rs1070073;rs3751198;rs12229292	2	rs1070073;rs3751198
VTE	60	12:111973358:A:G	rs597808	12q24.12	12	111973358	9.215e-13	111818487	112906415	105	15	2	rs597808;rs4766460	1	rs597808
VTE	61	12:123794871:C:G	rs4759420	12q24.31	12	123794871	1.13e-10	123450765	123913433	321	228	2	rs4759420;rs73231956	1	rs4759420
VTE	62	13:113787459:A:G	rs3211752	13q34	13	113787459	1.281e-27	113751975	113792893	12	8	7	rs3211752;rs547138;rs2026160;rs1046205;rs1475931;rs572772;rs3211736	1	rs3211752
VTE	63	14:58815839:C:T	rs1190982	14q23.1	14	58815839	2.902e-10	58651518	59013018	158	88	3	rs1190982;rs1615007;rs28637941	1	rs1190982
VTE	64	14:75255659:C:T	rs12887044	14q24.3	14	75255659	2.985e-12	75146500	75377692	178	105	2	rs12887044;rs2111705	1	rs12887044
VTE	65	14:92309229:A:G	rs1884841	14q32.12	14	92309229	3.26e-18	92210399	92333611	109	76	6	rs1884841;rs2430377;rs61988257;rs72631603;rs61237505;rs4904816	1	rs1884841
VTE	66	14:94844947:C:T	rs28929474	14q32.13	14	94844947	2.377e-13	94626683	94844947	4	3	2	rs2232710;rs28929474	2	rs2232710;rs28929474
VTE	67	14:103835290:A:C	rs12898055	14q32.32	14	103835290	1.806e-09	103831832	103983033	125	4	1	rs12898055	1	rs12898055
VTE	68	15:44027885:C:T	rs139974673	15q15.3	15	44027885	1.83e-11	43674430	44947434	180	34	2	rs139974673;rs483800	1	rs139974673
VTE	69	15:96125226:A:G	rs17502085	#N/A	15	96125226	4.676e-10	96100923	96139593	41	24	2	rs17502085;rs7183672	1	rs17502085
VTE	70	16:30968589:C:T	rs4889599	16p11.2	16	30968589	7.767e-10	30801183	31109290	176	82	2	rs4889599;rs62057232	1	rs4889599
VTE	71	16:53834607:C:T	rs7188250	16q12.2	16	53834607	2.588e-10	53798319	53845487	106	78	1	rs7188250	1	rs7188250
VTE	72	16:75488285:A:G	rs11649638	16q23.1	16	75488285	2.866e-13	75304366	75519917	403	264	4	rs11649638;rs37606;rs999674;rs11639783	1	rs11649638
VTE	73	16:81870969:C:T	rs12445050	16q23.3	16	81870969	3.342e-31	81839491	81980019	162	123	19	rs11150413;rs11150414;rs12933559;rs35386949;rs34603417;rs72834769;rs4073295;rs9673682;rs8050292;rs4998545;rs4888183;rs12445050;rs13334419;rs7188868;rs11642412;rs62046682;rs6564923;rs4616280;rs1071644	4	rs11150413;rs72834769;rs12445050;rs1071644
VTE	74	16:83979317:C:T	rs67890964	16q23.3	16	83979317	3.472e-08	83978401	83983775	7	2	1	rs67890964	1	rs67890964
VTE	75	16:88535242:C:T	rs55823018	16q24.2	16	88535242	2.286e-16	88507269	88553198	86	67	4	rs55823018;rs12597021;rs12447626;rs879628	1	rs55823018
VTE	76	17:1966457:C:T	rs1048483	17p13.3	17	1966457	6.599e-21	1958536	2203167	108	66	5	rs1048483;rs3865240;rs4790874;rs72815304;rs11657636	1	rs1048483
VTE	77	17:7784295:A:G	rs17807204	17p13.1	17	7784295	2.022e-08	7731764	7898537	24	3	1	rs17807204	1	rs17807204
VTE	78	17:67081278:A:G	rs77542162	17q24.2	17	67081278	6.954e-13	66973049	67276383	10	6	2	rs77542162;rs117753190	1	rs77542162
VTE	79	18:21140432:C:T	rs1805081	18q11.2	18	21140432	4.98e-08	21075441	21165409	76	1	1	rs1805081	1	rs1805081
VTE	80	19:10740574:C:T	rs2360742	19p13.2	19	10740574	1.833e-43	10633908	11180047	648	370	25	rs2360742;rs10417412;rs4425006;rs12974306;rs1529744;rs141611067;rs10407127;rs4804526;rs11880613;rs2278444;rs117159625;rs4804543;rs12981279;rs73496507;rs10413128;rs62128856;rs7252007;rs117831057;rs62129985;rs56202490;rs78301016;rs78043647;rs7258189;rs12971616;rs11879293	3	rs2360742;rs78301016;rs7258189
VTE	81	19:17004049:C:T	rs1054533	19p13.11	19	17004049	4.517e-08	16998719	17016127	23	1	1	rs1054533	1	rs1054533
VTE	82	19:45426792:A:G	rs141622900	19q13.32	19	45426792	2.329e-13	45369203	45426792	14	6	3	rs141622900;rs61679753;rs72654473	1	rs141622900
VTE	83	19:46180184:C:T	rs11672660	19q13.32	19	46180184	1.74e-10	46179043	46374916	76	16	3	rs11672660;rs11670136;rs2341097	2	rs11672660;rs11670136
VTE	84	19:49215095:C:T	rs4002471	19q13.33	19	49215095	4.219e-13	49168942	49261368	135	97	6	rs4002471;rs281408;rs4021;rs28745907;rs838133;rs35106244	1	rs4002471
VTE	85	19:55539072:G:T	rs892090	19q13.42	19	55539072	3.573e-19	55502846	55574907	114	74	5	rs892090;rs1671209;rs1671215;rs1654448;rs73057282	1	rs892090
VTE	86	20:23175922:G:T	rs6132574	20p11.21	20	23175922	1.463e-23	22636562	23230565	434	146	11	rs6036192;rs965762;rs6076004;rs6083015;rs6048561;rs11697283;rs35359496;rs6132574;rs6083042;rs1998084;rs6106616	5	rs6036192;rs6076004;rs6083015;rs35359496;rs6132574
VTE	87	20:33794378:A:G	rs6060308	20q11.22	20	33794378	5.188e-59	32484835	34597962	1799	1031	37	rs61626105;rs6087538;rs73610830;rs8117173;rs112825656;rs1001425;rs6087600;rs6059976;rs1984588;rs2273684;rs6088753;rs819131;rs141638867;rs117755215;rs11907011;rs3752316;rs67032674;rs6088456;rs6141533;rs2069951;rs977936;rs34613590;rs13037376;rs117046905;rs56400269;rs6060308;rs6088765;rs6058209;rs2145082;rs143384;rs6060466;rs6120825;rs6060303;rs639763;rs73109573;rs2425174;rs2425038	10	rs61626105;rs73610830;rs819131;rs6141533;rs2069951;rs56400269;rs6060308;rs639763;rs73109573;rs2425174
VTE	88	22:33177778:A:G	rs713996	22q12.3	22	33177778	1.561e-09	33148919	33237191	143	39	5	rs713996;rs2016293;rs242077;rs1079734;rs5749505	1	rs713996
VTE	89	22:39838892:G:T	rs5757675	22q13.1	22	39838892	2.096e-08	39774378	39860868	130	8	1	rs5757675	1	rs5757675
VTE	90	22:43104750:C:T	rs13055886	22q13.2	22	43104750	2.354e-14	43068401	43154299	132	60	9	rs13055886;rs5758888;rs2143920;rs6002930;rs5758915;rs5758880;rs9607928;rs135096;rs6002910	2	rs13055886;rs9607928
VTE	91	22:44324730:C:T	rs738408	22q13.31	22	44324730	1.12e-09	44324727	44379565	62	3	1	rs738408	1	rs738408
HF	1	1:109817838:C:T	rs660240	1p13.3	1	109817838	3.251e-10	109776285	109822166	21	13	3	rs660240;rs67269326;rs6657811	1	rs660240
HF	2	4:111668626:A:G	rs17042102	4q25	4	111668626	5.705e-20	111607315	111718067	171	131	5	rs17042102;rs72667982;rs2129983;rs77737462;rs4307025	1	rs17042102
HF	3	5:137012171:A:G	rs11745324	5q31.2	5	137012171	2.345e-08	137003688	137238607	68	8	1	rs11745324	1	rs11745324
[truncated: 36 more rows]

## Sheet: Supplementary Table 9
Supplementary Table 9. Prioritized genes identified for PLACO results of leukocyte telomere length and six cardiovascular diseases by functional annotation and mapping of genomic risk loci using FUMA
[truncated: 1,797 more rows]

[truncated: 9 more sheets: Supplementary Table 10, Supplementary Table 11, Supplementary Table 12, Supplementary Table 13, Supplementary Table 14, Supplementary Table 15, Supplementary Table 16, Supplementary Table 17, Supplementary Table 18]
